# Supplementary material for: Structural distortion by alkali metal cations modulates the redox and electronic properties of Ce 3+ imidophosphorane complexes
Source: Royal Society of Chemistry journal article supplement (doi:10.1039/d3sc04262f), 2023-01-01
Supplement: d3sc04262f1.pdf [file d3sc04262f1.pdf]

## Electronic Supplementary Information for

### Structural distortion by alkali metal cations modulates the redox and electronic properties of Ce<sup>3+</sup> imidophosphorane complexes

Andrew C. Boggiano†, Chad M. Studvick<sup>§</sup>, Alexander Steiner||, John Bacsa†, Ivan A. Popov\*<sup>§</sup>, and Henry S. La Pierre\*†‡

†School of Chemistry and Biochemistry, Georgia Institute of Technology, Atlanta, Georgia 30332-0400, United States

<sup>§</sup>Department of Chemistry, The University of Akron, Akron, Ohio 44325–3601, United States

||Department of Chemistry, University of Liverpool, Liverpool L69 7ZD, U.K.

‡Nuclear and Radiological Engineering and Medical Physics Program, School of Mechanical Engineering, Georgia Institute of Technology, Atlanta, Georgia 30332-0400, United States

\*Email: H.S.L. hsl@gatech.edu, I.A.P. ipopov@uakron.edu

## Table of Contents

|                                                                                                                                                                                   |            |
|-----------------------------------------------------------------------------------------------------------------------------------------------------------------------------------|------------|
| <b>General Considerations</b> .....                                                                                                                                               | <b>S3</b>  |
| <b>Nuclear Magnetic Resonance (NMR) Spectra</b> .....                                                                                                                             | <b>S7</b>  |
| 1-Ce ( <sup>1</sup> H, <sup>13</sup> C{ <sup>1</sup> H}, <sup>31</sup> P{ <sup>1</sup> H}) .....                                                                                  | S7         |
| 2-Ce <sup>Li</sup> ( <sup>1</sup> H, <sup>13</sup> C{ <sup>1</sup> H}, <sup>31</sup> P{ <sup>1</sup> H}, <sup>1</sup> H- <sup>13</sup> C HSQC) .....                              | S8         |
| 2-Ce <sup>Na</sup> ( <sup>1</sup> H, <sup>13</sup> C{ <sup>1</sup> H}, <sup>31</sup> P{ <sup>1</sup> H}) .....                                                                    | S11        |
| 2-Ce <sup>K</sup> ( <sup>1</sup> H, <sup>13</sup> C{ <sup>1</sup> H}, <sup>31</sup> P{ <sup>1</sup> H}) .....                                                                     | S13        |
| 2-Ce <sup>K18c6</sup> ( <sup>1</sup> H, <sup>13</sup> C{ <sup>1</sup> H}, <sup>31</sup> P{ <sup>1</sup> H}, <sup>13</sup> C DEPT-135, <sup>1</sup> H- <sup>13</sup> C HSQC) ..... | S14        |
| 2-Ce <sup>K222</sup> ( <sup>1</sup> H, <sup>13</sup> C{ <sup>1</sup> H}, <sup>31</sup> P{ <sup>1</sup> H}, <sup>13</sup> C DEPT-135, <sup>1</sup> H- <sup>13</sup> C HSQC).....   | S17        |
| 2-Ce <sup>Rb</sup> ( <sup>1</sup> H, <sup>13</sup> C{ <sup>1</sup> H}, <sup>31</sup> P{ <sup>1</sup> H}) .....                                                                    | S19        |
| 2-Ce <sup>Cs</sup> ( <sup>1</sup> H, <sup>13</sup> C{ <sup>1</sup> H}, <sup>31</sup> P{ <sup>1</sup> H}) .....                                                                    | S21        |
| <b>Variable-Temperature NMR Spectra</b> .....                                                                                                                                     | <b>S23</b> |
| 2-Ce <sup>Li</sup> .....                                                                                                                                                          | S24        |
| 2-Ce <sup>Na</sup> .....                                                                                                                                                          | S25        |
| 2-Ce <sup>K</sup> .....                                                                                                                                                           | S26        |
| 2-Ce <sup>K18c6</sup> .....                                                                                                                                                       | S27        |
| 2-Ce <sup>Rb</sup> .....                                                                                                                                                          | S28        |
| 2-Ce <sup>Cs</sup> .....                                                                                                                                                          | S29        |
| <b>UV-Vis-NIR Spectra</b> .....                                                                                                                                                   | <b>S30</b> |
| <b>Variable-Temperature UV-Vis Spectra</b> .....                                                                                                                                  | <b>S34</b> |
| 2-Ce <sup>Li</sup> .....                                                                                                                                                          | S34        |
| 2-Ce <sup>Na</sup> .....                                                                                                                                                          | S35        |
| <b>Cyclic Voltammetry Data</b> .....                                                                                                                                              | <b>S36</b> |
| Electrochemical Window of 50 mM [ <sup>n</sup> Bu <sub>4</sub> N][BPh <sub>4</sub> ] in THF .....                                                                                 | S36        |
| Cp* <sub>2</sub> Fe vs. Cp <sub>2</sub> Fe .....                                                                                                                                  | S36        |
| 1-Ce.....                                                                                                                                                                         | S37        |
| 2-Ce <sup>Li</sup> .....                                                                                                                                                          | S38        |

|                                                                                     |             |
|-------------------------------------------------------------------------------------|-------------|
| 2-Ce <sup>Na</sup> .....                                                            | S40         |
| 2-Ce <sup>K</sup> .....                                                             | S42         |
| 2-Ce <sup>K18c6</sup> .....                                                         | S43         |
| 2-Ce <sup>K222</sup> .....                                                          | S45         |
| 2-Ce <sup>Rb</sup> .....                                                            | S47         |
| 2-Ce <sup>Cs</sup> .....                                                            | S49         |
| <b>Differential Pulse Voltammetry .....</b>                                         | <b>S50</b>  |
| <b>Reactivity Studies .....</b>                                                     | <b>S51</b>  |
| 2-Ce <sup>K18c6</sup> + [CoCp* <sub>2</sub> ][PF <sub>6</sub> ] .....               | S51         |
| 2-Ce <sup>K18c6</sup> + [CoCp* <sub>2</sub> ][PF <sub>6</sub> ] after heating ..... | S52         |
| 2-Ce <sup>Li</sup> + [CoCp* <sub>2</sub> ][PF <sub>6</sub> ] .....                  | S53         |
| 2-Ce <sup>Li</sup> + [CoCp* <sub>2</sub> ][PF <sub>6</sub> ] after heating .....    | S54         |
| 2-Ce <sup>K18c6</sup> + benzophenone .....                                          | S55         |
| 2-Ce <sup>K18c6</sup> + benzophenone after heating .....                            | S56         |
| 2-Ce <sup>Li</sup> + benzophenone .....                                             | S57         |
| 2-Ce <sup>Li</sup> + benzophenone after heating .....                               | S58         |
| <b>NMR Spectra in Electrolyte Solution .....</b>                                    | <b>S59</b>  |
| 2-Ce <sup>Na</sup> .....                                                            | S59         |
| 2-Ce <sup>K</sup> .....                                                             | S60         |
| <b>E<sub>pa</sub> Correlation Plots .....</b>                                       | <b>S61</b>  |
| <b>Computational Details &amp; Optimized Geometry Coordinates .....</b>             | <b>S62</b>  |
| <b>Single-crystal X-ray Crystallography Data .....</b>                              | <b>S114</b> |
| 2-Ce <sup>Li</sup> .....                                                            | S120        |
| 2-Ce <sup>Na</sup> .....                                                            | S127        |
| 2-Ce <sup>K18c6</sup> .....                                                         | S131        |
| 2-Ce <sup>Rb</sup> .....                                                            | S136        |
| 2-Ce <sup>Cs</sup> .....                                                            | S138        |
| <b>References .....</b>                                                             | <b>S144</b> |

## General Considerations

Unless otherwise noted, all reagents were obtained from commercial suppliers and used as received. All manipulations were performed with rigorous exclusion of oxygen and water using Schlenk techniques under UHP argon, or in a glovebox (Vigor) under a dinitrogen atmosphere (<0.1 ppm O<sub>2</sub>/H<sub>2</sub>O). The glovebox is equipped with two -35 °C freezers and a cold well. All glassware and cannulas/needles were stored in an oven overnight (>8h) at ca. 160 °C prior to use.

**Materials:** Celite and molecular sieves were dried under vacuum at a temperature >250 °C for a minimum of 24 h. C<sub>6</sub>D<sub>6</sub> (Cambridge Isotope Laboratories or Sigma-Aldrich) was pre-dried over 3 Å molecular sieves then vacuum-transferred from purple sodium/benzophenone and stored over 3 Å molecular sieves prior to use. THF-*d*<sub>8</sub> (Cambridge) was degassed by 3 freeze-pump-thaw cycles and dried over sodium metal, then vacuum transferred stored over 3 Å molecular sieves prior to use. *n*-Pentane, hexanes, diethyl ether, toluene, and tetrahydrofuran (THF) were purged with UHP-grade argon (Airgas) and passed through columns containing Q-5/alumina and molecular sieves in a commercial solvent purification system (JC Meyer Solvent Systems, Pure Process Technology). All solvents in the glovebox were stored in media bottles over 10% v/v 3 Å molecular sieves. Fluorobenzene was distilled from P<sub>2</sub>O<sub>5</sub> and stored over 3 Å molecular sieves inside the glovebox. Methanol was dried by refluxing over magnesium turnings activated with iodine overnight under argon and then distilled and stored over 3 Å molecular sieves. Supporting electrolytes for electrochemical analysis were purified as follows: [<sup>n</sup>Bu<sub>4</sub>N][BPh<sub>4</sub>] (Sigma-Aldrich, 99% or electrochemical grade >99%)<sup>φ</sup> was recrystallized twice from 10:90 water:acetone followed by a final recrystallization from 30:70 diethyl ether:acetone, then dried under vacuum at 100 °C for a minimum of 24 h prior to use. [<sup>n</sup>Bu<sub>4</sub>N][PF<sub>6</sub>] (Oakwood) was recrystallized three times from absolute ethanol, then dried under vacuum at 85 °C for a minimum of 24 h prior to use. Ferrocene and decamethylferrocene were sublimed prior to use. [K][NP(N,N'-di-*tert*-butylethylenediamide)(diethylamide)]<sup>1</sup> (**KNP\***), CeI<sub>3</sub>(THF)<sub>4</sub><sup>2</sup>, KC<sub>8</sub><sup>3</sup>, and benzyl potassium<sup>4</sup> were prepared according to the published procedures. RbC<sub>8</sub> and CsC<sub>8</sub> were prepared analogously to KC<sub>8</sub>. Graphite was flame dried in a Schlenk flask several times under vacuum on a Schlenk line prior to use. Potassium *tert*-butoxide was sublimed prior to use in the synthesis of benzyl potassium. Immersion oils (Paratone-N, Cargille Type NVH) were degassed on a Schlenk line by stirring under active vacuum with gentle heating (to facilitate stirring, ca. 40 °C) overnight prior to use.

**Analytical:** NMR spectra were obtained on a Bruker Avance III 400 or 500 MHz spectrometer at 298 K, unless otherwise noted. <sup>1</sup>H, <sup>13</sup>C{<sup>1</sup>H}, and <sup>31</sup>P{<sup>1</sup>H} NMR chemical shifts are reported in δ, parts per million. <sup>1</sup>H NMR are referenced to the residual <sup>1</sup>H resonances of the solvent. <sup>13</sup>C{<sup>1</sup>H} NMR are referenced to the resonance of the deuterated solvent. <sup>13</sup>C DEPT-135 NMR spectra are referenced to the standard <sup>13</sup>C{<sup>1</sup>H} spectra. Peak position is listed, followed by peak multiplicity, integration value, and proton assignment, where applicable. Multiplicity and shape are indicated by one or more of the following abbreviations: s (singlet); d (doublet); t (triplet); q (quartet); dd (doublet of doublets); td (triplet of doublets); m (multiplet); br (broad). UV-visible-NIR spectroscopy was performed in small-volume screw-cap quartz cuvettes (Starna Scientific) with a 1 cm path length on a Hitachi UH4150 UV-vis-NIR scanning spectrophotometer from 1100 to 280 nm. ATR infrared measurements were performed on a Bruker ALPHA FTIR spectrometer from 400 to 4000 cm<sup>-1</sup> inside a dinitrogen glovebox. Elemental analyses were determined at the University of California Berkeley Microanalytical Facility (Berkeley, CA). X-ray structural determinations were performed at the Georgia Institute of Technology X-ray Crystallography Facility on a Bruker D8 Venture diffractometer. Crystals for X-ray analysis were coated in either Paratone N or Cargille Type NVH immersion oil inside a glovebox and brought out in a capped 20 mL scintillation vial.

<sup>φ</sup>Standard and electrochemical grade [<sup>n</sup>Bu<sub>4</sub>N][BPh<sub>4</sub>] were examined for use in cyclic voltammetry experiments. Even electrochemical grade displayed a small impurity in the background scan and required recrystallization. There was no observable difference between the standard or electrochemical grades after 3x recrystallization.

[Ce(NP(N,N'-di-*tert*-butylethylenediamide)(diethylamide))<sub>4</sub>], **1-Ce**: This a modification of a previously reported procedure.<sup>4</sup> Inside a glovebox, **KNP\*** (1.55 g, 4.7 mmol, 4 eq.) was transferred to a scintillation vial and dissolved in 18 mL of diethyl ether. This solution was then transferred to a scintillation vial charged with a glass-coated stir bar and CeI<sub>3</sub>(THF)<sub>4</sub> (0.962 g, 1.2 mmol, 1 eq.). The reaction mixture was allowed to stir at room temperature for 2 h, then AgI (0.293 g, 1.2 mmol, 1.05 eq.) was added as a solid. Any remaining AgI was suspended in 1 mL diethyl ether and transferred to the reaction vial via pipette. The reaction mixture was stirred overnight (14 h) at room temperature. The precipitates were removed via filtration through a fine frit packed with Celite. The filter cake was washed with diethyl ether until the filtrate ran clear (about 80 mL), then the bright-red filtrate was brought to an orange solid *in vacuo*. The crude product was extracted with 25 mL of *n*-pentane and filtered through a pipette packed with a glass fiber filter and Celite. The volume of the filtrate was concentrated *in vacuo* to a volume of 15 mL, after which red crystals started to form. The solution was placed in a -35°C freezer overnight during which time red crystals formed. The supernatant was then decanted off, and residual volatiles were removed *in vacuo* to give the title compound as a bright-red crystalline solid (1.31 g, 85%). All spectroscopic data are consistent with the previously reported data (Figures S1-S3)

[LiCe(NP(N,N'-di-*tert*-butylethylenediamide)(diethylamide))<sub>4</sub>], **2-Ce<sup>Li</sup>**. **1-Ce** (425 mg, 0.2 mmol, 1.0 equiv.) was dissolved in 15 mL of diethyl ether and transferred to a 50 mL Schlenk flask equipped with a glass-coated stir bar and a glass stopper. The vessel was removed from the glovebox and connected to a Schlenk line. The red solution was sparged with argon for 3 min and, under a flow of argon, coarsely divided lithium wire (ca. 140 mg, 20 mmol, excess, approximately a 3 cm piece) was added. The reaction mixture was stirred vigorously at room temperature for 14 h. The resulting pale-yellow solution was then decanted via cannula and the volatiles were removed *in vacuo*. The vessel was transferred to a glovebox, and the pale-yellow solid was taken up in 5 mL of diethyl ether and filtered through a pipette packed with a glass-fiber filter. The solution was concentrated to 2 mL volume, then placed in a -35°C freezer overnight during which time yellow crystals grew (suitable for XRD analysis). The mother liquor was decanted off and the volatiles were removed *in vacuo* to give the title compound as a bright yellow solid (250 mg). The supernatant was concentrated to <1 mL and placed in a -35°C freezer overnight to yield a second crop of crystals (344 mg combined mass, 81% total isolated yield). <sup>1</sup>H NMR (400 MHz, toluene-*d*<sub>8</sub>) T = 80°C δ 4.45 (s, 8H, FWHM = 16 Hz), 3.85 (s, 8H, FWHM = 22 Hz), 1.49 (s, 72H), 0.66 (br, 16H, FWHM = 220 Hz), -1.00 (br, 24H, FWHM = 56 Hz). <sup>13</sup>C{<sup>1</sup>H} NMR (101 MHz, toluene-*d*<sub>8</sub>) T = 80°C δ 53.65, 43.17, 37.57, 29.40, 12.11. <sup>31</sup>P{<sup>1</sup>H} NMR (162 MHz, toluene-*d*<sub>8</sub>) T = 80°C δ 74.17 (br). IR (ATR): ν [cm<sup>-1</sup>] = 2965 (m), 1474 (vw), 1460 (vw), 1376 (w), 1355 (w), 1265 (w), 1249 (w), 1194 (m), 1144 (s), 1094 (m), 1050 (m), 1022 (s), 973 (m), 925 (m), 867 (w), 794 (m), 692 (s), 628 (m), 593 (vw), 498 (s), 447 (w). Elemental analysis, C<sub>56</sub>H<sub>128</sub>CeLiN<sub>16</sub>P<sub>4</sub>, found(calculated): C 52.14(51.87), H 9.95(9.95), N 17.08(17.28).

[NaCe(NP(N,N'-di-*tert*-butylethylenediamide)(diethylamide))<sub>4</sub>], **2-Ce<sup>Na</sup>**. **1-Ce** (228 mg, 0.18 mmol, 1.0 equiv.) was dissolved in 10 mL of diethyl ether and transferred to a 20 mL scintillation vial charged with a glass-coated stir bar and a smear of Na metal (51.1 mg, 2.2 mmol, excess). After stirring at room temperature for 3 h, the pale-yellow solution was filtered through a pipette packed with a glass fiber filter and Celite. The volume of the filtrate as concentrated *in vacuo* to 2 mL and the solution was placed in a -35°C freezer. Yellow crystals grew overnight, and the supernatant was decanted off. The residual volatiles were removed *in vacuo* to give the title compound as a pale-yellow solid (135 mg, 59%). Crystals suitable for XRD analysis were grown via slow evaporation of a concentrated *n*-pentane solution at -35°C over several days. <sup>1</sup>H NMR (400 MHz, C<sub>6</sub>D<sub>6</sub>) δ 5.29 (s, 8H, FWHM = 15 Hz), 4.28 (d, J = 9.3 Hz, 8H, FWHM = 19 Hz), 1.62 (s, 72H), 0.06 (br, 16H, FWHM = 120 Hz), -1.43 (s, 24H, FWHM = 55 Hz) <sup>13</sup>C{<sup>1</sup>H} NMR (101 MHz, C<sub>6</sub>D<sub>6</sub>) δ 53.58, 43.65, 36.08, 28.74, 11.27. <sup>31</sup>P{<sup>1</sup>H} NMR (162 MHz, C<sub>6</sub>D<sub>6</sub>) δ 111.53. IR (ATR): ν [cm<sup>-1</sup>] = 2966 (m), 1477 (vw), 1375 (w), 1355 (w), 1248 (m), 1195 (m), 1148 (s), 1092 (m), 1051 (m), 1023 (m), 971 (m), 925 (m), 865 (m), 793 (m), 691 (m), 628 (w), 519 (m), 497 (m), 468 (w), 452 (w). Elemental analysis, C<sub>56</sub>H<sub>128</sub>CeNaN<sub>16</sub>P<sub>4</sub>, found(calculated): C 51.32(51.24), H 9.92(9.83), N 16.78(17.07).

[KCe(NP(N,N'-di-*tert*-butylethylenediamide)(diethylamide))<sub>4</sub>], **2-Ce<sup>K</sup>**. **1-Ce** (122 mg, 0.095 mmol, 1.0 equiv.) was added as a solid to a vial charged with 7 mL hexanes, KC<sub>8</sub> (13.4 mg, 0.010 mmol, 1.05 equiv.), and a glass-coated stir bar. The bronze suspension rapidly turned black, concomitant with the bleaching of the bright red color of the supernatant to a pale yellow. The reaction mixture was allowed to stir at room temperature for 20 min and was then filtered through a pipette packed with a glass-fiber filter and Celite. The filtrate was

concentrated to 2 mL *in vacuo* and placed in a -35°C freezer. Yellow crystals grew overnight, and the supernatant was decanted off. The residual volatiles were removed *in vacuo* to give the title compound as a pale-yellow solid (87 mg, 69%). All spectroscopic data are consistent with the previously reported data (Figures S13-S15).

[K(18-crown-6)<sub>2</sub>][Ce(NP(N,N'-di-*tert*-butylethylenediamide)(diethylamide))<sub>4</sub>], **2-Ce<sup>K18c6</sup>**: **1-Ce** (271 mg, 0.2 mmol, 1.0 equiv.) and 18-crown-6 (111 mg, 0.4 mmol, 2.0 equiv.) were dissolved in 15 mL of diethyl ether. The solution was then transferred to a 20 mL scintillation vial charged with KC<sub>8</sub> (29.8 mg, 0.22 mmol, 1.05 equiv.) and a glass-coated stir bar. The bronze suspension rapidly turned black, concomitant with the bleaching of the bright red color of the supernatant to a pale yellow. The reaction was allowed to stir at room temperature for 15 min, then the mixture was filtered through a pipette packed with a glass-fiber filter and Celite. The solution was concentrated to 3 mL *in vacuo* and placed in a -35°C freezer. Overnight, nearly colorless crystals grew, and the supernatant was decanted off. The volatiles were removed *in vacuo* to give the product as a pale-yellow solid (313 mg, 80%).

<sup>1</sup>H NMR (400 MHz, THF-*d*<sub>6</sub>) δ 3.75 (s, 16H, FWHM = 20 Hz), 3.60 (s, 48H), 2.84 (d, *J* = 12.1 Hz, 8H, FWHM = 19 Hz), 2.48 (s, 8H, FWHM = 11 Hz), 1.06 (s, 96H, FWHM = 6.6 Hz). <sup>13</sup>C{<sup>1</sup>H} NMR (101 MHz, THF-*d*<sub>6</sub>) δ 71.56, 52.52, 41.61 (d, *J* = 8.1 Hz), 40.63, 28.36, 15.26. <sup>31</sup>P{<sup>1</sup>H} NMR (162 MHz, THF-*d*<sub>6</sub>) δ 107.28. IR (ATR): ν [cm<sup>-1</sup>] = 2957 (m), 2895 (m), 1456 (w), 1382 (w), 1295 (vw), 1251 (m), 1210 (m), 1195 (m), 1175 (s), 1147 (m), 1107 (s), 1049 (m), 1025 (m), 969 (m), 914 (m), 861 (w), 838 (w), 791 (m), 686 (m), 623 (m), 592 (w), 569 (vw), 518 (m), 495 (m), 469 (m), 449 (w). Elemental analysis, C<sub>80</sub>H<sub>176</sub>CeKN<sub>16</sub>O<sub>12</sub>P<sub>4</sub>, found(calculated): C 51.47(51.73), H 9.60(9.55), N 12.34(12.07).

[K([2.2.2]-cryptand)][Ce(NP(N,N'-di-*tert*-butylethylenediamide)(diethylamide))<sub>4</sub>] **2-Ce<sup>K222</sup>**: **1-Ce** (179 mg, 0.14 mmol, 1.0 equiv.) and [2.2.2]-cryptand (52.2 mg, 0.14 mmol, 1.0 equiv.) were dissolved in 10 mL of diethyl ether and transferred to a 20 mL scintillation vial charged with KC<sub>8</sub> (19.7 mg, 0.15 mmol, 1.05 equiv.) and a glass-coated stir bar. The bronze suspension rapidly turned black, concomitant with the bleaching of the bright red color of the supernatant to a pale yellow. The reaction mixture was stirred for 15 min at room temperature, then filtered through a glass pipette packed with Celite and a glass fiber filter. The volatiles were removed *in vacuo* to give the crude product as a pale-yellow powder. The powder was taken up in 2 mL of fluorobenzene and filtered through a glass pipette packed with a glass fiber filter into a 4 mL shell vial. The solution was layered with 2 mL of *n*-pentane and placed in a -35°C freezer. Overnight, a pale-yellow powder precipitated out, which was collected on a fine-porosity frit and washed with 1 mL pentane. Residual volatiles were removed *in vacuo* to give the title compound as a pale-yellow powder (210 mg, 89%). Growth of crystals suitable for XRD analysis was not readily achievable.

<sup>1</sup>H NMR (400 MHz, THF-*d*<sub>6</sub>) δ 3.76 (br, 16H, FWHM = 22 Hz), 3.60 (s, 12H), 3.56 (t, *J* = 4.4 Hz, 12H), 2.84 (d, *J* = 12.0 Hz, 8H, FWHM = 21 Hz), 2.58 (t, *J* = 4.7 Hz, 12H), 2.47 (s, 8H, FWHM = 10 Hz), 1.06 (s, 96H, FWHM = 6.0 Hz). <sup>13</sup>C{<sup>1</sup>H} NMR (101 MHz, THF-*d*<sub>6</sub>) δ 71.51, 68.67, 54.95, 52.54, 41.62 (d, *J* = 8.8 Hz), 40.64, 28.37, 15.27. <sup>31</sup>P{<sup>1</sup>H} NMR (162 MHz, THF-*d*<sub>6</sub>) δ 107.78. IR (ATR): ν [cm<sup>-1</sup>] = 2959 (m), 2890 (m), 2822 (m), 1477 (w), 1458 (w), 1382 (w), 1354 (m), 1298 (vw), 1251 (m), 1210 (m), 1195 (m), 1174 (s), 1149 (m), 1134 (m), 1105 (m), 1079 (m), 1046 (m), 1026 (m), 970 (m), 951 (m), 916 (m), 862 (w), 833 (vw), 791 (m), 754 (vw), 687 (m), 623 (m), 592 (vw), 572 (vw), 520 (m), 495 (m), 470 (w), 450 (w). Since isolation of this compound in crystalline form was not readily achievable, elemental analysis was not performed, however, NMR spectra are free of impurities and no insoluble solids are observed upon compound dissolution in organic solvents.

[RbCe(NP(N,N'-di-*tert*-butylethylenediamide)(diethylamide))<sub>4</sub>], **2-Ce<sup>Rb</sup>**: **1-Ce** (168 mg, 0.13 mmol, 1 equiv.) was added as a solid to a 20 mL scintillation vial charged with RbC<sub>8</sub> (26.0 mg, 0.14 mmol, 1.05 equiv.), 8 mL of hexanes, and a glass-coated stir bar. Any remaining **1-Ce** was dissolved in 2 mL hexanes and transferred to the reaction vial. The bronze suspension rapidly turned black, concomitant with the bleaching of the bright red color of the supernatant to a pale yellow. After stirring at room temperature for 20 min, the reaction mixture was filtered through a pipette packed with a glass fiber filter and Celite. The pale-yellow filtrate was concentrated to 5 mL *in vacuo* and placed in a -35°C freezer. Nearly colorless, pale-yellow crystals grew overnight. The supernatant was decanted off and the residual volatiles were removed *in vacuo* to give the title compound as a nearly colorless, pale-yellow solid (145 mg, 81%). Crystals suitable for XRD analysis were grown from a concentrated hexanes solution with 1 drop of diethyl ether at -35°C.

$^1\text{H}$  NMR (400 MHz,  $\text{C}_6\text{D}_6$ )  $\delta$  4.76 (s, 8H, FWHM = 14 Hz), 3.98 (d,  $J$  = 8.5 Hz, 8H, FWHM = 17 Hz), 1.69 (s, 72H), -1.17 (s, 24H, FWHM = 36 Hz), -1.63 (br, 16H, FWHM = 230 Hz).  $^{13}\text{C}\{^1\text{H}\}$  NMR (101 MHz,  $\text{C}_6\text{D}_6$ )  $\delta$  53.07, 43.01, 33.92, 28.86, 11.36.  $^{31}\text{P}\{^1\text{H}\}$  NMR (162 MHz,  $\text{C}_6\text{D}_6$ )  $\delta$  109.08. IR (ATR):  $\nu$  [ $\text{cm}^{-1}$ ] = 2967 (m), 1476 (vw), 1374 (w), 1355 (w), 1249 (m), 1207 (m), 1194 (m), 1145 (s), 1093 (m), 1051 (m), 1022 (m), 973 (m), 918 (m), 864 (m), 794 (m), 687 (m), 623 (w), 517 (m), 497 (m), 468 (m), 449 (m). Elemental analysis,  $\text{C}_{56}\text{H}_{128}\text{CeN}_{16}\text{P}_4\text{Rb}$ , found(calculated): C 48.95(48.91), H 9.41(9.38), N 16.14(16.30).

[ $\text{CsCe}(\text{NP}(\text{N},\text{N}'\text{-di-tert-butylethylenediamide})(\text{diethylamide}))_4$ ], **2-Ce<sup>Cs</sup>: 1-Ce** (123 mg, 0.095 mmol, 1.0 equiv.) was dissolved in 6 mL of diethyl ether and transferred to a 20 mL scintillation vial charged with a glass-coated stir bar and  $\text{CsC}_8$  (22.9 mg, 0.10 mmol, 1.05 equiv.). The bronze suspension rapidly turned black, concomitant with the bleaching of the bright red color of the supernatant to a pale yellow. After stirring at room temperature for 15 min, the reaction mixture was filtered through a pipette packed with a glass fiber filter and Celite. The volume of the yellow supernatant was concentrated to 4 mL *in vacuo* and the solution was placed in a  $-35^\circ\text{C}$  freezer. Overnight, nearly colorless, XRD-quality crystals grew. The supernatant was decanted off, and the residual volatiles were removed *in vacuo* to give the title compound as a nearly colorless, pale-yellow solid (98.6 mg, 73%).

$^1\text{H}$  NMR (500 MHz,  $\text{C}_6\text{D}_6$ )  $\delta$  4.30 (s, 8H, FWHM = 15 Hz), 3.78 (d,  $J$  = 8.3 Hz, 8H, FWHM = 18 Hz), 1.62 (s, 72H), -0.93 (s, 24H, FWHM = 46 Hz), -1.28 (br, 16H, FWHM = 540 Hz).  $^{13}\text{C}\{^1\text{H}\}$  NMR (101 MHz,  $\text{C}_6\text{D}_6$ )  $\delta$  52.88, 42.48, 34.18, 28.82, 11.62.  $^{31}\text{P}\{^1\text{H}\}$  NMR (162 MHz,  $\text{C}_6\text{D}_6$ )  $\delta$  107.26. IR (ATR):  $\nu$  [ $\text{cm}^{-1}$ ] = 2967 (m), 1477 (vw), 1375 (w), 1355 (w), 1250 (m), 1208 (m), 1193 (m), 1145 (s), 1095 (m), 1050 (m), 1021 (m), 974 (m), 918 (m), 864 (m), 794 (m), 686 (m), 623 (w), 516 (m), 496 (m), 467 (m), 448 (m). Elemental analysis,  $\text{C}_{56}\text{H}_{128}\text{CeCsN}_{16}\text{P}_4$ , found(calculated): C 47.16(47.28), H 8.94(9.07), N 15.49(15.75).

# Nuclear Magnetic Resonance (NMR) Spectra

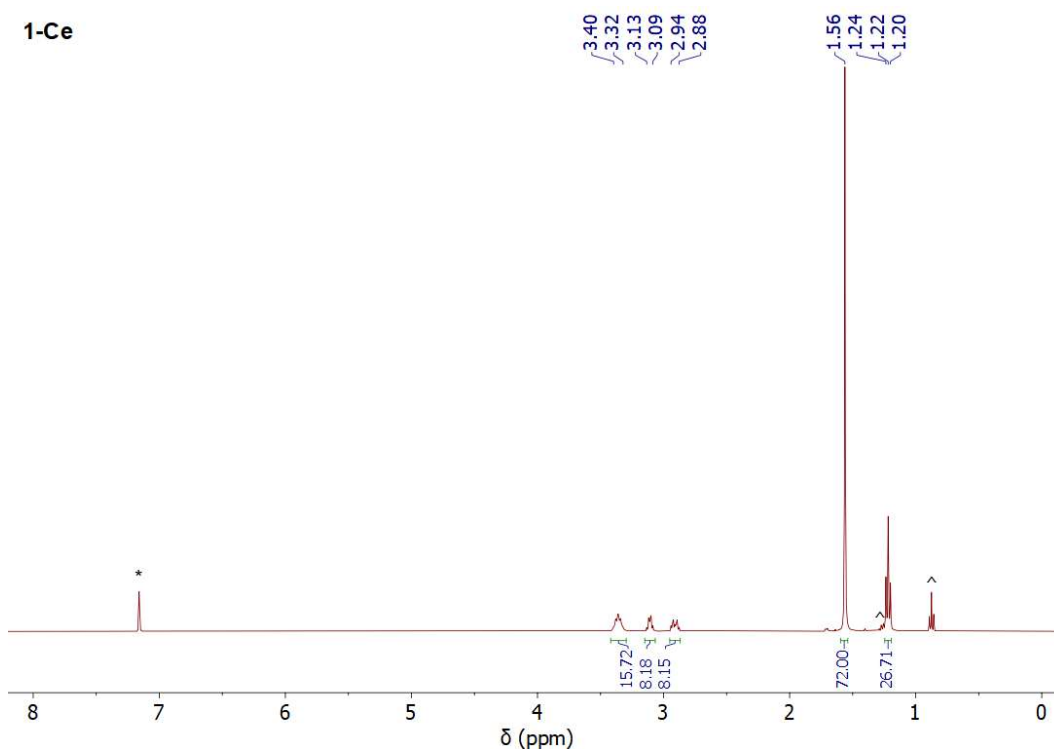

Figure S1.  $^1\text{H}$  NMR of **1-Ce** in  $\text{C}_6\text{D}_6$ . \* =  $\text{C}_6\text{D}_5\text{H}$ , ^ = *n*-pentane.

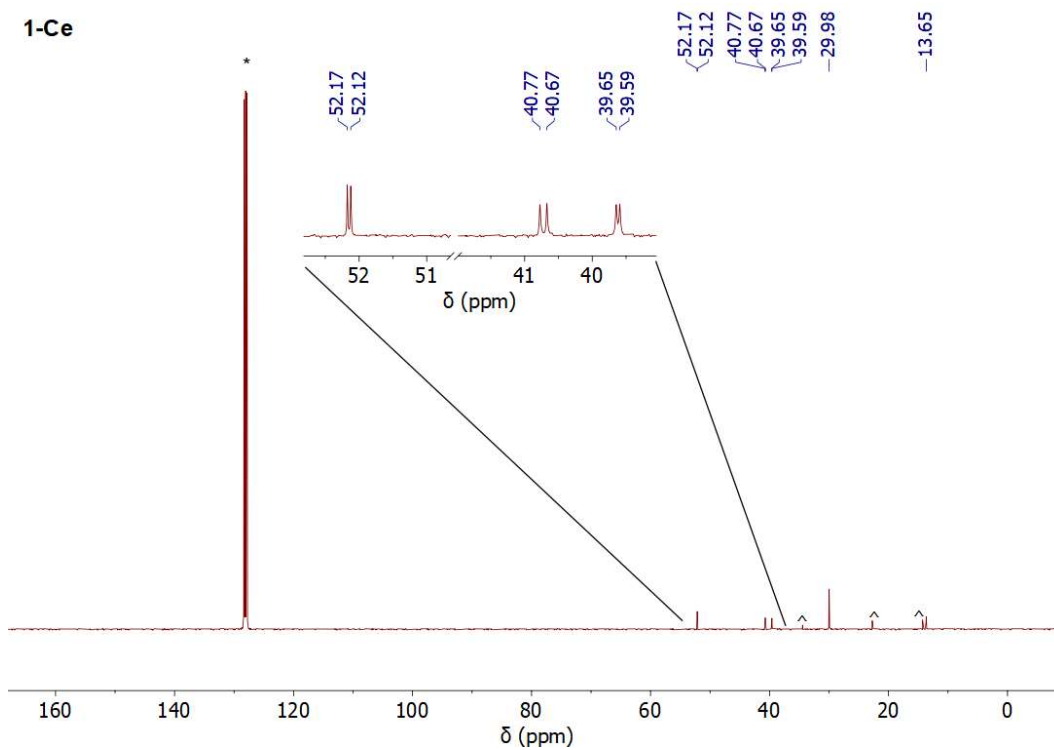

Figure S2.  $^{13}\text{C}\{^1\text{H}\}$  NMR of **1-Ce** in  $\text{C}_6\text{D}_6$ . \* =  $\text{C}_6\text{D}_6$ , ^ = *n*-pentane.

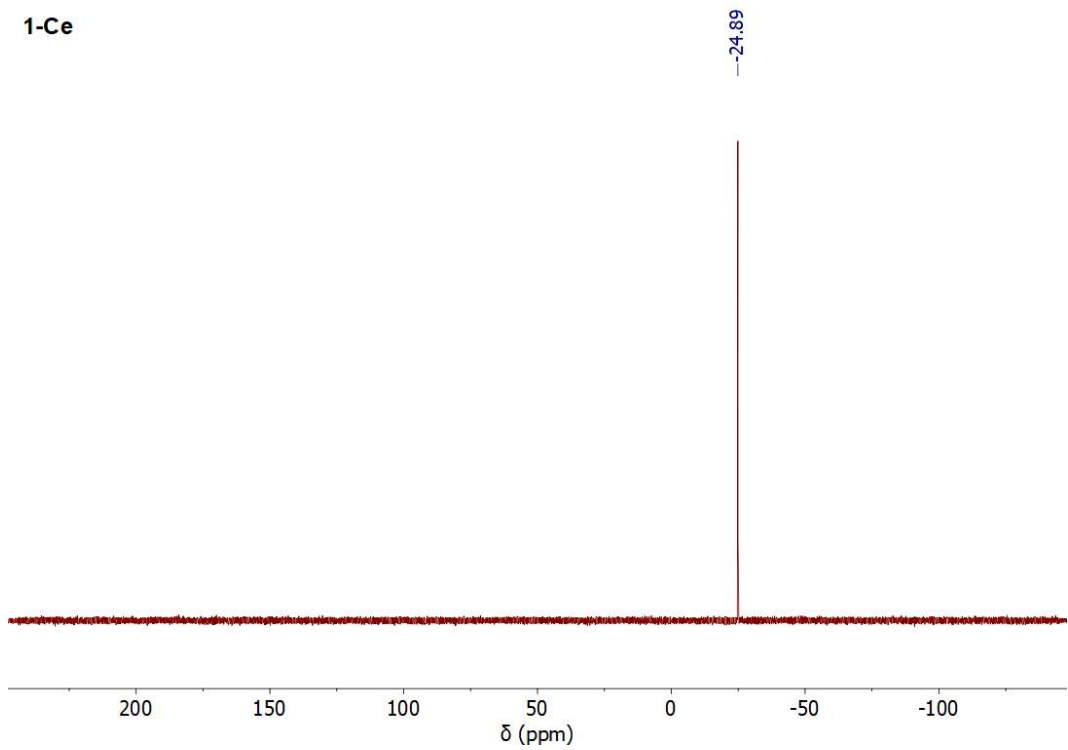

Figure S3.  $^{31}\text{P}\{^1\text{H}\}$  NMR of 1-Ce in  $\text{C}_6\text{D}_6$ .

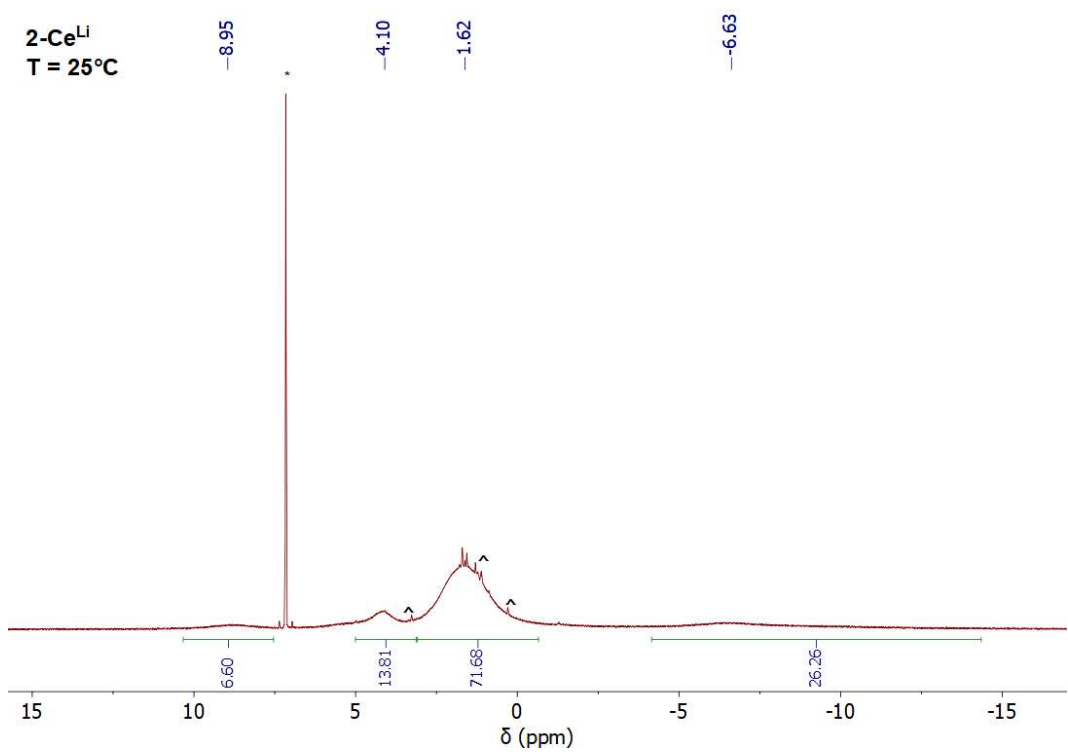

Figure S4.  $^1\text{H}$  NMR of 2-Ce<sup>Li</sup> in  $\text{C}_6\text{D}_6$ , T = +25°C. \* =  $\text{C}_6\text{D}_5\text{H}$ , ^ = *n*-pentane, Et<sub>2</sub>O.



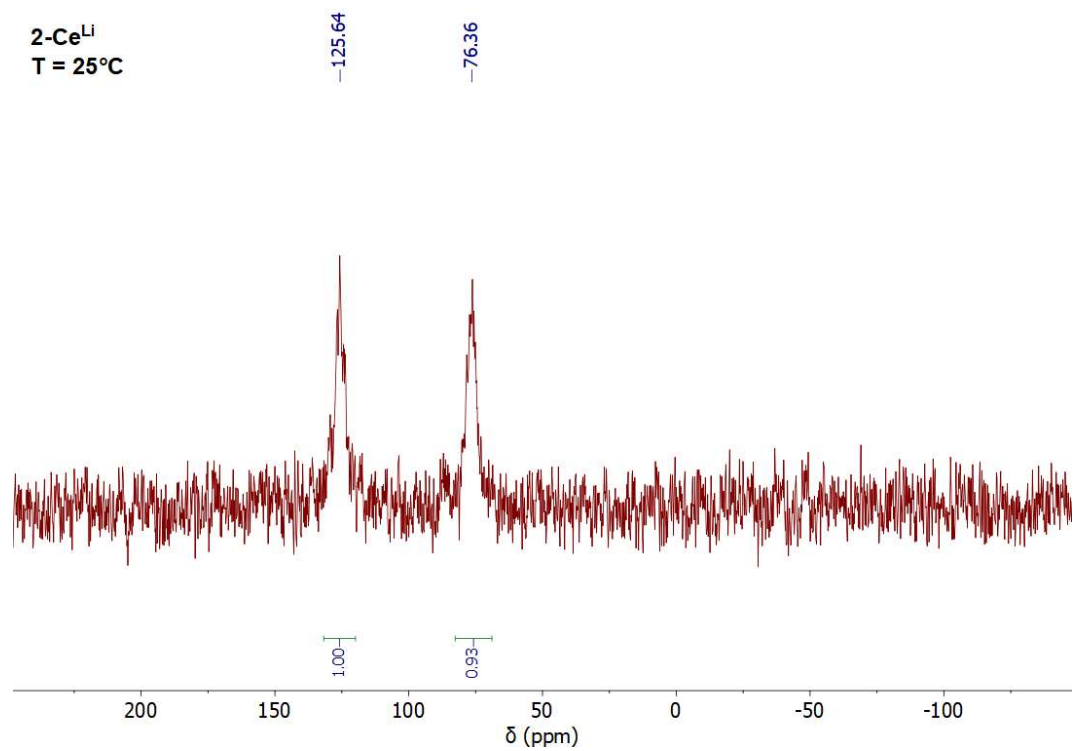

Figure S5.  $^{31}\text{P}\{^1\text{H}\}$  NMR of  $2\text{-Ce}^{\text{Li}}$  in  $\text{C}_6\text{D}_6$ ,  $T = +25^\circ\text{C}$ .

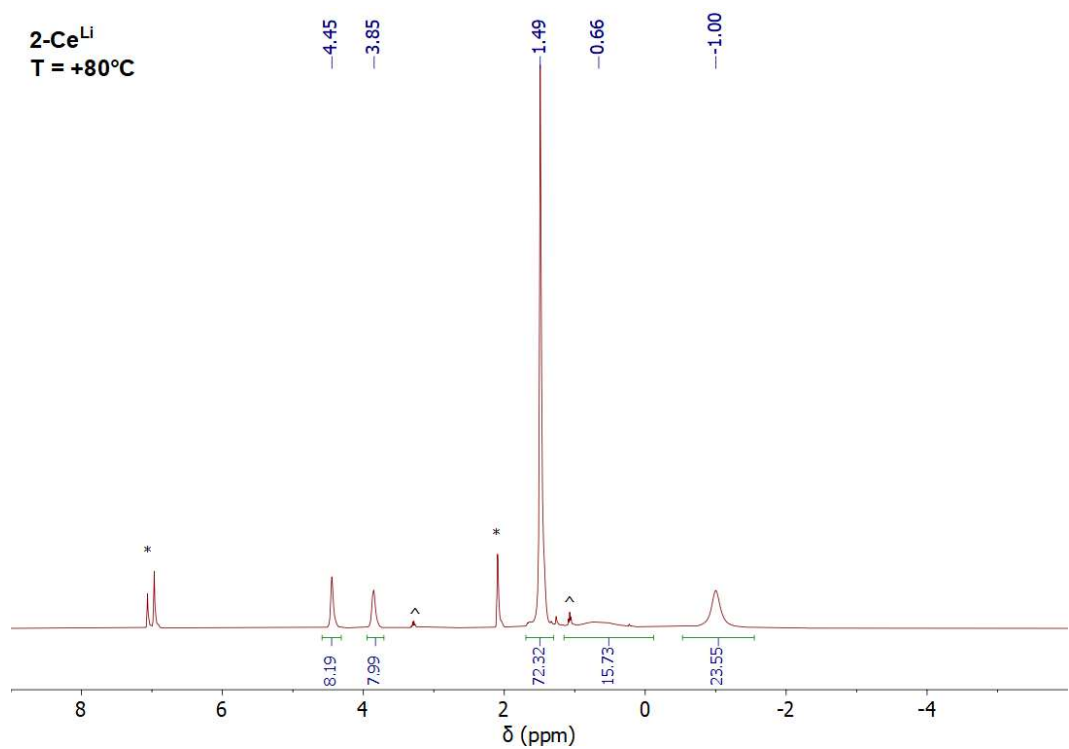

Figure S6.  $^1\text{H}$  NMR of  $2\text{-Ce}^{\text{Li}}$  in  $\text{tol-d}_8$ ,  $T = +80^\circ\text{C}$ .  $*$ = $\text{tol-d}_7$ ,  $\wedge$ = $\text{Et}_2\text{O}$ .

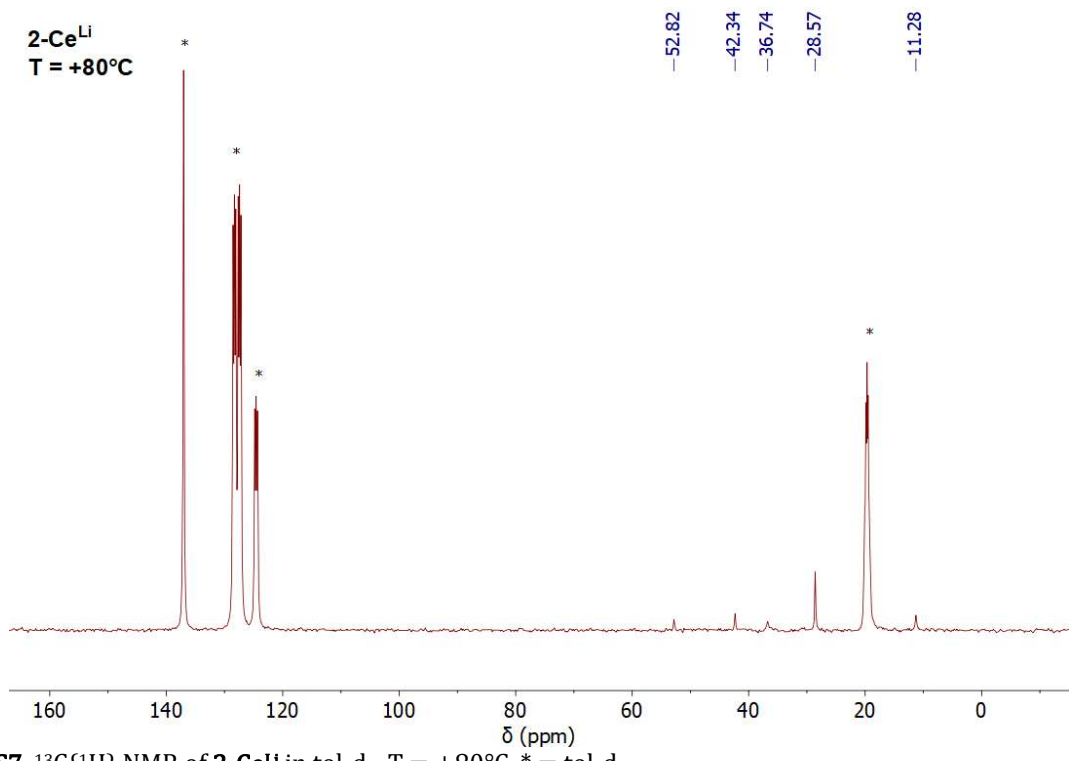

Figure S7.  $^{13}\text{C}\{^1\text{H}\}$  NMR of  $2\text{-Ce}^{\text{Li}}$  in  $\text{tol-d}_8$ ,  $T = +80^\circ\text{C}$ . \* =  $\text{tol-d}_8$ .

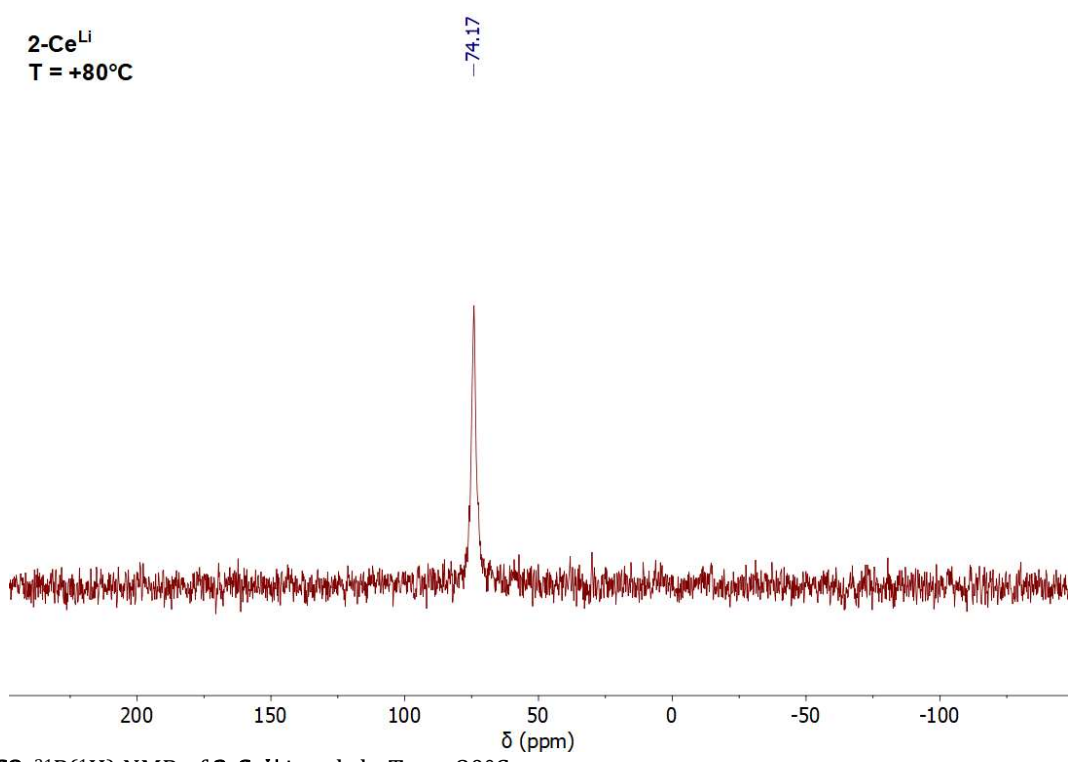

Figure S8.  $^{31}\text{P}\{^1\text{H}\}$  NMR of  $2\text{-Ce}^{\text{Li}}$  in  $\text{tol-d}_8$ ,  $T = +80^\circ\text{C}$ .

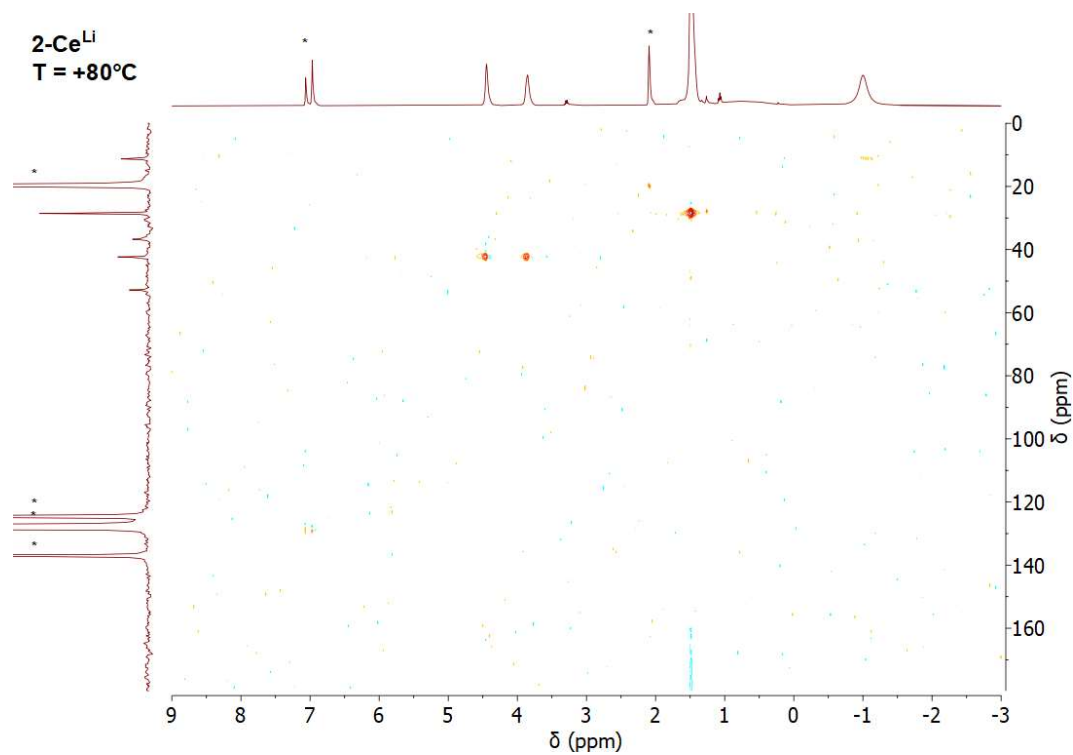

Figure S9. <sup>1</sup>H-<sup>13</sup>C HSQC NMR of **2-Ce<sup>Li</sup>** in tol-d<sub>8</sub>, T = +80°C. \* = tol-d<sub>8</sub>.

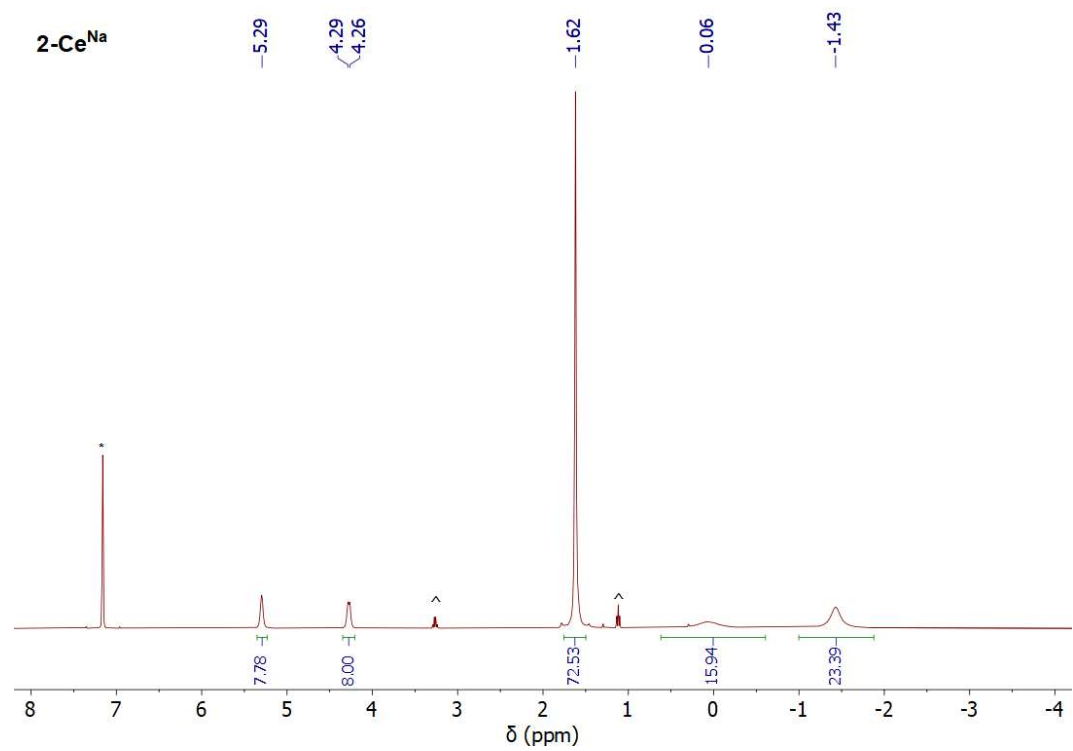

Figure S10. <sup>1</sup>H NMR of **2-Ce<sup>Na</sup>** in C<sub>6</sub>D<sub>6</sub>, \* = C<sub>6</sub>D<sub>5</sub>H, ^ = Et<sub>2</sub>O.

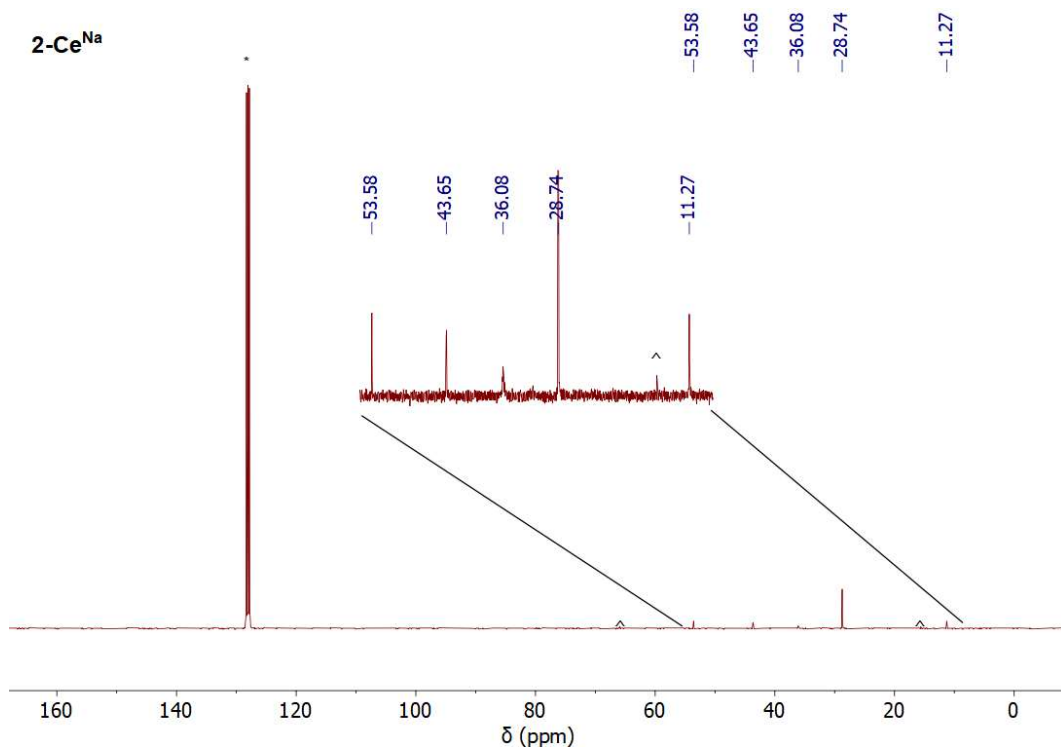

Figure S11.  $^{13}\text{C}\{^1\text{H}\}$  NMR of 2-Ce<sup>Na</sup> in C<sub>6</sub>D<sub>6</sub>, \* = C<sub>6</sub>D<sub>6</sub>, ^ = Et<sub>2</sub>O.

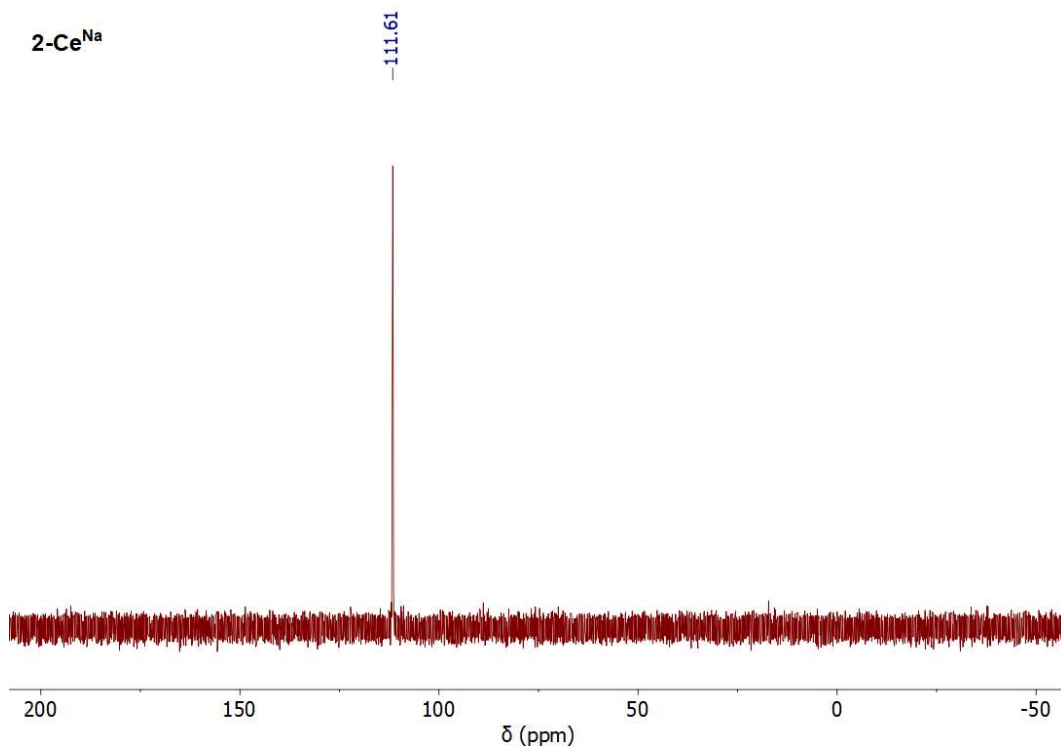

Figure S12.  $^{31}\text{P}\{^1\text{H}\}$  NMR of 2-Ce<sup>Na</sup> in C<sub>6</sub>D<sub>6</sub>.

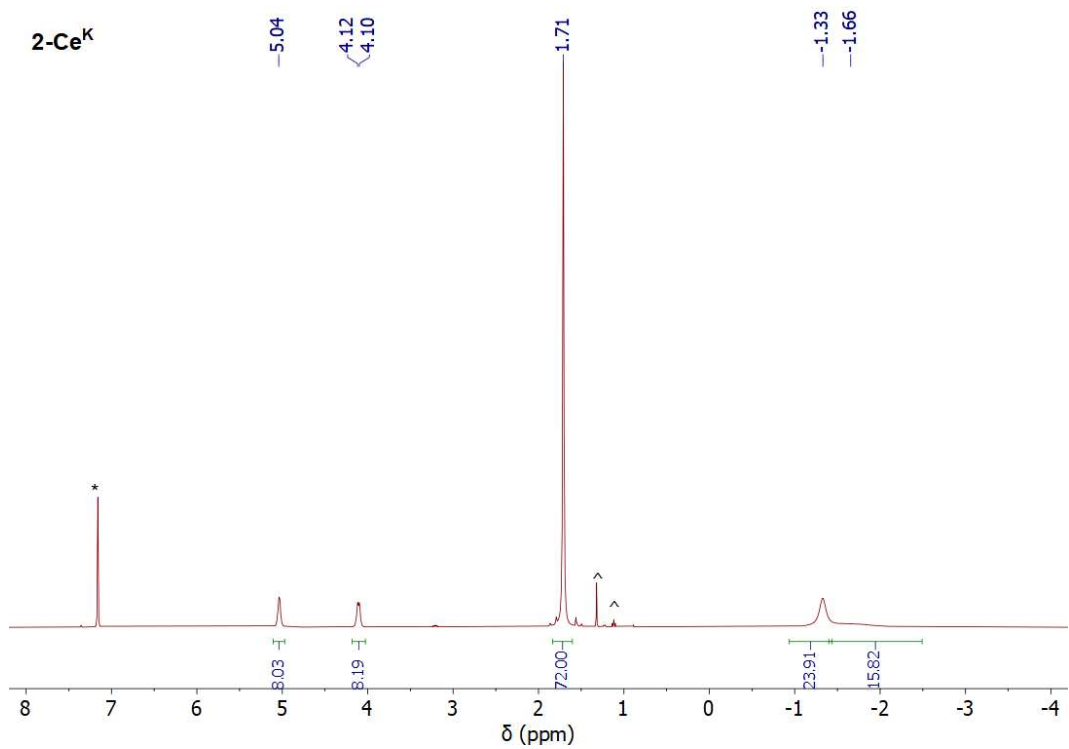

Figure S13. <sup>1</sup>H NMR of **2-Ce<sup>K</sup>** in C<sub>6</sub>D<sub>6</sub>. \* = C<sub>6</sub>D<sub>5</sub>H, ^ = hexane.

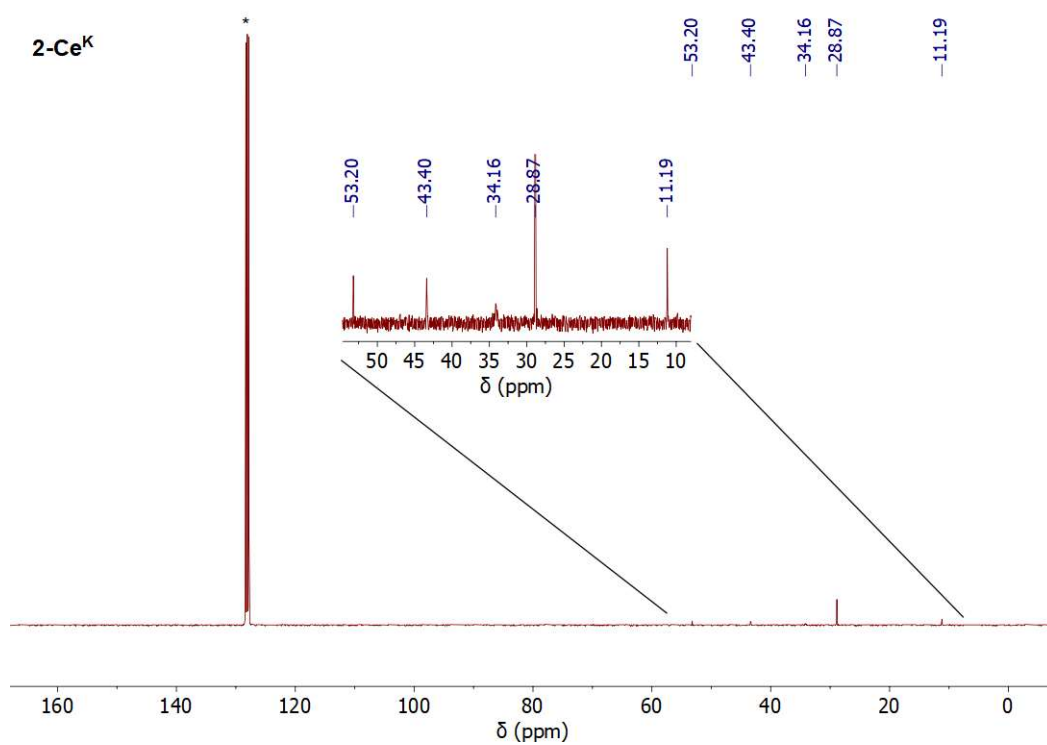

Figure S14. <sup>13</sup>C{<sup>1</sup>H} NMR of **2-Ce<sup>K</sup>** in C<sub>6</sub>D<sub>6</sub>.

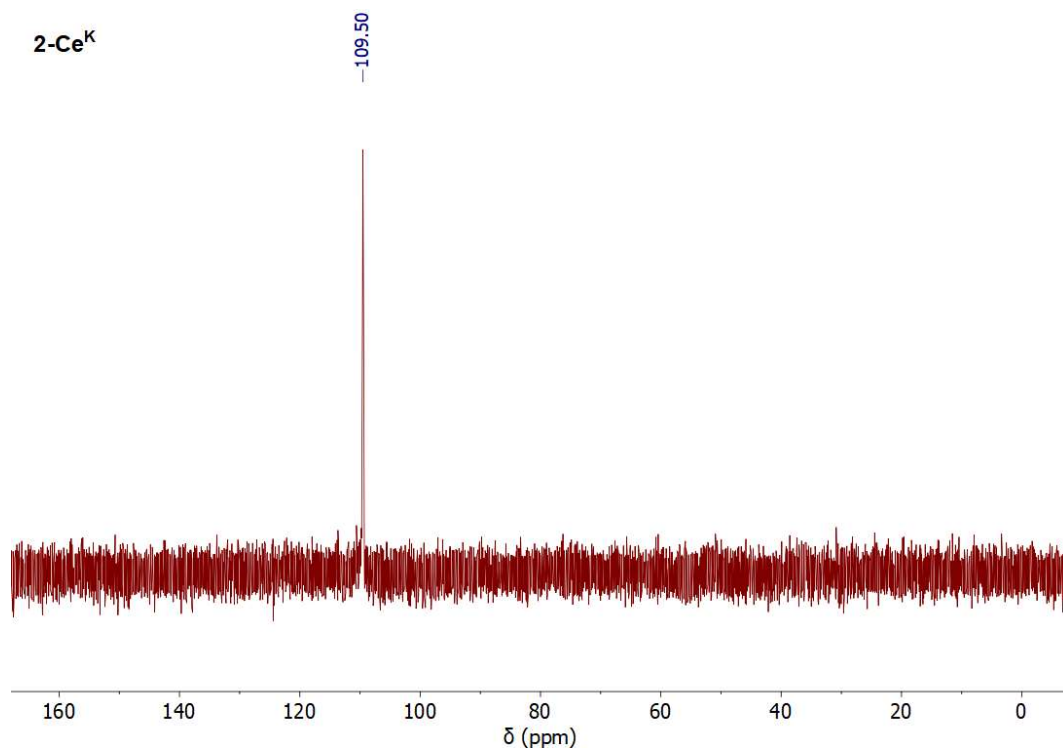

Figure S15. <sup>31</sup>P{<sup>1</sup>H} NMR of 2-Ce<sup>K</sup> in C<sub>6</sub>D<sub>6</sub>.

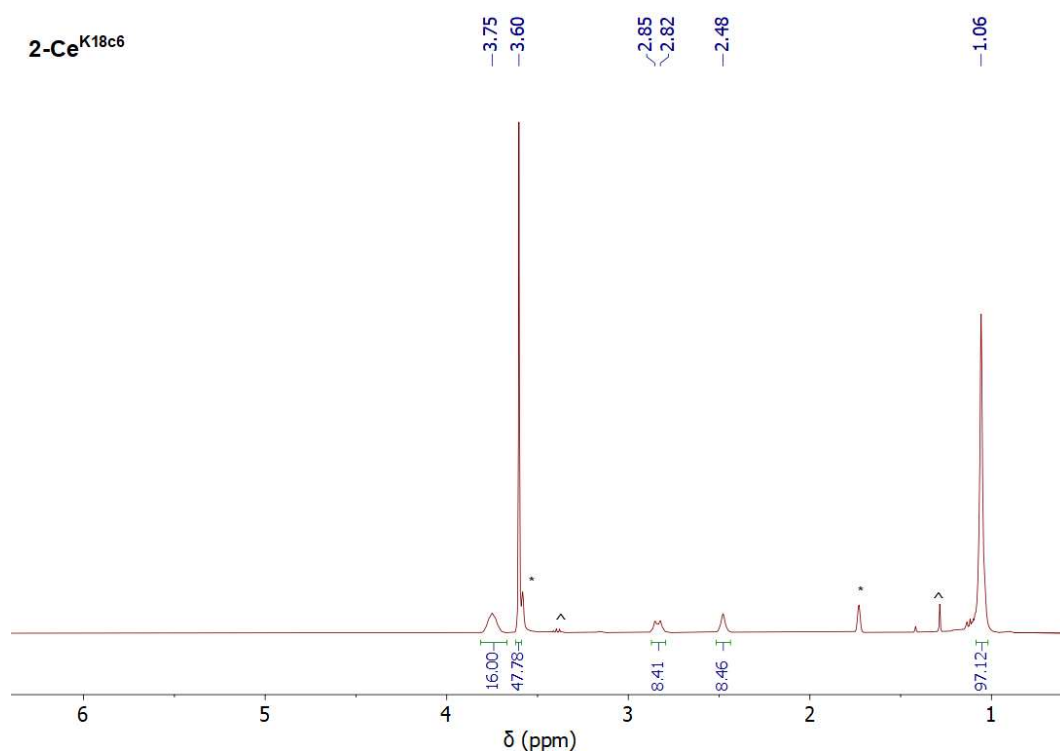

Figure S16. <sup>1</sup>H NMR of 2-Ce<sup>K18c6</sup> in THF-d<sub>8</sub>. \* = THF-d<sub>7</sub>, ^ = Et<sub>2</sub>O.

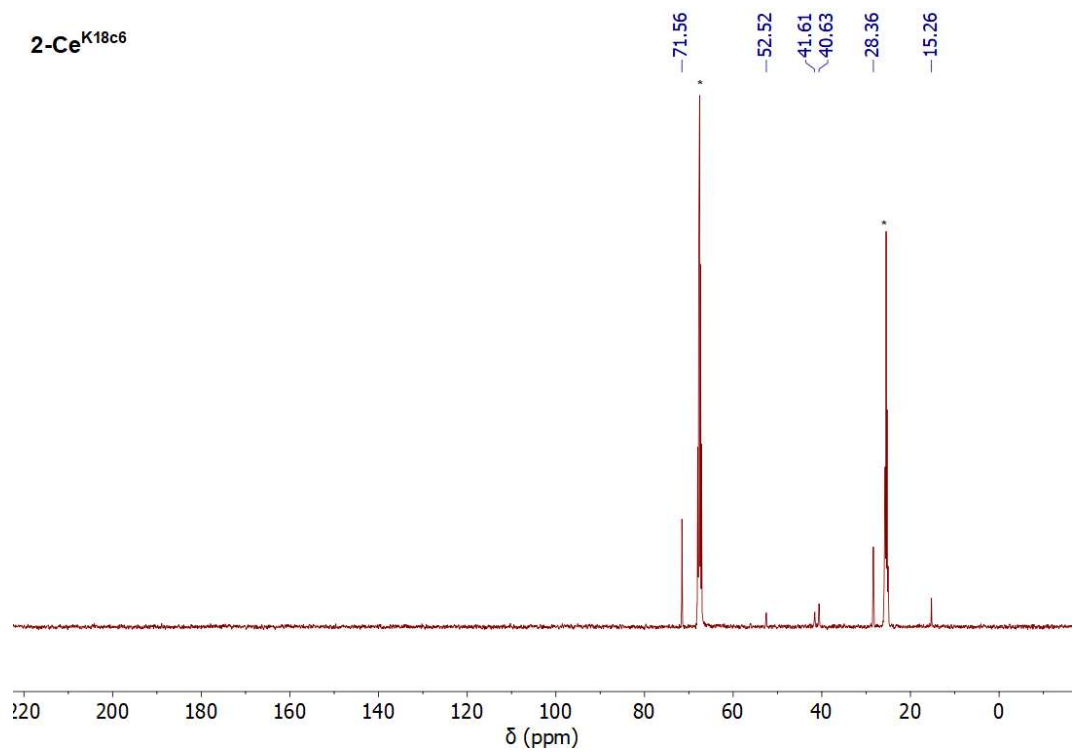

**Figure S17.**  $^{13}\text{C}\{^1\text{H}\}$  NMR of **2-Ce<sup>K18c6</sup>** in THF- $\text{d}_8$ . \* = THF- $\text{d}_8$ .

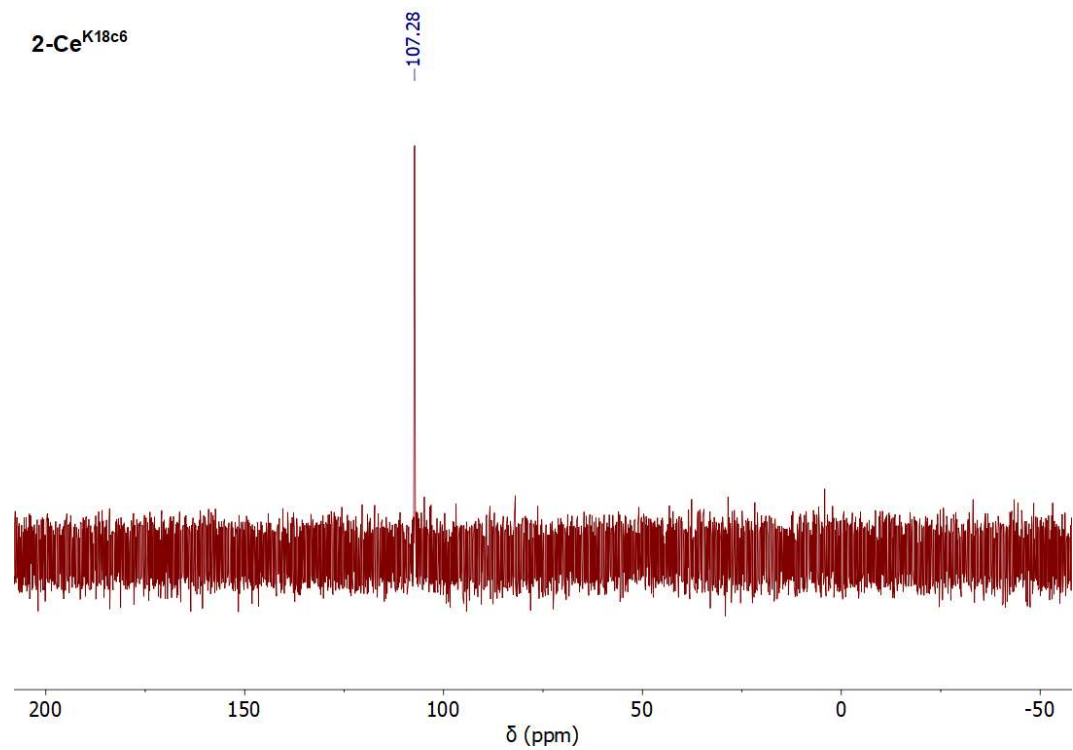

**Figure S18.**  $^{31}\text{P}\{^1\text{H}\}$  NMR of **2-Ce<sup>K18c6</sup>** in THF- $\text{d}_8$ .

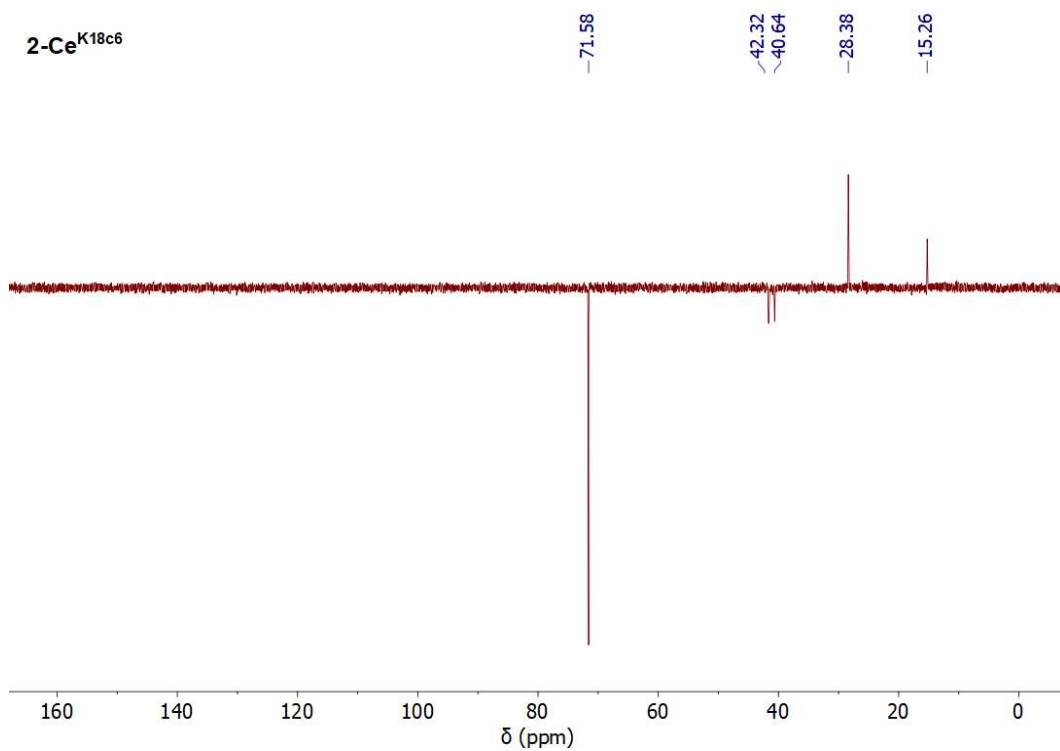

Figure S19. <sup>13</sup>C DEPT-135 NMR of 2-Ce<sup>K18c6</sup> in THF-d<sub>8</sub>.

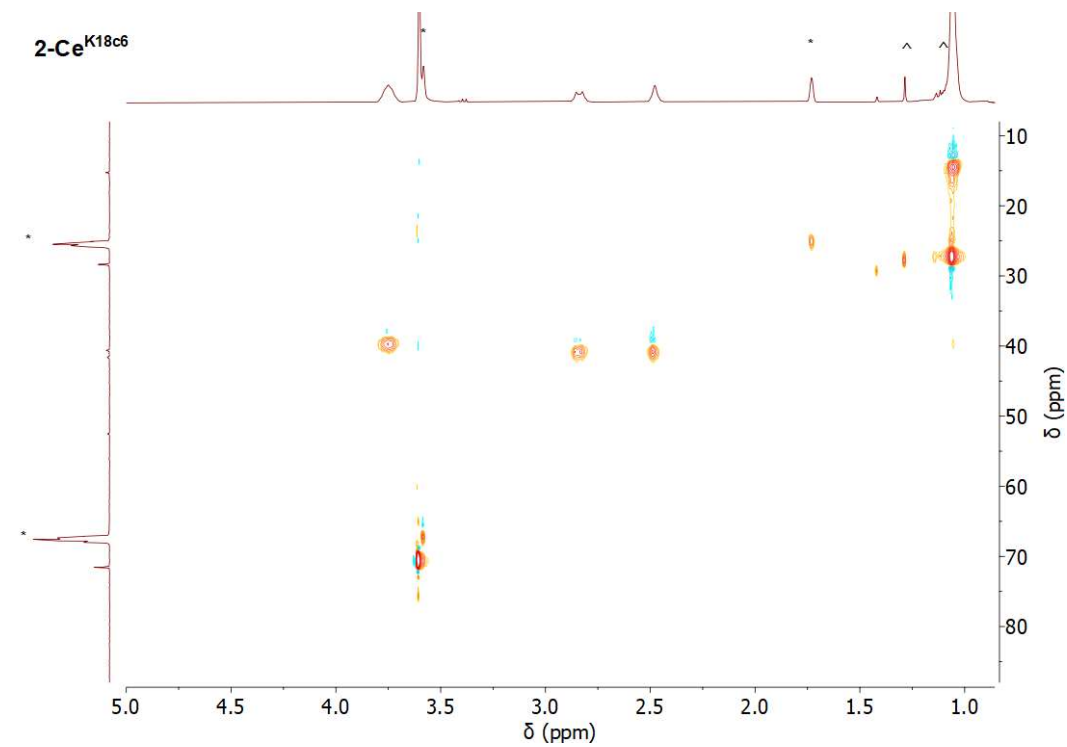

Figure S20. <sup>1</sup>H-<sup>13</sup>C HSQC NMR of 2-Ce<sup>K18c6</sup> in THF-d<sub>8</sub>. Note: the <sup>1</sup>H signal at 1.06 ppm is shown to be composed of two signals overlapping, assigned as the N-<sup>t</sup>Bu protons and the N-CH<sub>2</sub>-CH<sub>3</sub> protons. \* = THF-d<sub>8</sub> ^ = *n*-pentane, H grease.



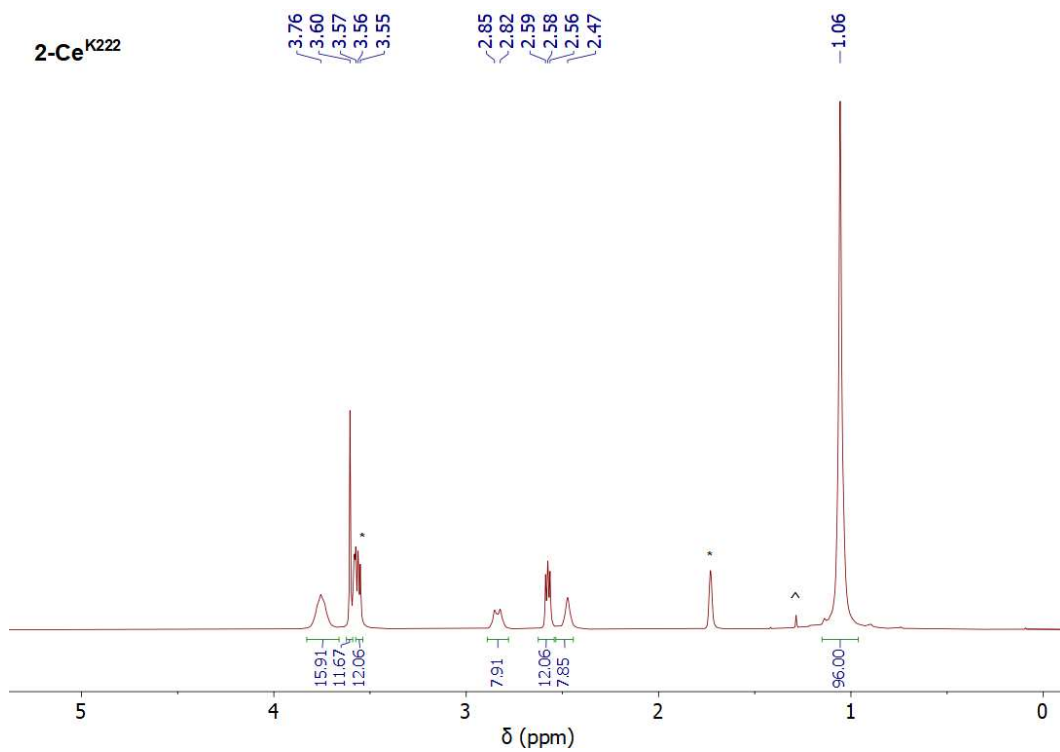

Figure S21. <sup>1</sup>H NMR of 2-Ce<sup>K222</sup> in THF-d<sub>8</sub>. \* = THF-d<sub>7</sub>, ^ = H grease.

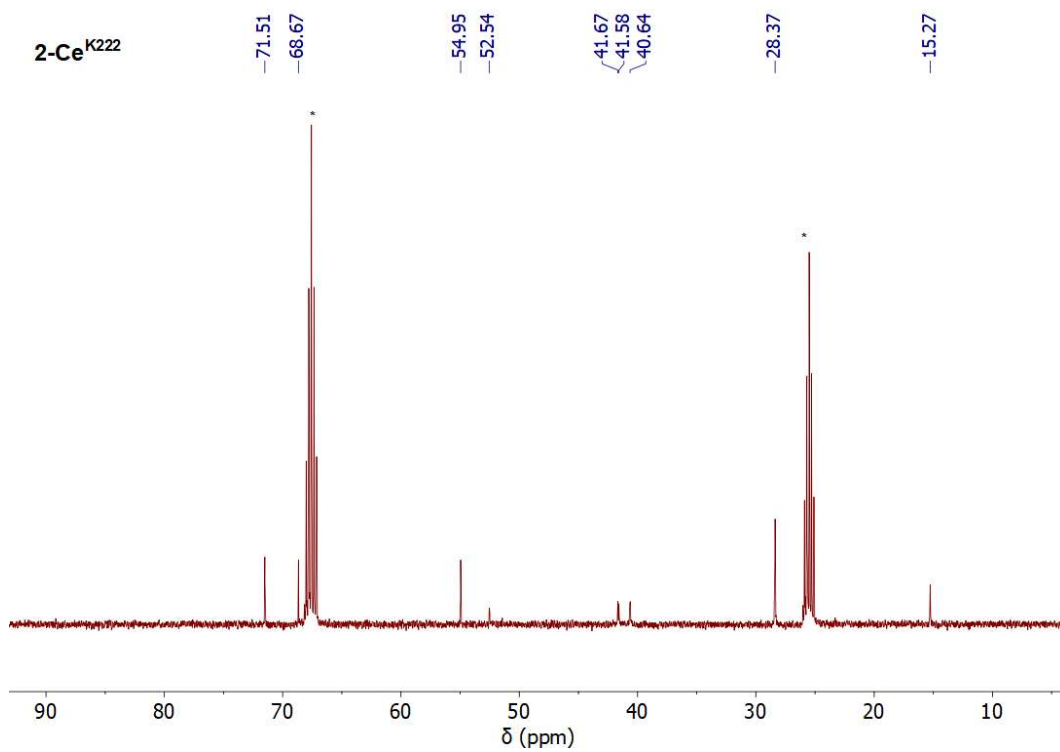

Figure S22. <sup>13</sup>C{<sup>1</sup>H} NMR of 2-Ce<sup>K222</sup> in THF-d<sub>8</sub>. \* = THF-d<sub>8</sub>.

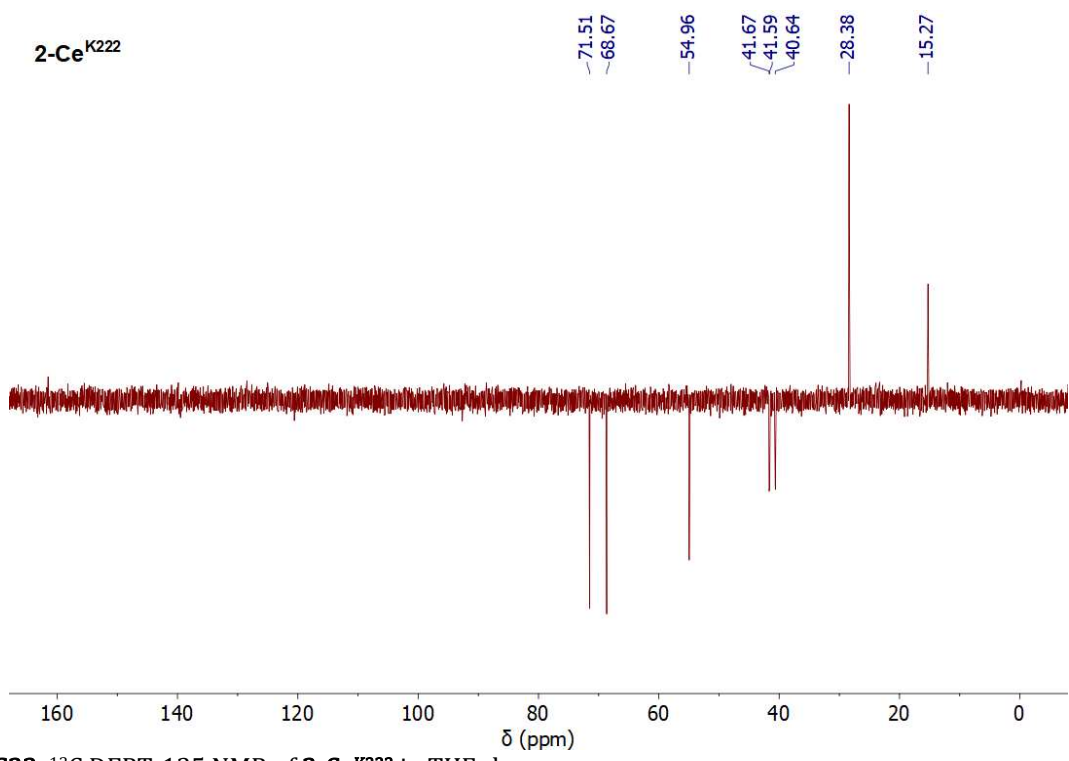

Figure S23. <sup>13</sup>C DEPT-135 NMR of 2-Ce<sup>K222</sup> in THF-d<sub>8</sub>.

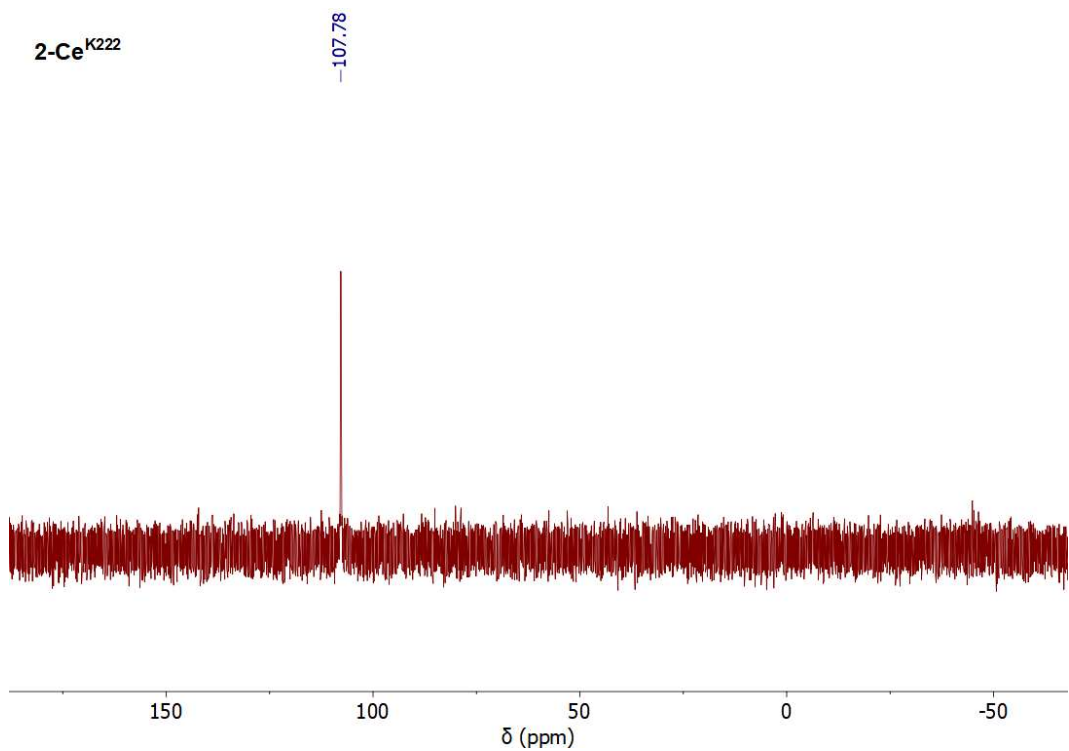

Figure S24. <sup>31</sup>P{<sup>1</sup>H} NMR of 2-Ce<sup>K222</sup> in THF-d<sub>8</sub>.

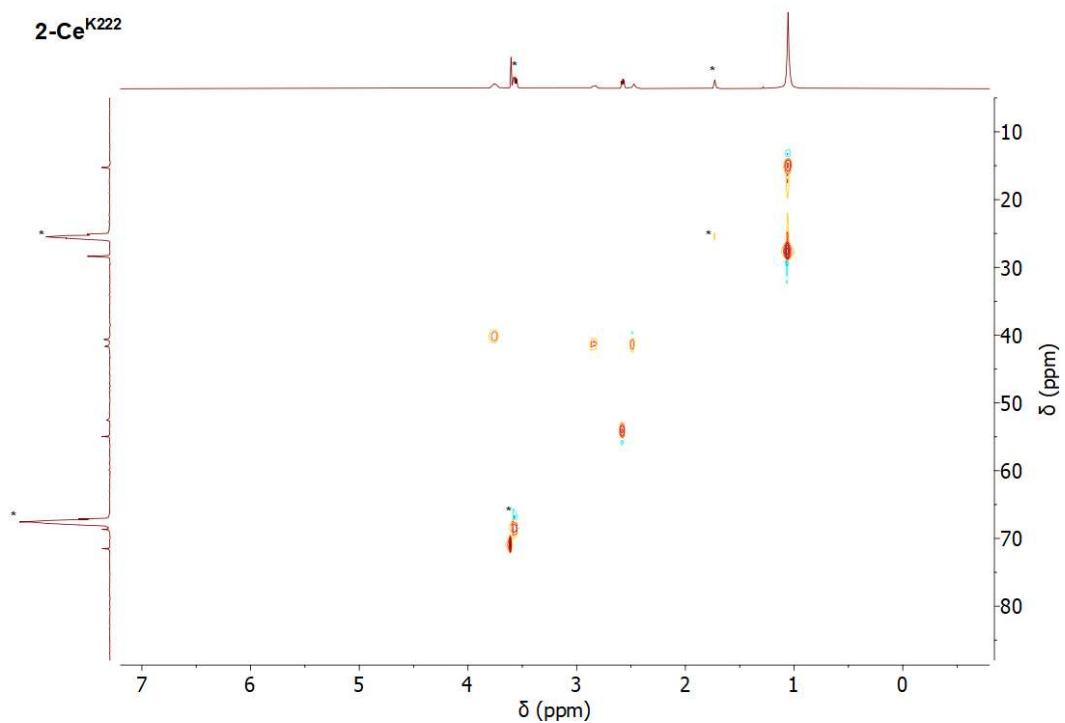

**Figure S25.**  $^1\text{H}$ - $^{13}\text{C}$  NMR of **2-Ce<sup>K222</sup>** in  $\text{THF-d}_8$ . Notably, the  $^1\text{H}$  signal at 1.06 ppm is shown to be composed of two signals overlapping, assigned as the N-Bu protons and the N- $\text{CH}_2\text{-CH}_3$  protons \* =  $\text{THF-d}_8$ .

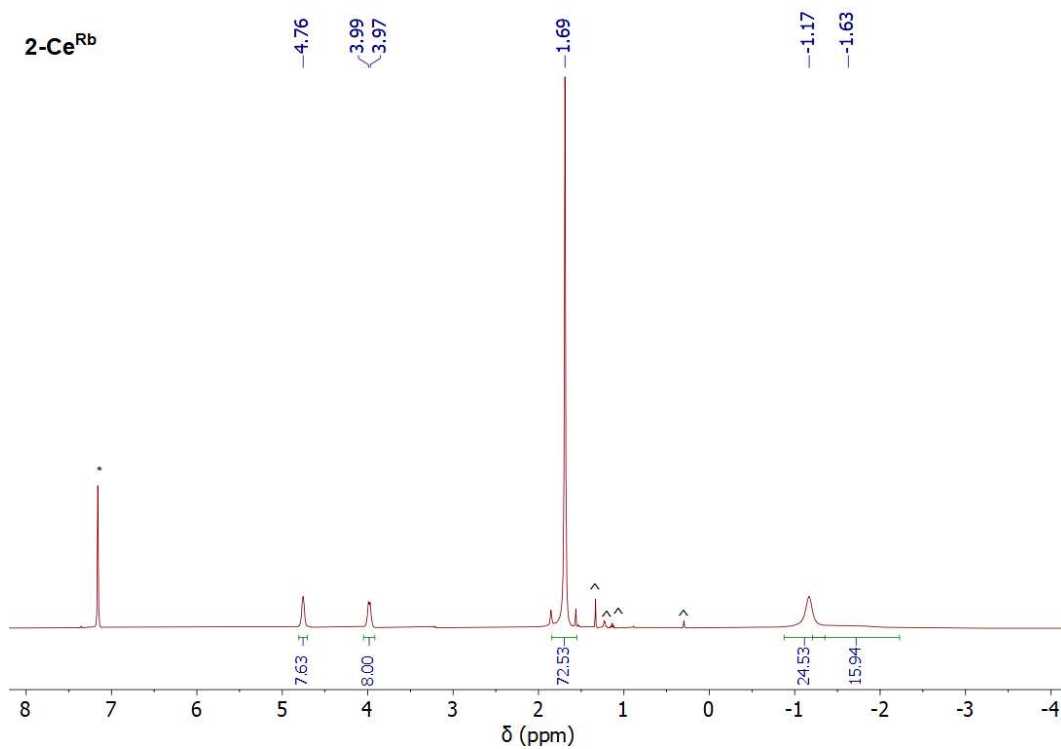

**Figure S26.**  $^1\text{H}$  NMR of **2-Ce<sup>Rb</sup>** in  $\text{C}_6\text{D}_6$ . \* =  $\text{C}_6\text{D}_5\text{H}$ , ^ = *n*-pentane,  $\text{Et}_2\text{O}$ , silicone grease.

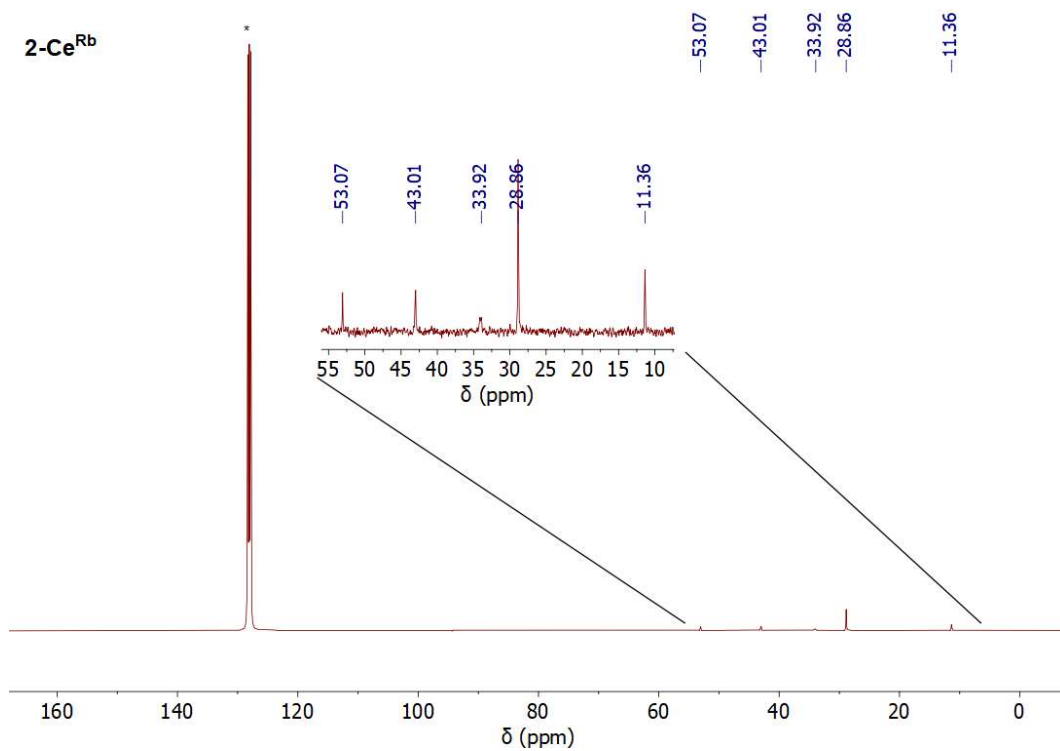

**Figure S27.**  $^{13}\text{C}\{^1\text{H}\}$  NMR of **2-Ce<sup>Rb</sup>** in  $\text{C}_6\text{D}_6$ . \* =  $\text{C}_6\text{D}_6$ .

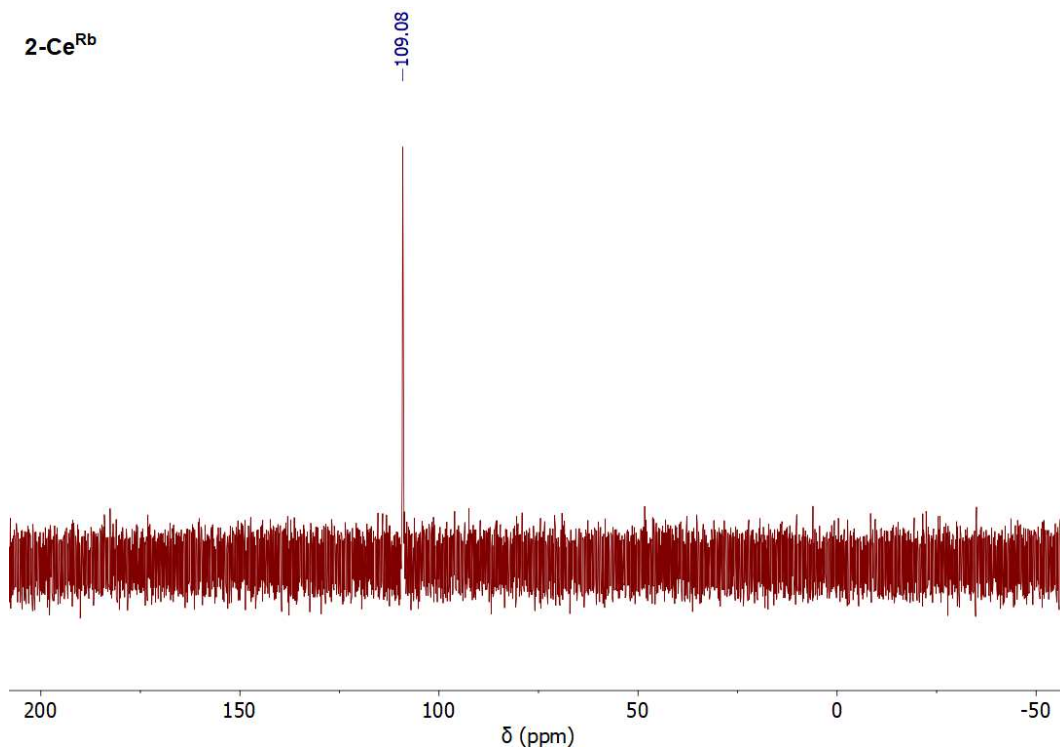

**Figure S28.**  $^{31}\text{P}\{^1\text{H}\}$  NMR of **2-Ce<sup>Rb</sup>** in  $\text{C}_6\text{D}_6$ .

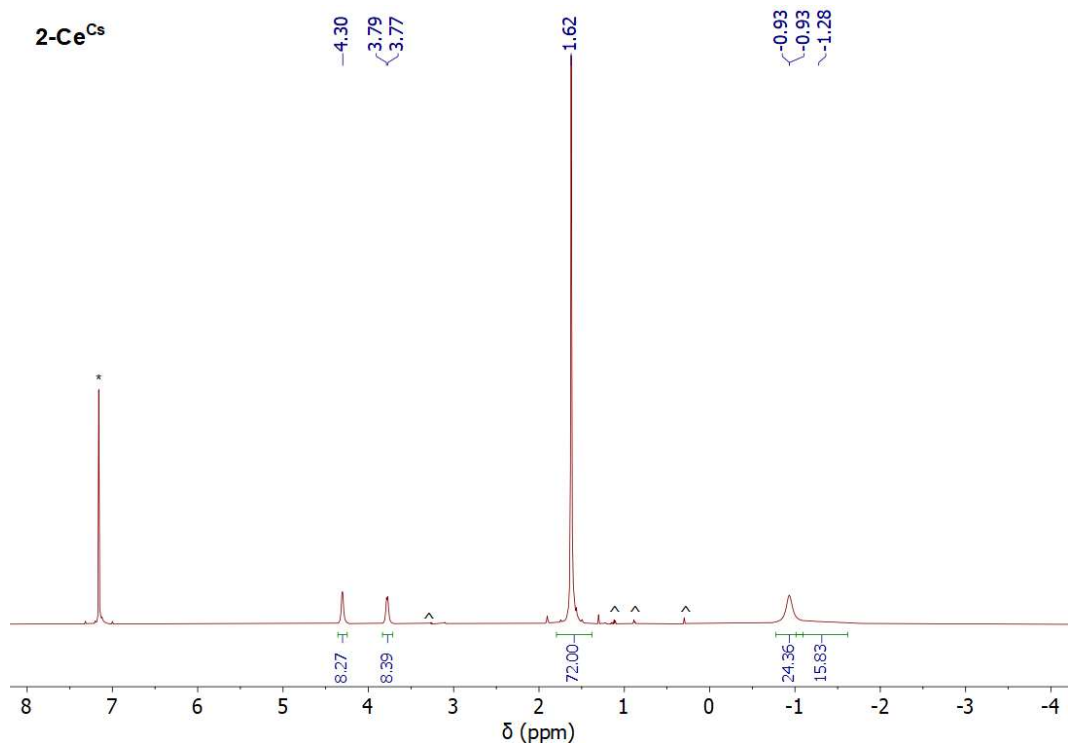

Figure S29. <sup>1</sup>H NMR of 2-Ce<sup>Cs</sup> in C<sub>6</sub>D<sub>6</sub>. \* = C<sub>6</sub>D<sub>5</sub>H, ^ = *n*-pentane, silicone grease.

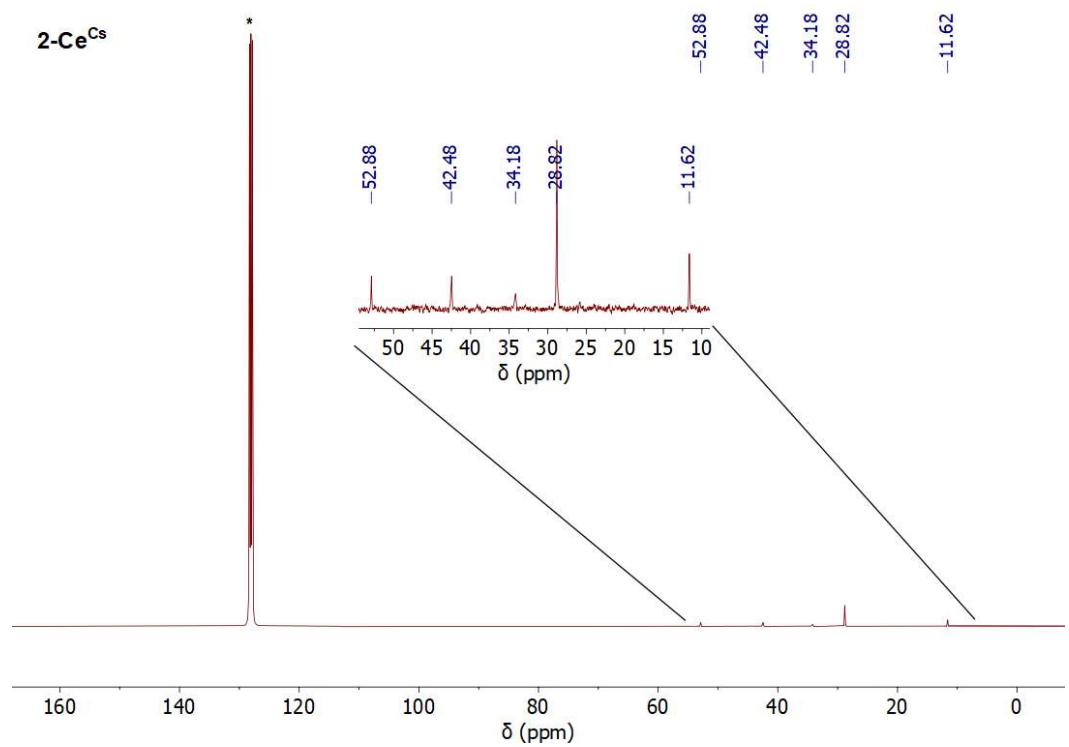

Figure S30. <sup>13</sup>C{<sup>1</sup>H} NMR of 2-Ce<sup>Cs</sup> in C<sub>6</sub>D<sub>6</sub>. \* = C<sub>6</sub>D<sub>6</sub>.

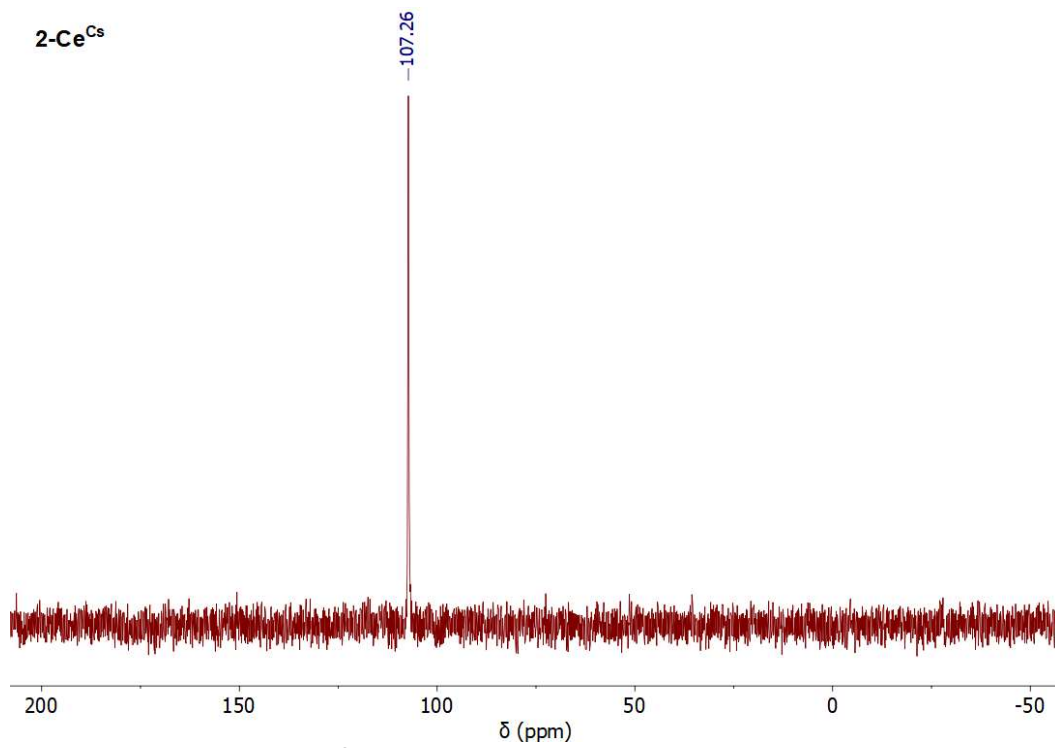

**Figure S31.**  $^{31}\text{P}\{^1\text{H}\}$  NMR of  $2\text{-Ce}^{\text{Cs}}$  in  $\text{C}_6\text{D}_6$ .

### Variable-Temperature NMR Spectra

General procedure: Samples were transferred to an NMR tube fitted with a J. Young tap, then inserted into the spectrometer at room temperature and subsequently cooled to  $-80^{\circ}\text{C}$ . Spectra presented were sequentially measured with temperature increasing from low to high temperatures. Temperatures were corrected using a methanol calibration curve, and intermittently verified during the experiment using an external methanol calibration standard. The compounds reported herein are extremely sensitive to adventitious  $\text{O}_2/\text{H}_2\text{O}$ ; upon cooling, generation of small amounts of HNP\* and **1-Ce** is sometimes observed due to weakening of the Teflon/glass J. Young tap seal.

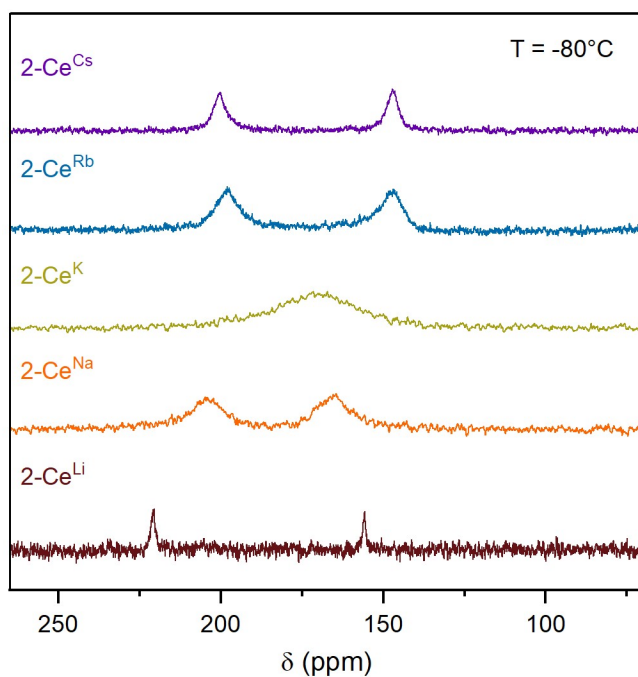

**Figure S32.** Low-temperature  $^{31}\text{P}\{^1\text{H}\}$  NMR at  $-80^{\circ}\text{C}$  in toluene- $d_6$

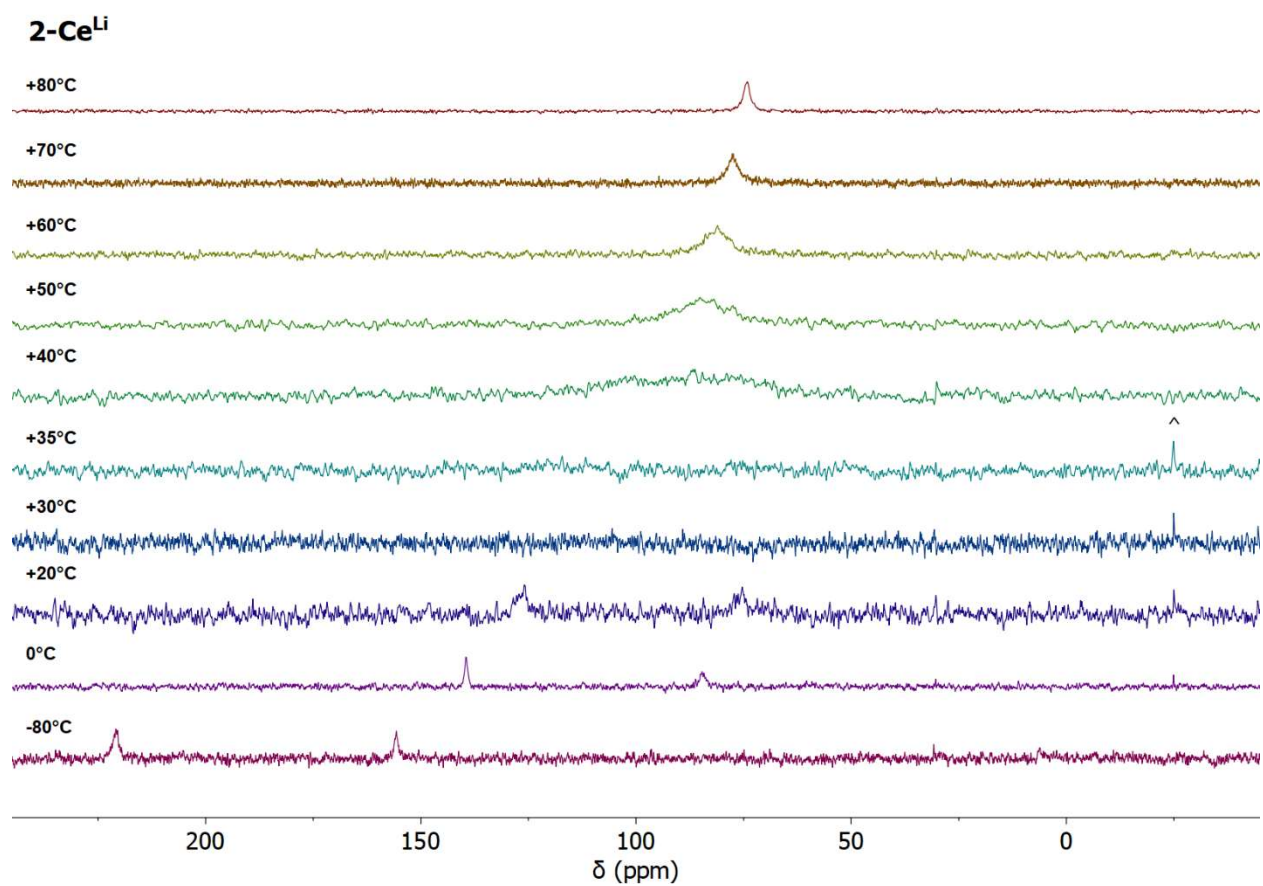

Figure S33. Variable-Temperature  $^{31}\text{P}\{^1\text{H}\}$  NMR of **2-Ce<sup>Li</sup>** in  $\text{tol-d}_8$ .  $\wedge = \mathbf{1-Ce}$ .



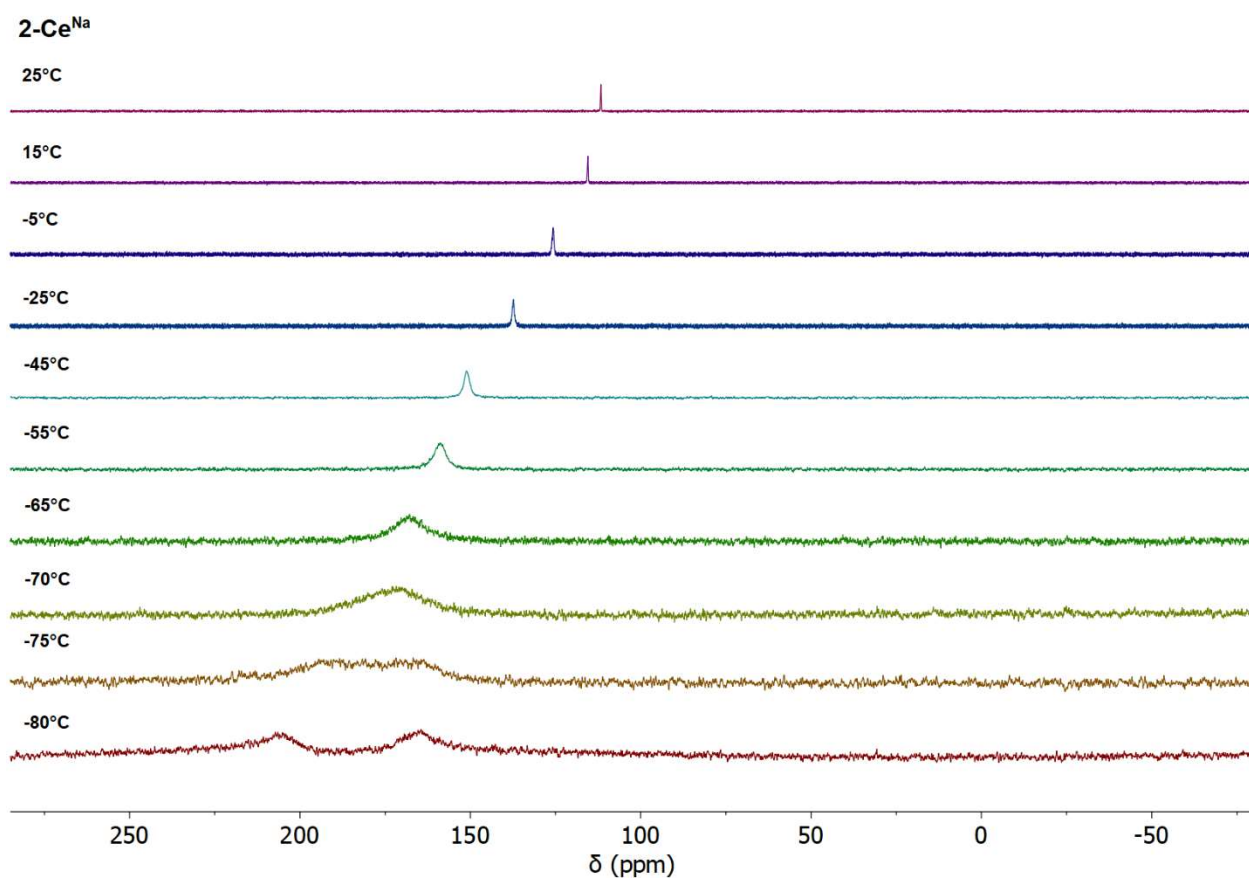

**Figure S34.** Variable-Temperature  $^{31}\text{P}\{^1\text{H}\}$  NMR of **2-Ce<sup>Na</sup>** in tol- $d_8$ .

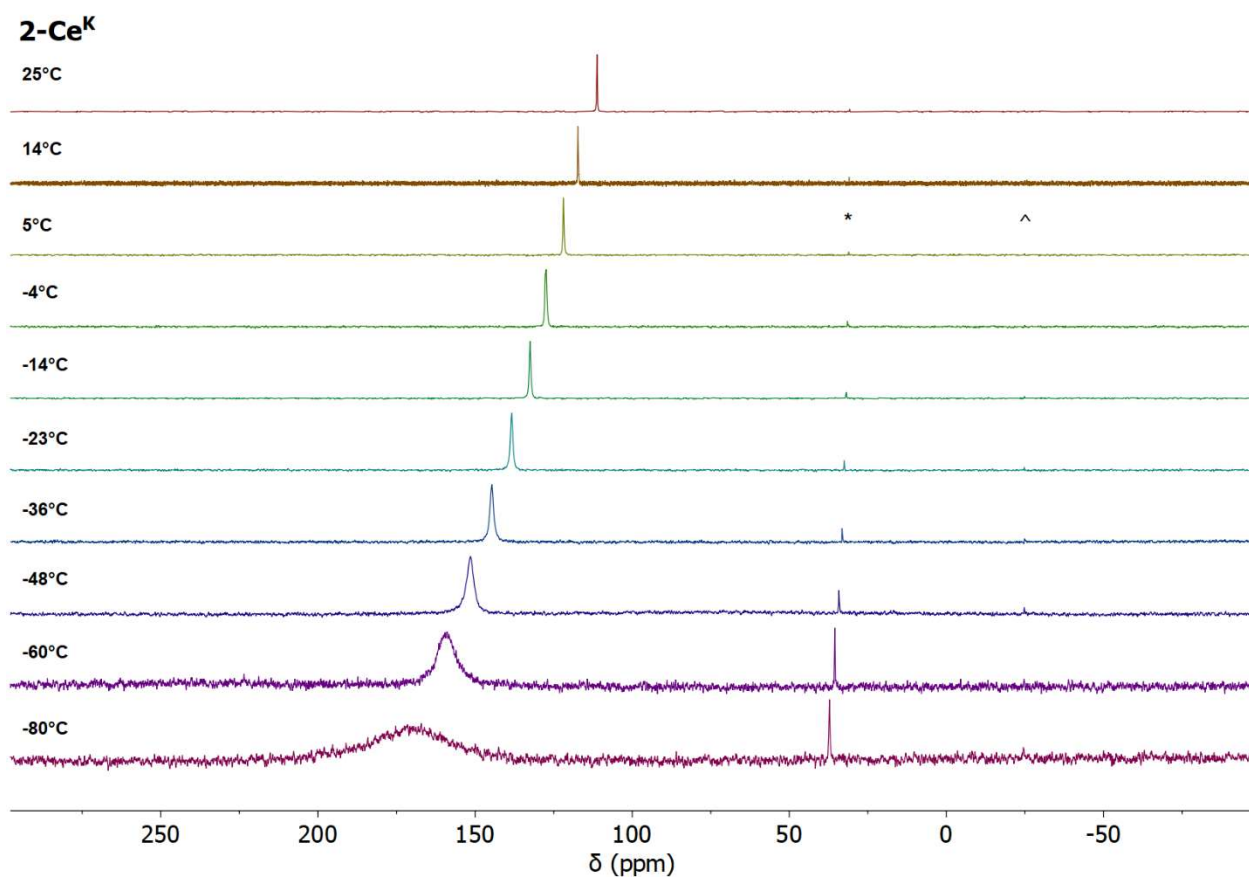

Figure S35. Variable-Temperature  $^{31}\text{P}\{^1\text{H}\}$  NMR of **2-Ce<sup>K</sup>** in tol- $d_8$ . \* = HNP\*, ^ = **1-Ce**.

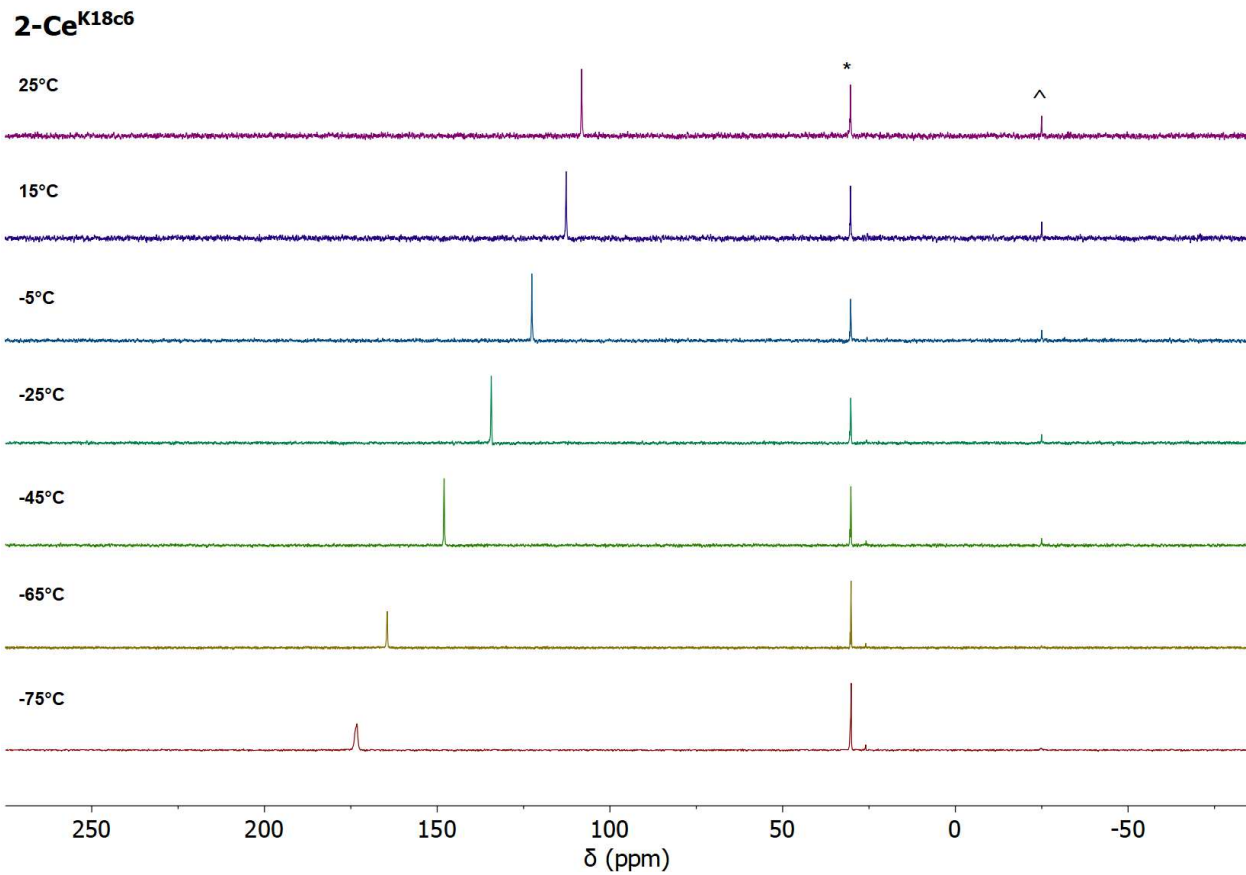

**Figure S36.** Variable-temperature  $^{31}\text{P}\{^1\text{H}\}$  NMR of **2-Ce<sup>K18c6</sup>** in THF- $d_8$ . \* = HNP\*, ^ = **1-Ce**.

**2-Ce<sup>Rb</sup>**

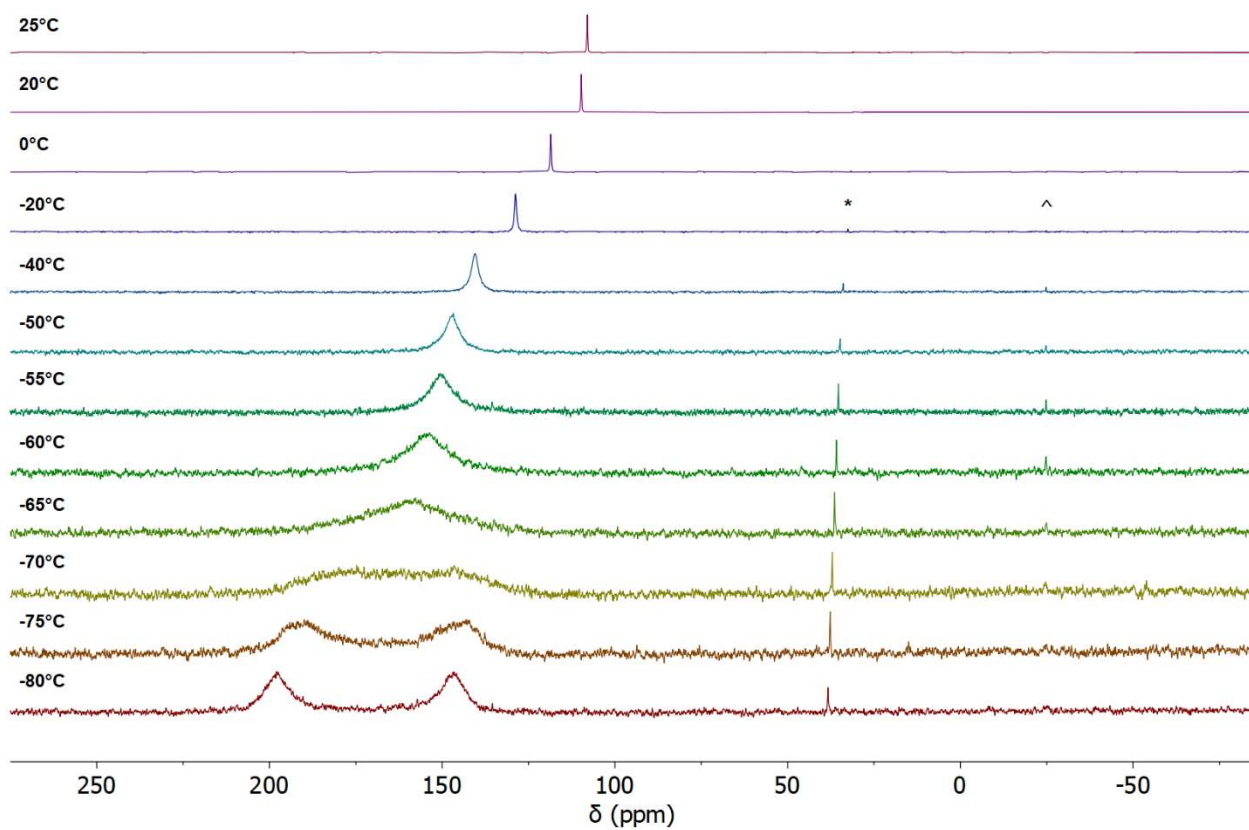

**Figure S37.** Variable-temperature <sup>31</sup>P{<sup>1</sup>H} NMR of 2-Ce<sup>Rb</sup>. \*= HNP\*, ^ = 1-Ce.

**2-Ce<sup>Cs</sup>**

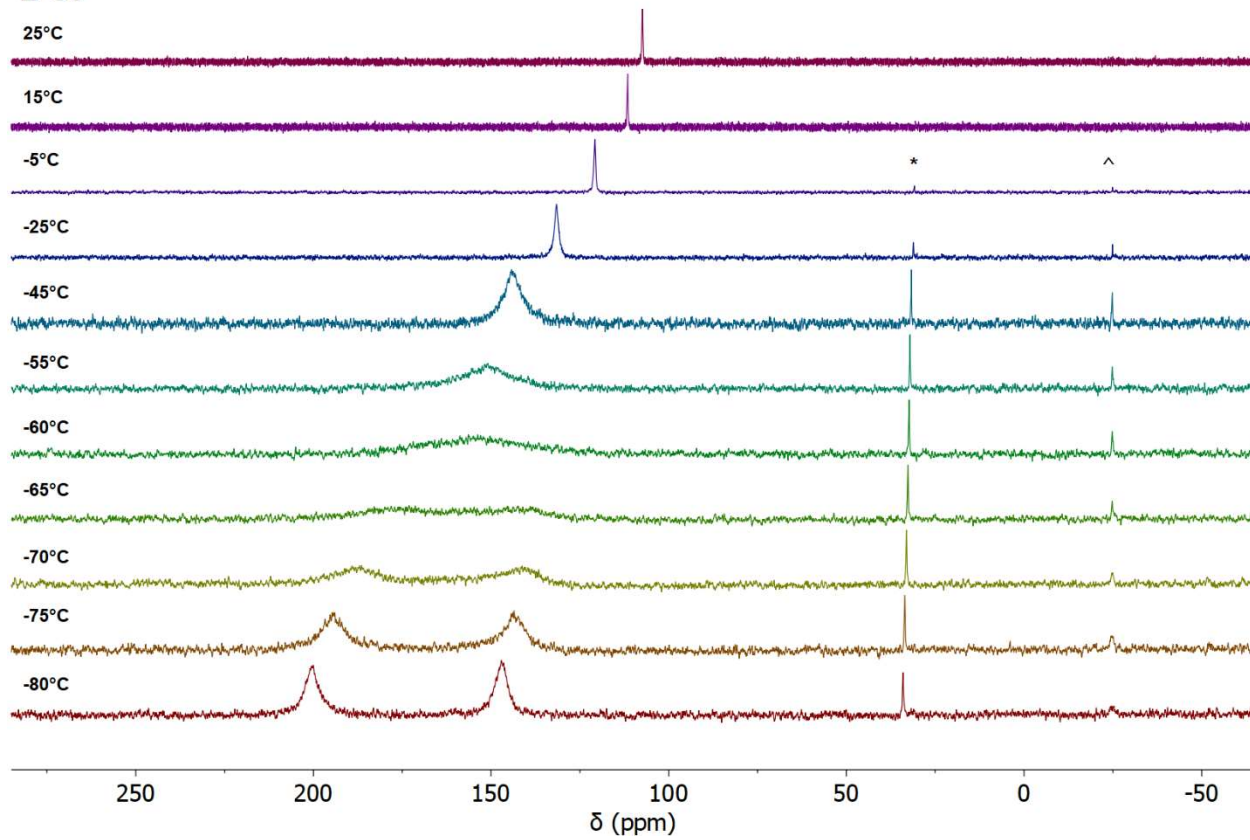

**Figure S38.** Variable-temperature <sup>31</sup>P{<sup>1</sup>H} NMR of 2-Ce<sup>Cs</sup>. \* = HNP\*, ^ = 1-Ce.

## UV-Vis-NIR Spectra

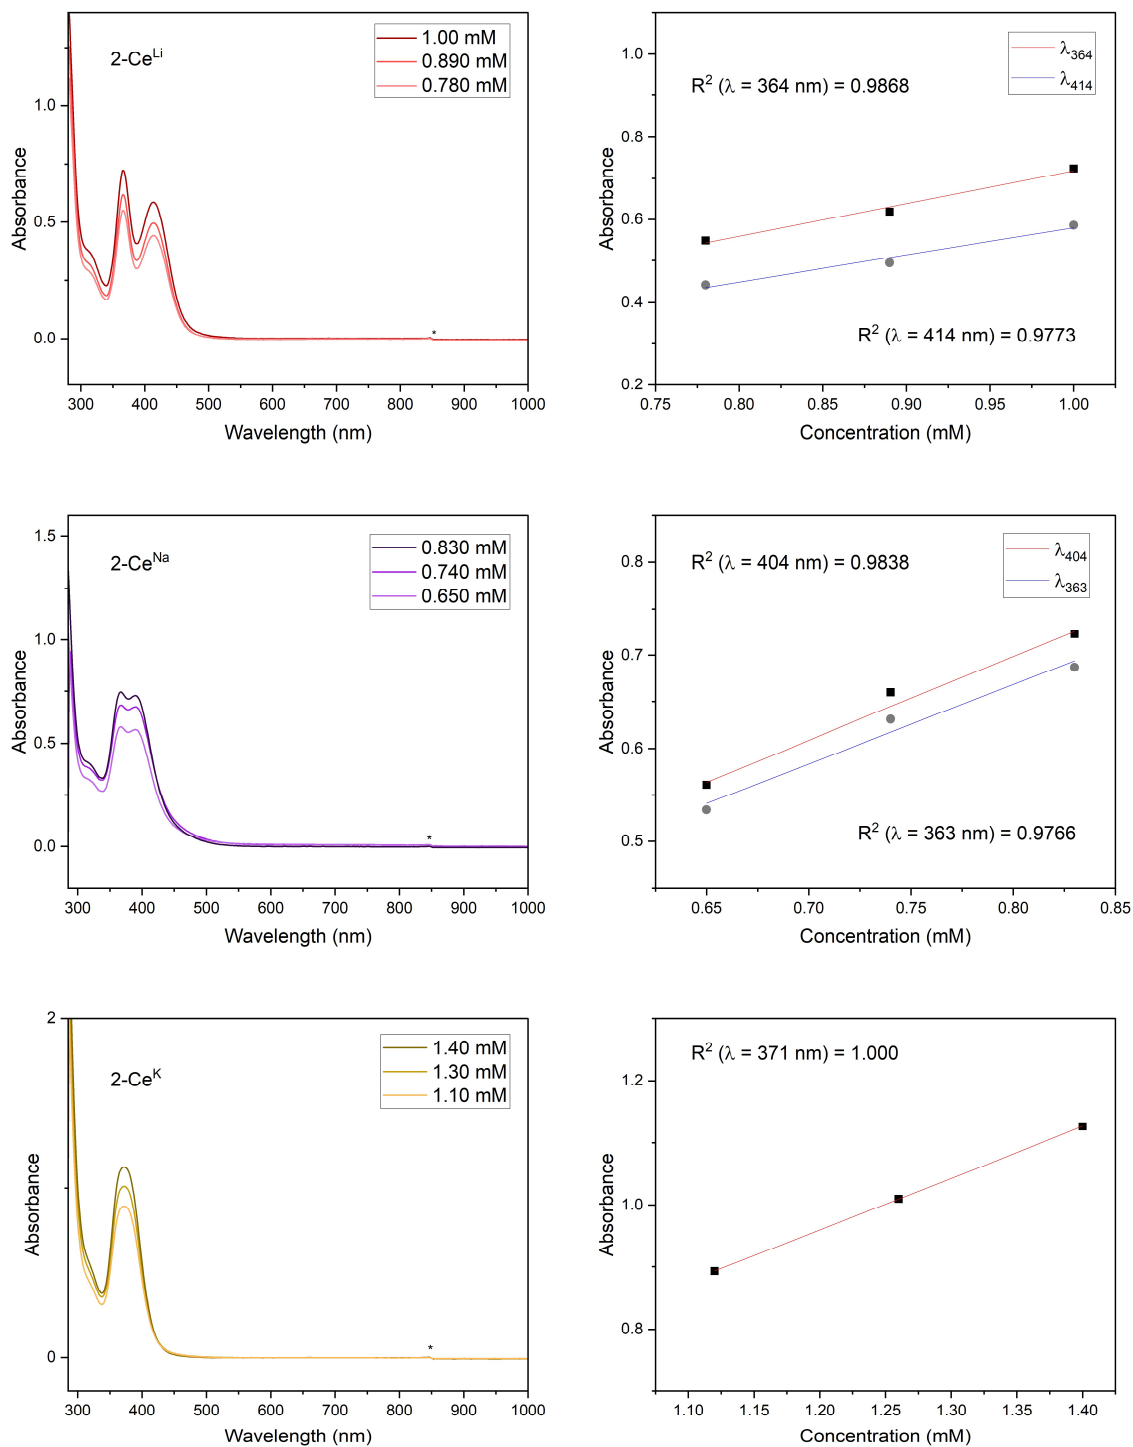

**Figure S39.** UV-Vis-NIR spectra at multiple concentrations (left) and linear regression analysis of absorbance at  $\lambda_{\max}$  (right) for **2-Ce<sup>Li</sup>** (top), **2-Ce<sup>Na</sup>** (middle), **2-Ce<sup>K</sup>** (bottom) in toluene.

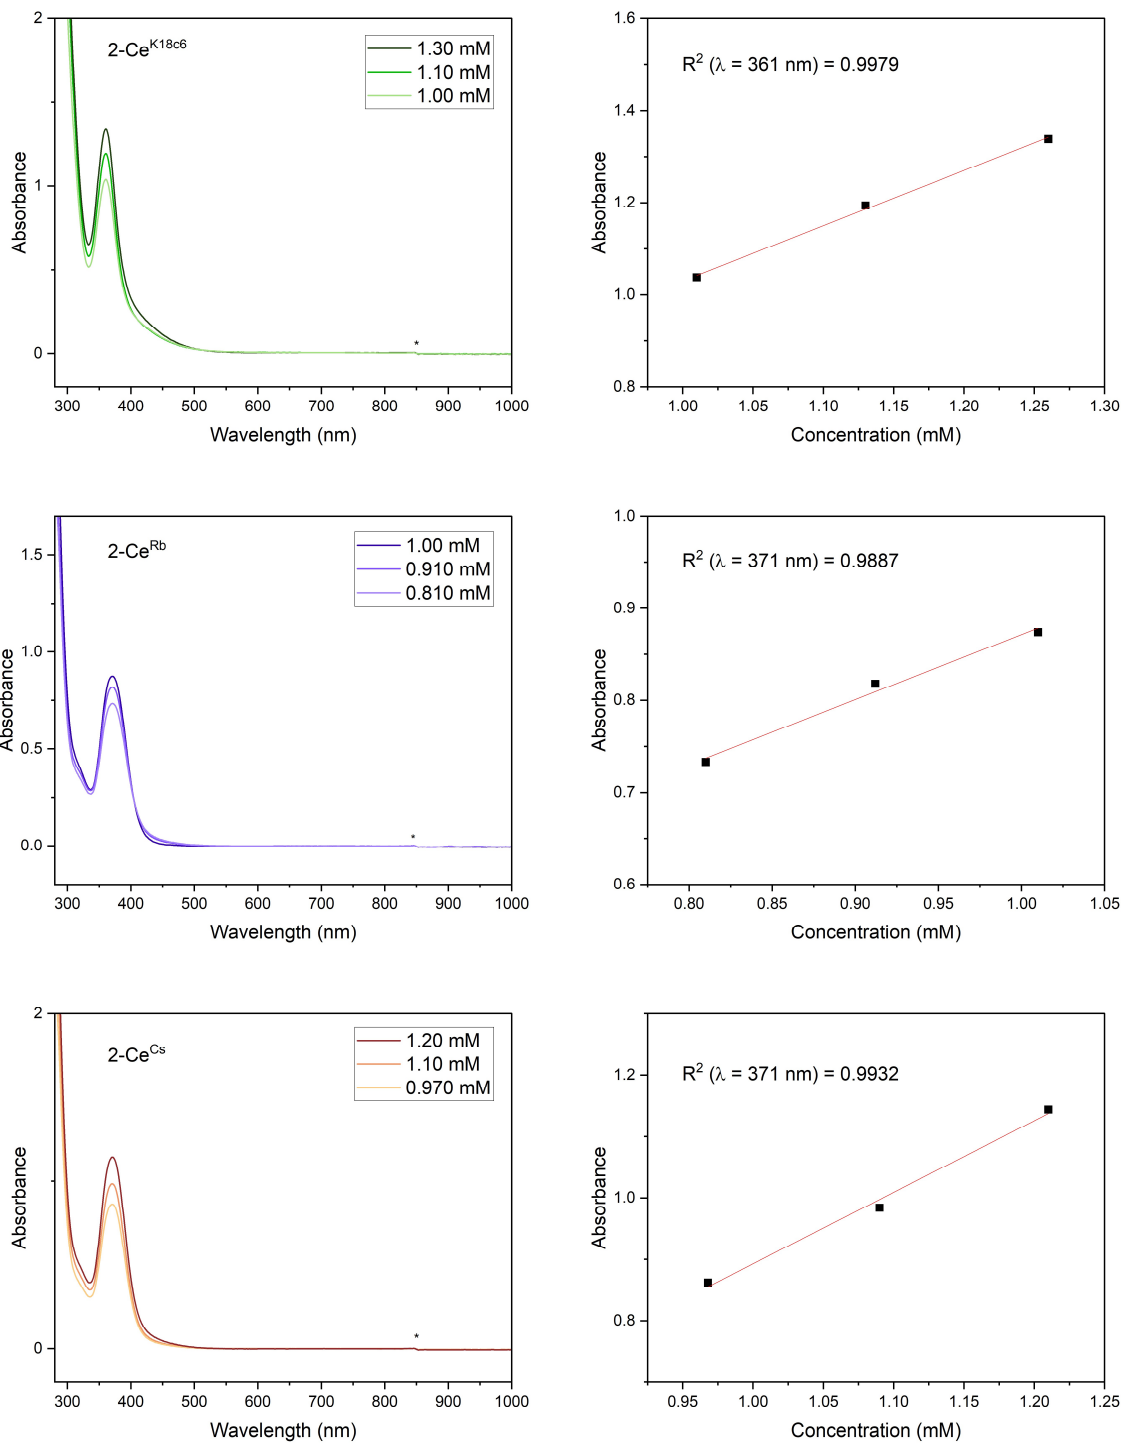

**Figure S40.** UV-Vis-NIR spectra at multiple concentrations (left) and linear regression analysis of absorbance at  $\lambda_{\text{max}}$  (right) for **2-Ce<sup>K18c6</sup>** in THF (top), **2-Ce<sup>Rb</sup>** (middle) and **2-Ce<sup>Cs</sup>** (bottom) in toluene.

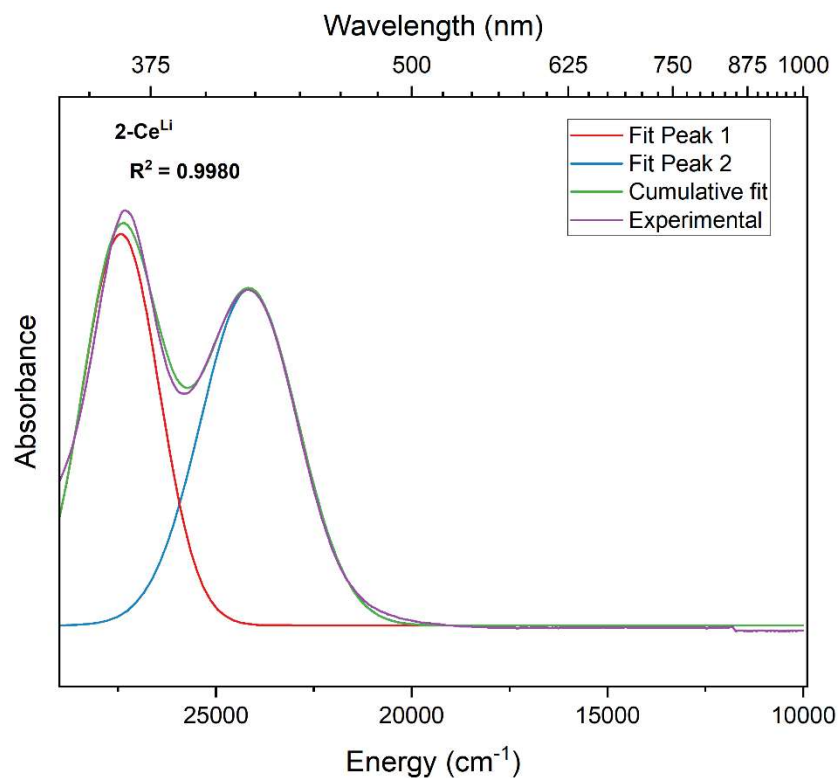

**Figure S41.** Gaussian fitting of UV-Vis-NIR spectrum of **2-Ce<sup>Li</sup>** in toluene.

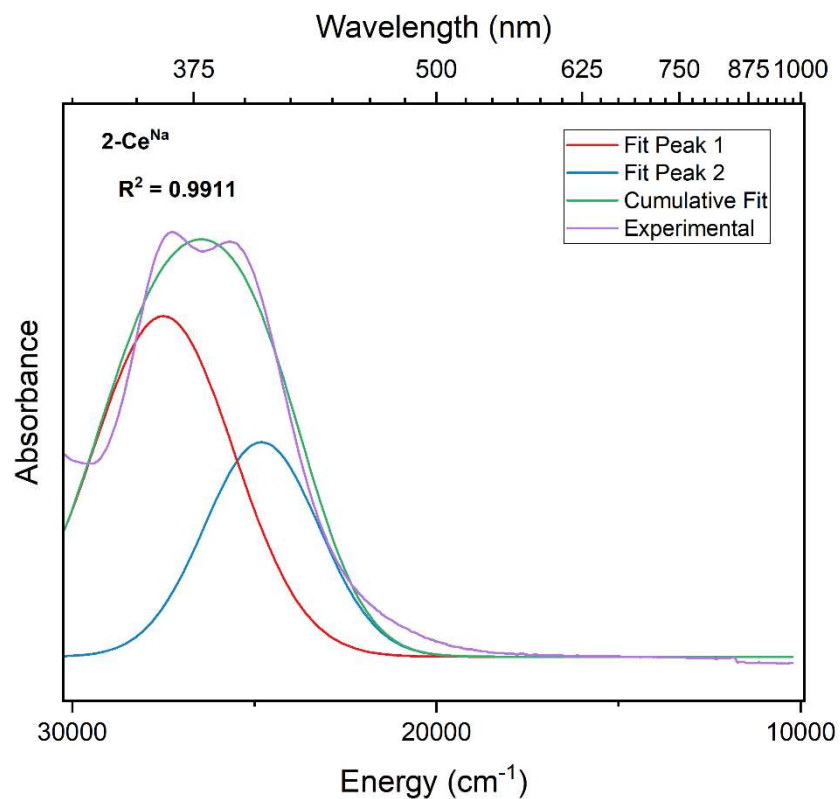

**Figure S42.** Gaussian fitting of UV-Vis-NIR spectrum of **2-Ce<sup>Na</sup>** in toluene. Note: A satisfactory fit for this spectrum is complicated by large features on the edge of the UV window, in addition to trace amounts of highly absorbing **1-Ce**. Rather than over-parametrizing, a crude fit is presented showing two features present.



**Table S1.** Tabulated UV-Vis parameters.

|                                                  | 2-Ce <sup>Li</sup> | 2-Ce <sup>Na</sup> | 2-Ce <sup>K</sup> | 2-Ce <sup>K18c6</sup> | 2-Ce <sup>Rb</sup> | 2-Ce <sup>Cs</sup> |
|--------------------------------------------------|--------------------|--------------------|-------------------|-----------------------|--------------------|--------------------|
| $\lambda$<br>(nm)                                | 363                | 360                | 371               | 361                   | 371                | 371                |
| $\epsilon$<br>(M <sup>1</sup> cm <sup>-1</sup> ) | 800                | 900                | 800               | 1000                  | 700                | 1000               |
| FWHM<br>(eV)                                     | 0.27               | 0.15               | 0.45              | 0.45                  | 0.64               | 0.43               |
| $\lambda$ (nm)                                   | 414                | 393                | -                 | -                     | -                  | -                  |
| $\epsilon$<br>(M <sup>1</sup> cm <sup>-1</sup> ) | 700                | 700                | -                 | -                     | -                  | -                  |
| FWHM<br>(eV)                                     | 0.39               | 0.68               | -                 | -                     | -                  | -                  |

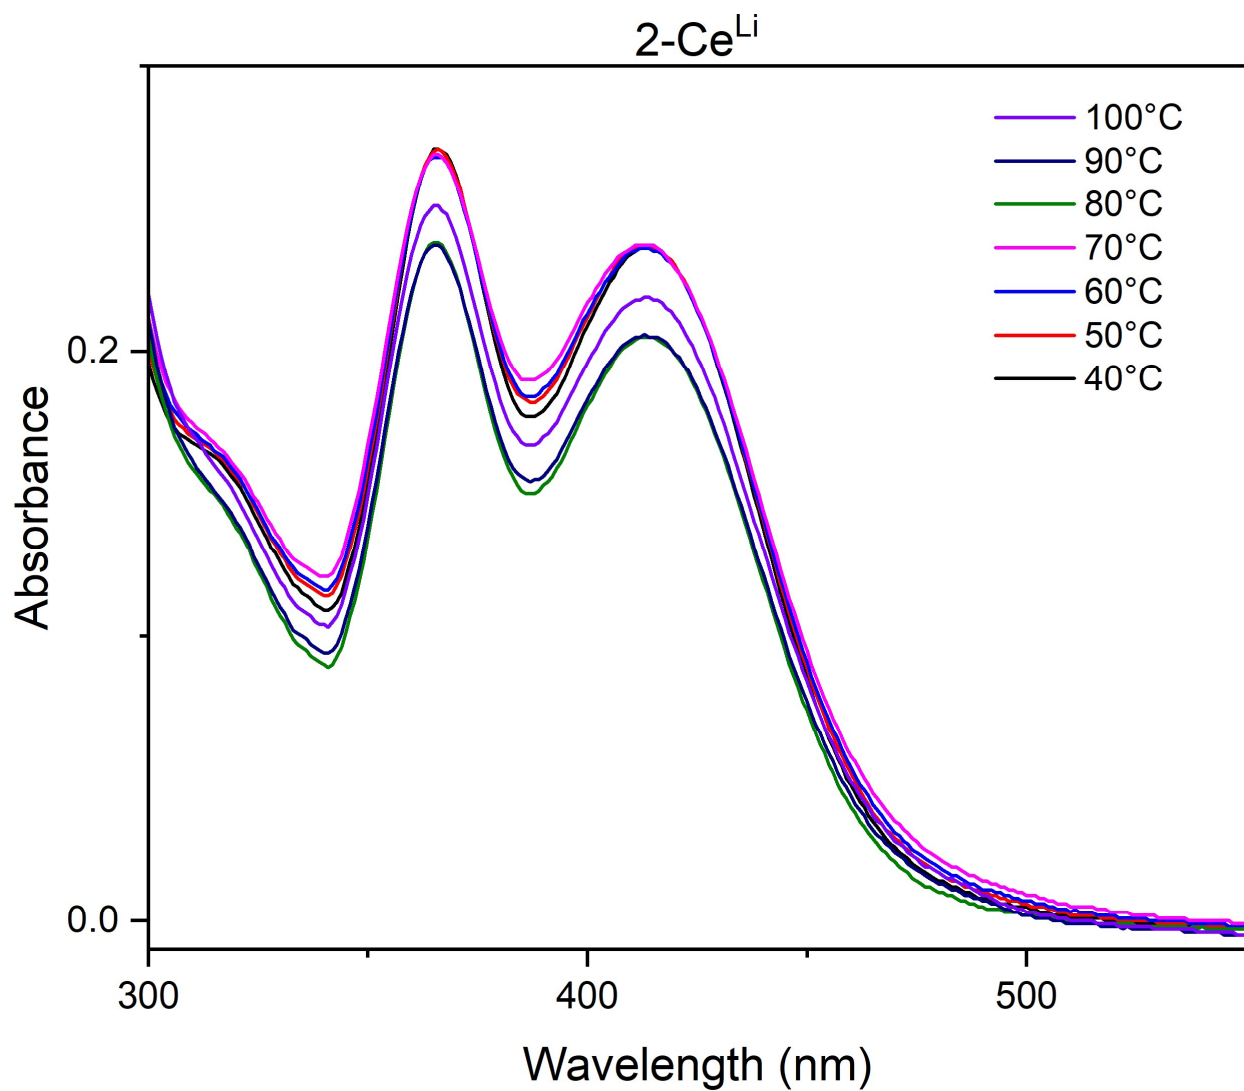

**Figure S43.** Variable-temperature UV-Vis spectra of 2-Ce<sup>Li</sup> in toluene.

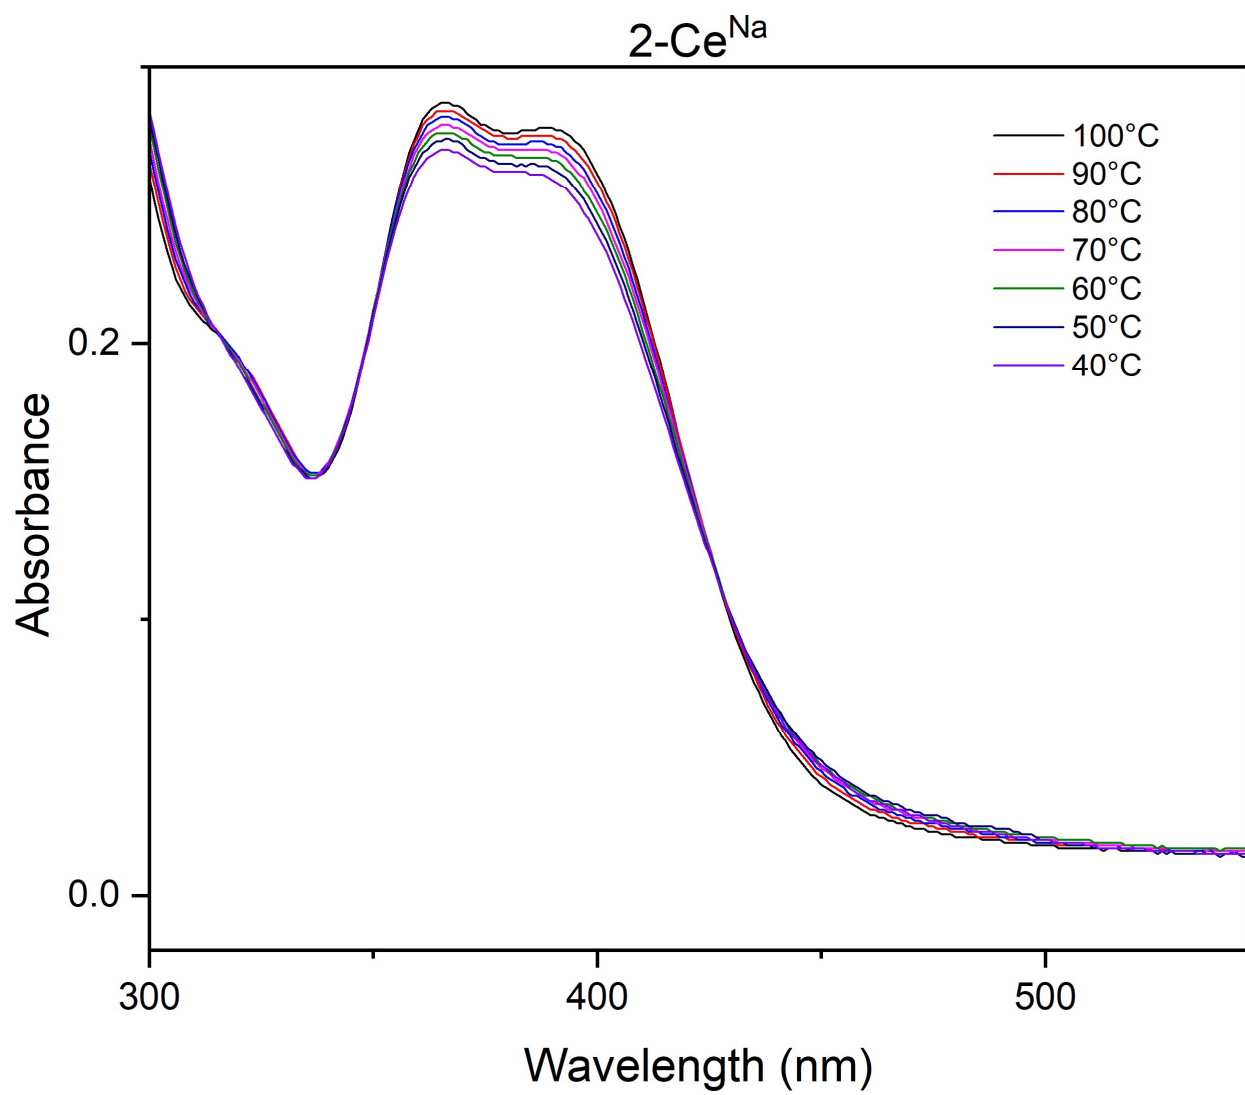

Figure S44. Variable-temperature UV-Vis spectra of  $2\text{-Ce}^{\text{Na}}$  in toluene.

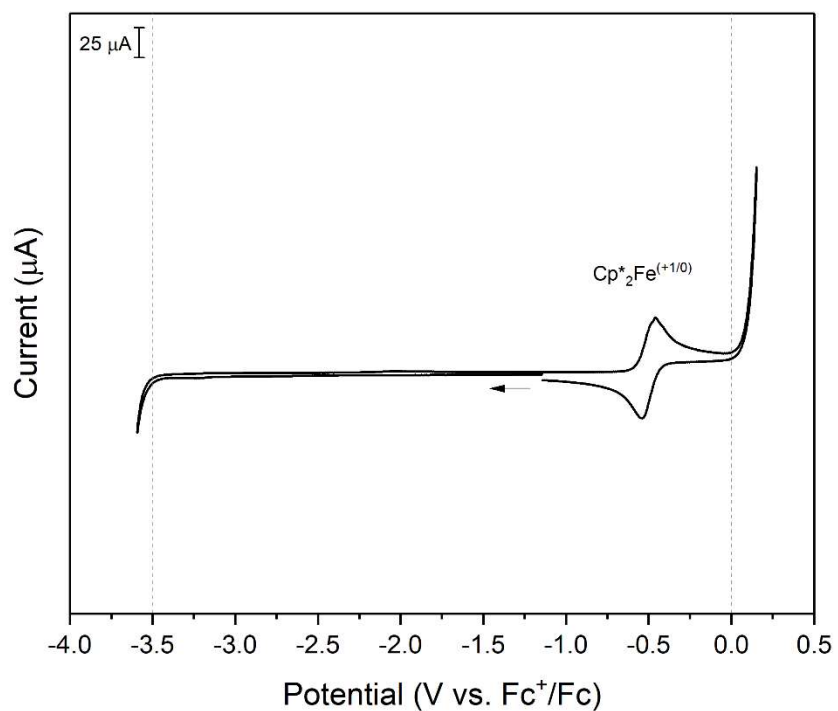

**Figure S45.** Cyclic voltammogram displaying electrochemical window of 50 mM  $[n\text{Bu}_4\text{N}][\text{BPh}_4]$  in THF with internal reference decamethylferrocene, scan rate = 200 mV/s. Reference lines at -3.5 V and 0 V.

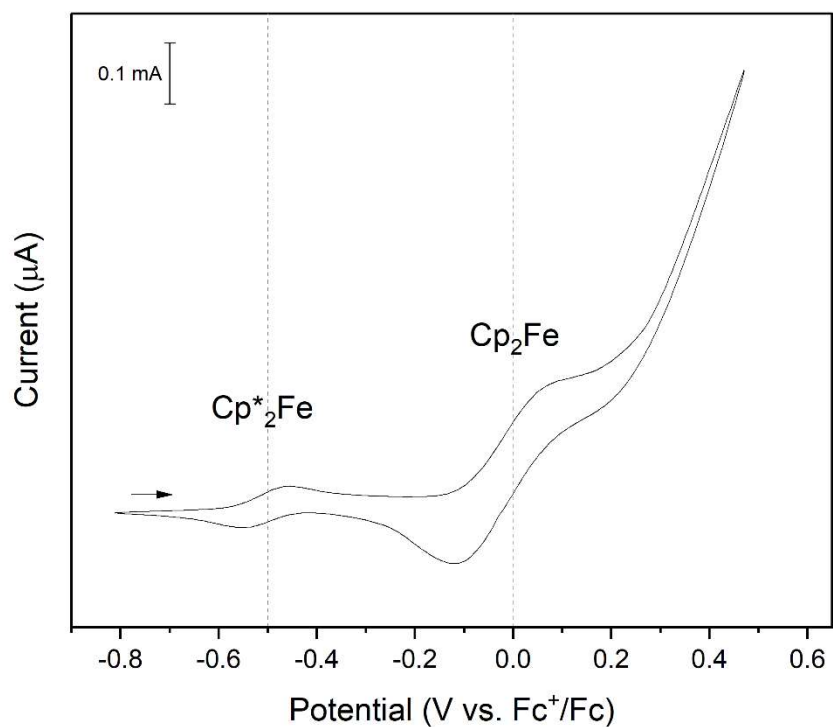

**Figure S46.** Cyclic voltammogram of decamethylferrocene vs. ferrocene in 50 mM  $[n\text{Bu}_4\text{N}][\text{BPh}_4]$  in THF, scan rate = 200 mV/s.

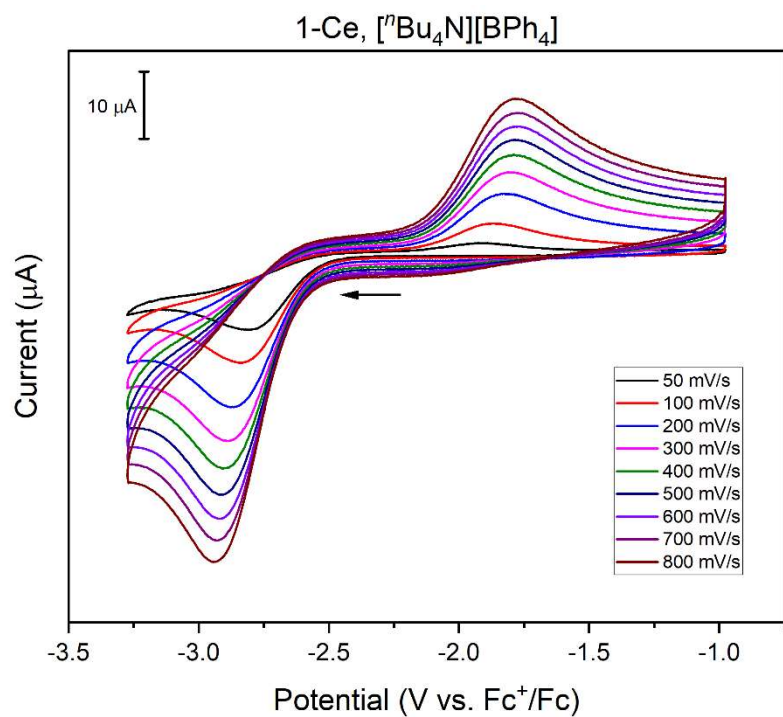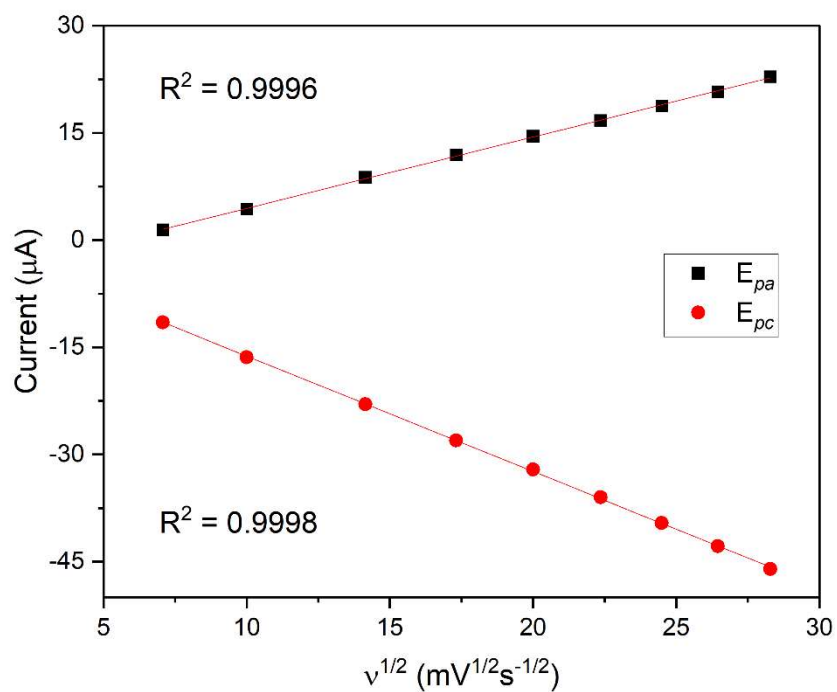

**Figure S47.** Scan-rate dependence of 3 mM **1-Ce** in 50 mM [<sup>n</sup>Bu<sub>4</sub>N][BPh<sub>4</sub>] in THF (top) and Randles-Sevcik plot (bottom).

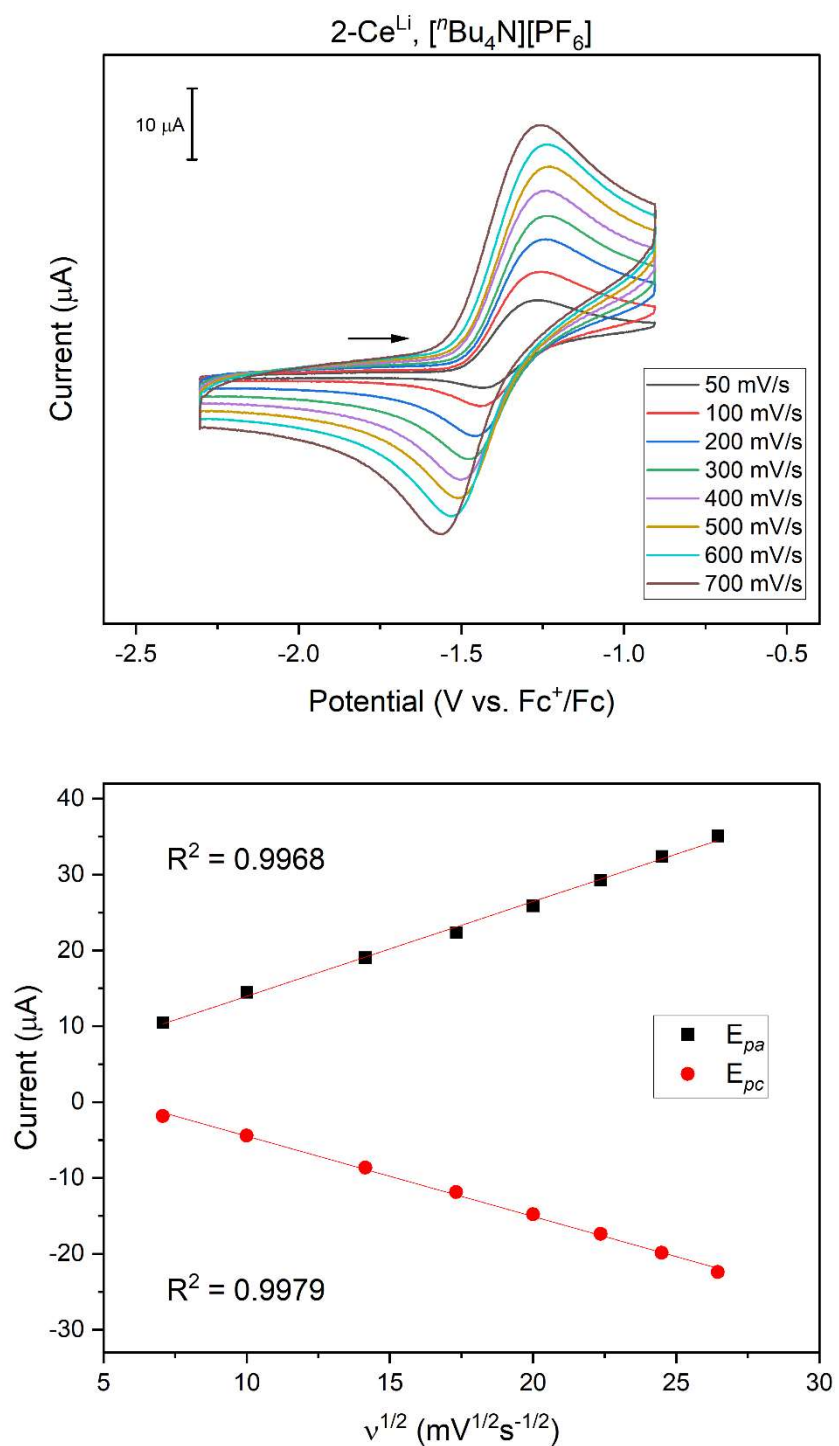

**Figure S48.** Scan-rate dependence of 3 mM 2-Ce<sup>Li</sup> in 50 mM [nBu<sub>4</sub>N][PF<sub>6</sub>] in THF (top) and Randles-Sevcik plot (bottom).

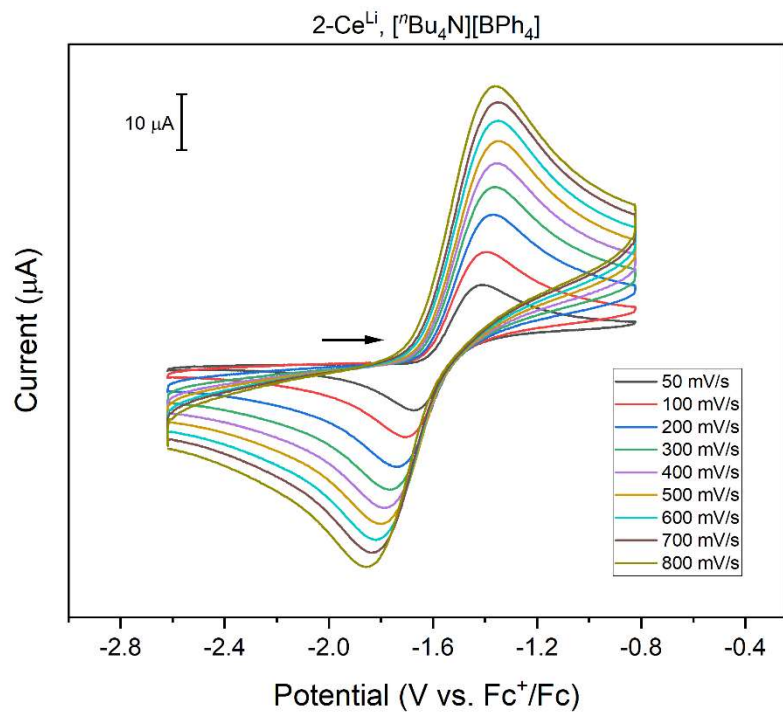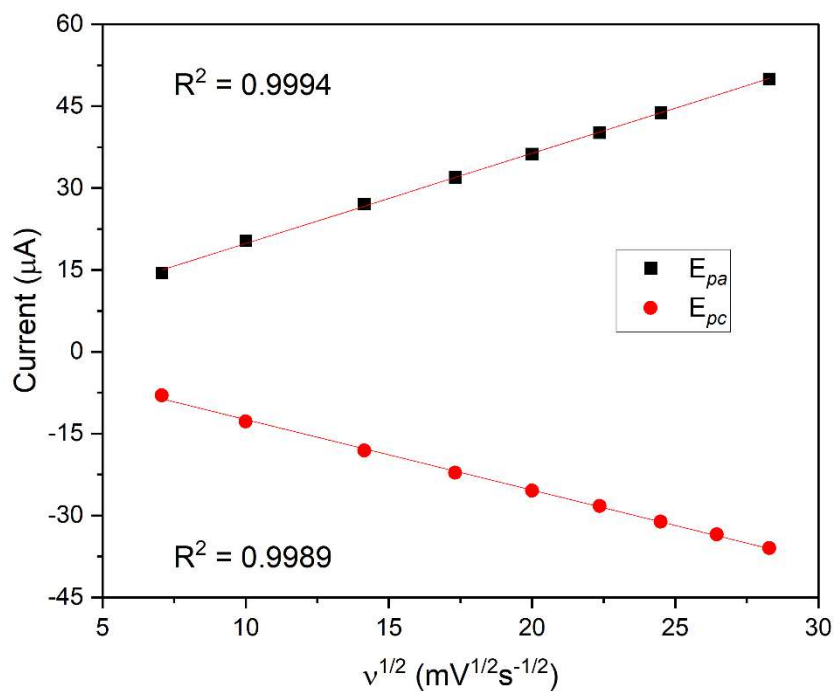

**Figure S49.** Scan-rate dependence of 3 mM 2-Ce<sup>Li</sup> in 50 mM [nBu<sub>4</sub>N][BPh<sub>4</sub>] in THF (top) and Randles-Sevcik plot (bottom).

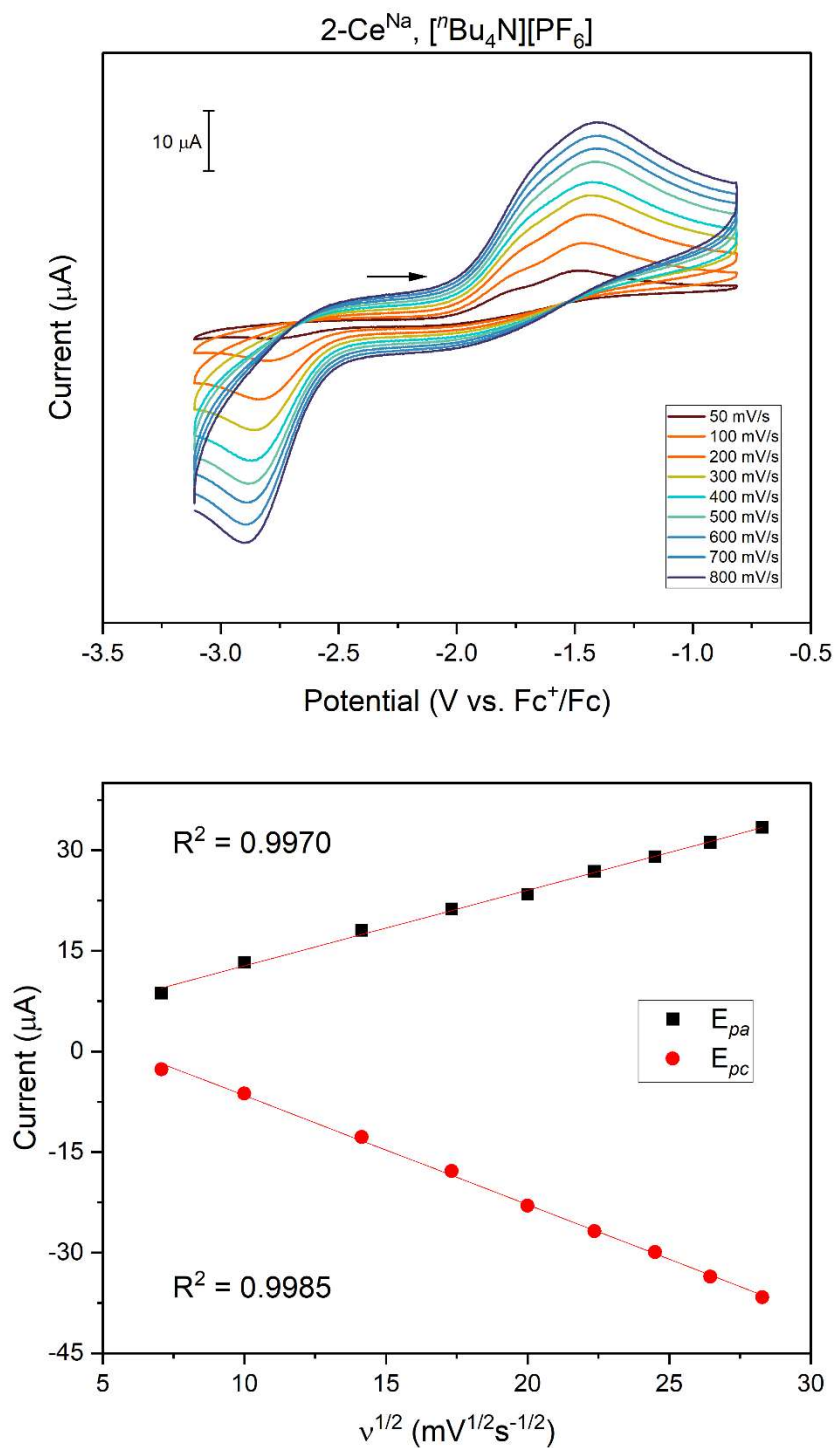

**Figure S50.** Scan-rate dependence of 3 mM 2-Ce<sup>Na</sup> in 100 mM [nBu<sub>4</sub>N][PF<sub>6</sub>] in THF (top) and Randles-Sevcik plot (bottom).



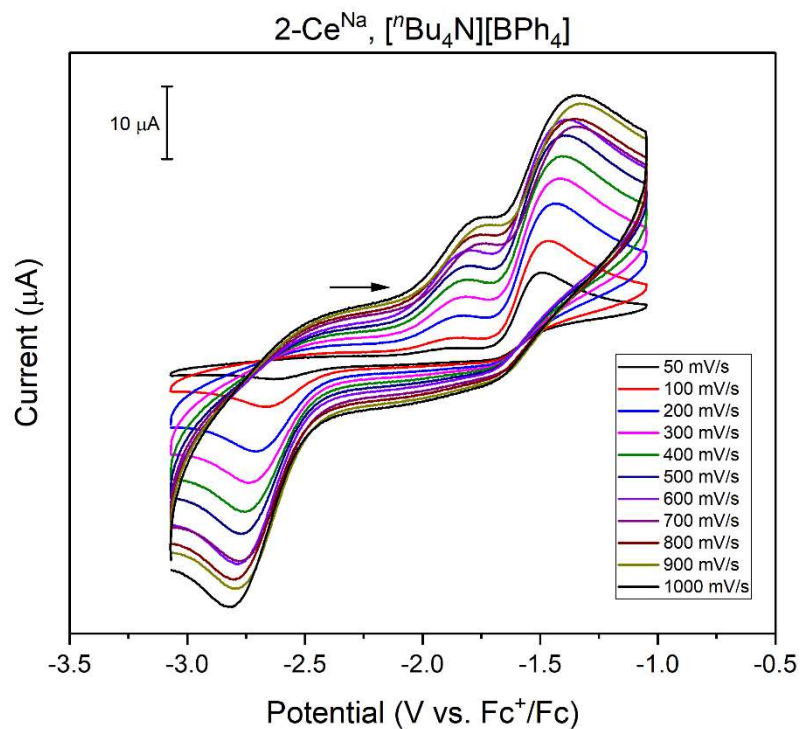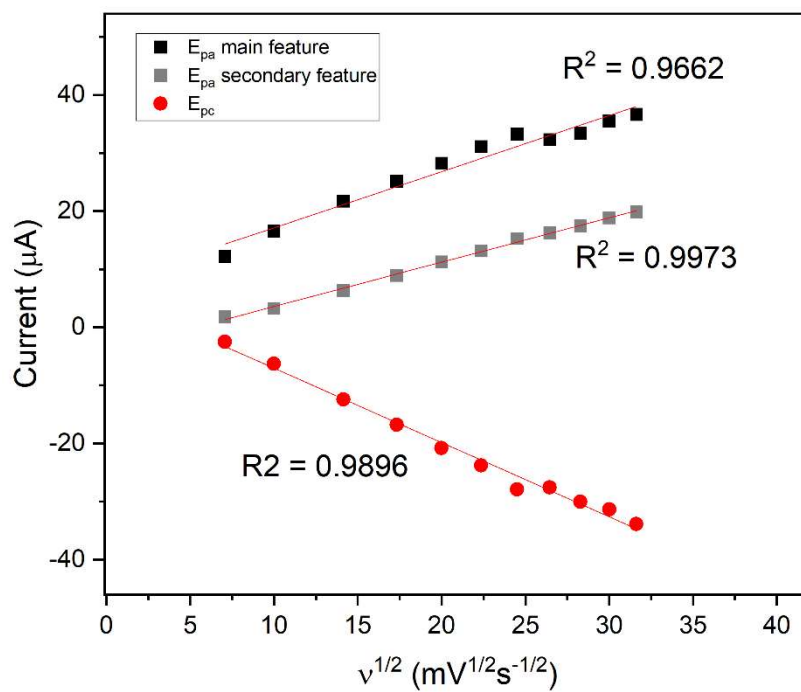

**Figure S51.** Scan-rate dependence of 3 mM 2-Ce<sup>Na</sup> in 50 mM [<sup>n</sup>Bu<sub>4</sub>N][BPh<sub>4</sub>] in THF (top) and Randles-Sevcik plot (bottom).

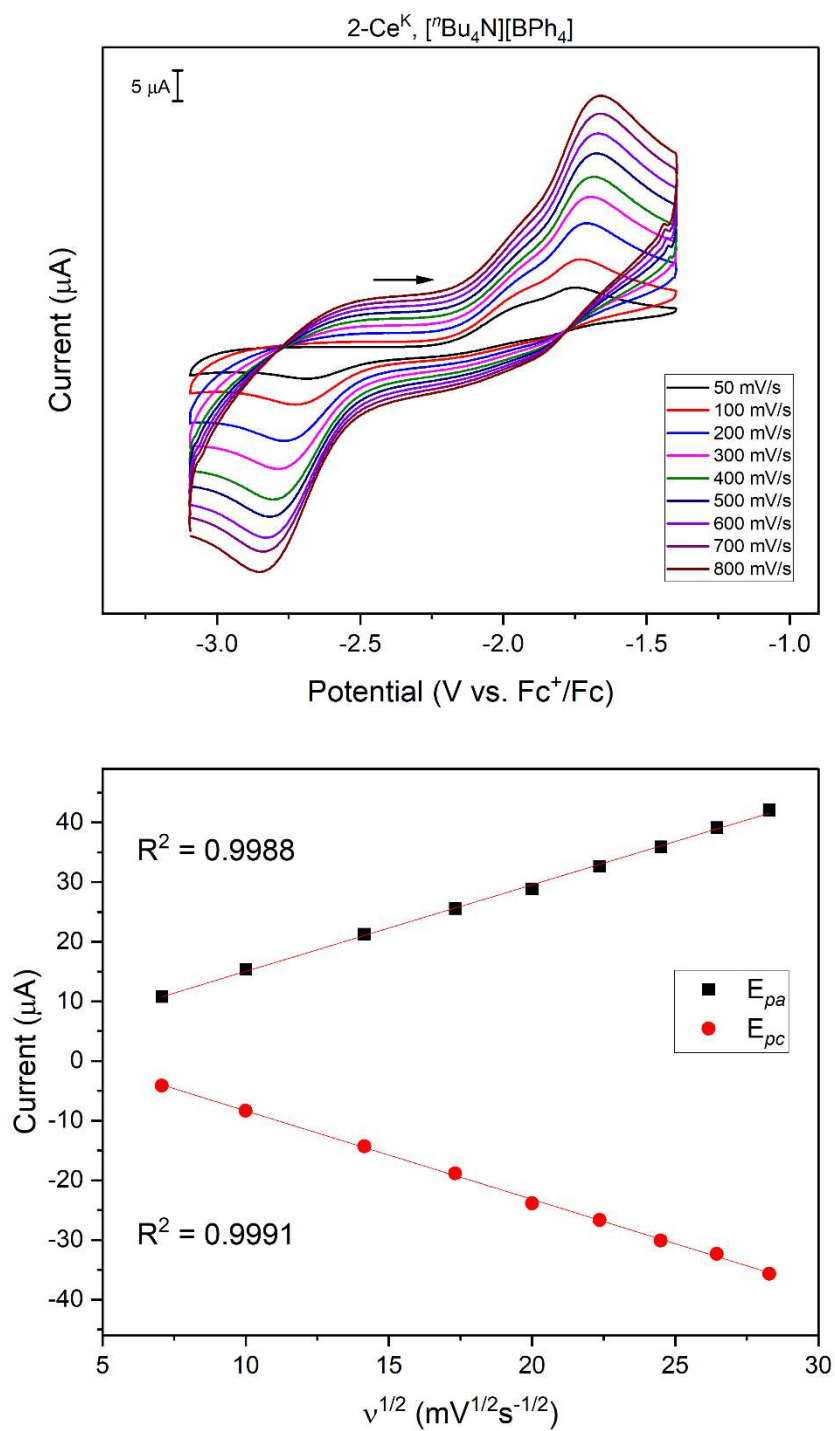

**Figure S52.** Scan-rate dependence of 3 mM 2-Ce<sup>K</sup> in 50 mM [t<sup>n</sup>Bu<sub>4</sub>N][BPh<sub>4</sub>] in THF (top) and Randles-Sevcik plot (bottom).

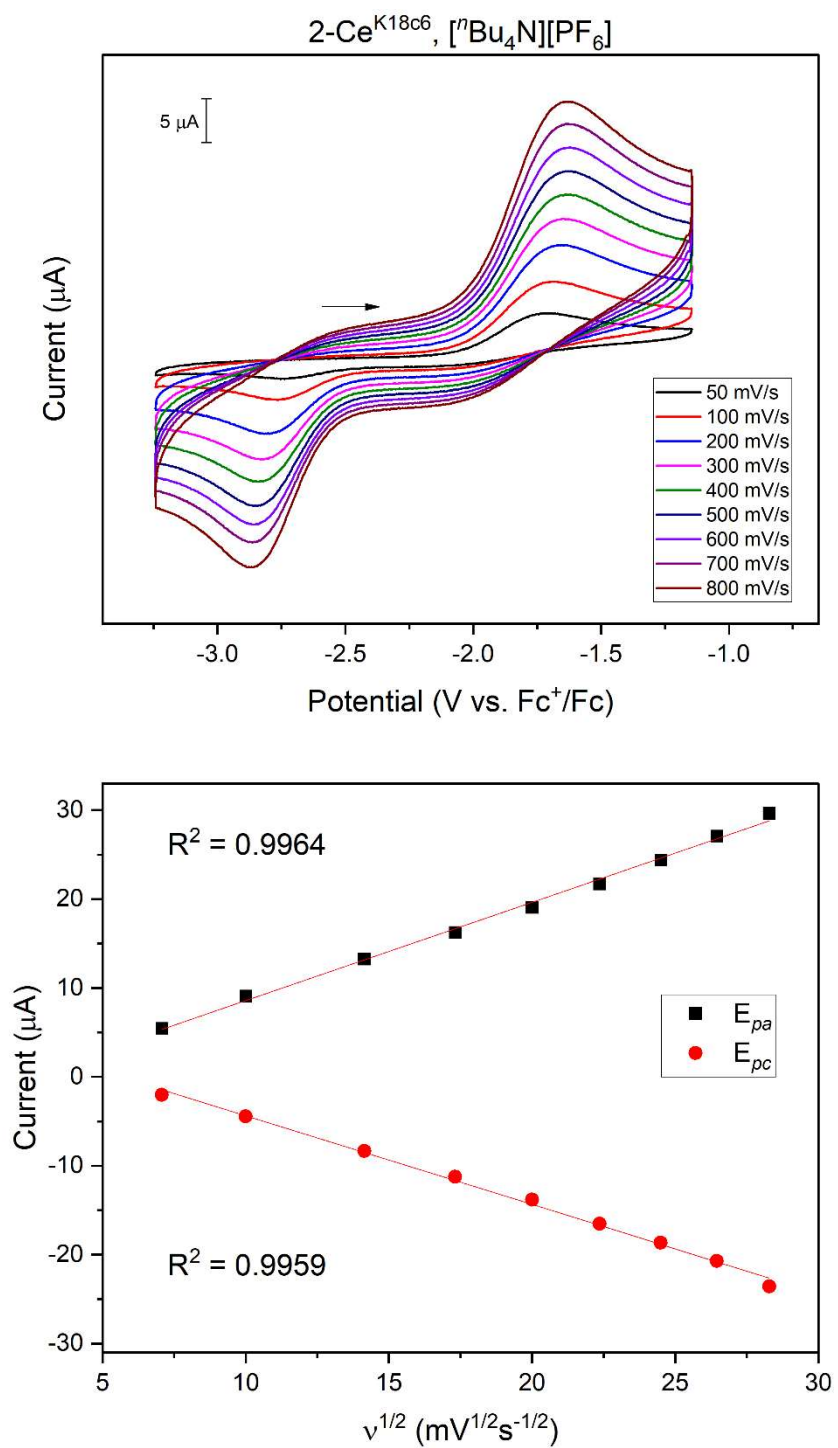

**Figure S53.** Scan-rate dependence of 3 mM **2-Ce<sup>K18c6</sup>** in 100 mM [nBu<sub>4</sub>N][PF<sub>6</sub>] in THF (top) and Randles-Sevcik plot (bottom).

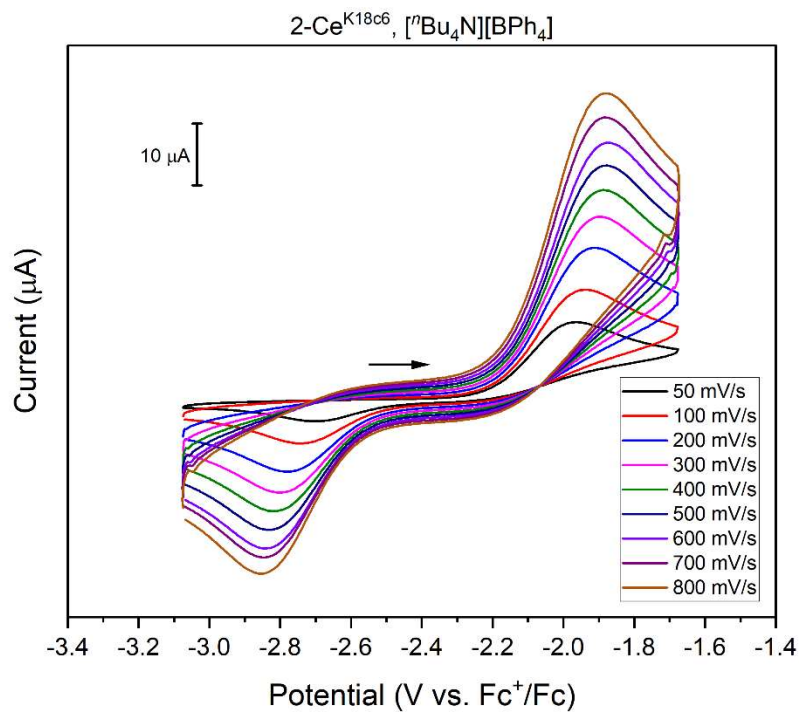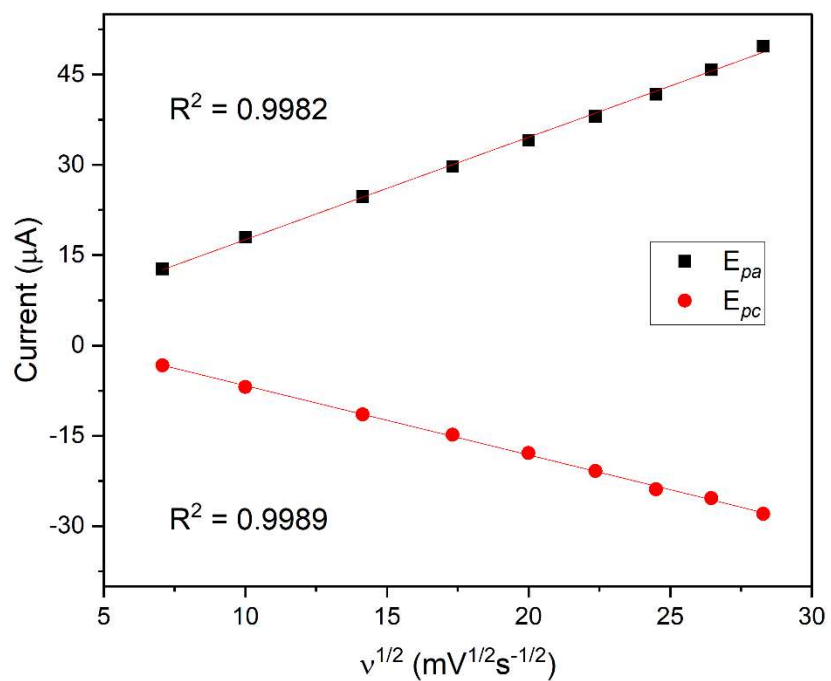

**Figure S54.** Scan-rate dependence of 3 mM 2-Ce<sup>K18c6</sup> in 50 mM [<sup>n</sup>Bu<sub>4</sub>N][BPh<sub>4</sub>] in THF (top) and Randles-Sevcik plot (bottom).

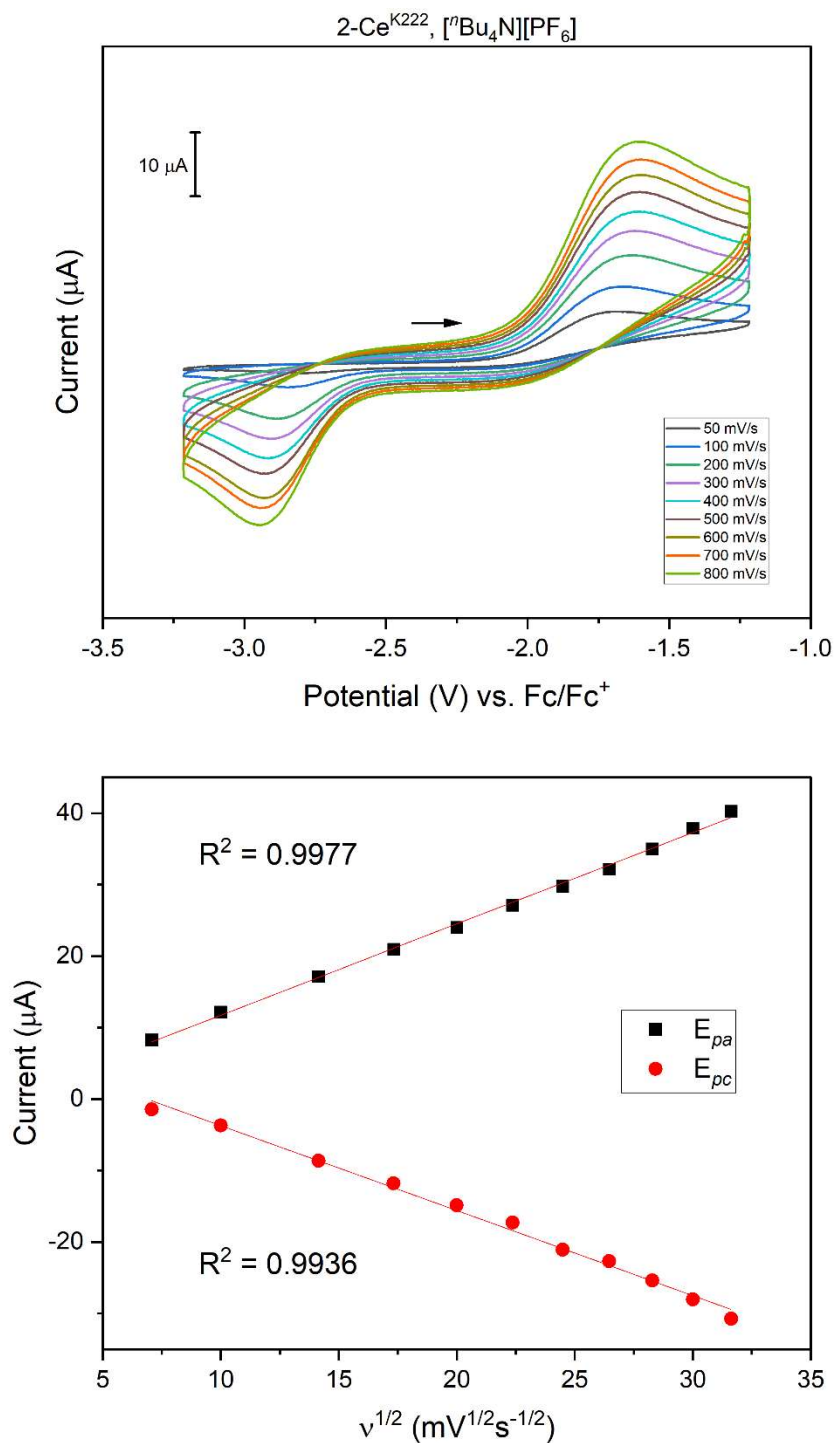

**Figure S55.** Scan-rate dependence of 3 mM 2-Ce<sup>K222</sup> in 100 mM [nBu<sub>4</sub>N][PF<sub>6</sub>] in THF (top) and Randles-Sevcik plot (bottom).

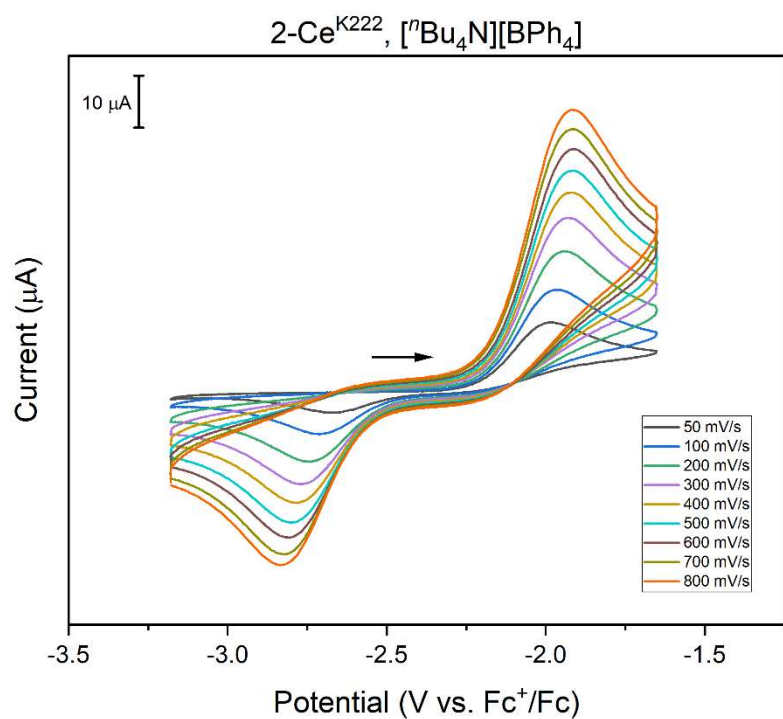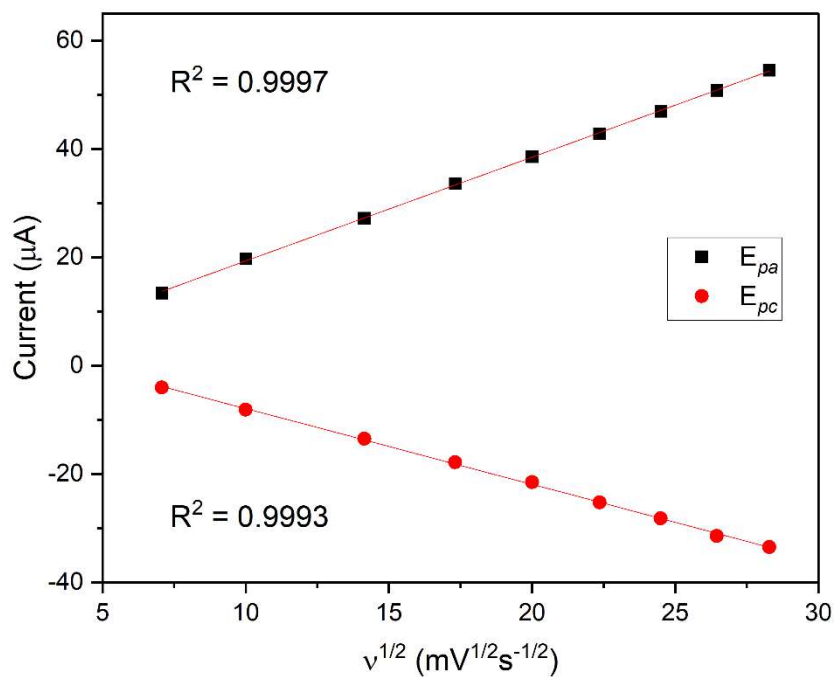

**Figure S56.** Scan-rate dependence of 3 mM 2-Ce<sup>K222</sup> in 50 mM [nBu<sub>4</sub>N][BPh<sub>4</sub>] in THF (top) and Randles-Sevcik plot (bottom).

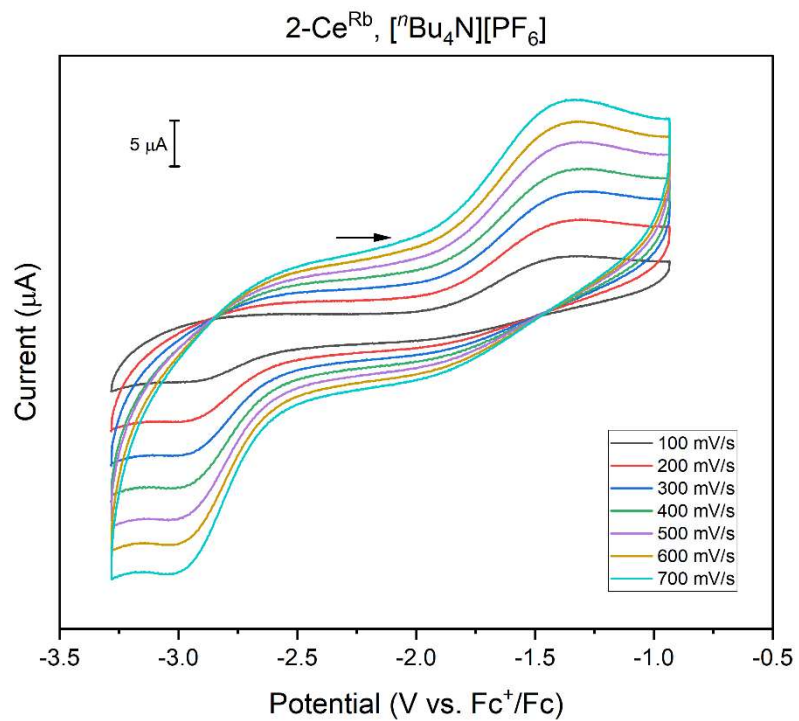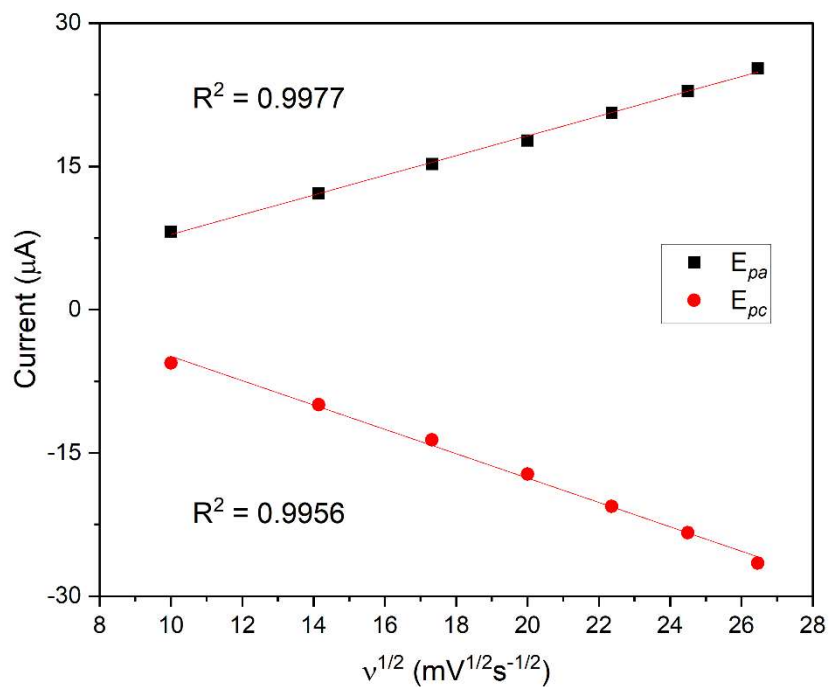

**Figure S57.** Scan-rate dependence of 3 mM **2-Ce<sup>Rb</sup>** in 100 mM [nBu<sub>4</sub>N][PF<sub>6</sub>] in THF (top) and Randles-Sevcik plot (bottom).

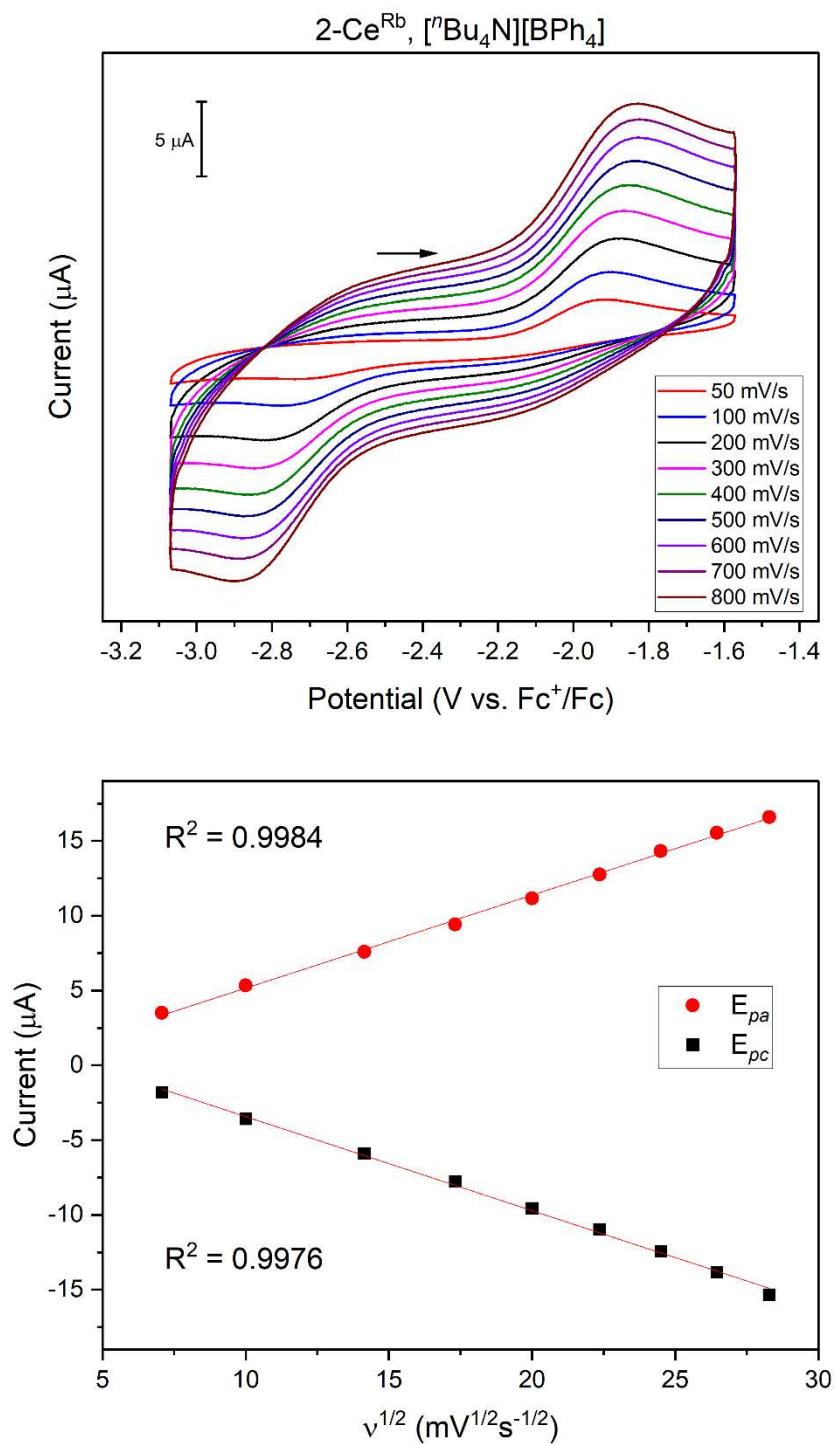

**Figure S58.** Scan-rate dependence of 1 mM **2-Ce<sup>Rb</sup>** in 50 mM [nBu<sub>4</sub>N][BPh<sub>4</sub>] in THF (top) and Randles-Sevcik plot (bottom).



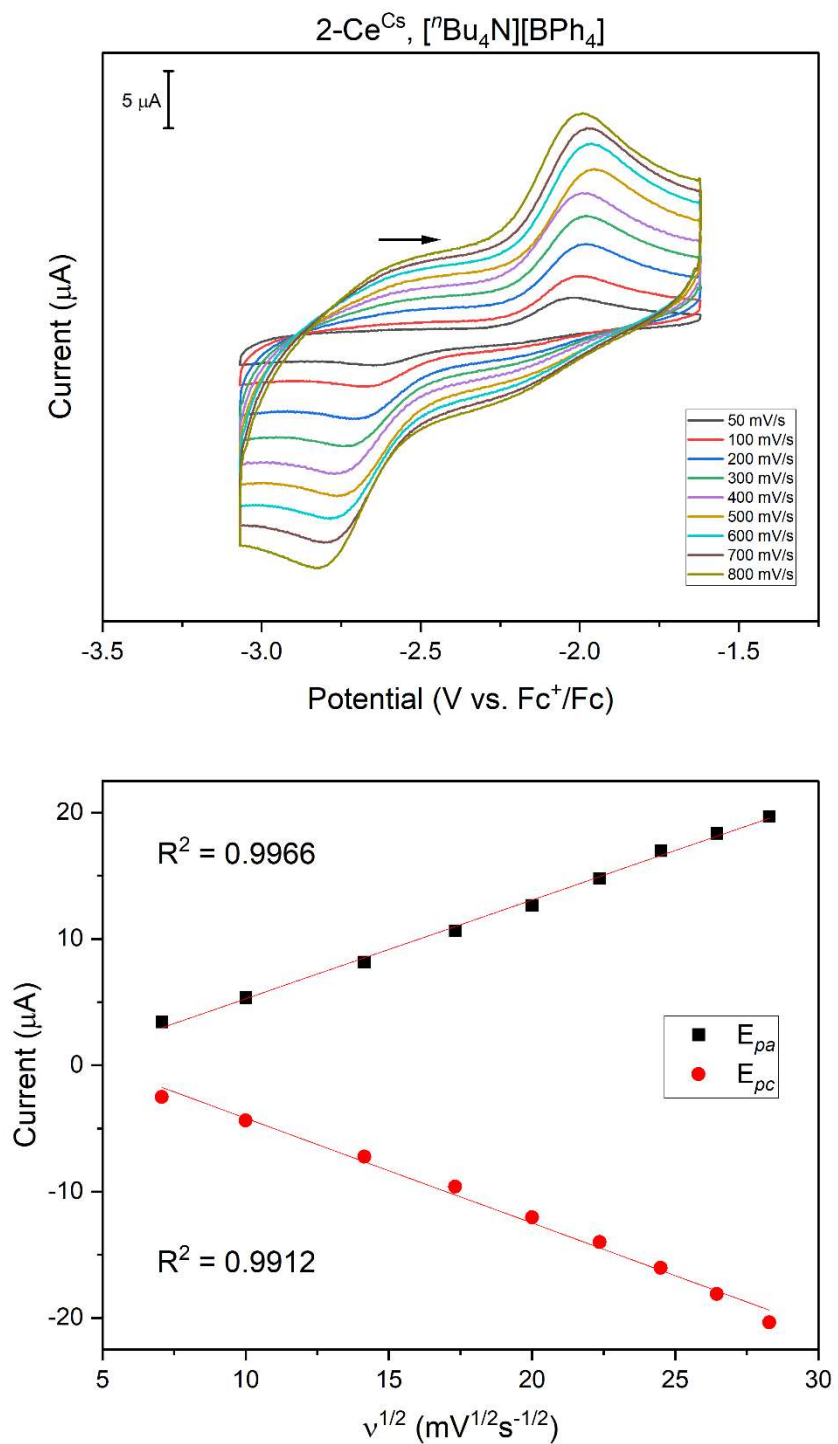

**Figure S59.** Scan-rate dependence of 1 mM 2-Ce<sup>Cs</sup> in 50 mM [<sup>n</sup>Bu<sub>4</sub>N][BPh<sub>4</sub>] in THF (top) and Randles-Sevcik plot (bottom).

Differential Pulse Voltammetry

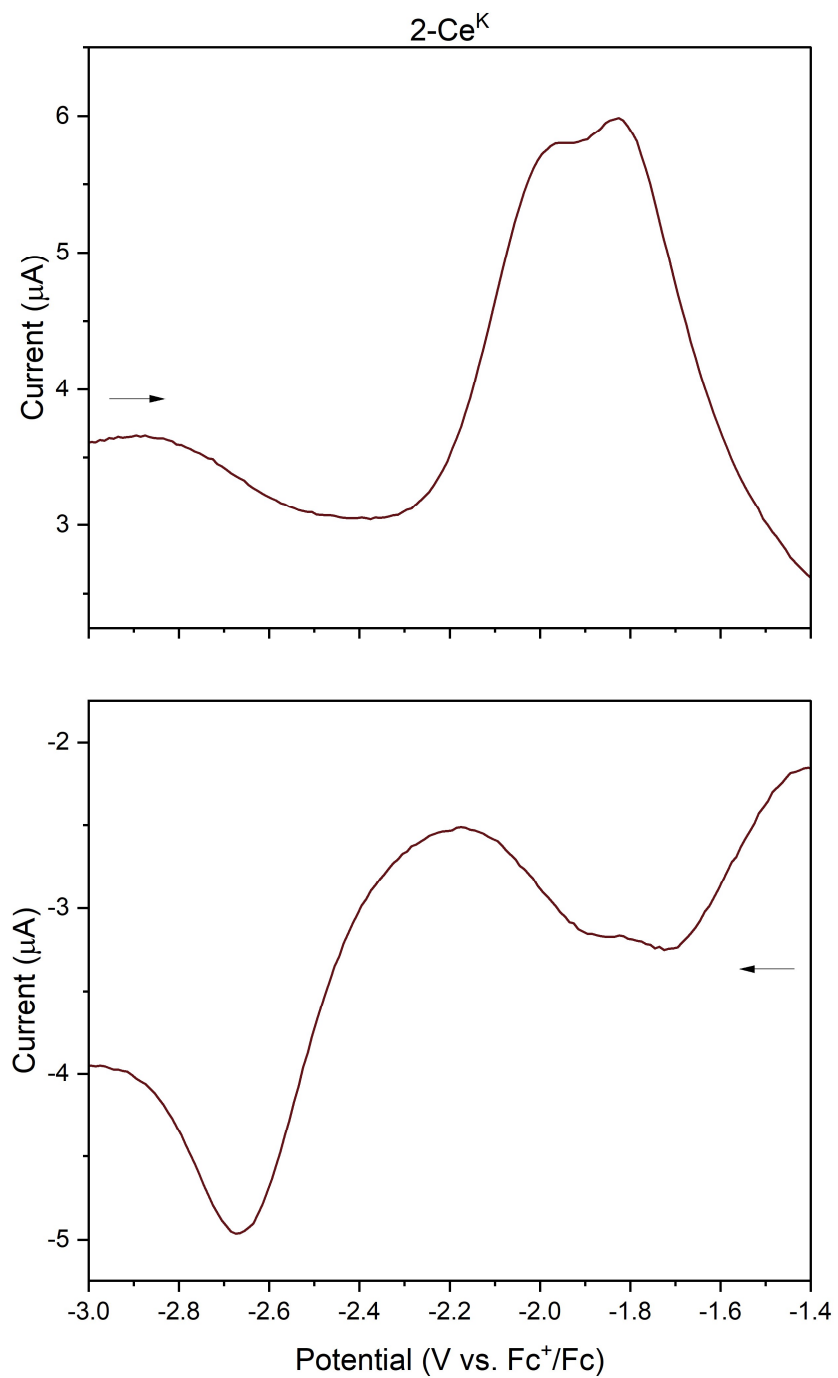

**Figure S60.** Differential pulse voltammogram of **2-Ce<sup>K</sup>** in 50 mM [<sup>n</sup>Bu<sub>4</sub>N][BPh<sub>4</sub>] in THF.

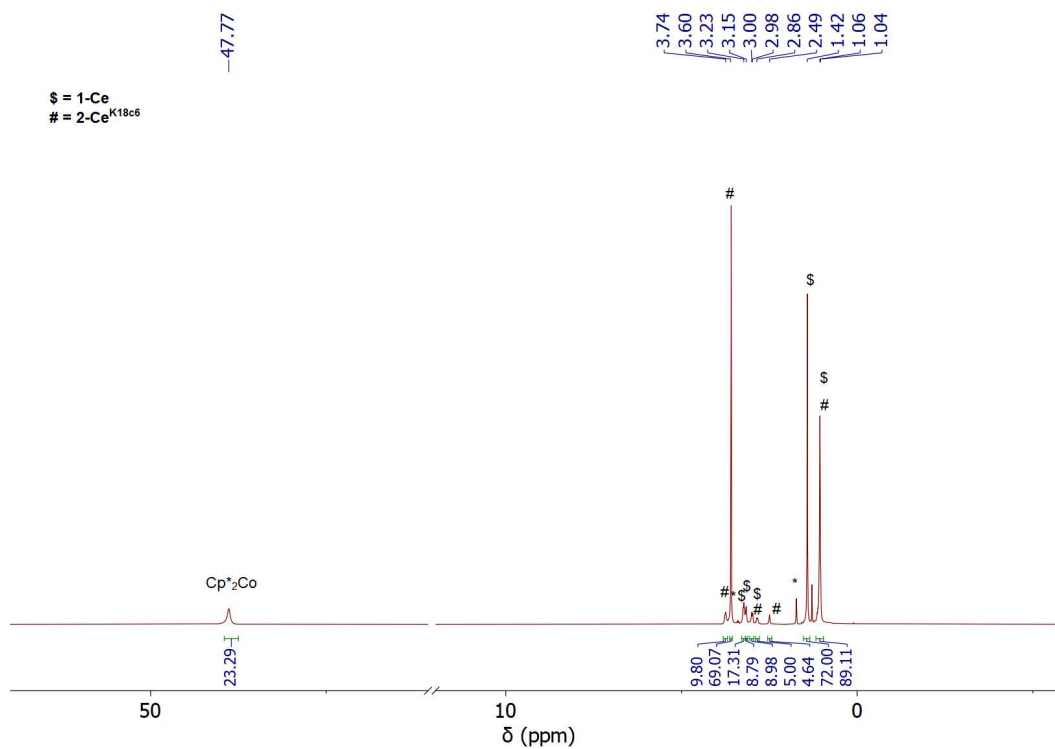

Figure S61. <sup>1</sup>H NMR spectrum of 2-Ce<sup>K18c6</sup> + [CoCp\*<sub>2</sub>][PF<sub>6</sub>] in THF-d<sub>8</sub>. \* denotes THF-d<sub>7</sub>.

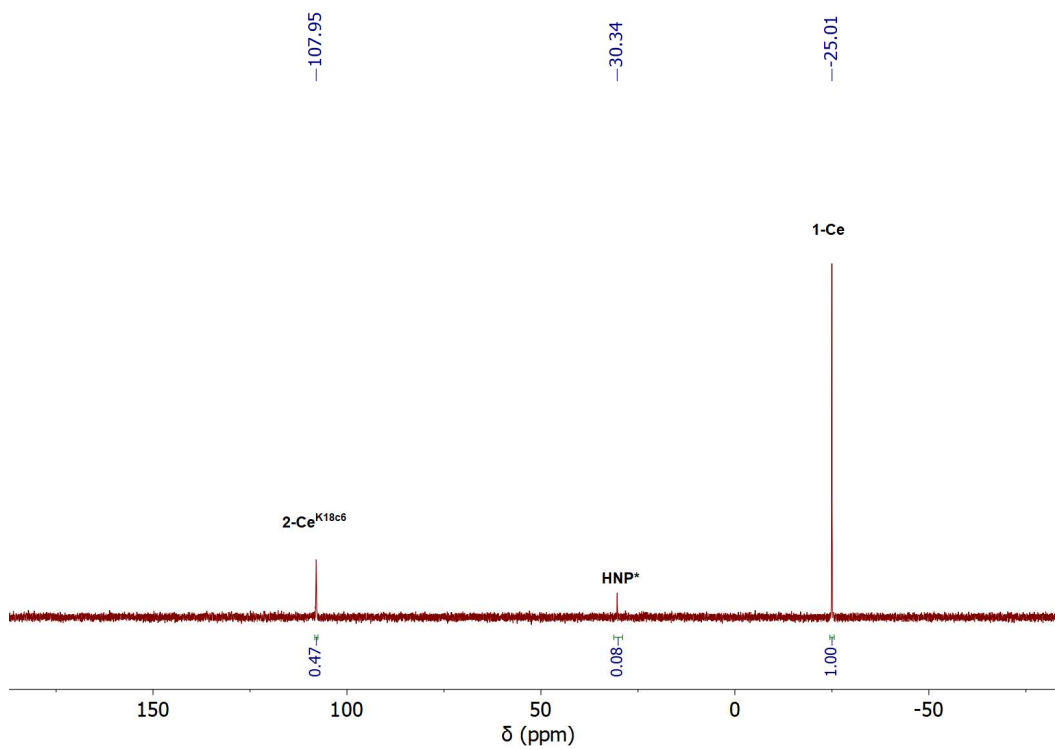

Figure S62. <sup>31</sup>P{<sup>1</sup>H} NMR spectrum of 2-Ce<sup>K18c6</sup> + [CoCp\*<sub>2</sub>][PF<sub>6</sub>] in THF-d<sub>8</sub>.

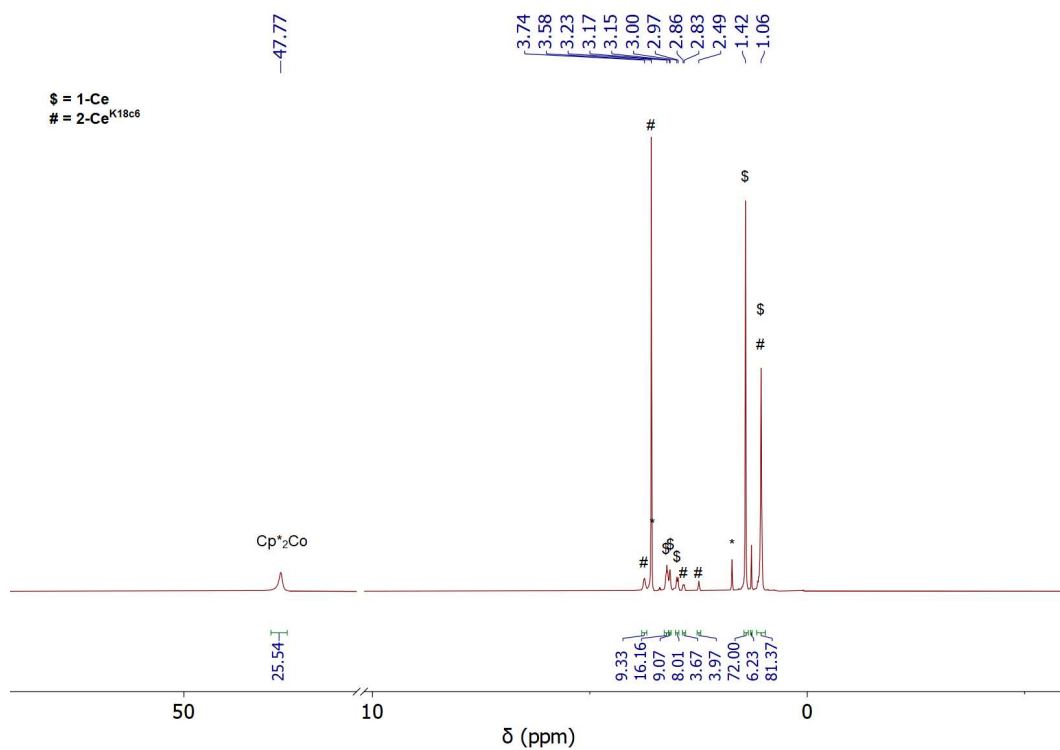

**Figure S63.**  $^1\text{H}$  NMR spectrum of  $2\text{-Ce}^{\text{K18c6}}$  +  $[\text{CoCp}^*_2][\text{PF}_6]$  in  $\text{THF-d}_8$  after heating at  $60^\circ\text{C}$  for 1h. \* denotes  $\text{THF-d}_7$ .

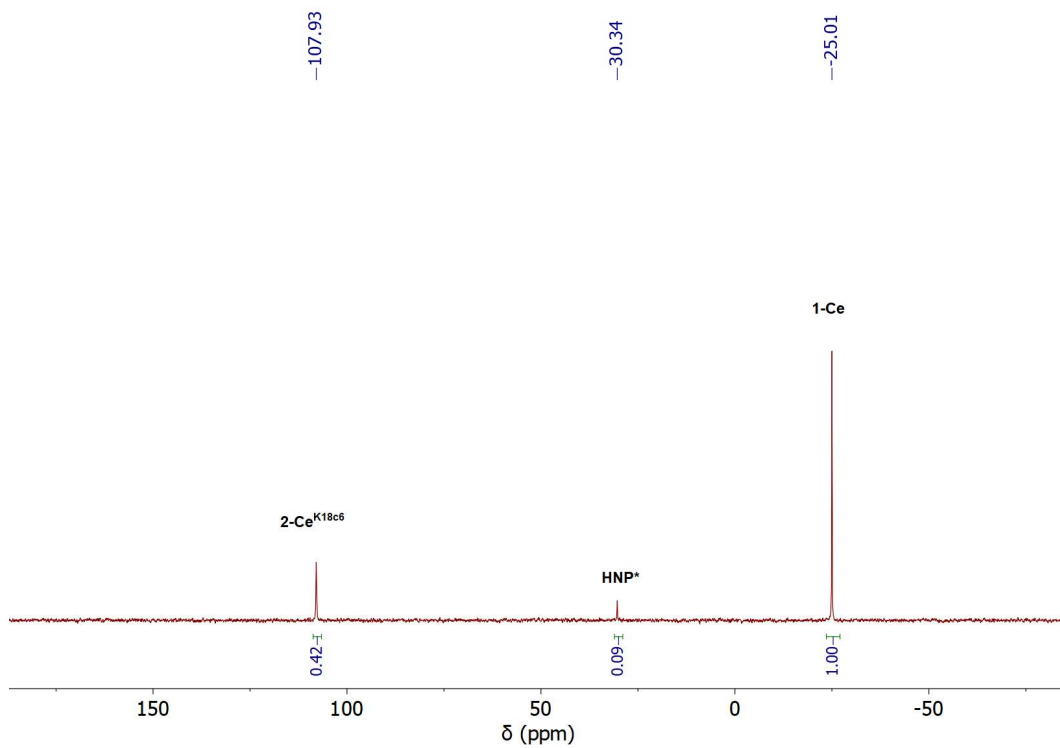

**Figure S64.**  $^{31}\text{P}\{^1\text{H}\}$  NMR spectrum of  $2\text{-Ce}^{\text{K18c6}}$  +  $[\text{CoCp}^*_2][\text{PF}_6]$  in  $\text{THF-d}_8$  after heating at  $60^\circ\text{C}$  for 1h.

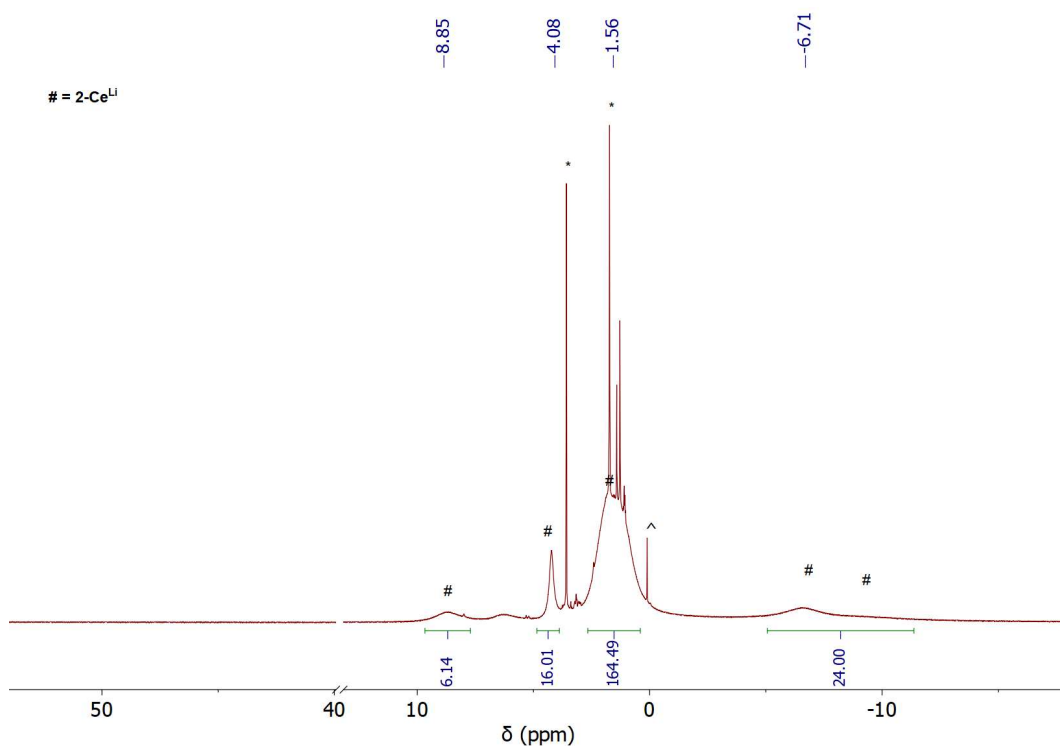

**Figure S65.**  $^1\text{H}$  NMR spectrum of **2-Ce<sup>Li</sup>** +  $[\text{CoCp}^*_2][\text{PF}_6]$  in THF- $d_8$ . \* denotes THF- $d_7$ , ^ denotes silicone grease. Note: There is no signal of  $[\text{CoCp}^*_2]$  at 47.77 ppm.

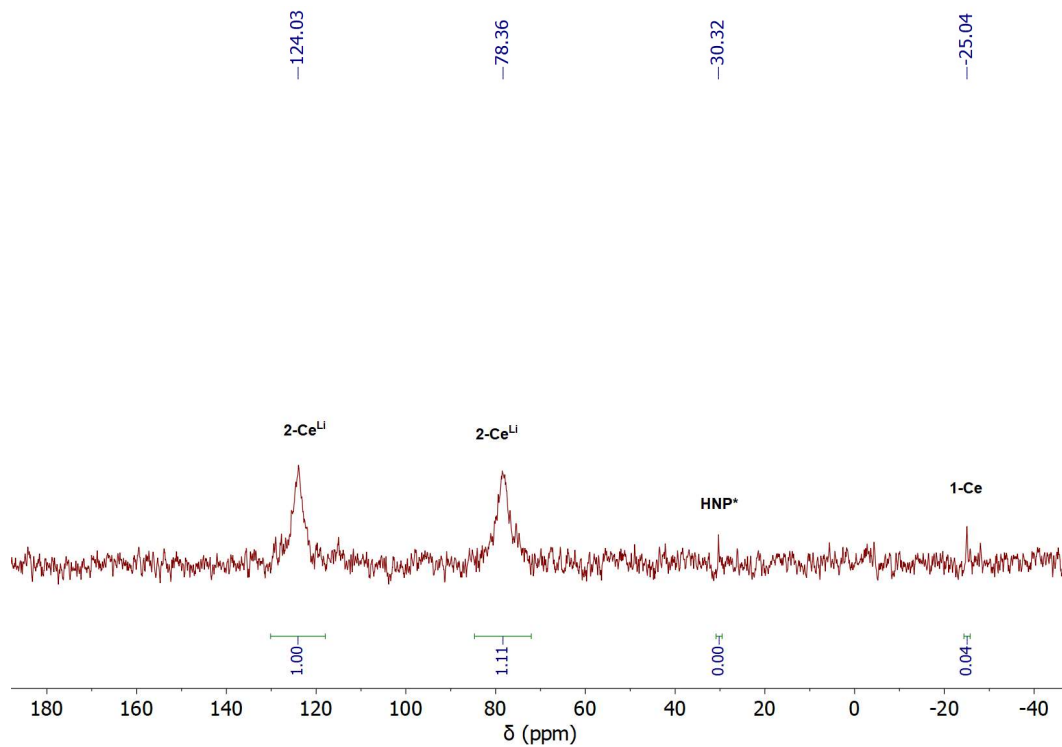

**Figure S66.**  $^{31}\text{P}\{^1\text{H}\}$  NMR spectrum of **2-Ce<sup>Li</sup>** +  $[\text{CoCp}^*_2][\text{PF}_6]$  in THF- $d_8$ .

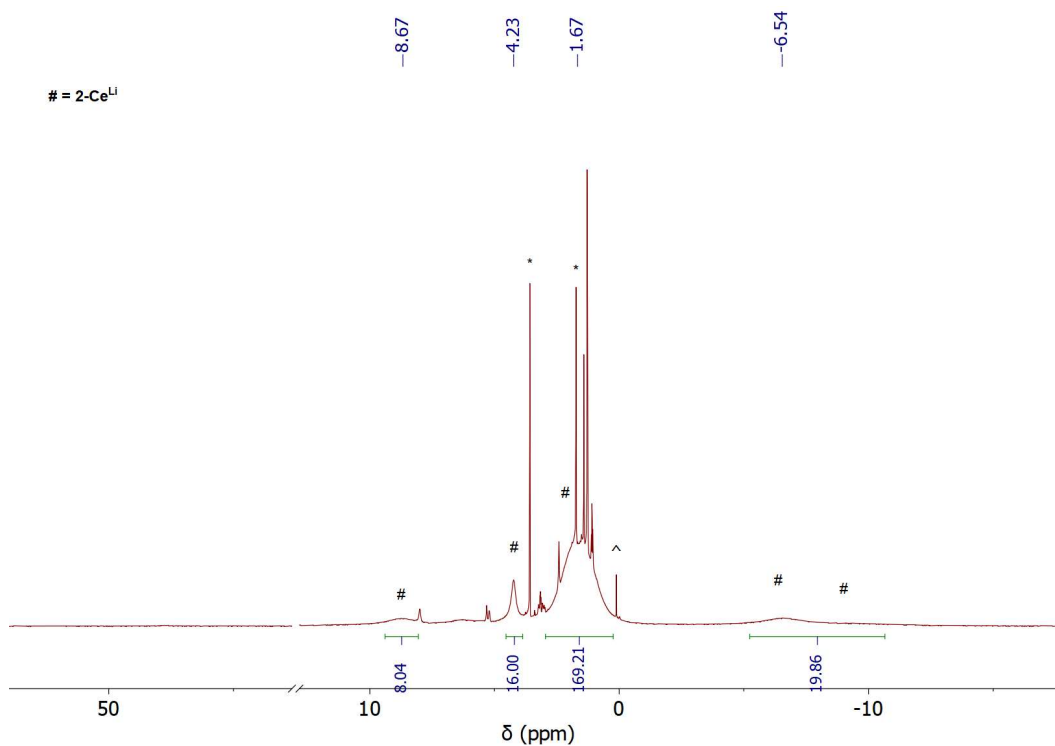

**Figure S67.**  $^1\text{H}$  NMR spectrum of **2-Ce<sup>Li</sup>** +  $[\text{Co Cp}^*_2][\text{PF}_6]$  in THF- $\text{d}_8$  after heating at  $60^\circ\text{C}$  for 1h. \* denotes THF- $\text{d}_7$ , ^ denotes silicone grease. Note: There is no signal of  $[\text{Co Cp}^*_2]$  at 47.77 ppm.

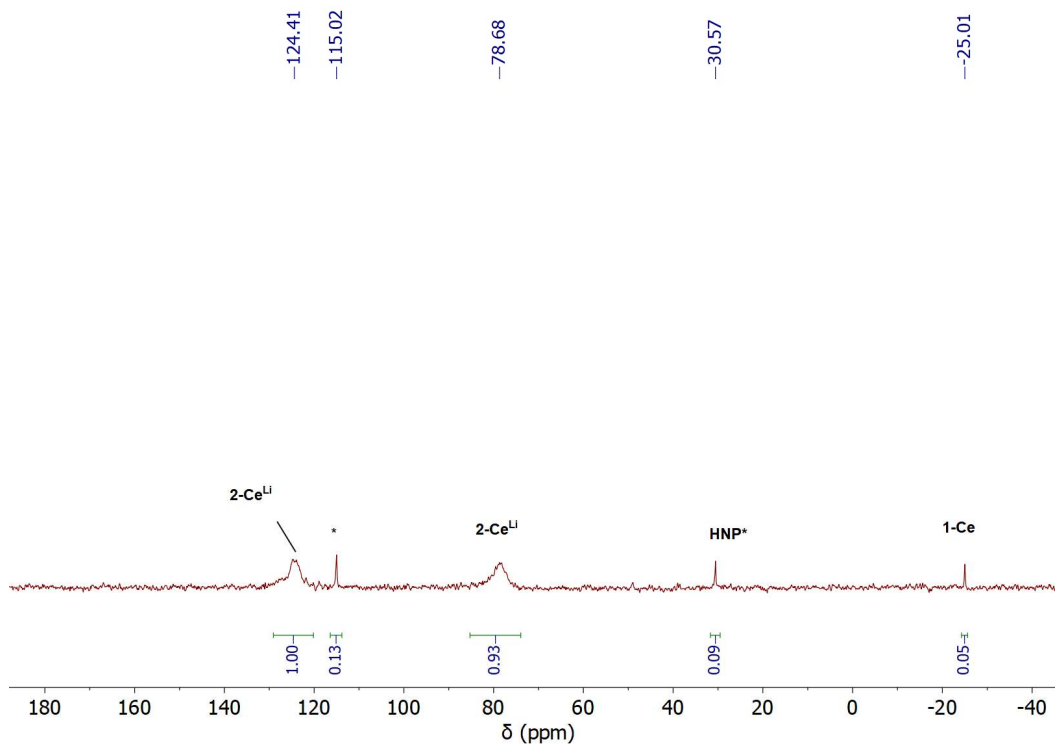

**Figure S68.**  $^{31}\text{P}\{^1\text{H}\}$  NMR spectrum of **2-Ce<sup>Li</sup>** +  $[\text{Co Cp}^*_2][\text{PF}_6]$  in THF- $\text{d}_8$  after heating at  $60^\circ\text{C}$  for 1h.\* denotes an unidentified side product.

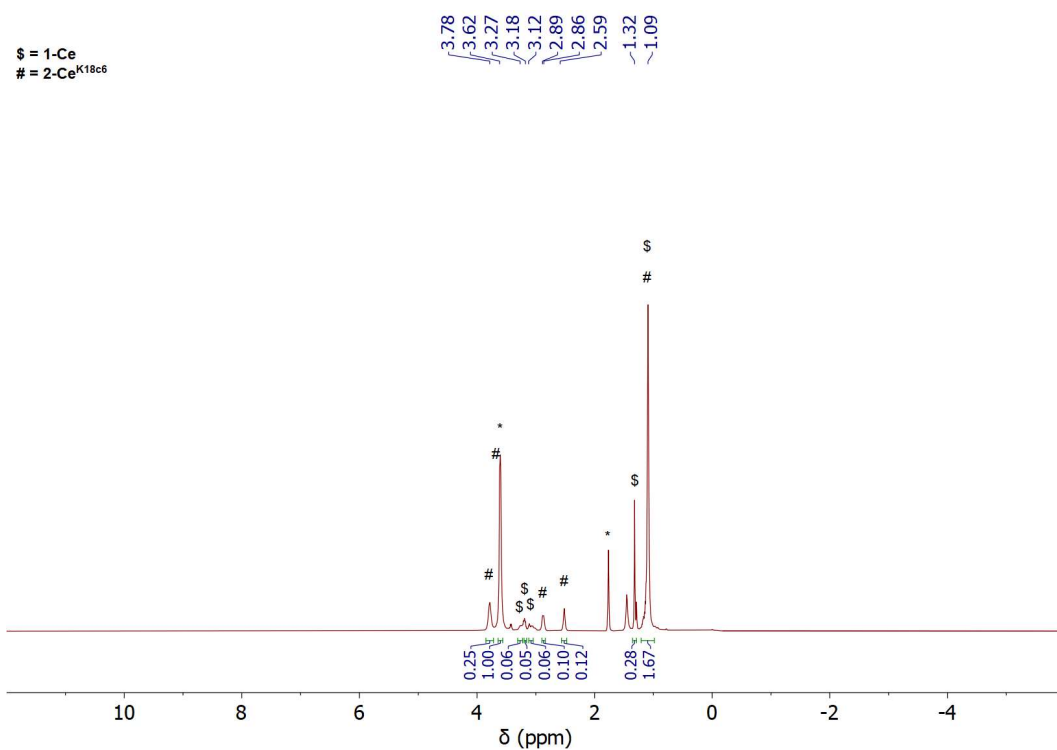

**Figure S69.** <sup>1</sup>H NMR spectrum of **2-Ce<sup>K18c6</sup>** + benzophenone in THF-d<sub>8</sub>. \* denotes THF-d<sub>7</sub>. Note: While there was not complete conversion to **1-Ce**, all benzophenone was consumed, suggesting side reactions are occurring, as supported by the presence of a significant amount of HNP\*.

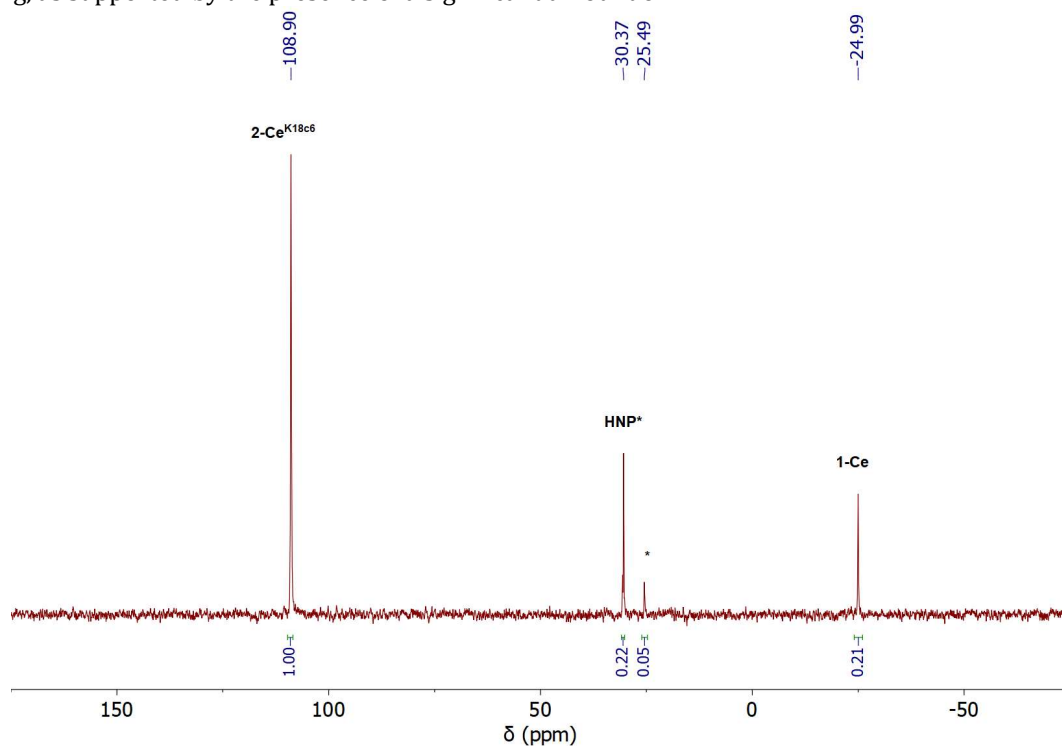

**Figure S70.** <sup>31</sup>P{<sup>1</sup>H} NMR spectrum of **2-Ce<sup>K18c6</sup>** + benzophenone in THF-d<sub>8</sub>. \* denotes an unidentified side product.

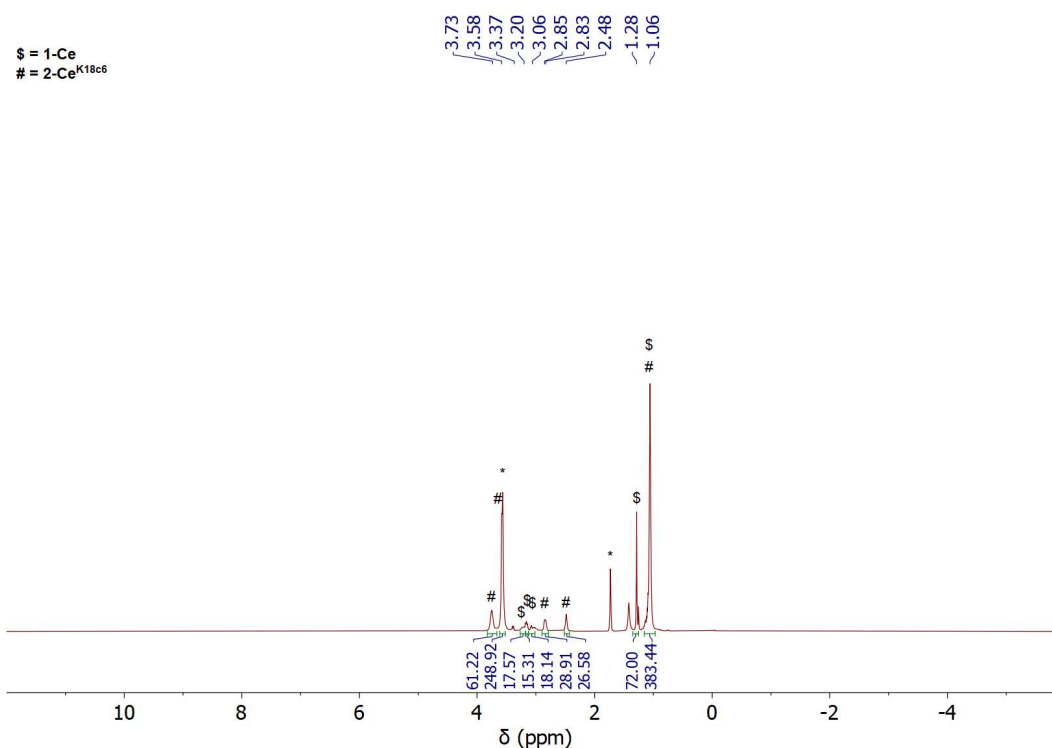

**Figure S71.** <sup>1</sup>H NMR spectrum of **2-Ce<sup>K18c6</sup>** + benzophenone in THF-d<sub>8</sub> after heating at 60°C for 1h. \* denotes THF-d<sub>7</sub>. Note: While there was not complete conversion to **1-Ce**, all benzophenone was consumed, suggesting side reactions are occurring, as supported by the presence of a significant amount of HNP\*.

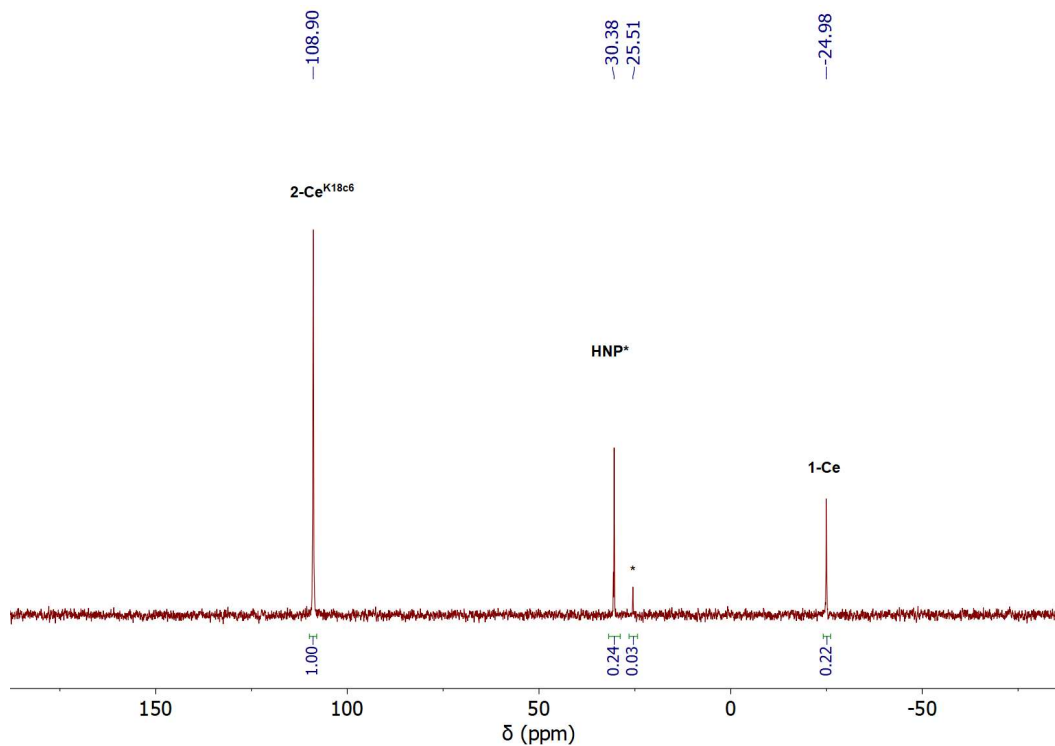

**Figure S72.** <sup>31</sup>P{<sup>1</sup>H} NMR spectrum of **2-Ce<sup>K18c6</sup>** + benzophenone in THF-d<sub>8</sub> after heating at 60°C for 1h. \* denotes an unidentified side product.



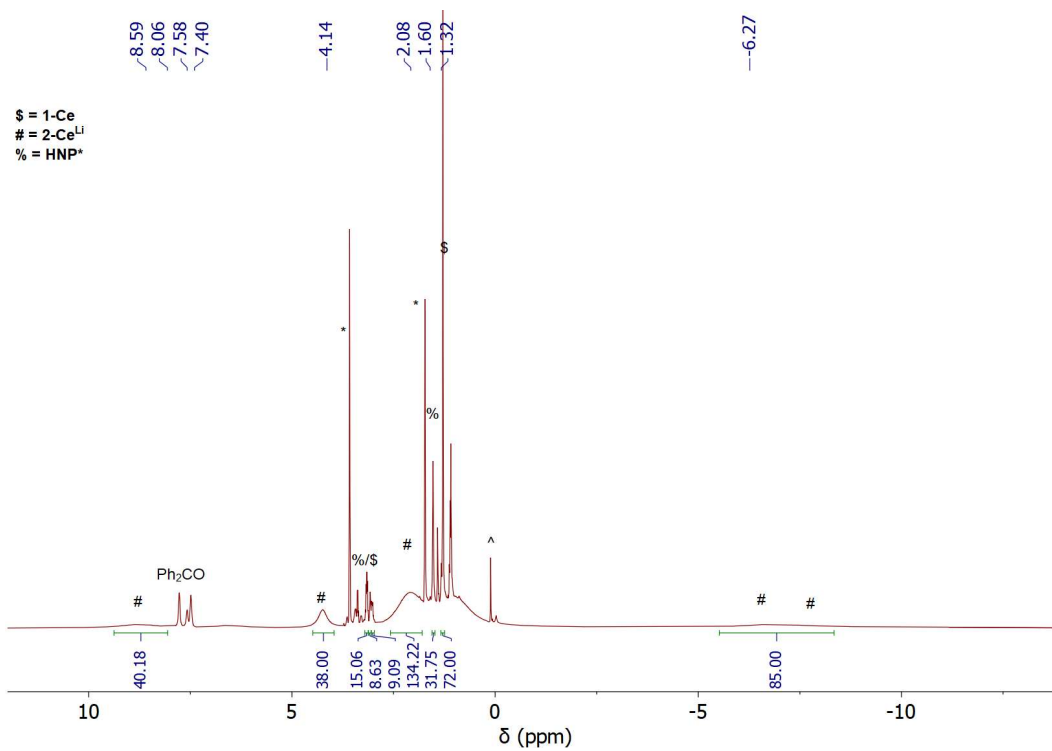

**Figure S73.**  $^1\text{H}$  NMR spectrum of  $2\text{-CeLi}$  + benzophenone in  $\text{THF-d}_8$ . \* denotes  $\text{THF-d}_7$ , ^ denotes silicone grease.

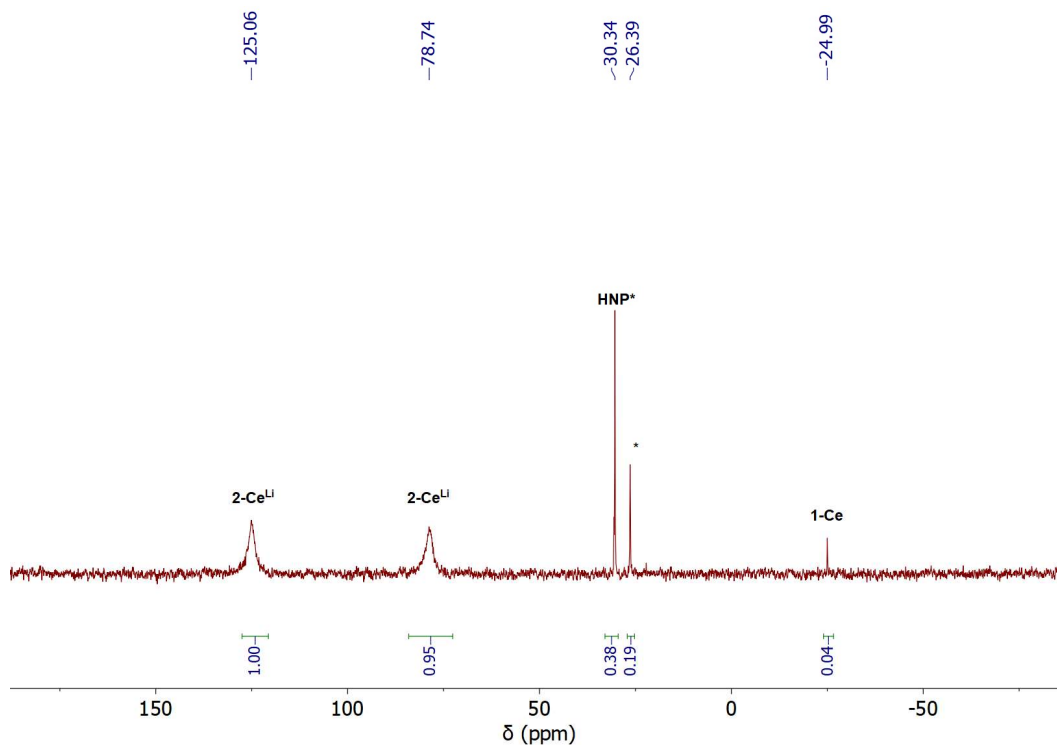

**Figure S74.**  $^{31}\text{P}\{^1\text{H}\}$  NMR spectrum of  $2\text{-CeLi}$  + benzophenone in  $\text{THF-d}_8$ . \* denotes an unidentified side product.

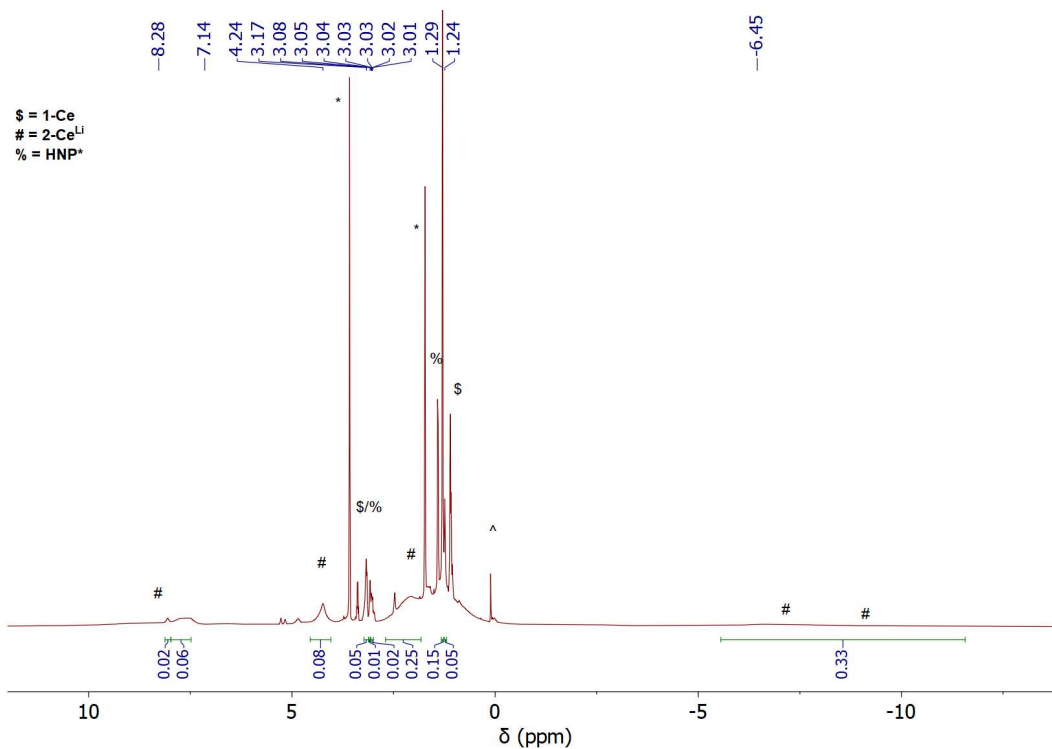

**Figure S75.**  $^1\text{H}$  NMR spectrum of  $2\text{-Ce}^{\text{Li}}$  + benzophenone in  $\text{THF-d}_8$  after heating at  $60^\circ\text{C}$  for 1 h. \* denotes  $\text{THF-d}_7$ , ^ denotes silicone grease.

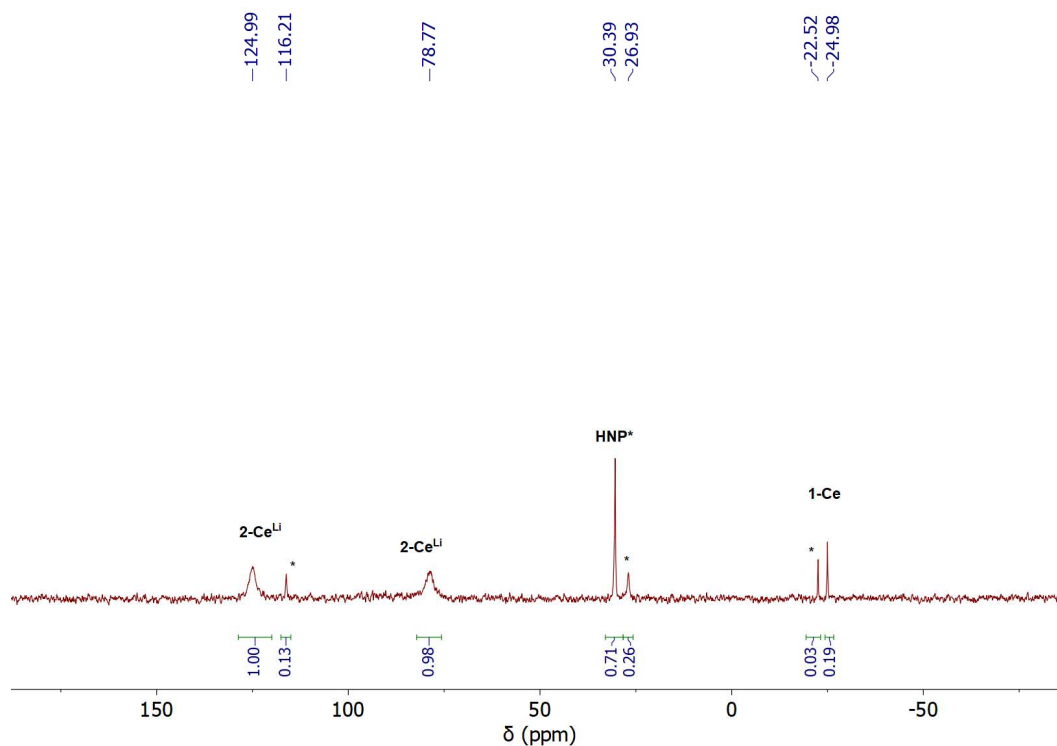

**Figure S76.**  $^{31}\text{P}\{^1\text{H}\}$  NMR spectrum of  $2\text{-Ce}^{\text{Li}}$  + benzophenone in  $\text{THF-d}_8$  after heating at  $60^\circ\text{C}$  for 1 h. \* denotes unidentified side products.

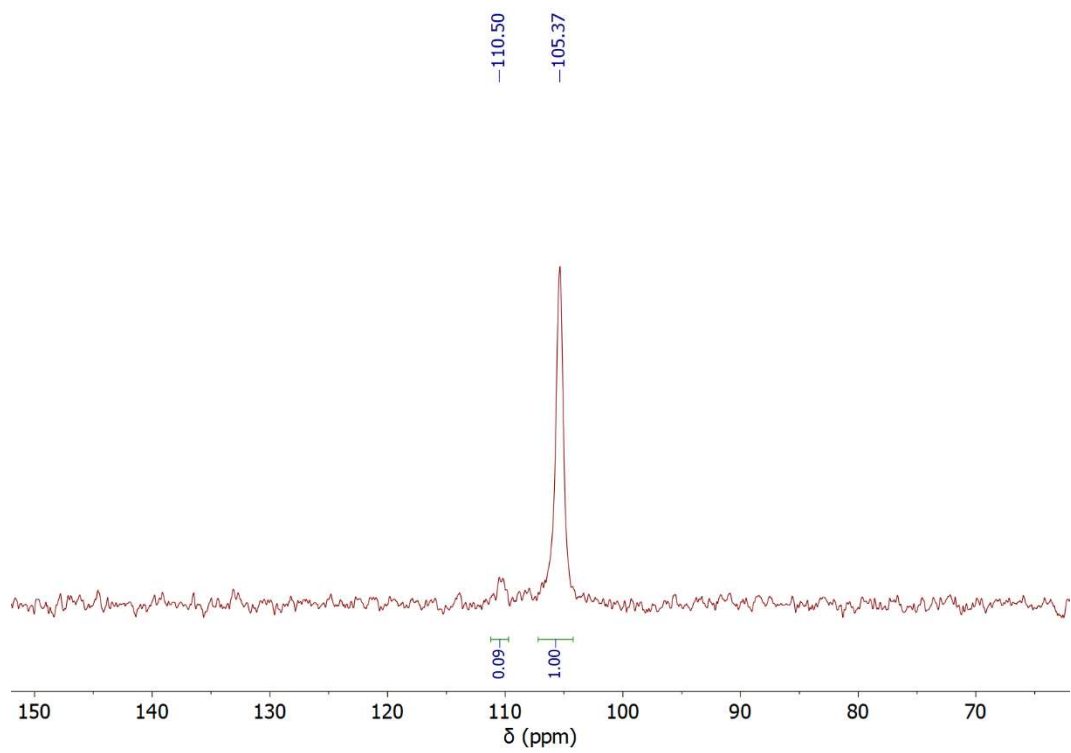

**Figure S77.**  $^{31}\text{P}\{^1\text{H}\}$  NMR spectrum of **2-Ce<sup>Na</sup>** at 3 mM concentration in 50 mM [<sup>n</sup>Bu<sub>4</sub>N][BPh<sub>4</sub>] in THF-d<sub>8</sub>. FWHM = 100 Hz for main feature at 105.37 ppm.

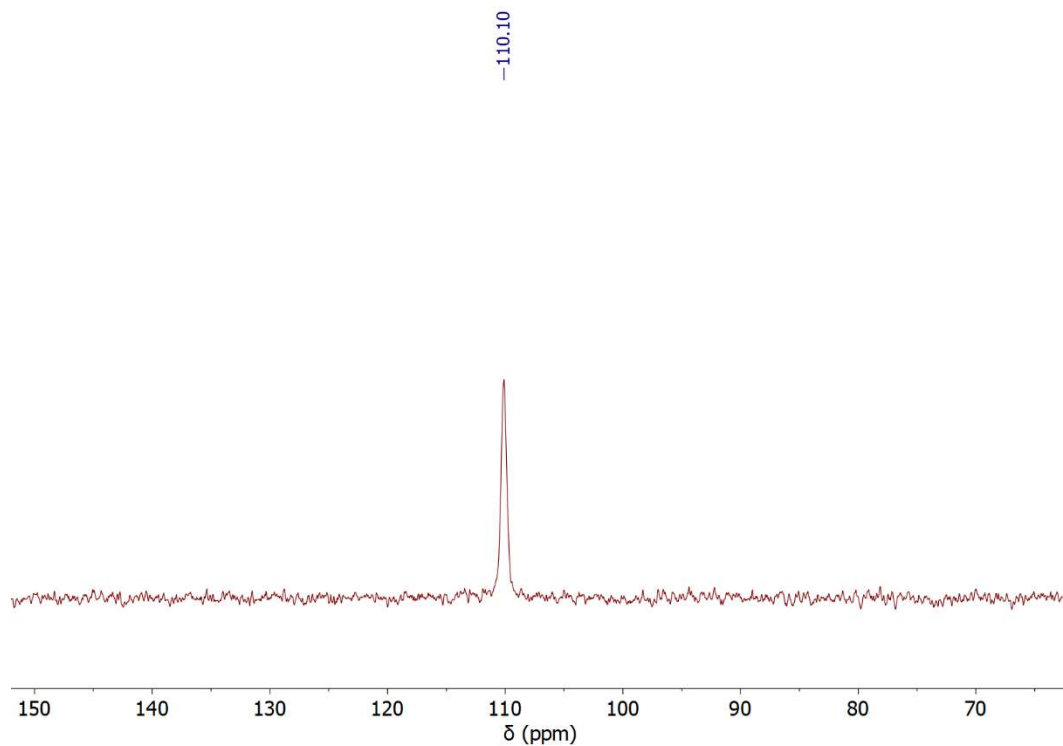

**Figure S78.**  $^{31}\text{P}\{^1\text{H}\}$  NMR spectrum of **2-Ce<sup>K</sup>** at 3 mM concentration in 50 mM [ $n\text{Bu}_4\text{N}$ ][ $\text{BPh}_4$ ] in THF- $d_8$ . FWHM = 80 Hz.

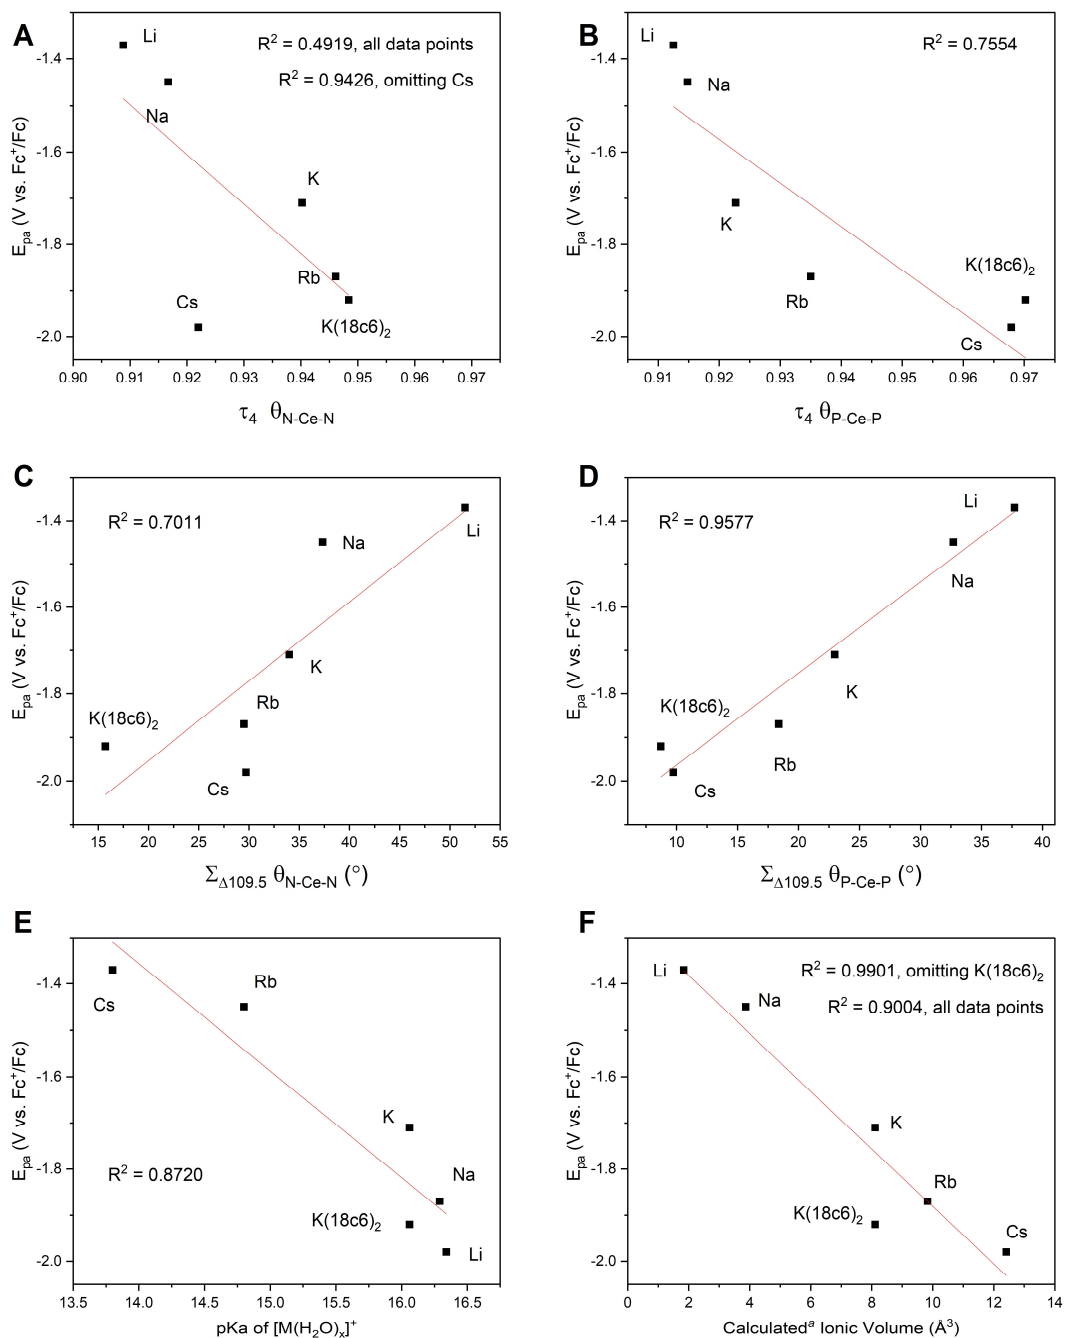

**Figure S79.** Oxidation potential ( $E_{pa}$ ) plotted vs. **A:**  $\tau_4$  calculated using angles extracted from the Ce-N coordination sphere in the SC-XRD structures. **B:**  $\tau_4$  calculated using angles extracted from the Ce-P coordination sphere in the SC-XRD structures. **C:**  $\Sigma_{\Delta 109.5}$  calculated using angles extracted from the Ce-N coordination sphere in the SC-XRD structures. **D:**  $\Sigma_{\Delta 109.5}$  calculated using angles extracted from the Ce-P coordination sphere in the SC-XRD structures. **E:**  $pK_a$  of  $[M(H_2O)_x]^+$ .<sup>5</sup> **F:** Ionic volume. Note: For **2-Ce<sup>Li</sup>** and **2-Ce<sup>Cs</sup>** two crystallographically unique molecules are in the asymmetric unit, parameters were calculated independently for each molecule and then averaged. <sup>a</sup>Calculated from Shannon ionic radius.<sup>6</sup>

## Computational Details

The **2-Ce**, **1-Ce**, and **2-Ce<sup>M</sup>** (M = Li, Na, K, Rb, Cs, [K(18c6)<sub>2</sub>]) complexes were fully optimized in the gas phase without any constraints based on their XRD structures. Optimizations of the **2-Ce<sup>Rb</sup>** and **2-Ce<sup>Cs</sup>** complexes did not include the coordinated ether molecule present in their XRD structure. All structures were optimized by using the PBE0<sup>7</sup> hybrid DFT functional as implemented in the Gaussian16 software package (version A.03).<sup>8</sup> The ECP28MWB<sup>9</sup> small core quasi-relativistic pseudopotential and ECP28MWB\_ANO<sup>10</sup> basis sets were used to describe Ce in all complexes. Rb and Cs were described with the ECP28MWB and ECP46MWB small core quasi-relativistic pseudopotentials<sup>11</sup> and ECP28MWB\_ANO and ECP46MWB\_ANO basis sets,<sup>12</sup> respectively. All remaining atoms were described with the all-electron Pople basis set 6-311G(d).<sup>13</sup> Harmonic frequency calculations were performed to confirm that the optimized structures were stationary points on the potential energy surface. The wavefunctions of the complexes were checked for stability to ensure that the calculations converged to their ground electronic states. In all calculations, spin contamination was found to be less than 0.2% with  $\langle S^2 \rangle$  values being close to the corresponding values of the considered spin states, *i.e.*, doublet for **2-Ce** and **2-Ce<sup>M</sup>** (M = Li, Na, K, Rb, Cs, [K(18c6)<sub>2</sub>]), and singlet for **1-Ce**.

The electron localization method employing Adaptive Natural Density Partitioning (AdNDP) analysis,<sup>14</sup> using the AdNDP 2.0 code,<sup>15</sup> was implemented to obtain a more chemically intuitive picture of the bonding interactions. Unpaired electrons, lone pairs of electrons, or traditional Lewis bonds can be recovered via AdNDP analysis as one-center one-electron (1c-1e), one-center two-electron (1c-2e), and two-center two-electron (2c-2e) interactions. AdNDP analysis also allows for the assignment of multicenter (nc-2e) bonds where n is equal to the number of atoms specified by the user. The occupation number (ON), which is the number of electrons occupying a particular identified localized state, serves as an indicator of bond strength. Previously, AdNDP was shown to be insensitive to the level of theory used.<sup>16-18</sup> Specifically, it was found that as long as the basis set is large enough to sufficiently describe electronic structure, AdNDP showed no qualitative dependency on the basis set. It was also shown that the AdNDP results obtained at either GGA or DFT hybrid functionals produce qualitatively the same bonding trends, in agreement with the results from CASSCF calculations.<sup>16</sup>

Time-dependent DFT calculations (TD-DFT)<sup>19,20</sup> of up to 200 excited states at the same level of theory for gas phase geometry optimizations were carried out to simulate the experimental UV-Vis spectrum of **2-Ce<sup>K18c6</sup>** in THF and all other complexes in toluene. The computed spectra were plotted broadening the calculated excitation lines with Gaussian-type peaks using a half-width at half height of 0.15 eV for all figures containing TD-DFT spectra in the main text and the SI. Natural transition orbitals (NTOs),<sup>21</sup> which most of the time can yield single electron-hole representations of the electronic excitations, were employed to interpret the calculated excitation spectra and assess the character of the orbitals that play a role in each excitation.

To calculate the redox potentials of the complexes, single-point energy calculations in THF were performed using the self-consistent reaction field approach based on the integral equation formalism of the polarized continuum model (PCM).<sup>22-24</sup> Energies of solvation were used to calculate vertical detachment energy (VDE) and adiabatic detachment energy (ADE). VDE was computed as the energy difference between the original complex and its oxidized counterpart, which has the geometry of the original complex. ADE was computed as the energy difference between the original complex and its oxidized counterpart, the geometry of which was fully optimized. All redox potentials were referenced to a calculated absolute half-cell potential of a ferrocene couple Fc<sup>+</sup>/Fc. The LANL08<sup>25-27</sup> basis set was used for Fe, and C/H atoms were described by the 6-311G(d) basis set.

MO energy level diagrams are based on the single-point energy calculations in THF. Chemissian 4.67<sup>27</sup> was used to plot the TD-DFT spectra and MO diagrams as well as visualize the NTOs. Chemcraft Version 1.8 (build 610b)<sup>28</sup> was used to visualize the molecular orbitals from the AdNDP analysis.

**Table S2.** Experimental *vs.* optimized bond lengths (Å) and angles (°). All Ce–N bonds are considered to be N<sub>terminal</sub> for **2-Ce<sup>K18c6</sup>**, **2-Ce<sup>-</sup>**, and **1-Ce**.

| Bonds/<br>Metrics                | 2-Ce <sup>Li a</sup> |                | 2-Ce <sup>Na</sup> |        | 2-Ce <sup>K</sup> |        | 2-Ce <sup>Rb</sup> |        | 2-Ce <sup>Cs a</sup> |                | 2-Ce <sup>K18c6</sup> |        | 2-Ce <sup>-</sup> |        | 1-Ce  |        |
|----------------------------------|----------------------|----------------|--------------------|--------|-------------------|--------|--------------------|--------|----------------------|----------------|-----------------------|--------|-------------------|--------|-------|--------|
|                                  | Exp.                 | Theor.         | Exp.               | Theor. | Exp.              | Theor. | Exp.               | Theor. | Exp.                 | Theor.         | Exp.                  | Theor. | Exp.              | Theor. | Exp.  | Theor. |
| Ce–M <sup>+</sup>                | 3.020<br>2.968       | 3.019<br>3.002 | 3.367              | 3.356  | 3.790             | 3.699  | 3.947              | 3.916  | 4.061<br>4.131       | 4.101<br>4.162 | 9.56                  | 9.753  | -                 | -      | -     | -      |
| Avg. Ce–N <sub>capped</sub>      | 2.395<br>2.343       | 2.406<br>2.412 | 2.372              | 2.405  | 2.376             | 2.404  | 2.380              | 2.409  | 2.393<br>2.361       | 2.409<br>2.396 | -                     | -      | -                 | -      | -     | -      |
| Avg. Ce–N <sub>terminal</sub>    | 2.302<br>2.304       | 2.292<br>2.286 | 2.297              | 2.294  | 2.313             | 2.303  | 2.329              | 2.306  | 2.311<br>2.332       | 2.311<br>2.316 | 2.339                 | 2.350  | 2.339             | 2.345  | 2.237 | 2.192  |
| Avg. N <sub>capped</sub> –P      | 1.502<br>1.578       | 1.544<br>1.546 | 1.533              | 1.540  | 1.531             | 1.539  | 1.532              | 1.539  | 1.532<br>1.534       | 1.539<br>1.536 | -                     | -      | -                 | -      | -     | -      |
| Avg. N <sub>terminal</sub> –P    | 1.553<br>1.515       | 1.546<br>1.546 | 1.526              | 1.545  | 1.530             | 1.545  | 1.535              | 1.545  | 1.542<br>1.539       | 1.545<br>1.545 | 1.504                 | 1.536  | 1.504             | 1.536  | 1.557 | 1.558  |
| Avg. Ce–N <sub>capped</sub> –P   | 173.5<br>164.7       | 169.5<br>169.9 | 172.3              | 173.6  | 168.2             | 169.5  | 161.9              | 166.4  | 163.5<br>165.3       | 165.4<br>166.1 | -                     | -      | -                 | -      | -     | -      |
| Avg. Ce–N <sub>terminal</sub> –P | 166.3<br>172.3       | 170.7<br>171.1 | 173.2              | 172.4  | 168.1             | 174.3  | 174.8              | 177.0  | 170.7<br>171.6       | 173.0<br>174.9 | 169.0                 | 167.7  | 169.0             | 168.5  | 163.0 | 169.0  |

<sup>a</sup>More than one crystallographically unique molecule is present in the asymmetric unit, metrics for each molecule are presented. The structure with its metrics given on top is denoted as (1) and the bottom is denoted as (2), here and elsewhere in the SI.

**Table S3.** Contribution of Ce atomic orbitals (%) in the bonds recovered by AdNDP. %Ce AOs in Ce–N–P  $\pi$  bonds represents the sum of the contribution for both the  $\pi$  and  $\pi_{\text{orth}}$  bonds.

|                             | %Ce AOs in Ce–N $\sigma$ bonds |                       | %Ce AOs in Ce–N–P $\pi$ bonds |                       | Total               |                       | $\Delta\%Ce$ |
|-----------------------------|--------------------------------|-----------------------|-------------------------------|-----------------------|---------------------|-----------------------|--------------|
|                             | N <sub>capped</sub>            | N <sub>terminal</sub> | N <sub>capped</sub>           | N <sub>terminal</sub> | N <sub>capped</sub> | N <sub>terminal</sub> |              |
| <b>2-Ce<sup>Li a</sup></b>  | 7.08                           | 8.17                  | 0.66                          | 3.57                  | 7.75                | 11.74                 | 3.99         |
|                             | 7.02                           | 8.25                  | 0.70                          | 3.73                  | 7.72                | 11.98                 | 4.26         |
| <b>2-Ce<sup>Na</sup></b>    | 7.21                           | 8.15                  | 0.56                          | 3.44                  | 7.77                | 11.59                 | 3.82         |
| <b>2-Ce<sup>K</sup></b>     | 7.16                           | 8.06                  | 0.61                          | 3.27                  | 7.77                | 11.33                 | 3.56         |
| <b>2-Ce<sup>Rb</sup></b>    | 7.12                           | 8.06                  | 0.67                          | 3.19                  | 7.79                | 11.25                 | 3.46         |
| <b>2-Ce<sup>Cs a</sup></b>  | 7.10                           | 7.99                  | 0.70                          | 3.08                  | 7.79                | 11.07                 | 3.28         |
|                             | 7.18                           | 7.98                  | 0.72                          | 3.01                  | 7.89                | 10.99                 | 3.10         |
| <b>2-Ce<sup>K18c6</sup></b> | -                              | 7.42                  | -                             | 1.27                  | -                   | 8.69                  | 0.00         |
| <b>2-Ce<sup>-</sup></b>     | -                              | 7.52                  | -                             | 1.46                  | -                   | 8.98                  | 0.00         |

<sup>a</sup>More than one crystallographically unique molecule is present in the asymmetric unit, metrics for each molecule are presented.

**Table S4.** Difference between the Ce–N<sub>capped</sub> and Ce–N<sub>terminal</sub> bond lengths ( $\Delta Ce-N$ , Å) for **2-Ce<sup>M</sup>**, (M = Li, Na, K, Rb, Cs).

|               | <b>2-Ce<sup>Li a</sup></b> | <b>2-Ce<sup>Na</sup></b> | <b>2-Ce<sup>K</sup></b> | <b>2-Ce<sup>Rb</sup></b> | <b>2-Ce<sup>Cs a</sup></b> |
|---------------|----------------------------|--------------------------|-------------------------|--------------------------|----------------------------|
| Exp.          | 0.093                      |                          |                         |                          | 0.029                      |
| $\Delta Ce-N$ | 0.038                      | 0.075                    | 0.063                   | 0.051                    | 0.082                      |
| Theor.        | 0.114                      |                          |                         |                          | 0.080                      |
| $\Delta Ce-N$ | 0.126                      | 0.112                    | 0.101                   | 0.103                    | 0.097                      |

<sup>a</sup>More than one crystallographically unique molecule is present in the asymmetric unit, metrics for each molecule are presented.



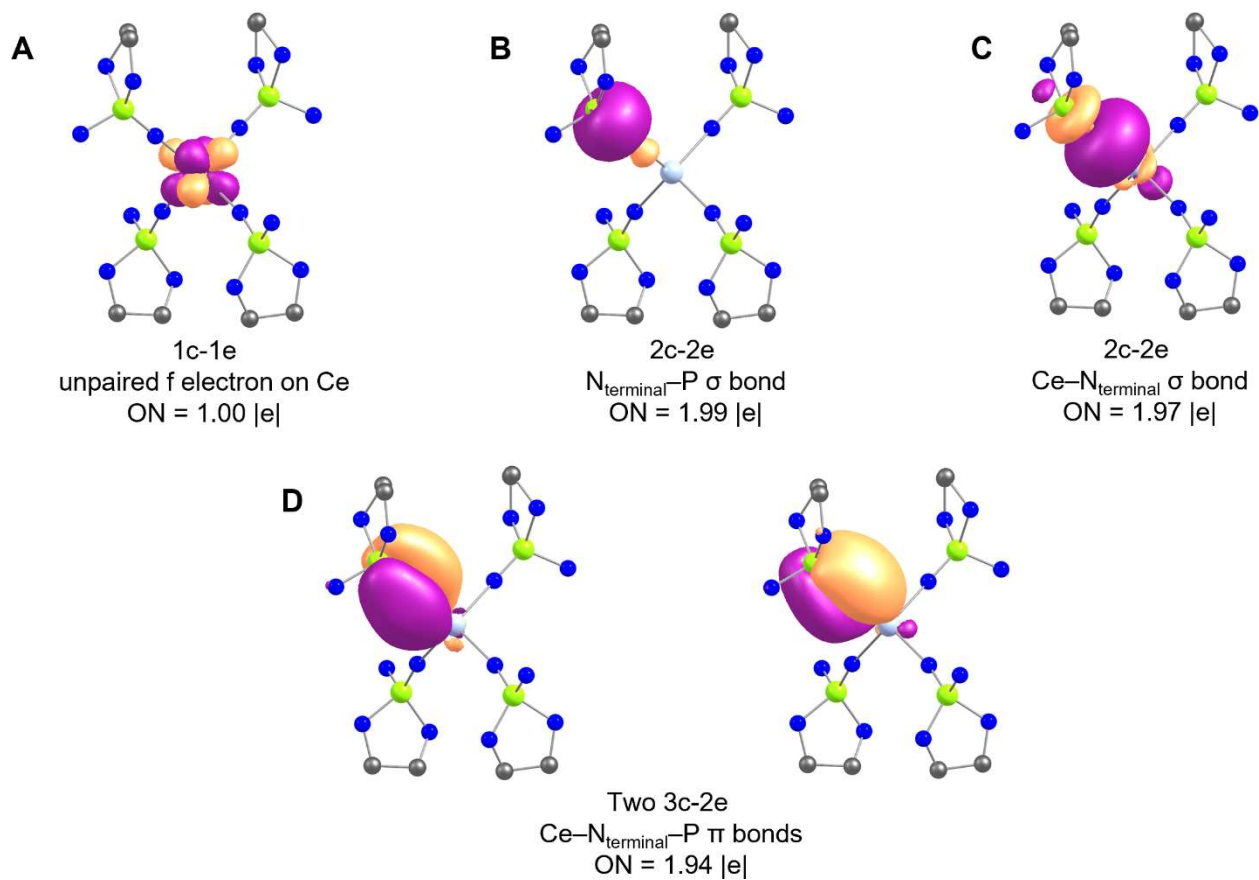

**Figure S80.** AdNDP analysis of the Ce–N–P interactions of **2-Ce<sup>-</sup>** displaying **(A)** an unpaired Ce 4*f* electron as one-center one-electron element, **(B)** two-center two-electron P–N  $\sigma$  bond, **(C)** two-center two-electron Ce–N  $\sigma$  bond, **(D)** three-center two-electron Ce–N–P  $\pi$  bonds. Side groups of the ligands (<sup>t</sup>Bu, Et<sub>2</sub>) are omitted for simplicity. An equivalent set of bonds (**B–D**) is identified for the other three ligands. ON stands for the occupation number.

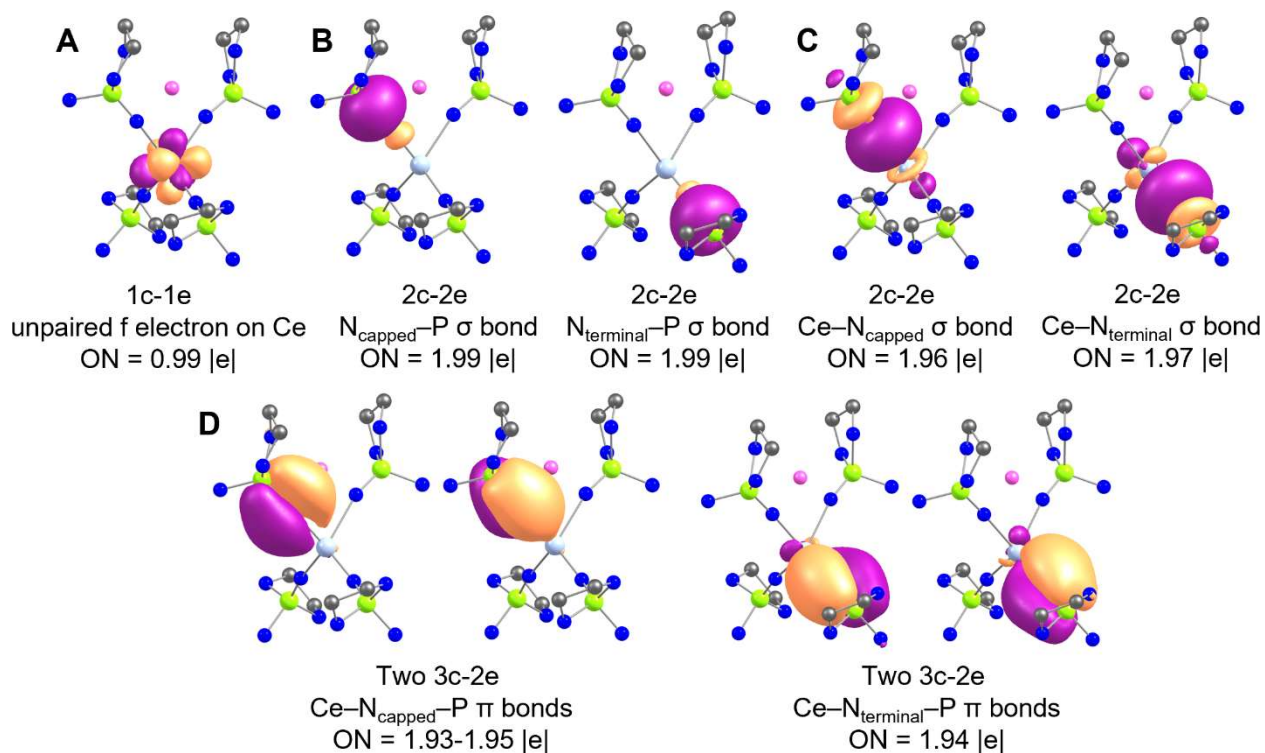

**Figure S81.** AdNDP analysis of the Ce-N-P interactions of **2-Ce<sup>II</sup>** (**1**) displaying (A) an unpaired Ce 4*f* electron as one-center one-electron element, (B) two-center two-electron P-N<sub>capped/terminal</sub>  $\sigma$  bonds, (C) two-center two-electron Ce-N<sub>capped/terminal</sub>  $\sigma$  bonds, (D) three-center two-electron Ce-N<sub>capped/terminal</sub>-P  $\pi$  bonds. Side groups of the ligands (<sup>t</sup>Bu, Et<sub>2</sub>) are omitted for simplicity. Another equivalent set of bonds (B-D) is identified for each N<sub>capped</sub> and N<sub>terminal</sub> atom. Qualitatively similar bonds are found in all other **2-Ce<sup>M</sup>** complexes. ON values for all other complexes are listed in the complimentary table below.

**Table S5.** ON values ( $|e|$ ) of the bonds recovered by AdNDP analysis for each complex.

|                                       | 1c-1e (unpaired<br>4f electron on Ce) | 2c-2e<br>N-P $\sigma$ bond |                       | 2c-2e<br>Ce-N $\sigma$ bond |                       | 3c-2e<br>Ce-N-P $\pi$ bonds |                       |
|---------------------------------------|---------------------------------------|----------------------------|-----------------------|-----------------------------|-----------------------|-----------------------------|-----------------------|
|                                       |                                       | N <sub>capped</sub>        | N <sub>terminal</sub> | N <sub>capped</sub>         | N <sub>terminal</sub> | N <sub>capped</sub>         | N <sub>terminal</sub> |
| <b>2-Ce<sup>Li</sup></b> <sup>a</sup> | 0.99                                  | 1.99                       | 1.99                  | 1.96                        | 1.97                  | 1.93-1.95                   | 1.94                  |
|                                       | 0.99                                  | 1.99                       | 1.99                  | 1.96                        | 1.97                  | 1.93-1.95                   | 1.94                  |
| <b>2-Ce<sup>Na</sup></b>              | 0.99                                  | 1.99                       | 1.99                  | 1.96                        | 1.97                  | 1.94                        | 1.94                  |
| <b>2-Ce<sup>K</sup></b>               | 0.99                                  | 1.99                       | 1.99                  | 1.96                        | 1.97                  | 1.93-1.94                   | 1.94                  |
| <b>2-Ce<sup>Rb</sup></b>              | 0.99                                  | 1.99                       | 1.99                  | 1.97                        | 1.97                  | 1.93-1.94                   | 1.94                  |
| <b>2-Ce<sup>Cs</sup></b> <sup>a</sup> | 0.99                                  | 1.99                       | 1.99                  | 1.97                        | 1.97                  | 1.93-1.94                   | 1.94                  |
|                                       | 0.99                                  | 1.99                       | 1.99                  | 1.97                        | 1.97                  | 1.93-1.94                   | 1.94                  |
| <b>2-Ce<sup>K18c6</sup></b>           | 0.99                                  | -                          | 1.99                  | -                           | 1.97                  | -                           | 1.93-1.94             |
| <b>2-Ce<sup>-</sup></b>               | 1.00                                  | -                          | 1.99                  | -                           | 1.97                  | -                           | 1.94                  |

<sup>a</sup>More than one crystallographically unique molecule is present in the asymmetric unit, metrics for each molecule are presented.

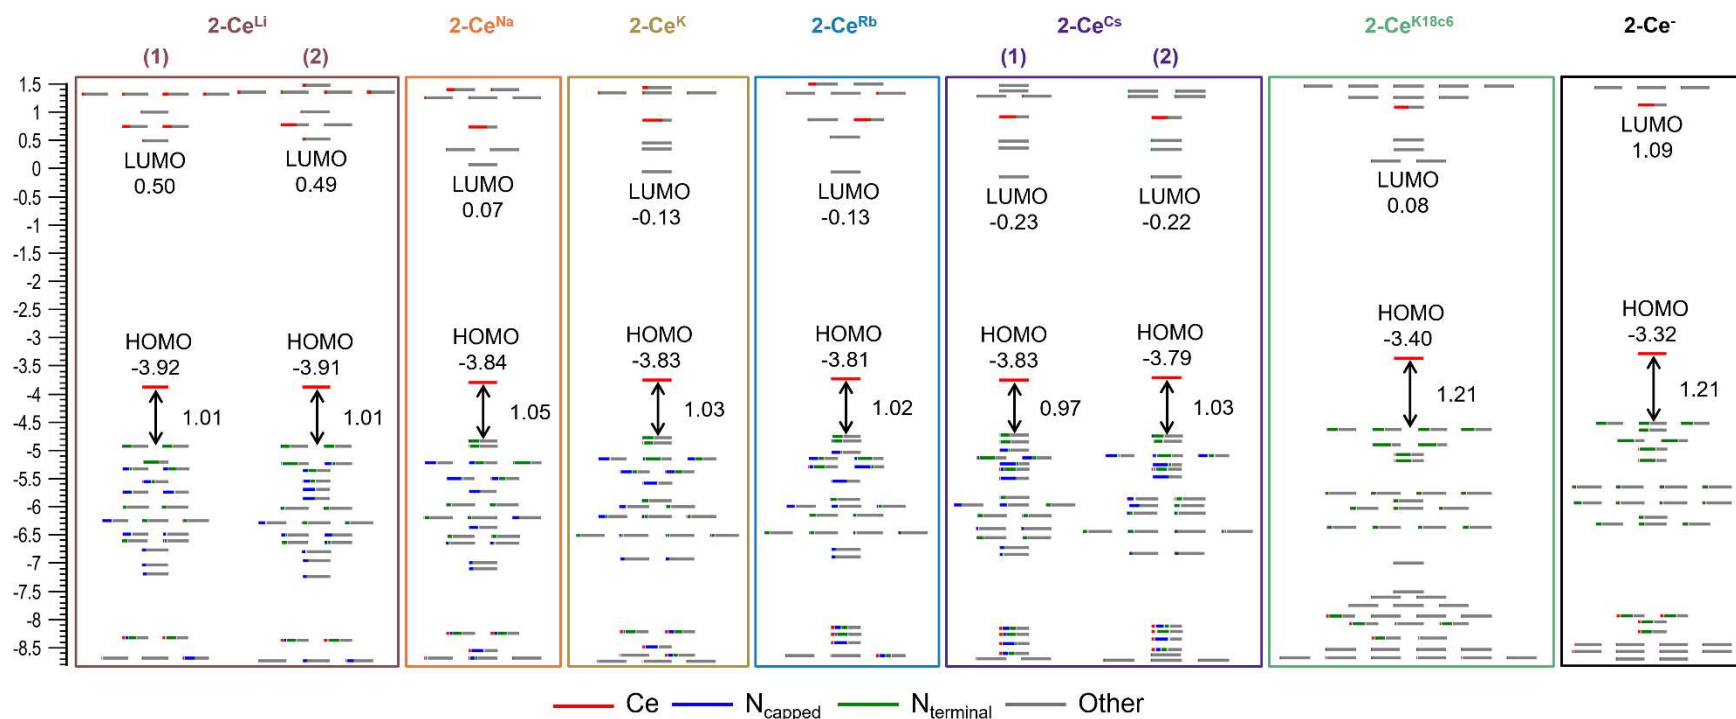

**Figure S82.**  $\alpha$  MO energy diagrams for the studied  $\text{Ce}^{3+}$  imidophosphorane complexes. The gap between the Ce-dominant HOMO and the ligand-dominant HOMO-1 is indicated by the arrow. The y-axis scale shows energy values in eV, here and in all other MO diagrams in the SI. The red portion of the MO lines represents the percentage of Ce AOs in the MOs, the blue portion represents the  $N_{\text{capped}}$  AOs, the green portion represents the  $N_{\text{terminal}}$  AOs, and the gray portion represents all other atoms AOs, here and in all other MO diagrams in the SI. Degeneracy of the MO energy levels is set to 0.085 eV for visualization purposes, here and in all other MO diagrams in the SI.

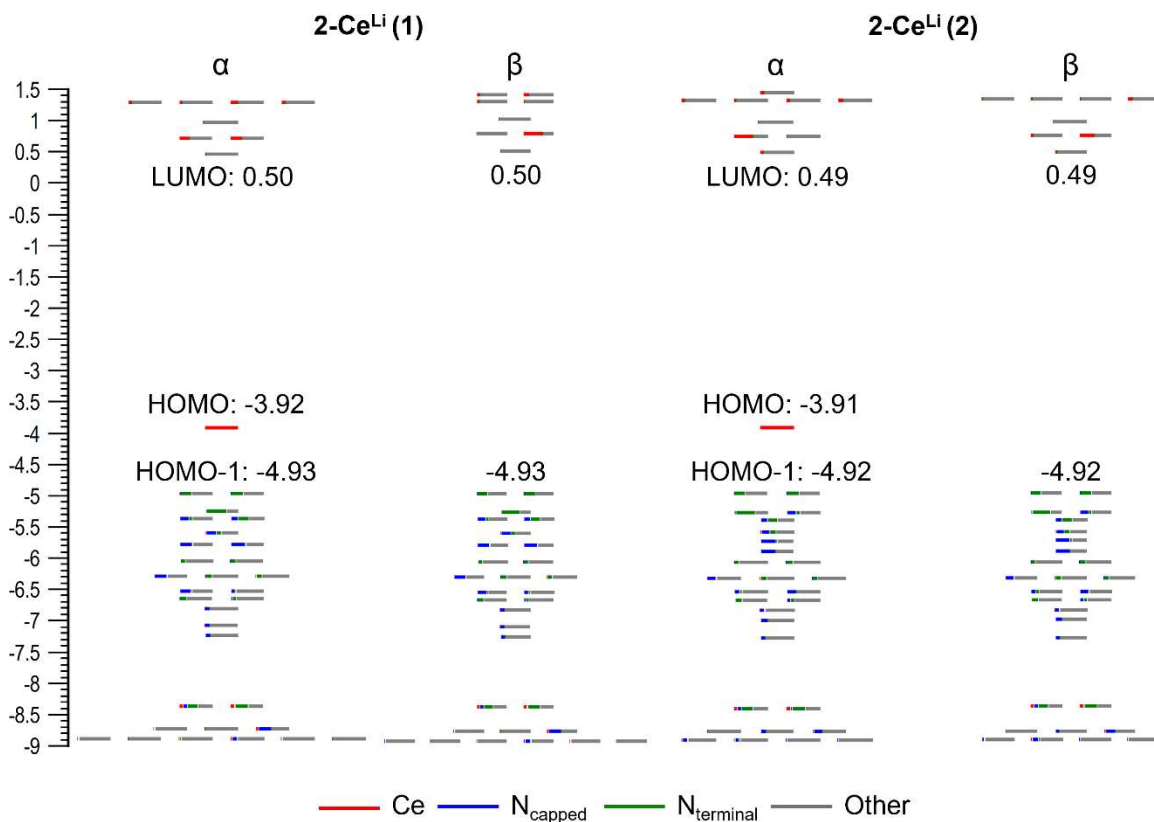

Figure S83.  $\alpha$  and  $\beta$  MO energy levels for both crystallographically unique  $2\text{-Ce}^{\text{Li}}$  complexes.

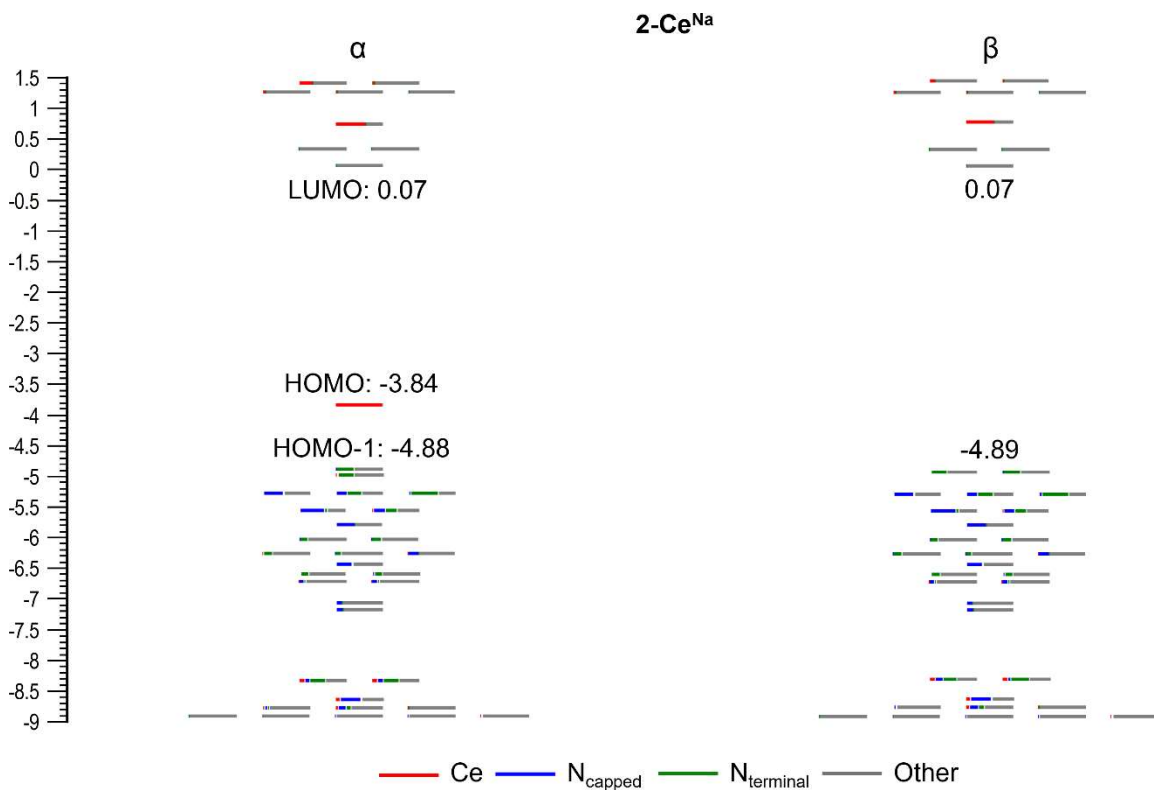

Figure S84.  $\alpha$  and  $\beta$  MO energy levels for the  $2\text{-Ce}^{\text{Na}}$  complex.

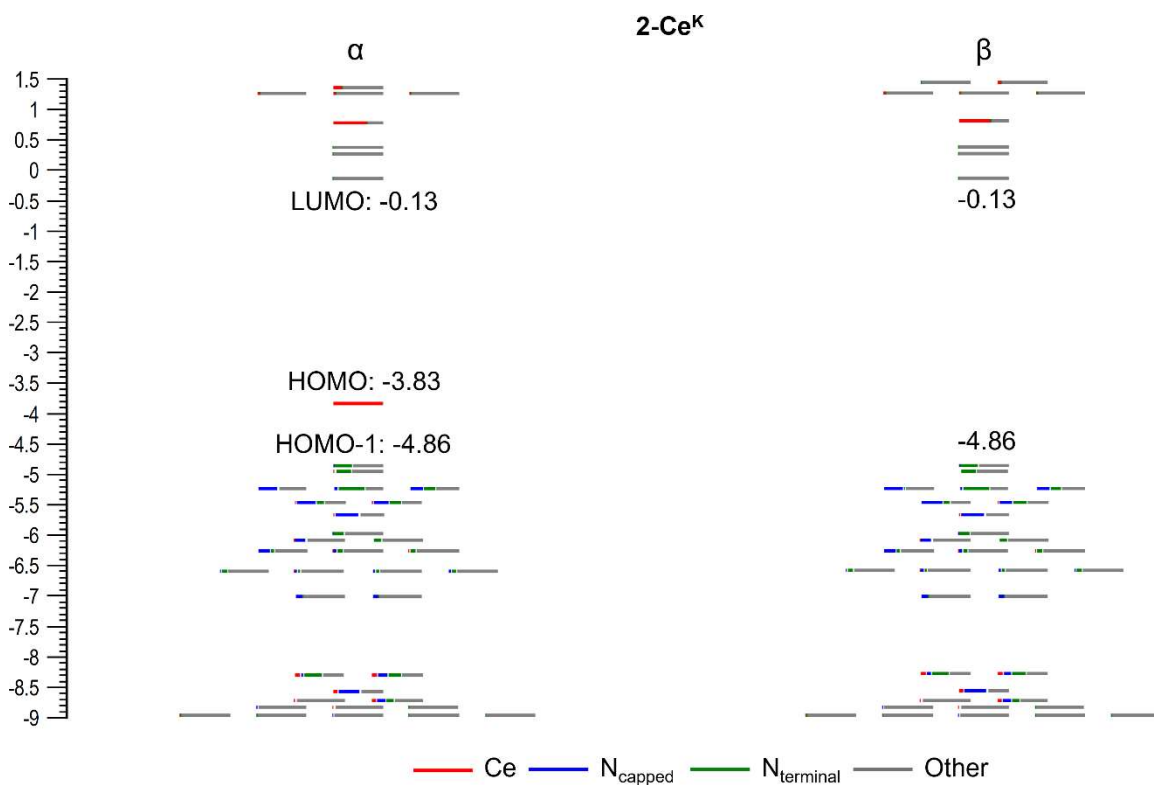

**Figure S85.**  $\alpha$  and  $\beta$  MO energy levels for the **2-Ce<sup>K</sup>** complex.

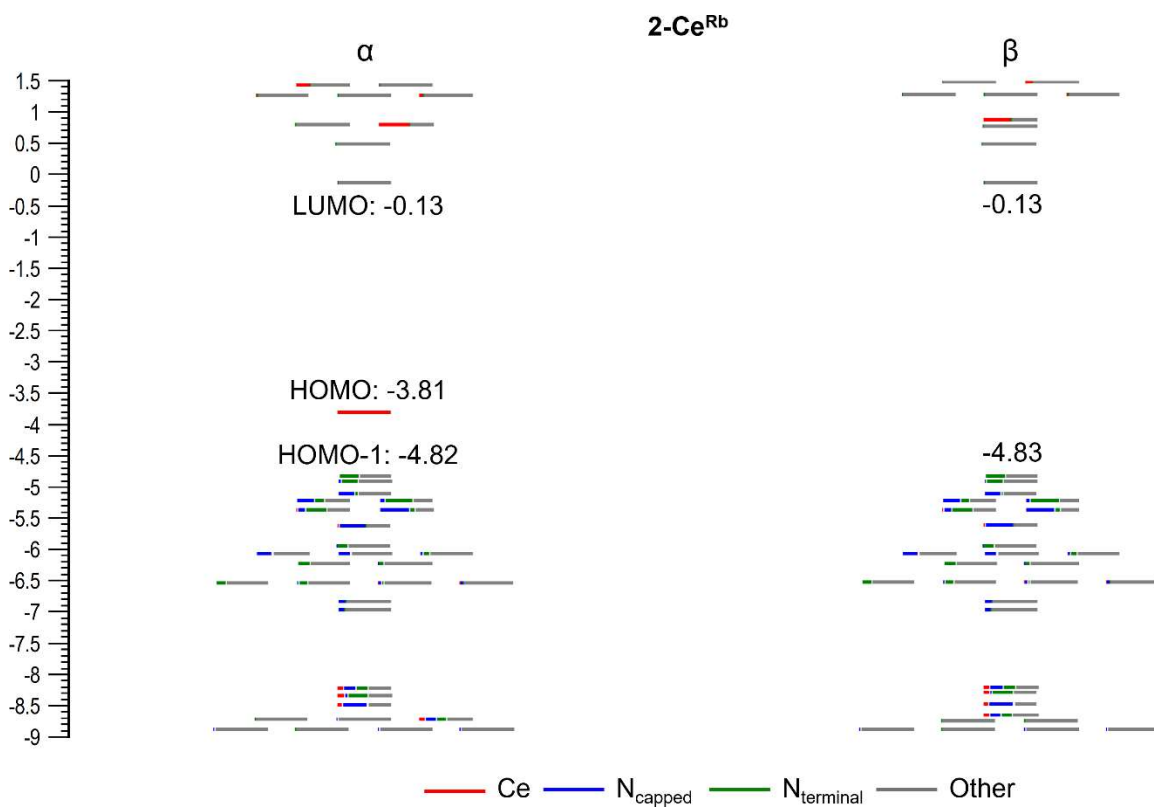

**Figure S86.**  $\alpha$  and  $\beta$  MO energy levels for the **2-Ce<sup>Rb</sup>** complex.

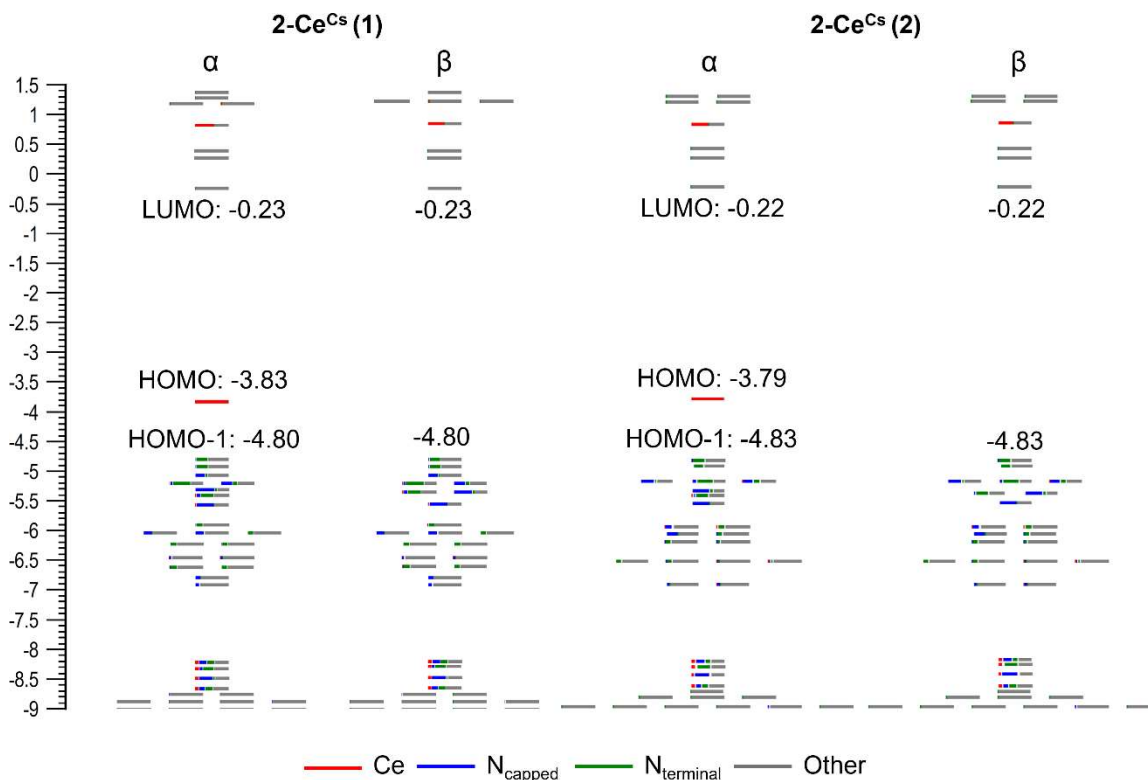

Figure S87.  $\alpha$  and  $\beta$  MO energy levels for both crystallographically unique  $2\text{-Ce}^{\text{Cs}}$  complexes.

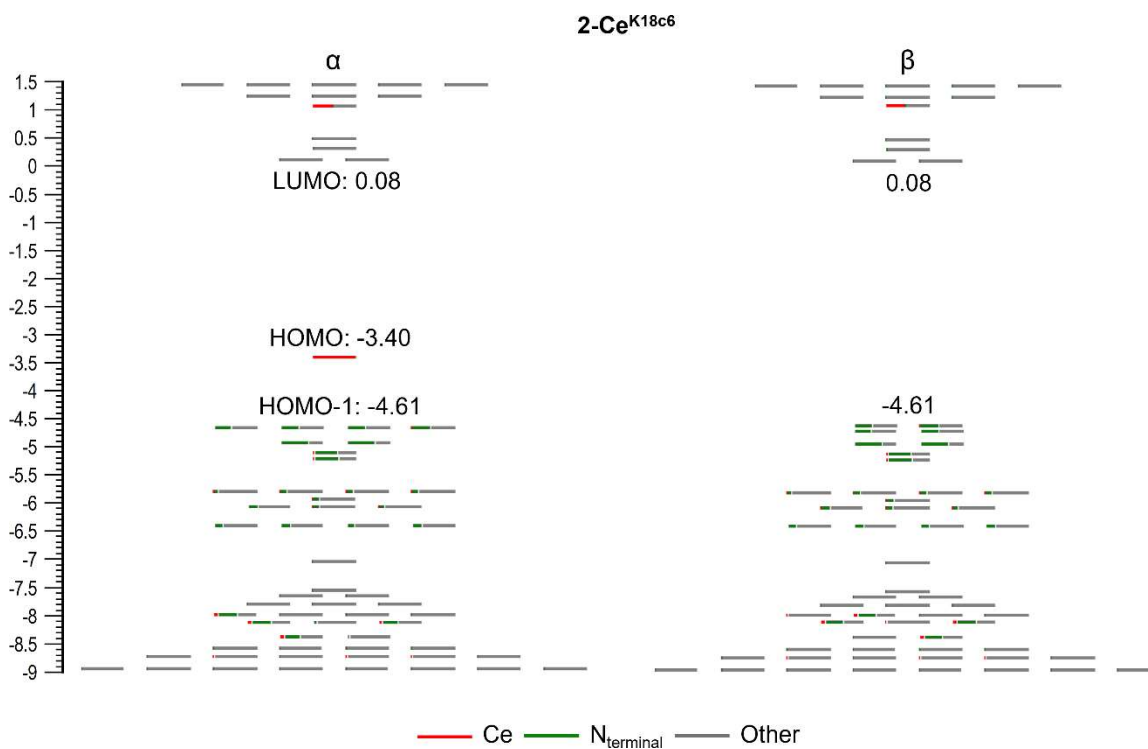

Figure S88.  $\alpha$  and  $\beta$  MO energy levels for the  $2\text{-Ce}^{\text{K18c6}}$  complex.

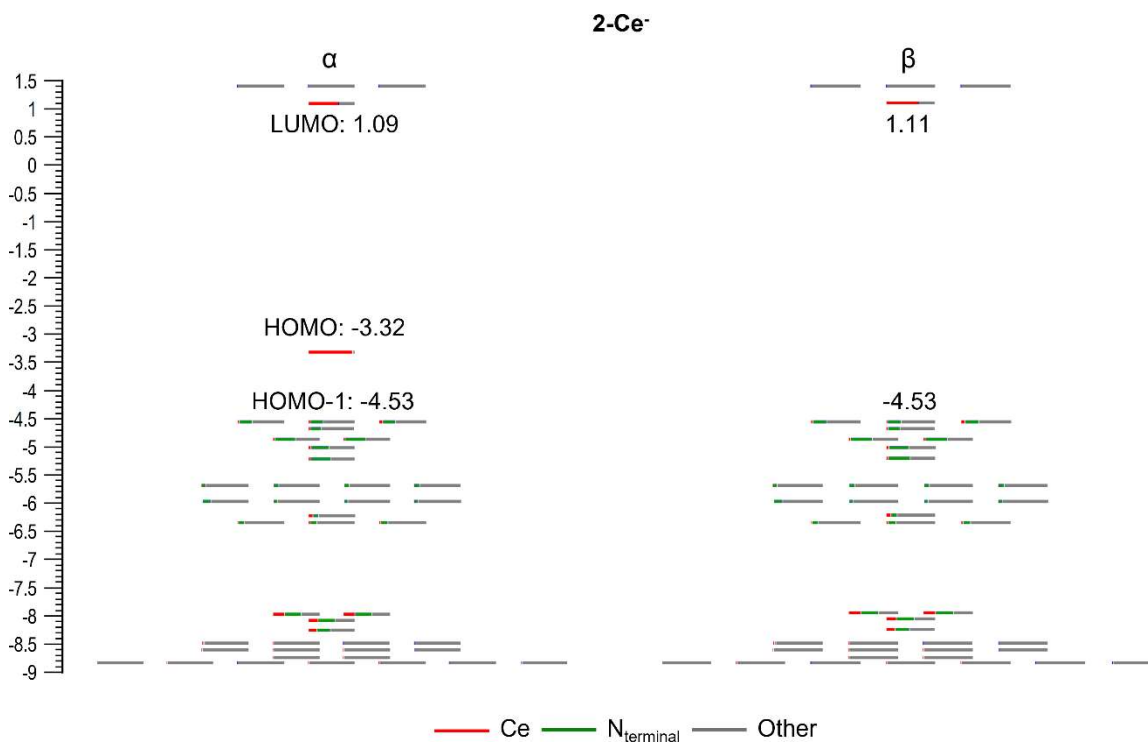

**Figure S89.**  $\alpha$  and  $\beta$  MO energy levels for the 2-Ce<sup>+</sup> complex.

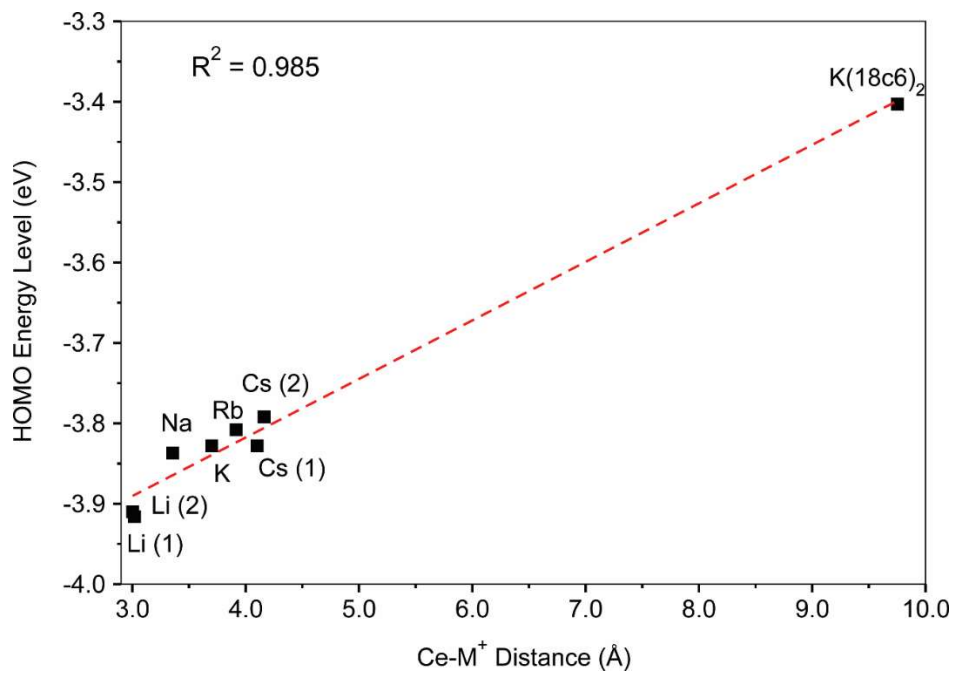

**Figure S90.** Correlation between the optimized Ce-M<sup>+</sup> distance and HOMO energy level.



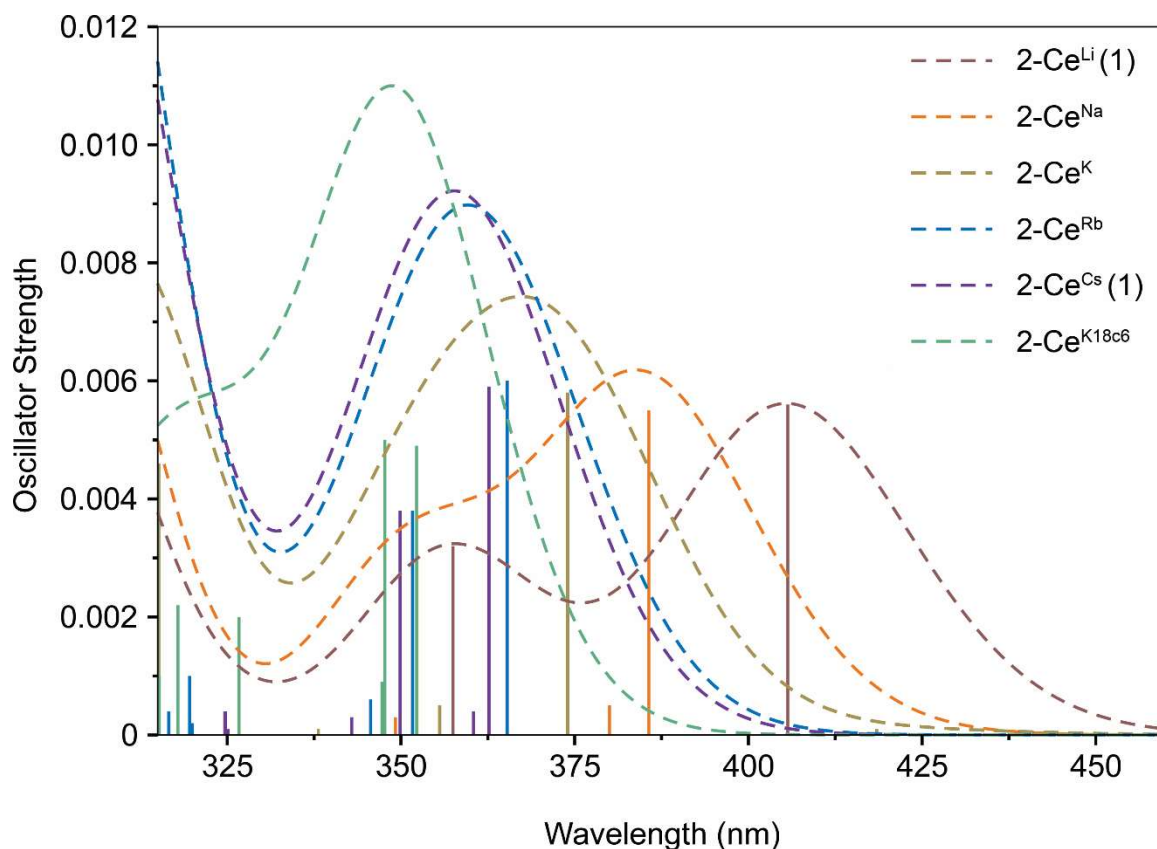

**Figure S91.** Calculated TD-DFT spectra overlaid with bars representing oscillator strength values. The half-width at half height is set to 0.15 eV, here and elsewhere in the SI. For clarity, the TD-DFT spectrum of only **2-Ce<sup>Li</sup>(1)** and **2-Ce<sup>Cs</sup>(1)** are shown for the complexes with crystallographically unique structures.

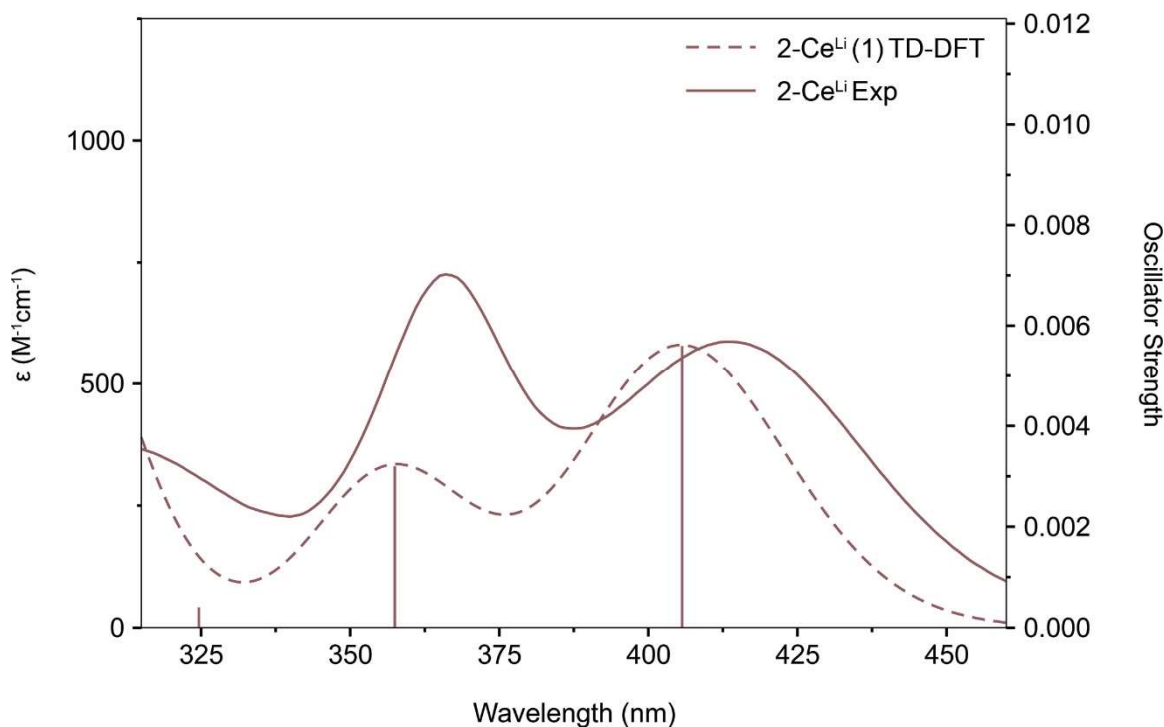

**Figure S92.** Overlap of TD-DFT and UV-Vis spectrum for **2-Ce<sup>Li</sup>(1)**.

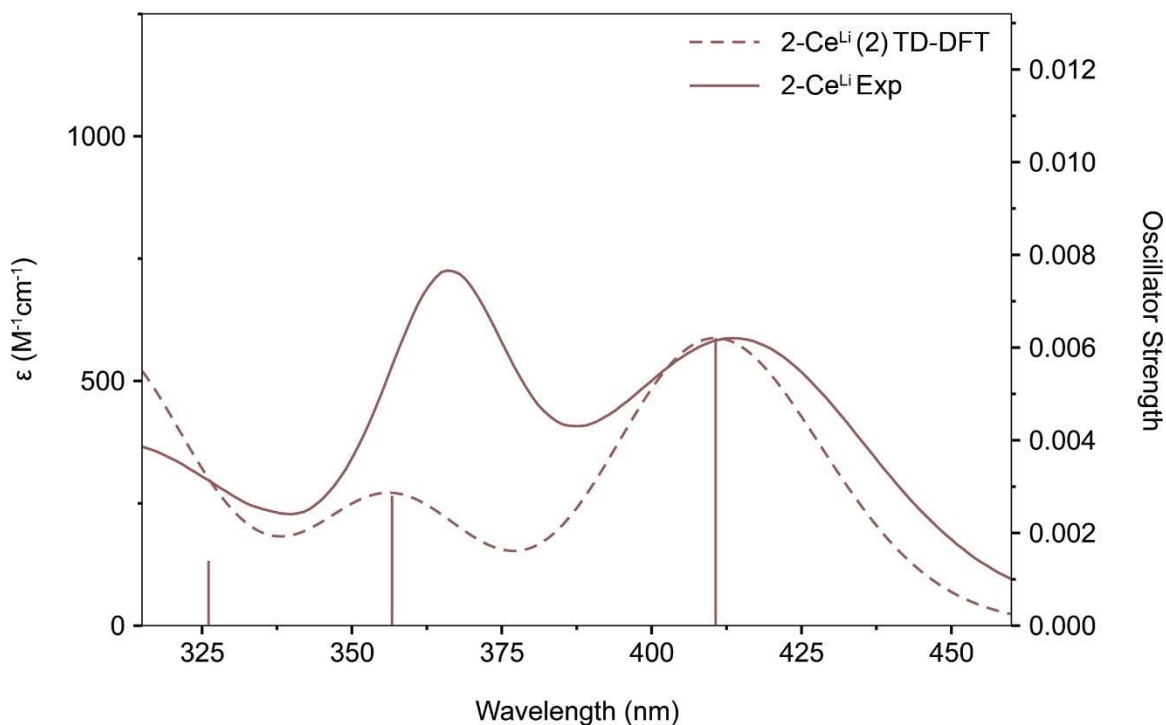

Figure S93. Overlap of TD-DFT and UV-Vis spectrum for **2-Ce<sup>Li</sup>** (2).

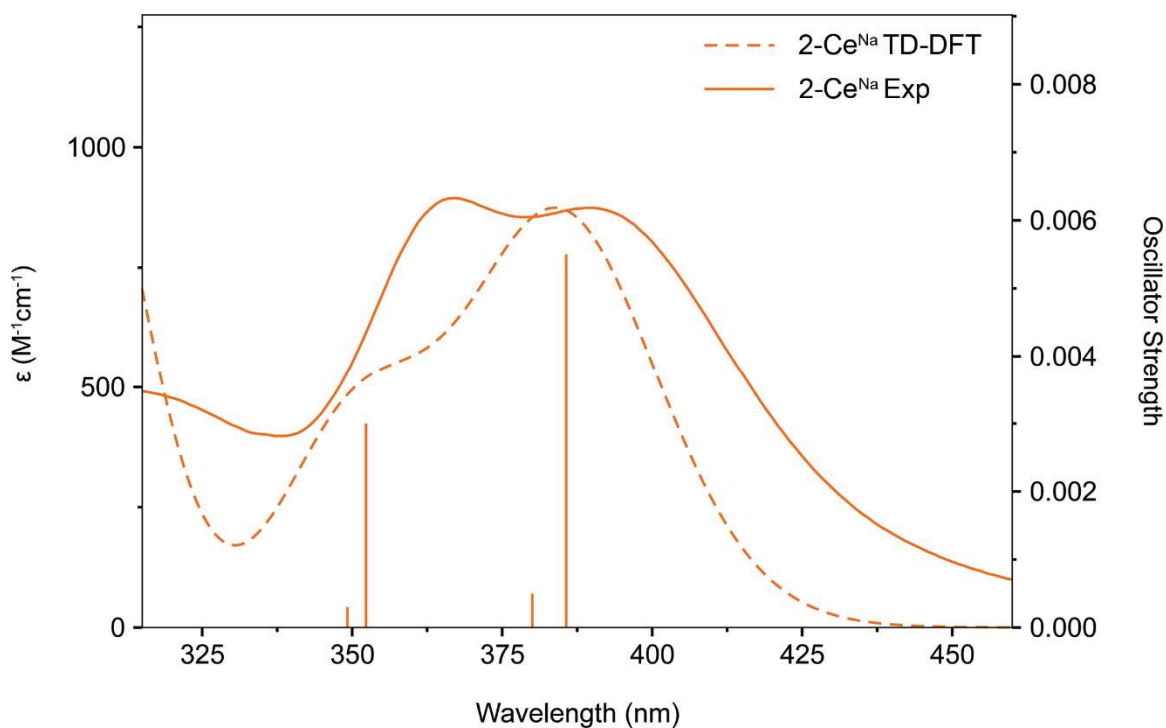

Figure S94. Overlap of TD-DFT and UV-Vis spectrum for **2-Ce<sup>Na</sup>**.

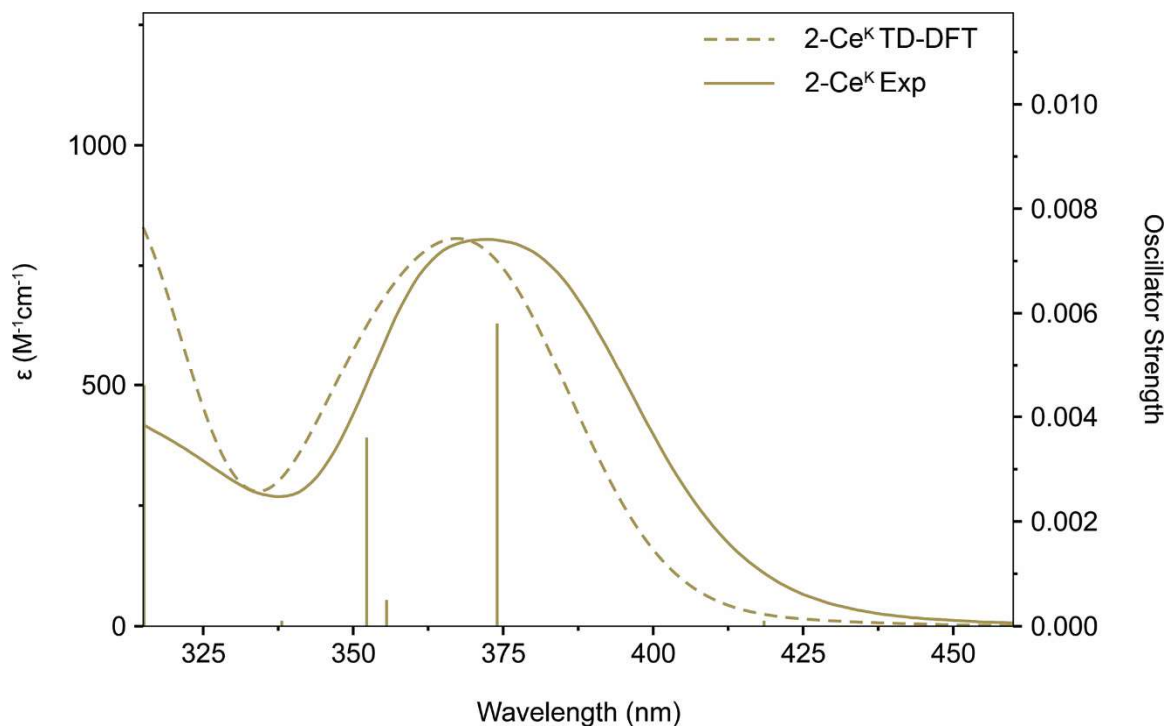

Figure S95. Overlap of TD-DFT and UV-Vis spectrum in for **2-Ce<sup>K</sup>**.

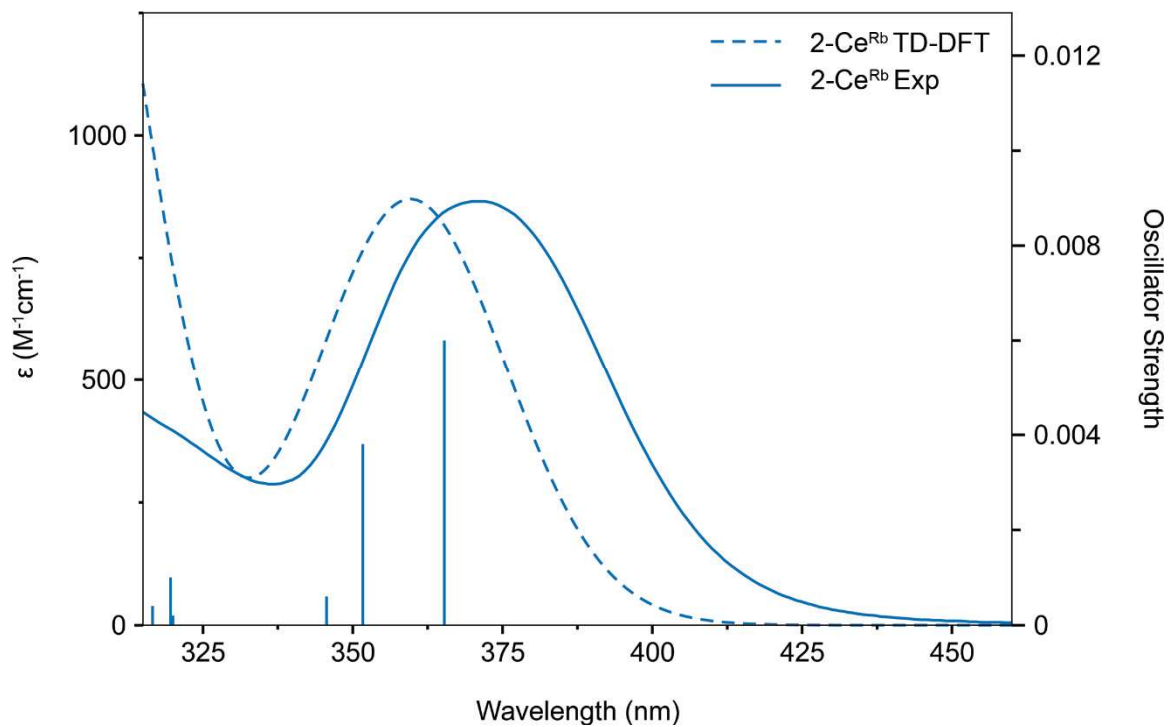

Figure S96. Overlap of TD-DFT and UV-Vis spectrum for **2-Ce<sup>Rb</sup>**.

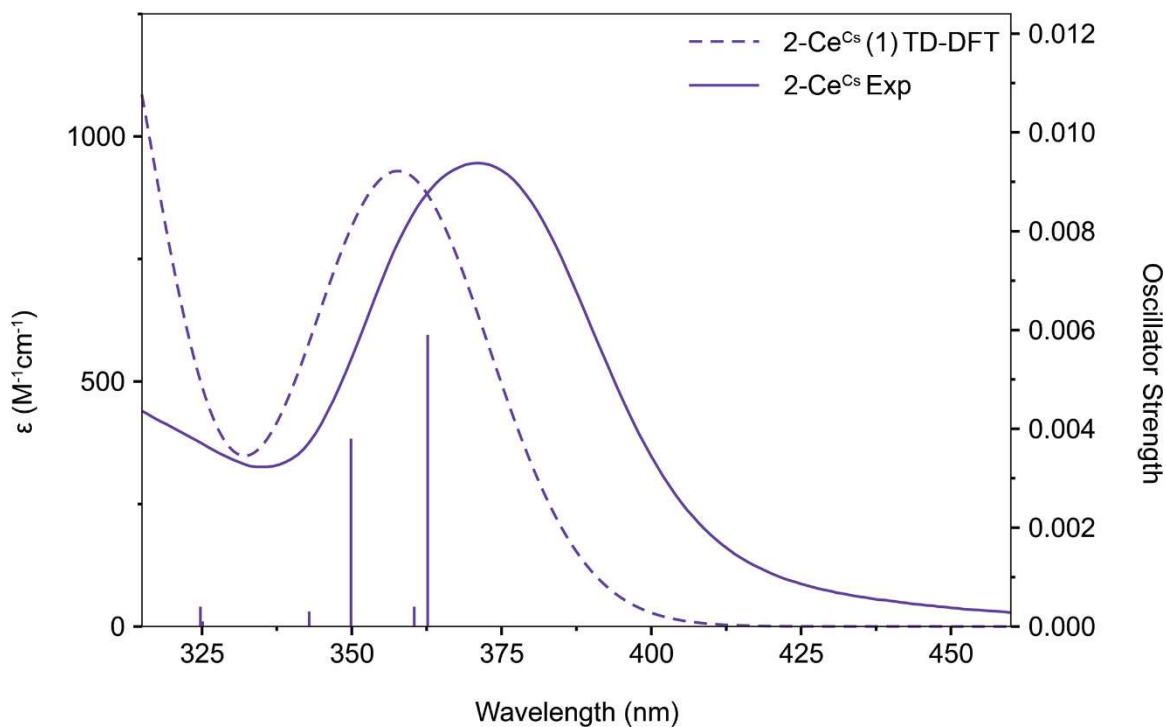

Figure S97. Overlap of TD-DFT and UV-Vis spectrum for 2-Ce<sup>Cs</sup> (1).

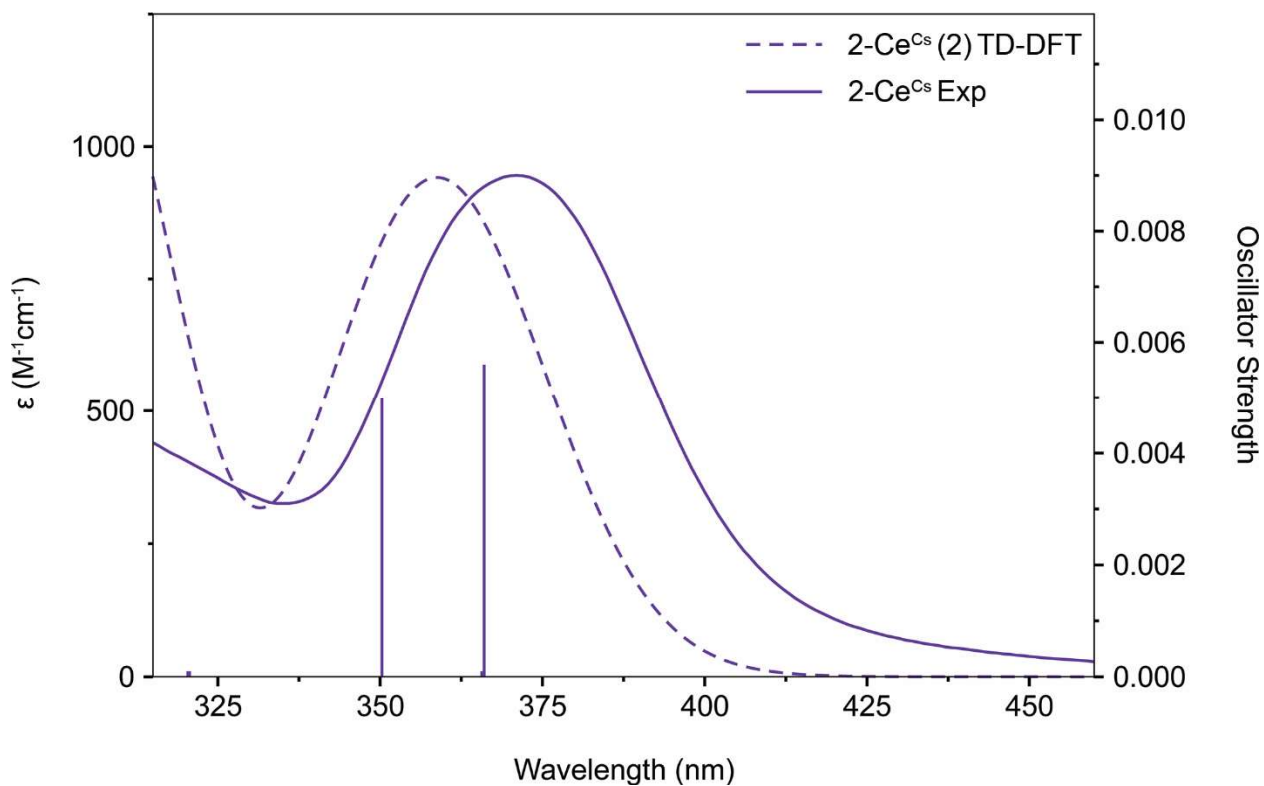

Figure S98. Overlap of TD-DFT and UV-Vis spectrum for 2-Ce<sup>Cs</sup> (2).

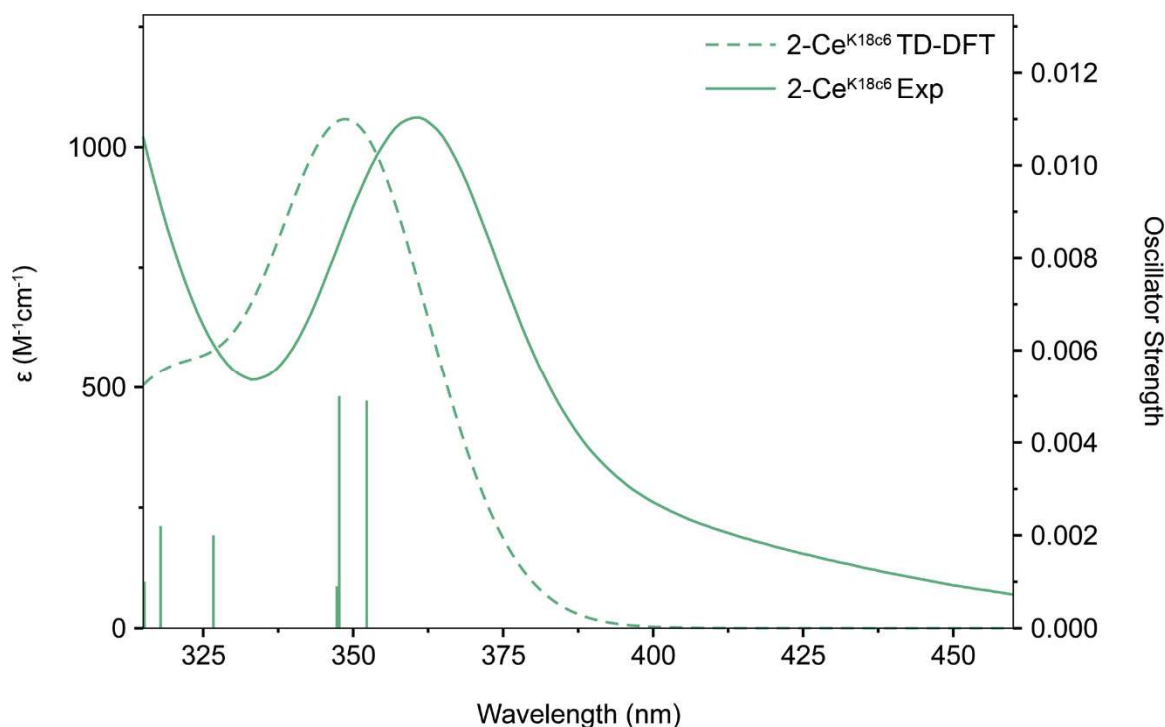

**Figure S99.** Overlap of TD-DFT and UV-Vis spectrum for **2-Ce<sup>K18c6</sup>**.

**Table S6.** Peak analysis of the  $4f5d$  transitions in the UV-Vis and calculated TD-DFT spectra.

| Complex                     | Position of peaks/transitions  | Gap between peaks/transitions |
|-----------------------------|--------------------------------|-------------------------------|
|                             | Exp. [Theor.]                  | Exp. [Theor.]                 |
| <b>2-Ce<sup>Li a</sup></b>  | 363/414 [357/406]<br>[357/411] | 51 [48]<br>[54]               |
| <b>2-Ce<sup>Na</sup></b>    | 360/393 [352/385]              | 31 [33]                       |
| <b>2-Ce<sup>K</sup></b>     | 371 [352/374]                  | [22]                          |
| <b>2-Ce<sup>Rb</sup></b>    | 371 [352/365]                  | [13]                          |
| <b>2-Ce<sup>Cs a</sup></b>  | 371 [350/363]<br>[350/366]     | [13]<br>[16]                  |
| <b>2-Ce<sup>K18c6</sup></b> | 361 [348/352]                  | [4]                           |

<sup>a</sup>More than one crystallographically unique molecule is present in the asymmetric unit, metrics for each molecule are presented.

**Table S7.** Wavelength, probability (%NTO pair), oscillator strength (f), and the contribution of original principal Kohn-Sham orbitals for the major 4*f*5*d* excited state transitions with the two largest amplitudes for each 2-Ce<sup>M</sup> complex.

|                                      | $\lambda_{\max}$ (nm) | %NTO pair | f     | Major contributors                        |
|--------------------------------------|-----------------------|-----------|-------|-------------------------------------------|
| <b>2-Ce<sup>Li</sup><sub>a</sub></b> | 405.6                 | 86%       | 0.006 | HOMO→LUMO+2 (38.4%) HOMO→LUMO+10 (17.6%)  |
|                                      | 410.7                 | 86%       | 0.006 | HOMO→LUMO+2 (34.8%) HOMO→LUMO+10 (17.6%)  |
|                                      | 357.5                 | 84%       | 0.003 | HOMO→LUMO+12 (34.8%) HOMO→LUMO+18 (14.4%) |
|                                      | 356.7                 | 86%       | 0.003 | HOMO→LUMO+14 (25.0%) HOMO→LUMO+17 (18.5%) |
| <b>2-Ce<sup>Na</sup></b>             | 385.7                 | 87%       | 0.005 | HOMO→LUMO+3 (23.0%) HOMO→LUMO+12 (13.7%)  |
|                                      | 352.3                 | 86%       | 0.003 | HOMO→LUMO+16 (25.0%) HOMO→LUMO+26 (13.7%) |
| <b>2-Ce<sup>K</sup></b>              | 374.0                 | 87%       | 0.006 | HOMO→LUMO+14 (22.1%) HOMO→LUMO+3 (15.2%)  |
|                                      | 352.3                 | 87%       | 0.004 | HOMO→LUMO+13 (19.4%) HOMO→LUMO+27 (12.3%) |
| <b>2-Ce<sup>Rb</sup></b>             | 365.3                 | 85%       | 0.006 | HOMO→LUMO+16 (26.0%) HOMO→LUMO+3 (13.7%)  |
|                                      | 351.7                 | 85%       | 0.004 | HOMO→LUMO+14 (20.3%) HOMO→LUMO+28 (11.6%) |
| <b>2-Ce<sup>Cs</sup><sub>a</sub></b> | 362.7                 | 85%       | 0.006 | HOMO→LUMO+13 (19.4%) HOMO→LUMO+15 (9.6%)  |
|                                      | 366.0                 | 87%       | 0.006 | HOMO→LUMO+16 (23.0%) HOMO→LUMO+13 (19.4%) |
|                                      | 349.9                 | 85%       | 0.004 | HOMO→LUMO+15 (14.4%) HOMO→LUMO+18 (13.0%) |
|                                      | 350.3                 | 86%       | 0.005 | HOMO→LUMO+13 (24.0%) HOMO→LUMO+27 (13.7%) |
| <b>2-Ce<sup>K18c6</sup></b>          | 352.3                 | 78%       | 0.005 | HOMO→LUMO+30 (15.2%) HOMO→LUMO+36 (10.9%) |
|                                      | 347.7                 | 81%       | 0.005 | HOMO→LUMO+40 (13.0%) HOMO→LUMO+50 (11.6%) |

<sup>a</sup>More than one crystallographically unique molecule is present in the asymmetric unit, metrics for each molecule are presented.

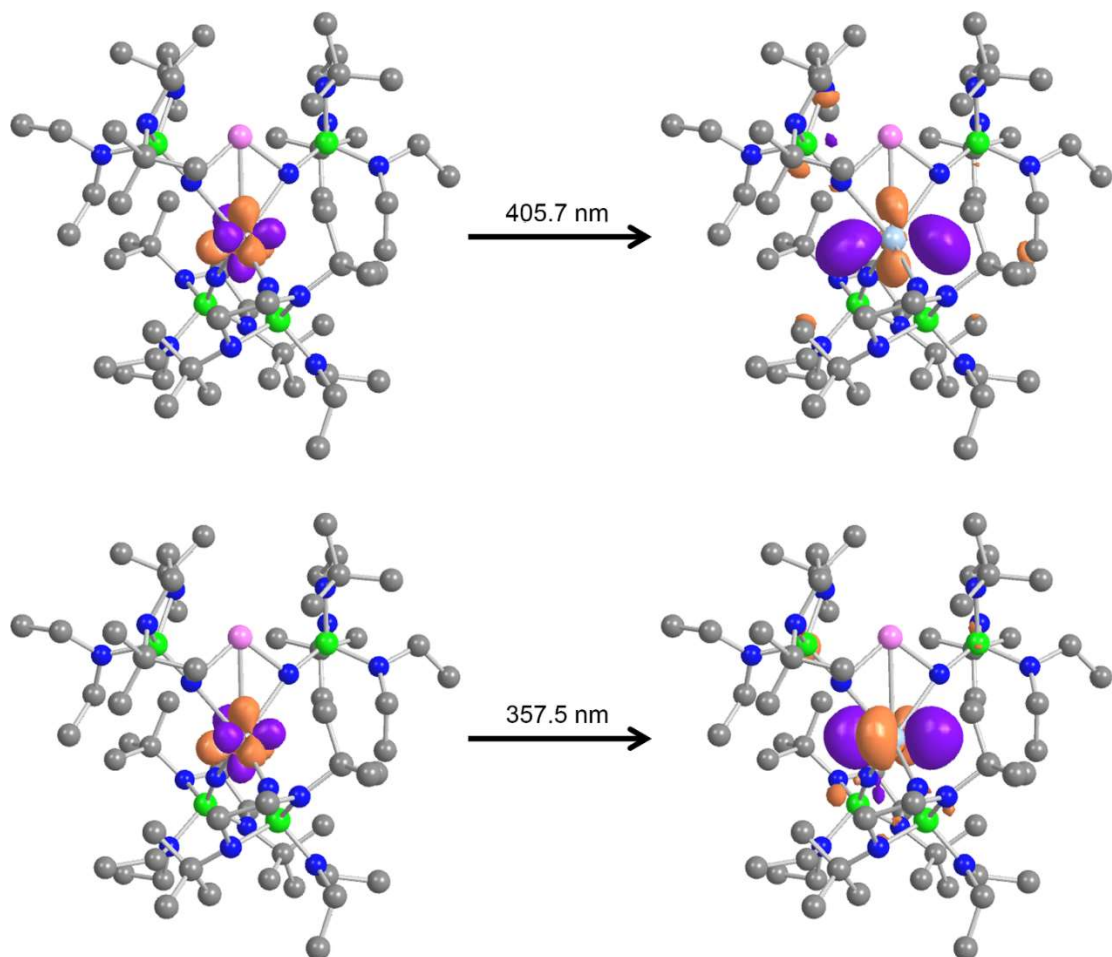

**Figure S100.** Dominant NTO pairs (“hole” (on the left) → “particle” (on the right)) corresponding to the  $4f \rightarrow 5d$  transitions with the highest oscillator strength values within the  $\sim 340$ - $450$  nm range of **2-Ce<sup>III</sup>(1)**. Cylinders connecting atoms do not necessarily represent bonds between atoms, here and in subsequent NTO figures. Atom colors are as follows here and in subsequent NTO figures: C, gray; N, dark blue; P, green; Ce, sky blue. The Li atom is colored pink.

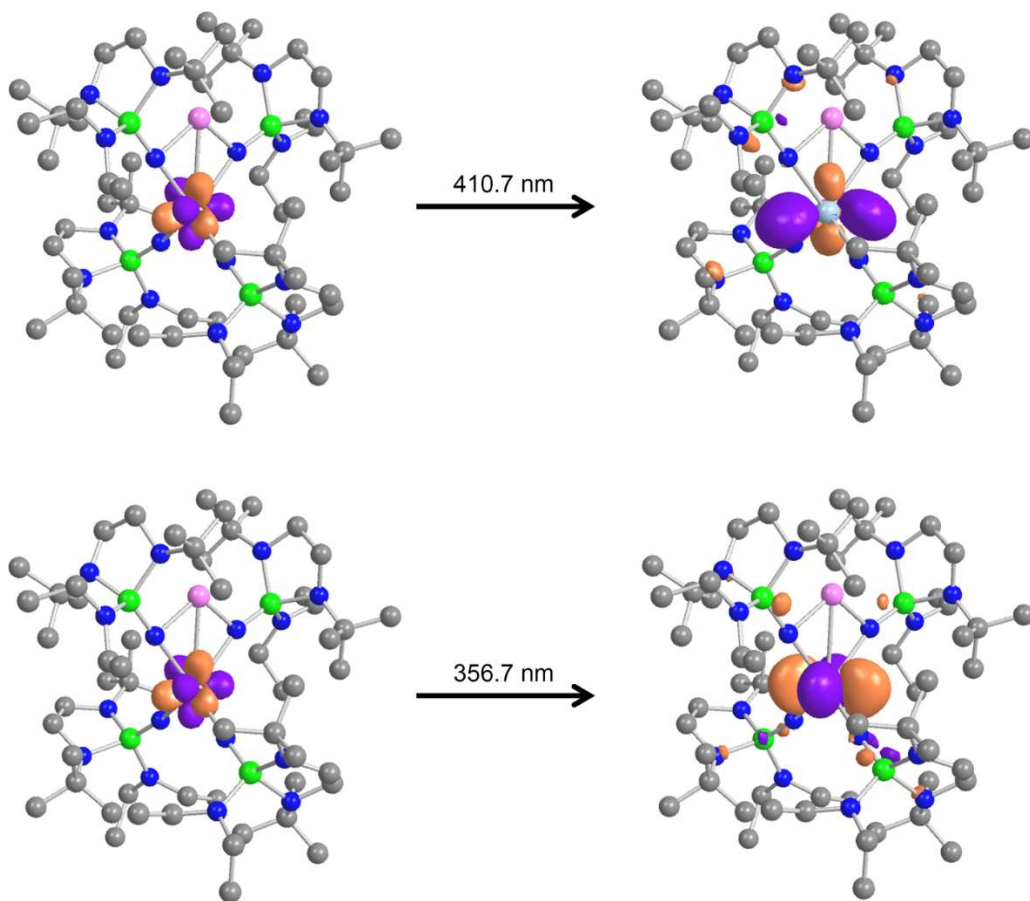

**Figure S101.** Dominant NTO pairs (“hole” (on the left) → “particle” (on the right)) corresponding to the  $4f \rightarrow 5d$  transitions with the highest oscillator strength values within the  $\sim 340$ - $450$  nm range of **2-Ce<sup>III</sup>(2)**.



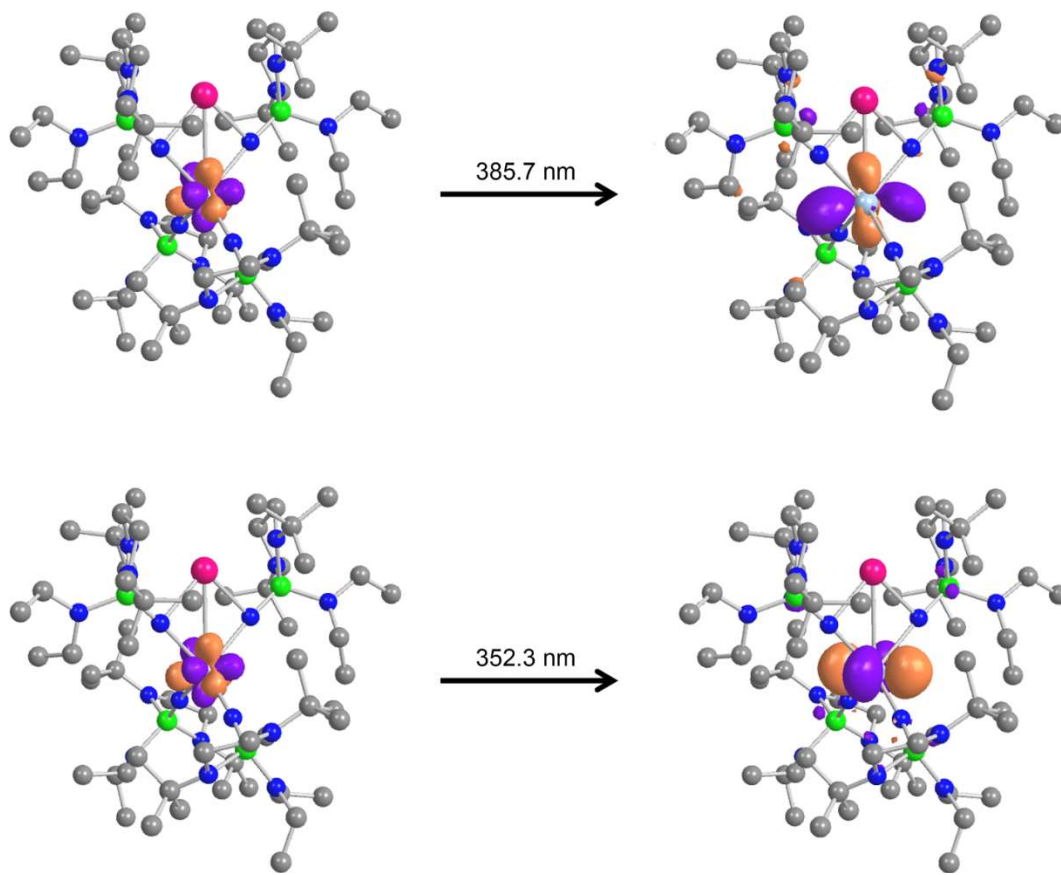

**Figure S102.** Dominant NTO pairs (“hole” (on the left) → “particle” (on the right)) corresponding to the  $4f \rightarrow 5d$  transitions with the highest oscillator strength values within the  $\sim 340$ - $450$  nm range of **2-Ce<sup>Na</sup>**. The Na atom is colored rose.

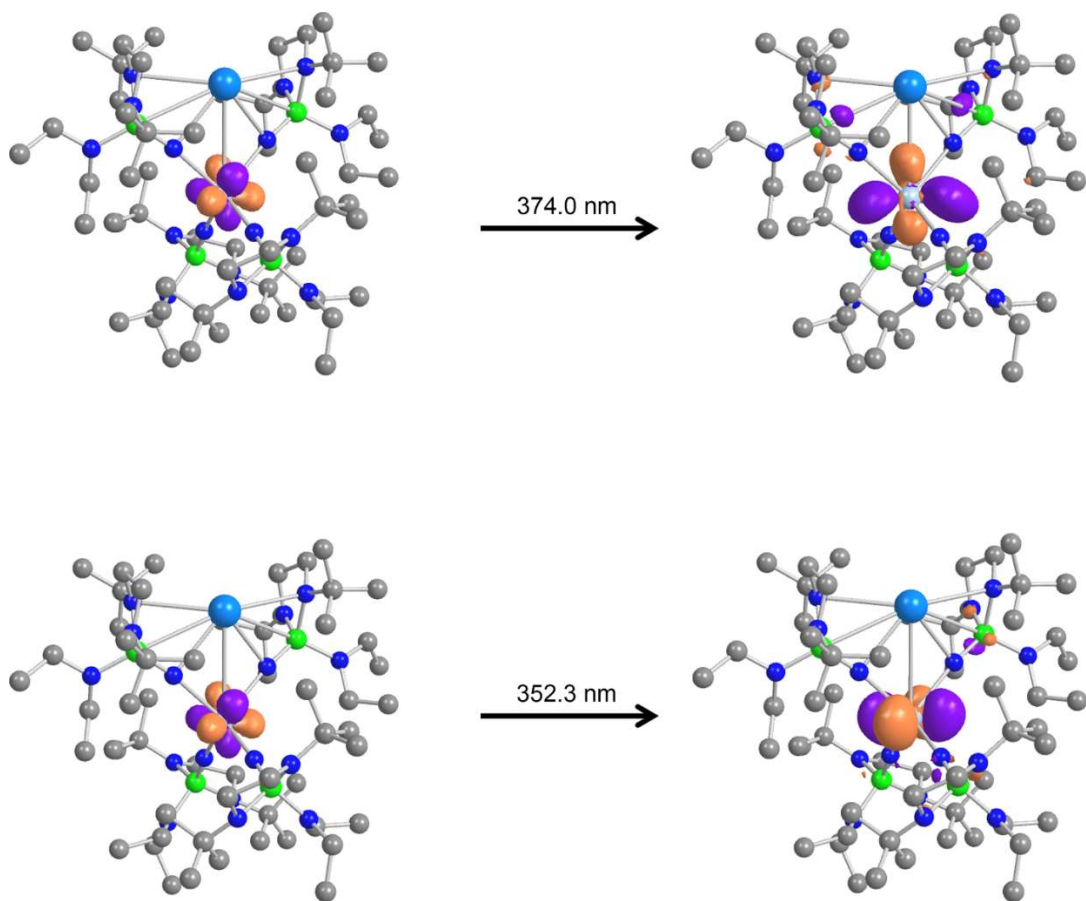

**Figure S103.** Dominant NTO pairs ("hole" (on the left)  $\rightarrow$  "particle" (on the right)) corresponding to the  $4f \rightarrow 5d$  transitions with the highest oscillator strength values within the  $\sim 340\text{-}450$  nm range of  $2\text{-CeK}$ . The K atom is colored blue.

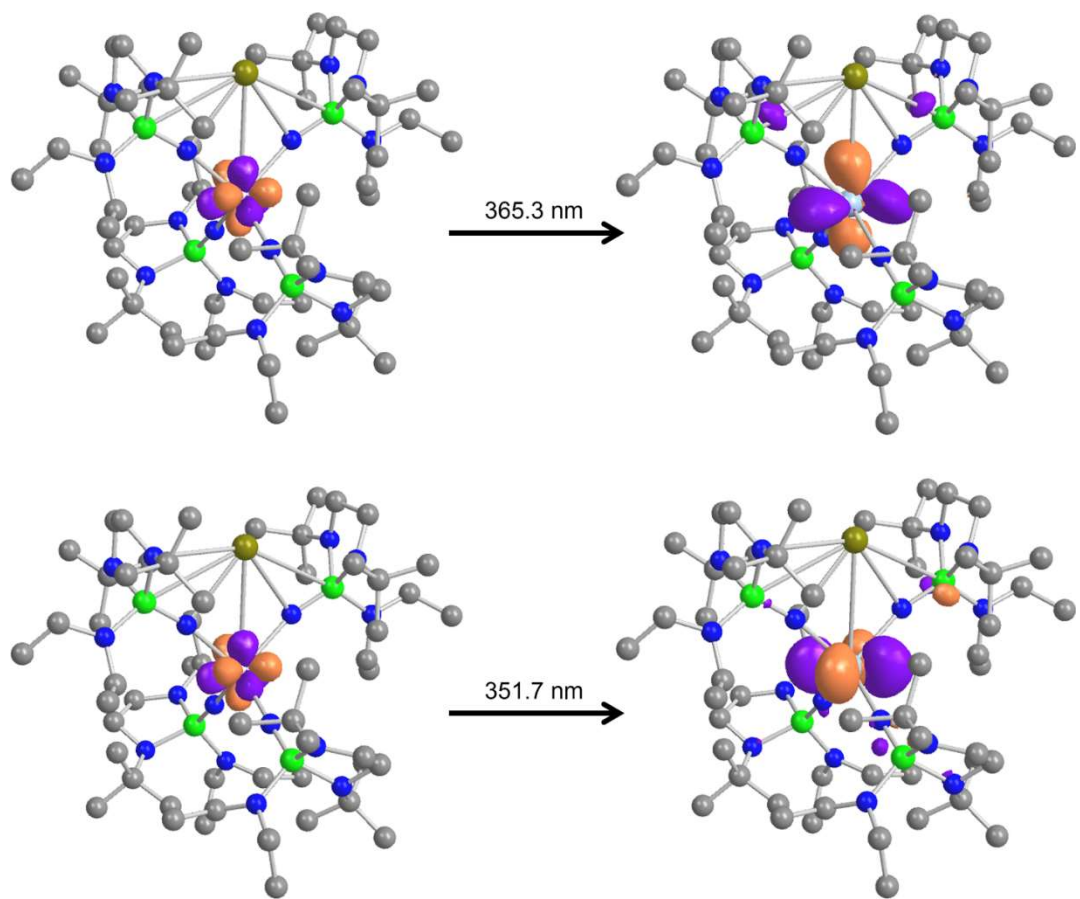

**Figure S104.** Dominant NTO pairs (“hole” (on the left) → “particle” (on the right)) corresponding to the  $4f \rightarrow 5d$  transitions with the highest oscillator strength values within the  $\sim 340$ - $450$  nm range of **2-Ce<sup>Rb</sup>**. The Rb atom is colored dark yellow.

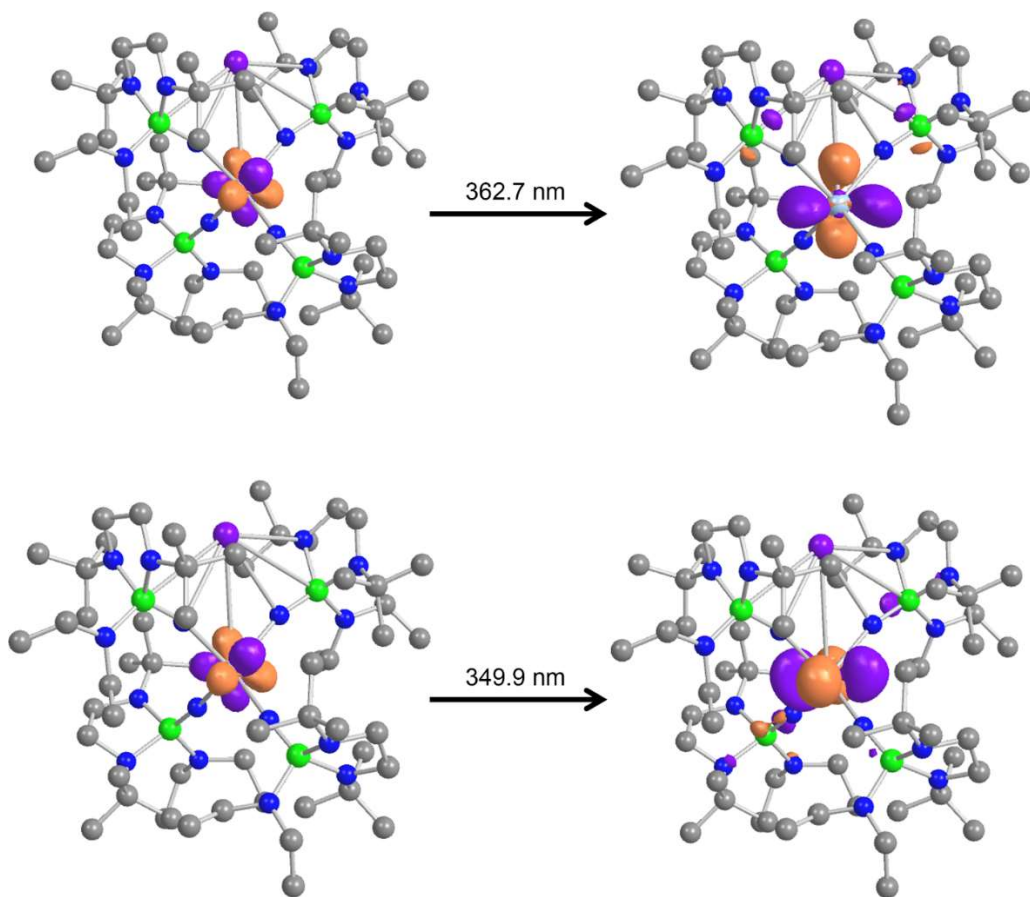

**Figure S105.** Dominant NTO pairs (“hole” (on the left) → “particle” (on the right)) corresponding to the  $4f \rightarrow 5d$  transitions with the highest oscillator strength values within the  $\sim 340$ - $450$  nm range of **2-Ce<sup>Cs</sup>** (1). The Cs atom is colored purple.

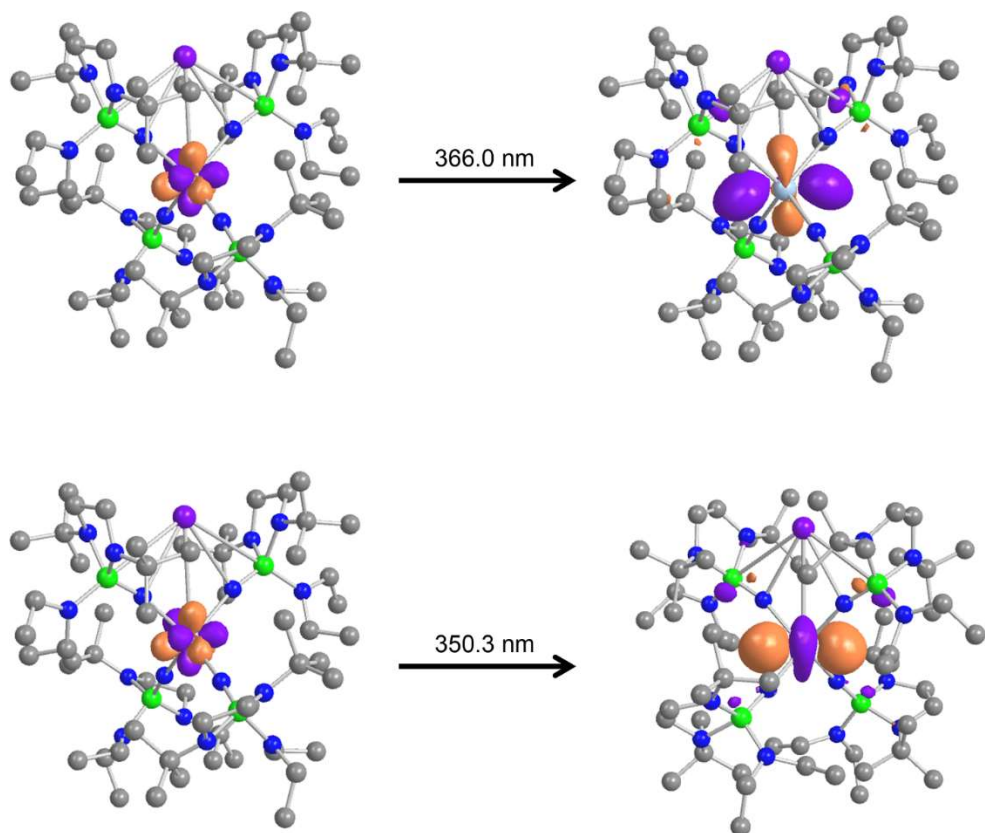

**Figure S106.** Dominant NTO pairs ("hole" (on the left)  $\rightarrow$  "particle" (on the right)) corresponding to the  $4f \rightarrow 5d$  transitions with the highest oscillator strength values within the  $\sim 340\text{-}450 \text{ nm}$  range of  $2\text{-CeCs}(2)$ .

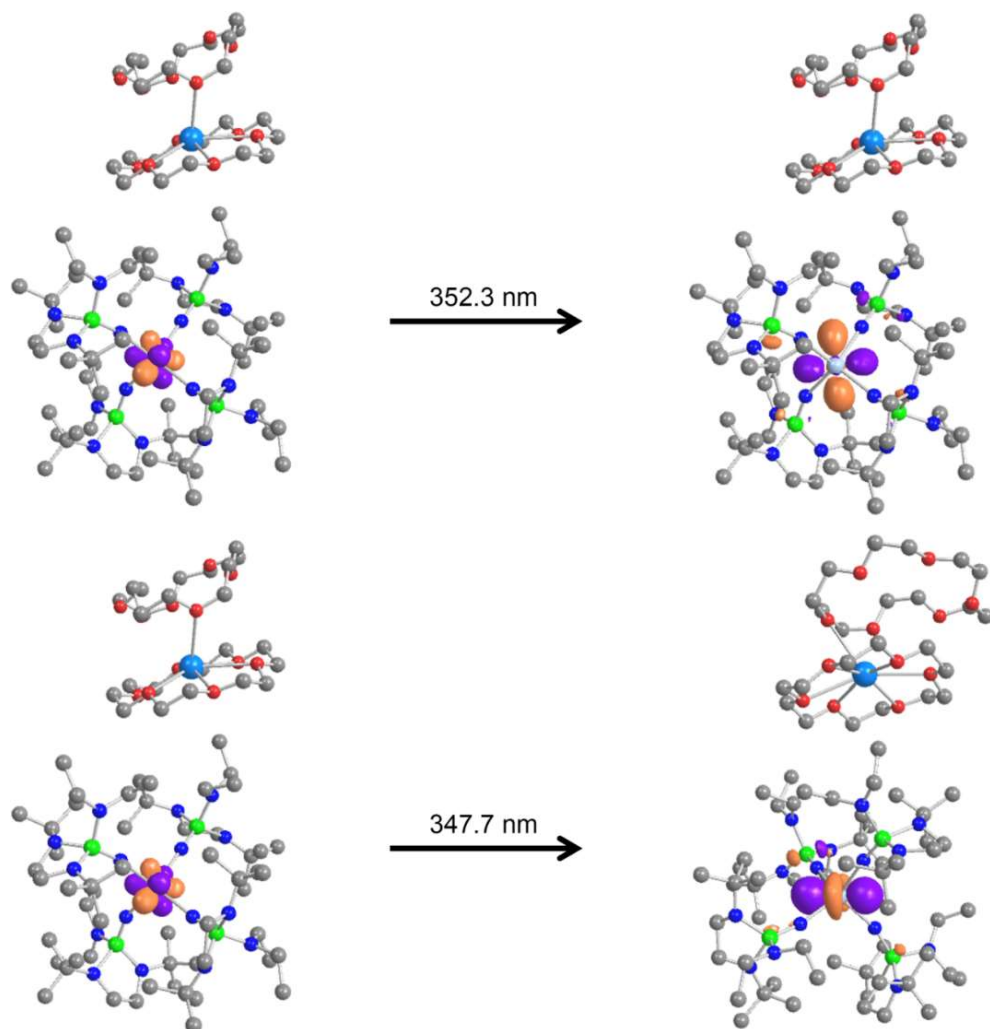

**Figure S107.** Dominant NTO pairs (“hole” (on the left) → “particle” (on the right)) corresponding to the  $4f \rightarrow 5d$  transitions with the highest oscillator strength values within the  $\sim 340$ - $450$  nm range of **2-Ce<sup>K18c6</sup>**. The K atom is colored blue, and the oxygen atoms are colored red.

**Table S8.** Experimental vs. calculated oxidation potentials representing the **2-Ce<sup>M</sup>/1-Ce** (M<sup>+</sup> ejected) and the **2-Ce<sup>M</sup>/1-Ce<sup>M+</sup>** (M = Li, Na, K, Rb, Cs, [K(18c6)<sub>2</sub>]) (M<sup>+</sup> retained) couples. Experimental values are reported based on the data obtained with BPh<sub>4</sub><sup>-</sup> (PF<sub>6</sub><sup>-</sup>) as the supporting electrolyte. VDEs and ADEs for each synthesized complex are reported for both M<sup>+</sup> ejected and M<sup>+</sup> retained when applicable. Calculated potentials are referenced to a Fc<sup>+</sup>/Fc couple.

| Complex                              | Exp. (V)       | VDE (V)                |                         | ADE (V)                |                         |
|--------------------------------------|----------------|------------------------|-------------------------|------------------------|-------------------------|
|                                      |                | M <sup>+</sup> ejected | M <sup>+</sup> retained | M <sup>+</sup> ejected | M <sup>+</sup> retained |
| <b>2-Ce<sup>Li</sup><sup>a</sup></b> | -1.37 (-1.23)  | -0.35                  | -0.69                   | -1.56                  | -1.34                   |
|                                      |                | -0.34                  | -0.69                   | -1.65                  | -1.31                   |
| <b>2-Ce<sup>Na</sup></b>             | -1.45 (-1.44)  | -1.30                  | -0.76                   | -2.40                  | -1.38                   |
| <b>2-Ce<sup>K</sup></b>              | -1.71 (-1.44)  | -1.40                  | -0.77                   | -2.51                  | -1.43                   |
| <b>2-Ce<sup>Rb</sup></b>             | -1.87 (-1.31*) | -1.79                  | -0.79                   | -2.94                  | -1.49                   |
| <b>2-Ce<sup>Cs</sup><sup>a</sup></b> | -1.98 (-)      | -1.83                  | -0.78                   | -2.91                  | -1.46                   |
|                                      |                | -1.80                  | -0.80                   | -2.95                  | -1.47                   |
| <b>2-Ce<sup>K18c6</sup></b>          | -1.92 (-1.63)  |                        | -1.19                   |                        | -1.98                   |
| <b>2-Ce<sup>-</sup></b>              | -1.83 (-1.63)  |                        | -1.29                   |                        | -2.17                   |

<sup>a</sup>More than one crystallographically unique molecule is present in the asymmetric unit, metrics for each molecule are presented.

\*Feature is not well defined

**Table S9.** Cartesian coordinates for the optimized geometries of **2-Ce<sup>-</sup>** and **1-Ce**.

| 2-Ce <sup>-</sup> |              |              |              | 1-Ce |              |              |              |
|-------------------|--------------|--------------|--------------|------|--------------|--------------|--------------|
| 58                | 0.000000000  | 0.000000000  | -0.000053000 | 58   | 0.000000000  | 0.000000000  | 0.000000000  |
| 15                | -2.917794000 | 1.002048000  | 2.323651000  | 15   | -2.379942000 | 1.748064000  | 2.284442000  |
| 7                 | -4.452615000 | 0.963047000  | 1.584471000  | 7    | -3.838556000 | 2.183742000  | 1.557068000  |
| 7                 | -2.997145000 | 2.407093000  | 3.312257000  | 7    | -1.938250000 | 3.066750000  | 3.265546000  |
| 7                 | -1.756888000 | 0.780474000  | 1.343337000  | 7    | -1.361320000 | 1.173688000  | 1.255385000  |
| 7                 | -3.119899000 | 0.000172000  | 3.736551000  | 7    | -2.820965000 | 0.824512000  | 3.666962000  |
| 6                 | -4.601243000 | 0.532857000  | 0.210887000  | 6    | -4.140942000 | 1.855625000  | 0.176674000  |
| 1                 | -5.108892000 | -0.443972000 | 0.159302000  | 1    | -4.903162000 | 1.063289000  | 0.129989000  |
| 1                 | -3.589953000 | 0.373697000  | -0.169819000 | 1    | -3.230085000 | 1.430027000  | -0.248848000 |
| 6                 | -5.339390000 | 1.524795000  | -0.678954000 | 6    | -4.603787000 | 3.041644000  | -0.657990000 |
| 1                 | -5.373926000 | 1.149813000  | -1.706201000 | 1    | -4.786683000 | 2.721454000  | -1.687529000 |
| 1                 | -4.834350000 | 2.493498000  | -0.690604000 | 1    | -3.850284000 | 3.831700000  | -0.680579000 |
| 1                 | -6.374071000 | 1.686747000  | -0.357572000 | 1    | -5.536991000 | 3.475898000  | -0.286438000 |
| 6                 | -2.830168000 | 3.792415000  | 2.863693000  | 6    | -1.505743000 | 4.408414000  | 2.843778000  |
| 6                 | -3.752472000 | 4.705829000  | 3.679475000  | 6    | -2.256680000 | 5.473139000  | 3.650887000  |
| 1                 | -4.793763000 | 4.382835000  | 3.586729000  | 1    | -3.338253000 | 5.359960000  | 3.535676000  |
| 1                 | -3.679844000 | 5.734937000  | 3.313828000  | 1    | -1.981360000 | 6.470989000  | 3.297436000  |
| 1                 | -3.492041000 | 4.716544000  | 4.742023000  | 1    | -2.019737000 | 5.429411000  | 4.717552000  |
| 6                 | -2.931280000 | -1.462612000 | 3.687039000  | 6    | -3.166086000 | -0.610598000 | 3.622611000  |
| 6                 | -3.212365000 | 3.930551000  | 1.392390000  | 6    | -1.799913000 | 4.636345000  | 1.364949000  |
| 1                 | -2.617237000 | 3.262114000  | 0.767156000  | 1    | -1.352285000 | 3.857880000  | 0.744428000  |

|    |              |              |              |    |              |              |              |
|----|--------------|--------------|--------------|----|--------------|--------------|--------------|
| 1  | -3.034117000 | 4.959211000  | 1.063790000  | 1  | -1.382927000 | 5.599646000  | 1.057697000  |
| 1  | -4.268261000 | 3.697827000  | 1.240233000  | 1  | -2.873622000 | 4.655100000  | 1.174481000  |
| 6  | -2.522888000 | 0.687479000  | 4.865714000  | 6  | -2.043726000 | 1.278523000  | 4.806179000  |
| 1  | -1.422029000 | 0.640508000  | 4.853451000  | 1  | -1.015656000 | 0.885428000  | 4.794373000  |
| 1  | -2.866345000 | 0.264687000  | 5.815424000  | 1  | -2.510648000 | 0.973735000  | 5.746648000  |
| 6  | -1.374244000 | 4.235396000  | 3.039624000  | 6  | 0.000000000  | 4.559900000  | 3.074214000  |
| 1  | -1.053237000 | 4.156068000  | 4.083190000  | 1  | 0.267796000  | 4.401108000  | 4.122888000  |
| 1  | -1.237142000 | 5.276953000  | 2.728615000  | 1  | 0.338228000  | 5.563616000  | 2.796653000  |
| 1  | -0.725528000 | 3.598664000  | 2.436095000  | 1  | 0.540857000  | 3.829008000  | 2.471888000  |
| 6  | -2.970068000 | 2.130798000  | 4.729241000  | 6  | -2.021383000 | 2.788406000  | 4.683809000  |
| 1  | -3.965153000 | 2.265084000  | 5.188198000  | 1  | -2.934134000 | 3.217477000  | 5.127352000  |
| 1  | -2.273577000 | 2.790831000  | 5.260748000  | 1  | -1.164068000 | 3.203424000  | 5.225032000  |
| 6  | -3.764429000 | -2.093703000 | 4.809223000  | 6  | -4.186802000 | -0.896367000 | 4.729599000  |
| 1  | -3.426546000 | -1.781765000 | 5.801973000  | 1  | -3.778272000 | -0.718349000 | 5.728171000  |
| 1  | -3.687972000 | -3.185159000 | 4.769559000  | 1  | -4.500810000 | -1.943868000 | 4.692810000  |
| 1  | -4.817186000 | -1.816161000 | 4.706013000  | 1  | -5.072125000 | -0.266965000 | 4.608184000  |
| 6  | -5.648029000 | 1.312641000  | 2.319372000  | 6  | -4.864658000 | 2.860732000  | 2.330882000  |
| 1  | -6.124424000 | 2.197859000  | 1.866120000  | 1  | -5.020934000 | 3.875132000  | 1.932982000  |
| 1  | -5.342675000 | 1.619236000  | 3.321042000  | 1  | -4.485147000 | 2.990731000  | 3.345689000  |
| 6  | -3.439165000 | -2.019989000 | 2.358348000  | 6  | -3.810072000 | -0.967192000 | 2.285314000  |
| 1  | -2.853162000 | -1.642486000 | 1.518100000  | 1  | -3.117133000 | -0.823405000 | 1.453871000  |
| 1  | -4.485692000 | -1.758784000 | 2.190833000  | 1  | -4.701477000 | -0.367380000 | 2.096255000  |
| 1  | -3.354878000 | -3.110502000 | 2.367626000  | 1  | -4.106078000 | -2.019256000 | 2.299335000  |
| 6  | -6.682233000 | 0.199484000  | 2.433769000  | 6  | -6.202907000 | 2.138495000  | 2.393708000  |
| 1  | -7.026484000 | -0.146935000 | 1.454450000  | 1  | -6.640602000 | 1.986728000  | 1.403030000  |
| 1  | -7.561182000 | 0.553650000  | 2.983553000  | 1  | -6.917012000 | 2.726607000  | 2.978239000  |
| 1  | -6.270690000 | -0.658574000 | 2.970412000  | 1  | -6.102388000 | 1.161712000  | 2.872134000  |
| 6  | -1.463020000 | -1.864700000 | 3.859231000  | 6  | -1.933982000 | -1.495168000 | 3.826920000  |
| 1  | -0.830673000 | -1.376751000 | 3.113233000  | 1  | -1.161332000 | -1.278607000 | 3.084060000  |
| 1  | -1.351518000 | -2.947314000 | 3.748904000  | 1  | -2.209759000 | -2.549453000 | 3.739015000  |
| 1  | -1.083399000 | -1.600823000 | 4.851805000  | 1  | -1.498095000 | -1.359642000 | 4.821625000  |
| 15 | 1.001859000  | 2.918009000  | -2.323612000 | 15 | 1.748064000  | 2.379942000  | -2.284442000 |
| 7  | 0.962628000  | 4.452802000  | -1.584382000 | 7  | 2.183742000  | 3.838556000  | -1.557068000 |
| 7  | 2.406925000  | 2.997632000  | -3.312179000 | 7  | 3.066750000  | 1.938250000  | -3.265546000 |
| 7  | 0.780368000  | 1.757054000  | -1.343326000 | 7  | 1.173688000  | 1.361320000  | -1.255385000 |
| 7  | 0.000000000  | 3.120077000  | -3.736531000 | 7  | 0.824512000  | 2.820965000  | -3.666962000 |
| 6  | 0.532354000  | 4.601346000  | -0.210815000 | 6  | 1.855625000  | 4.140942000  | -0.176674000 |
| 1  | -0.444434000 | 5.109078000  | -0.159287000 | 1  | 1.063289000  | 4.903162000  | -0.129989000 |
| 1  | 0.373078000  | 3.590045000  | 0.169814000  | 1  | 1.430027000  | 3.230085000  | 0.248848000  |
| 6  | 1.524260000  | 5.339369000  | 0.679162000  | 6  | 3.041644000  | 4.603787000  | 0.657990000  |
| 1  | 1.149131000  | 5.373967000  | 1.706353000  | 1  | 2.721454000  | 4.786683000  | 1.687529000  |
| 1  | 2.492894000  | 4.834200000  | 0.690955000  | 1  | 3.831700000  | 3.850284000  | 0.680579000  |
| 1  | 1.686397000  | 6.374025000  | 0.357790000  | 1  | 3.475898000  | 5.536991000  | 0.286438000  |



|    |              |              |              |    |              |              |              |
|----|--------------|--------------|--------------|----|--------------|--------------|--------------|
| 6  | 3.792294000  | 2.830933000  | -2.863648000 | 6  | 4.408414000  | 1.505743000  | -2.843778000 |
| 6  | 4.705455000  | 3.753168000  | -3.679770000 | 6  | 5.473139000  | 2.256680000  | -3.650887000 |
| 1  | 4.382350000  | 4.794439000  | -3.587187000 | 1  | 5.359960000  | 3.338253000  | -3.535676000 |
| 1  | 5.734636000  | 3.680735000  | -3.314288000 | 1  | 6.470989000  | 1.981360000  | -3.297436000 |
| 1  | 4.716004000  | 3.492511000  | -4.742267000 | 1  | 5.429411000  | 2.019737000  | -4.717552000 |
| 6  | -1.462768000 | 2.931294000  | -3.687137000 | 6  | -0.610598000 | 3.166086000  | -3.622611000 |
| 6  | 3.930537000  | 3.213531000  | -1.392459000 | 6  | 4.636345000  | 1.799913000  | -1.364949000 |
| 1  | 3.262289000  | 2.618428000  | -0.767004000 | 1  | 3.857880000  | 1.352285000  | -0.744428000 |
| 1  | 4.959273000  | 3.035580000  | -1.063931000 | 1  | 5.599646000  | 1.382927000  | -1.057697000 |
| 1  | 3.697611000  | 4.269417000  | -1.240550000 | 1  | 4.655100000  | 2.873622000  | -1.174481000 |
| 6  | 0.687407000  | 2.523211000  | -4.865705000 | 6  | 1.278523000  | 2.043726000  | -4.806179000 |
| 1  | 0.640561000  | 1.422346000  | -4.853508000 | 1  | 0.885428000  | 1.015656000  | -4.794373000 |
| 1  | 0.264592000  | 2.866678000  | -5.815401000 | 1  | 0.973735000  | 2.510648000  | -5.746648000 |
| 6  | 4.235507000  | 1.375049000  | -3.039284000 | 6  | 4.559900000  | 0.000000000  | -3.074214000 |
| 1  | 4.156122000  | 1.053772000  | -4.082764000 | 1  | 4.401108000  | -0.267796000 | -4.122888000 |
| 1  | 5.277122000  | 1.238212000  | -2.728362000 | 1  | 5.563616000  | -0.338228000 | -2.796653000 |
| 1  | 3.598957000  | 0.726376000  | -2.435516000 | 1  | 3.829008000  | -0.540857000 | -2.471888000 |
| 6  | 2.130667000  | 2.970573000  | -4.729168000 | 6  | 2.788406000  | 2.021383000  | -4.683809000 |
| 1  | 2.264829000  | 3.965700000  | -5.188066000 | 1  | 3.217477000  | 2.934134000  | -5.127352000 |
| 1  | 2.790819000  | 2.274204000  | -5.260687000 | 1  | 3.203424000  | 1.164068000  | -5.225032000 |
| 6  | -2.093807000 | 3.764420000  | -4.809355000 | 6  | -0.896367000 | 4.186802000  | -4.729599000 |
| 1  | -1.781552000 | 3.426733000  | -5.802074000 | 1  | -0.718349000 | 3.778272000  | -5.728171000 |
| 1  | -3.185253000 | 3.687681000  | -4.769947000 | 1  | -1.943868000 | 4.500810000  | -4.692810000 |
| 1  | -1.816550000 | 4.817233000  | -4.705951000 | 1  | -0.266965000 | 5.072125000  | -4.608184000 |
| 6  | 1.312281000  | 5.648258000  | -2.319187000 | 6  | 2.860732000  | 4.864658000  | -2.330882000 |
| 1  | 2.197436000  | 6.124641000  | -1.865798000 | 1  | 3.875132000  | 5.020934000  | -1.932982000 |
| 1  | 1.619018000  | 5.342949000  | -3.320829000 | 1  | 2.990731000  | 4.485147000  | -3.345689000 |
| 6  | -2.020414000 | 3.439023000  | -2.358489000 | 6  | -0.967192000 | 3.810072000  | -2.285314000 |
| 1  | -1.642977000 | 2.853007000  | -1.518221000 | 1  | -0.823405000 | 3.117133000  | -1.453871000 |
| 1  | -1.759363000 | 4.485568000  | -2.190862000 | 1  | -0.367380000 | 4.701477000  | -2.096255000 |
| 1  | -3.110916000 | 3.354602000  | -2.367940000 | 1  | -2.019256000 | 4.106078000  | -2.299335000 |
| 6  | 0.199140000  | 6.682471000  | -2.433676000 | 6  | 2.138495000  | 6.202907000  | -2.393708000 |
| 1  | -0.147390000 | 7.026685000  | -1.454384000 | 1  | 1.986728000  | 6.640602000  | -1.403030000 |
| 1  | 0.553381000  | 7.561441000  | -2.983378000 | 1  | 2.726607000  | 6.917012000  | -2.978239000 |
| 1  | -0.658857000 | 6.270964000  | -2.970443000 | 1  | 1.161712000  | 6.102388000  | -2.872134000 |
| 6  | -1.864652000 | 1.463005000  | -3.859515000 | 6  | -1.495168000 | 1.933982000  | -3.826920000 |
| 1  | -1.376892000 | 0.830686000  | -3.113371000 | 1  | -1.278607000 | 1.161332000  | -3.084060000 |
| 1  | -2.947291000 | 1.351391000  | -3.749561000 | 1  | -2.549453000 | 2.209759000  | -3.739015000 |
| 1  | -1.600398000 | 1.083445000  | -4.852013000 | 1  | -1.359642000 | 1.498095000  | -4.821625000 |
| 15 | 2.917794000  | -1.002048000 | 2.323651000  | 15 | 2.379942000  | -1.748064000 | 2.284442000  |
| 7  | 4.452615000  | -0.963047000 | 1.584471000  | 7  | 3.838556000  | -2.183742000 | 1.557068000  |
| 7  | 2.997145000  | -2.407093000 | 3.312257000  | 7  | 1.938250000  | -3.066750000 | 3.265546000  |
| 7  | 1.756888000  | -0.780474000 | 1.343337000  | 7  | 1.361320000  | -1.173688000 | 1.255385000  |

|   |             |              |              |   |              |              |              |
|---|-------------|--------------|--------------|---|--------------|--------------|--------------|
| 7 | 3.119899000 | -0.000172000 | 3.736551000  | 7 | 2.820965000  | -0.824512000 | 3.666962000  |
| 6 | 4.601243000 | -0.532857000 | 0.210887000  | 6 | 4.140942000  | -1.855625000 | 0.176674000  |
| 1 | 5.108892000 | 0.443972000  | 0.159302000  | 1 | 4.903162000  | -1.063289000 | 0.129989000  |
| 1 | 3.589953000 | -0.373697000 | -0.169819000 | 1 | 3.230085000  | -1.430027000 | -0.248848000 |
| 6 | 5.339390000 | -1.524795000 | -0.678954000 | 6 | 4.603787000  | -3.041644000 | -0.657990000 |
| 1 | 5.373926000 | -1.149813000 | -1.706201000 | 1 | 4.786683000  | -2.721454000 | -1.687529000 |
| 1 | 4.834350000 | -2.493498000 | -0.690604000 | 1 | 3.850284000  | -3.831700000 | -0.680579000 |
| 1 | 6.374071000 | -1.686747000 | -0.357572000 | 1 | 5.536991000  | -3.475898000 | -0.286438000 |
| 6 | 2.830168000 | -3.792415000 | 2.863693000  | 6 | 1.505743000  | -4.408414000 | 2.843778000  |
| 6 | 3.752472000 | -4.705829000 | 3.679475000  | 6 | 2.256680000  | -5.473139000 | 3.650887000  |
| 1 | 4.793763000 | -4.382835000 | 3.586729000  | 1 | 3.338253000  | -5.359960000 | 3.535676000  |
| 1 | 3.679844000 | -5.734937000 | 3.313828000  | 1 | 1.981360000  | -6.470989000 | 3.297436000  |
| 1 | 3.492041000 | -4.716544000 | 4.742023000  | 1 | 2.019737000  | -5.429411000 | 4.717552000  |
| 6 | 2.931280000 | 1.462612000  | 3.687039000  | 6 | 3.166086000  | 0.610598000  | 3.622611000  |
| 6 | 3.212365000 | -3.930551000 | 1.392390000  | 6 | 1.799913000  | -4.636345000 | 1.364949000  |
| 1 | 2.617237000 | -3.262114000 | 0.767156000  | 1 | 1.352285000  | -3.857880000 | 0.744428000  |
| 1 | 3.034117000 | -4.959211000 | 1.063790000  | 1 | 1.382927000  | -5.599646000 | 1.057697000  |
| 1 | 4.268261000 | -3.697827000 | 1.240233000  | 1 | 2.873622000  | -4.655100000 | 1.174481000  |
| 6 | 2.522888000 | -0.687479000 | 4.865714000  | 6 | 2.043726000  | -1.278523000 | 4.806179000  |
| 1 | 1.422029000 | -0.640508000 | 4.853451000  | 1 | 1.015656000  | -0.885428000 | 4.794373000  |
| 1 | 2.866345000 | -0.264687000 | 5.815424000  | 1 | 2.510648000  | -0.973735000 | 5.746648000  |
| 6 | 1.374244000 | -4.235396000 | 3.039624000  | 6 | 0.000000000  | -4.559900000 | 3.074214000  |
| 1 | 1.053237000 | -4.156068000 | 4.083190000  | 1 | -0.267796000 | -4.401108000 | 4.122888000  |
| 1 | 1.237142000 | -5.276953000 | 2.728615000  | 1 | -0.338228000 | -5.563616000 | 2.796653000  |
| 1 | 0.725528000 | -3.598664000 | 2.436095000  | 1 | -0.540857000 | -3.829008000 | 2.471888000  |
| 6 | 2.970068000 | -2.130798000 | 4.729241000  | 6 | 2.021383000  | -2.788406000 | 4.683809000  |
| 1 | 3.965153000 | -2.265084000 | 5.188198000  | 1 | 2.934134000  | -3.217477000 | 5.127352000  |
| 1 | 2.273577000 | -2.790831000 | 5.260748000  | 1 | 1.164068000  | -3.203424000 | 5.225032000  |
| 6 | 3.764429000 | 2.093703000  | 4.809223000  | 6 | 4.186802000  | 0.896367000  | 4.729599000  |
| 1 | 3.426546000 | 1.781765000  | 5.801973000  | 1 | 3.778272000  | 0.718349000  | 5.728171000  |
| 1 | 3.687972000 | 3.185159000  | 4.769559000  | 1 | 4.500810000  | 1.943868000  | 4.692810000  |
| 1 | 4.817186000 | 1.816161000  | 4.706013000  | 1 | 5.072125000  | 0.266965000  | 4.608184000  |
| 6 | 5.648029000 | -1.312641000 | 2.319372000  | 6 | 4.864658000  | -2.860732000 | 2.330882000  |
| 1 | 6.124424000 | -2.197859000 | 1.866120000  | 1 | 5.020934000  | -3.875132000 | 1.932982000  |
| 1 | 5.342675000 | -1.619236000 | 3.321042000  | 1 | 4.485147000  | -2.990731000 | 3.345689000  |
| 6 | 3.439165000 | 2.019989000  | 2.358348000  | 6 | 3.810072000  | 0.967192000  | 2.285314000  |
| 1 | 2.853162000 | 1.642486000  | 1.518100000  | 1 | 3.117133000  | 0.823405000  | 1.453871000  |
| 1 | 4.485692000 | 1.758784000  | 2.190833000  | 1 | 4.701477000  | 0.367380000  | 2.096255000  |
| 1 | 3.354878000 | 3.110502000  | 2.367626000  | 1 | 4.106078000  | 2.019256000  | 2.299335000  |
| 6 | 6.682233000 | -0.199484000 | 2.433769000  | 6 | 6.202907000  | -2.138495000 | 2.393708000  |
| 1 | 7.026484000 | 0.146935000  | 1.454450000  | 1 | 6.640602000  | -1.986728000 | 1.403030000  |
| 1 | 7.561182000 | -0.553650000 | 2.983553000  | 1 | 6.917012000  | -2.726607000 | 2.978239000  |
| 1 | 6.270690000 | 0.658574000  | 2.970412000  | 1 | 6.102388000  | -1.161712000 | 2.872134000  |

|    |              |              |              |    |              |              |              |
|----|--------------|--------------|--------------|----|--------------|--------------|--------------|
| 6  | 1.463020000  | 1.864700000  | 3.859231000  | 6  | 1.933982000  | 1.495168000  | 3.826920000  |
| 1  | 0.830673000  | 1.376751000  | 3.113233000  | 1  | 1.161332000  | 1.278607000  | 3.084060000  |
| 1  | 1.351518000  | 2.947314000  | 3.748904000  | 1  | 2.209759000  | 2.549453000  | 3.739015000  |
| 1  | 1.083399000  | 1.600823000  | 4.851805000  | 1  | 1.498095000  | 1.359642000  | 4.821625000  |
| 15 | -1.001859000 | -2.918009000 | -2.323612000 | 15 | -1.748064000 | -2.379942000 | -2.284442000 |
| 7  | -0.962628000 | -4.452802000 | -1.584382000 | 7  | -2.183742000 | -3.838556000 | -1.557068000 |
| 7  | -2.406925000 | -2.997632000 | -3.312179000 | 7  | -3.066750000 | -1.938250000 | -3.265546000 |
| 7  | -0.780368000 | -1.757054000 | -1.343326000 | 7  | -1.173688000 | -1.361320000 | -1.255385000 |
| 7  | 0.000000000  | -3.120077000 | -3.736531000 | 7  | -0.824512000 | -2.820965000 | -3.666962000 |
| 6  | -0.532354000 | -4.601346000 | -0.210815000 | 6  | -1.855625000 | -4.140942000 | -0.176674000 |
| 1  | 0.444434000  | -5.109078000 | -0.159287000 | 1  | -1.063289000 | -4.903162000 | -0.129989000 |
| 1  | -0.373078000 | -3.590045000 | 0.169814000  | 1  | -1.430027000 | -3.230085000 | 0.248848000  |
| 6  | -1.524260000 | -5.339369000 | 0.679162000  | 6  | -3.041644000 | -4.603787000 | 0.657990000  |
| 1  | -1.149131000 | -5.373967000 | 1.706353000  | 1  | -2.721454000 | -4.786683000 | 1.687529000  |
| 1  | -2.492894000 | -4.834200000 | 0.690955000  | 1  | -3.831700000 | -3.850284000 | 0.680579000  |
| 1  | -1.686397000 | -6.374025000 | 0.357790000  | 1  | -3.475898000 | -5.536991000 | 0.286438000  |
| 6  | -3.792294000 | -2.830933000 | -2.863648000 | 6  | -4.408414000 | -1.505743000 | -2.843778000 |
| 6  | -4.705455000 | -3.753168000 | -3.679770000 | 6  | -5.473139000 | -2.256680000 | -3.650887000 |
| 1  | -4.382350000 | -4.794439000 | -3.587187000 | 1  | -5.359960000 | -3.338253000 | -3.535676000 |
| 1  | -5.734636000 | -3.680735000 | -3.314288000 | 1  | -6.470989000 | -1.981360000 | -3.297436000 |
| 1  | -4.716004000 | -3.492511000 | -4.742267000 | 1  | -5.429411000 | -2.019737000 | -4.717552000 |
| 6  | 1.462768000  | -2.931294000 | -3.687137000 | 6  | 0.610598000  | -3.166086000 | -3.622611000 |
| 6  | -3.930537000 | -3.213531000 | -1.392459000 | 6  | -4.636345000 | -1.799913000 | -1.364949000 |
| 1  | -3.262289000 | -2.618428000 | -0.767004000 | 1  | -3.857880000 | -1.352285000 | -0.744428000 |
| 1  | -4.959273000 | -3.035580000 | -1.063931000 | 1  | -5.599646000 | -1.382927000 | -1.057697000 |
| 1  | -3.697611000 | -4.269417000 | -1.240550000 | 1  | -4.655100000 | -2.873622000 | -1.174481000 |
| 6  | -0.687407000 | -2.523211000 | -4.865705000 | 6  | -1.278523000 | -2.043726000 | -4.806179000 |
| 1  | -0.640561000 | -1.422346000 | -4.853508000 | 1  | -0.885428000 | -1.015656000 | -4.794373000 |
| 1  | -0.264592000 | -2.866678000 | -5.815401000 | 1  | -0.973735000 | -2.510648000 | -5.746648000 |
| 6  | -4.235507000 | -1.375049000 | -3.039284000 | 6  | -4.559900000 | 0.000000000  | -3.074214000 |
| 1  | -4.156122000 | -1.053772000 | -4.082764000 | 1  | -4.401108000 | 0.267796000  | -4.122888000 |
| 1  | -5.277122000 | -1.238212000 | -2.728362000 | 1  | -5.563616000 | 0.338228000  | -2.796653000 |
| 1  | -3.598957000 | -0.726376000 | -2.435516000 | 1  | -3.829008000 | 0.540857000  | -2.471888000 |
| 6  | -2.130667000 | -2.970573000 | -4.729168000 | 6  | -2.788406000 | -2.021383000 | -4.683809000 |
| 1  | -2.264829000 | -3.965700000 | -5.188066000 | 1  | -3.217477000 | -2.934134000 | -5.127352000 |
| 1  | -2.790819000 | -2.274204000 | -5.260687000 | 1  | -3.203424000 | -1.164068000 | -5.225032000 |
| 6  | 2.093807000  | -3.764420000 | -4.809355000 | 6  | 0.896367000  | -4.186802000 | -4.729599000 |
| 1  | 1.781552000  | -3.426733000 | -5.802074000 | 1  | 0.718349000  | -3.778272000 | -5.728171000 |
| 1  | 3.185253000  | -3.687681000 | -4.769947000 | 1  | 1.943868000  | -4.500810000 | -4.692810000 |
| 1  | 1.816550000  | -4.817233000 | -4.705951000 | 1  | 0.266965000  | -5.072125000 | -4.608184000 |
| 6  | -1.312281000 | -5.648258000 | -2.319187000 | 6  | -2.860732000 | -4.864658000 | -2.330882000 |
| 1  | -2.197436000 | -6.124641000 | -1.865798000 | 1  | -3.875132000 | -5.020934000 | -1.932982000 |
| 1  | -1.619018000 | -5.342949000 | -3.320829000 | 1  | -2.990731000 | -4.485147000 | -3.345689000 |

|   |              |              |              |   |              |              |              |
|---|--------------|--------------|--------------|---|--------------|--------------|--------------|
| 6 | 2.020414000  | -3.439023000 | -2.358489000 | 6 | 0.967192000  | -3.810072000 | -2.285314000 |
| 1 | 1.642977000  | -2.853007000 | -1.518221000 | 1 | 0.823405000  | -3.117133000 | -1.453871000 |
| 1 | 1.759363000  | -4.485568000 | -2.190862000 | 1 | 0.367380000  | -4.701477000 | -2.096255000 |
| 1 | 3.110916000  | -3.354602000 | -2.367940000 | 1 | 2.019256000  | -4.106078000 | -2.299335000 |
| 6 | -0.199140000 | -6.682471000 | -2.433676000 | 6 | -2.138495000 | -6.202907000 | -2.393708000 |
| 1 | 0.147390000  | -7.026685000 | -1.454384000 | 1 | -1.986728000 | -6.640602000 | -1.403030000 |
| 1 | -0.553381000 | -7.561441000 | -2.983378000 | 1 | -2.726607000 | -6.917012000 | -2.978239000 |
| 1 | 0.658857000  | -6.270964000 | -2.970443000 | 1 | -1.161712000 | -6.102388000 | -2.872134000 |
| 6 | 1.864652000  | -1.463005000 | -3.859515000 | 6 | 1.495168000  | -1.933982000 | -3.826920000 |
| 1 | 1.376892000  | -0.830686000 | -3.113371000 | 1 | 1.278607000  | -1.161332000 | -3.084060000 |
| 1 | 2.947291000  | -1.351391000 | -3.749561000 | 1 | 2.549453000  | -2.209759000 | -3.739015000 |
| 1 | 1.600398000  | -1.083445000 | -4.852013000 | 1 | 1.359642000  | -1.498095000 | -4.821625000 |

**Table S10.** Cartesian coordinates for the optimized geometries of **2-Ce<sup>II</sup> (1)** and **2-Ce<sup>II</sup> (2)**.

| 2-Ce <sup>II</sup> (1) |             |              |              | 2-Ce <sup>II</sup> (2) |              |             |              |
|------------------------|-------------|--------------|--------------|------------------------|--------------|-------------|--------------|
| 58                     | 0.320527000 | -0.008360000 | 0.043575000  | 58                     | -0.308091000 | 0.030608000 | -0.009127000 |
| 15                     | 2.248049000 | 3.276419000  | -0.353303000 | 15                     | -2.087460000 | 3.400175000 | 0.076355000  |
| 7                      | 1.426509000 | 1.966847000  | -0.315025000 | 7                      | -1.401290000 | 2.033558000 | -0.155137000 |
| 7                      | 3.553190000 | 3.220156000  | -1.444357000 | 7                      | -3.399406000 | 3.672732000 | -0.960495000 |
| 6                      | 3.919831000 | 1.968055000  | -2.075988000 | 7                      | -2.669369000 | 3.835265000 | 1.651589000  |
| 1                      | 3.098575000 | 1.271108000  | -1.899314000 | 7                      | -1.188233000 | 4.850749000 | -0.011622000 |
| 1                      | 4.806187000 | 1.541291000  | -1.577954000 | 6                      | -3.420387000 | 2.893455000 | 2.504831000  |
| 6                      | 4.200861000 | 2.080800000  | -3.567600000 | 6                      | -0.303389000 | 5.258757000 | -1.110416000 |
| 1                      | 5.064746000 | 2.718578000  | -3.777397000 | 6                      | -1.652825000 | 4.640485000 | 2.303436000  |
| 1                      | 3.340682000 | 2.490834000  | -4.103083000 | 1                      | -0.817945000 | 4.031115000 | 2.684204000  |
| 1                      | 4.421096000 | 1.092591000  | -3.984671000 | 1                      | -2.071098000 | 5.200542000 | 3.144544000  |
| 6                      | 4.585187000 | 4.245295000  | -1.410032000 | 6                      | -1.144343000 | 5.588477000 | 1.231583000  |
| 1                      | 5.560014000 | 3.745495000  | -1.506561000 | 1                      | -1.777237000 | 6.489428000 | 1.187079000  |
| 1                      | 4.584044000 | 4.710198000  | -0.418809000 | 1                      | -0.125946000 | 5.915615000 | 1.473738000  |
| 6                      | 4.462798000 | 5.338493000  | -2.463325000 | 6                      | -3.965411000 | 2.596974000 | -1.748573000 |
| 1                      | 5.297672000 | 6.043103000  | -2.378396000 | 1                      | -4.936770000 | 2.281415000 | -1.336023000 |
| 1                      | 3.534361000 | 5.893553000  | -2.319043000 | 1                      | -3.290672000 | 1.746048000 | -1.636185000 |
| 1                      | 4.467262000 | 4.934534000  | -3.478686000 | 6                      | -4.138344000 | 2.928664000 | -3.224345000 |
| 7                      | 2.887500000 | 3.922961000  | 1.095942000  | 1                      | -3.190860000 | 3.232286000 | -3.676595000 |
| 7                      | 1.500383000 | 4.794814000  | -0.725833000 | 1                      | -4.863570000 | 3.730696000 | -3.393071000 |
| 6                      | 3.690052000 | 3.198604000  | 2.088666000  | 1                      | -4.502411000 | 2.048588000 | -3.763498000 |
| 6                      | 0.502233000 | 4.925551000  | -1.808380000 | 6                      | -4.057197000 | 4.964767000 | -1.009838000 |
| 6                      | 2.403569000 | 5.247785000  | 1.411252000  | 1                      | -4.015239000 | 5.356598000 | -2.037645000 |
| 1                      | 3.169116000 | 6.015690000  | 1.215483000  | 1                      | -3.470599000 | 5.657764000 | -0.404529000 |
| 1                      | 2.113977000 | 5.333587000  | 2.465536000  | 6                      | -5.502883000 | 4.979736000 | -0.532549000 |
| 6                      | 1.193491000 | 5.472125000  | 0.522393000  | 1                      | -5.929888000 | 5.979756000 | -0.659365000 |
| 1                      | 0.294514000 | 5.063551000  | 1.011254000  | 1                      | -5.568348000 | 4.718879000 | 0.525850000  |

|    |              |              |              |    |              |              |              |
|----|--------------|--------------|--------------|----|--------------|--------------|--------------|
| 1  | 1.031052000  | 6.540846000  | 0.359432000  | 1  | -6.132238000 | 4.283531000  | -1.095041000 |
| 6  | 4.435244000  | 2.039845000  | 1.428805000  | 6  | -4.360562000 | 2.044975000  | 1.651086000  |
| 1  | 3.747039000  | 1.345948000  | 0.941404000  | 1  | -5.058259000 | 2.666599000  | 1.088574000  |
| 1  | 4.994705000  | 1.485200000  | 2.187421000  | 1  | -4.940978000 | 1.382416000  | 2.299213000  |
| 1  | 5.146499000  | 2.401652000  | 0.682365000  | 1  | -3.806642000 | 1.423686000  | 0.944536000  |
| 6  | 2.783225000  | 2.650602000  | 3.194547000  | 6  | -4.274962000 | 3.699257000  | 3.488698000  |
| 1  | 2.238803000  | 3.454344000  | 3.699998000  | 1  | -3.668498000 | 4.275075000  | 4.193243000  |
| 1  | 3.357737000  | 2.110590000  | 3.954592000  | 1  | -4.903769000 | 3.027059000  | 4.080413000  |
| 1  | 2.048862000  | 1.968691000  | 2.762367000  | 1  | -4.924985000 | 4.394722000  | 2.951292000  |
| 6  | 4.731845000  | 4.142486000  | 2.698197000  | 6  | -2.491591000 | 1.959680000  | 3.289539000  |
| 1  | 5.375396000  | 4.568432000  | 1.922972000  | 1  | -1.835417000 | 1.417259000  | 2.604792000  |
| 1  | 5.366779000  | 3.592923000  | 3.399188000  | 1  | -3.072985000 | 1.231029000  | 3.862529000  |
| 1  | 4.273341000  | 4.966738000  | 3.251360000  | 1  | -1.865358000 | 2.507121000  | 3.999221000  |
| 6  | -0.878932000 | 4.426262000  | -1.373161000 | 6  | -0.775119000 | 4.655518000  | -2.431023000 |
| 1  | -0.808501000 | 3.391783000  | -1.029501000 | 1  | -0.824209000 | 3.566988000  | -2.370146000 |
| 1  | -1.584173000 | 4.475759000  | -2.208820000 | 1  | -0.071433000 | 4.925110000  | -3.224491000 |
| 1  | -1.292380000 | 5.033954000  | -0.563608000 | 1  | -1.762376000 | 5.030910000  | -2.706257000 |
| 6  | 0.950164000  | 4.129590000  | -3.032567000 | 6  | -0.336989000 | 6.783766000  | -1.252970000 |
| 1  | 1.922601000  | 4.468382000  | -3.390805000 | 1  | -1.359903000 | 7.135984000  | -1.414531000 |
| 1  | 0.218219000  | 4.261390000  | -3.835427000 | 1  | 0.266878000  | 7.090825000  | -2.111916000 |
| 1  | 1.019603000  | 3.064073000  | -2.805151000 | 1  | 0.064892000  | 7.294085000  | -0.373426000 |
| 6  | 0.401960000  | 6.398621000  | -2.216976000 | 6  | 1.130550000  | 4.794183000  | -0.836093000 |
| 1  | -0.008315000 | 7.026311000  | -1.421351000 | 1  | 1.509582000  | 5.202254000  | 0.105631000  |
| 1  | -0.262607000 | 6.500890000  | -3.080188000 | 1  | 1.810668000  | 5.114558000  | -1.632805000 |
| 1  | 1.382953000  | 6.793783000  | -2.493496000 | 1  | 1.158260000  | 3.704585000  | -0.769894000 |
| 15 | -2.639873000 | 0.367623000  | 2.597261000  | 3  | 2.665095000  | -0.335562000 | 0.186023000  |
| 7  | -1.670783000 | 0.135866000  | 1.416677000  | 7  | 1.632920000  | -0.208334000 | -1.450724000 |
| 7  | -1.978319000 | -0.107308000 | 4.087932000  | 15 | 2.487124000  | -0.299468000 | -2.740256000 |
| 6  | -2.663284000 | 0.110777000  | 5.352262000  | 7  | 2.794143000  | -1.804899000 | -3.524533000 |
| 1  | -3.126231000 | -0.824847000 | 5.701976000  | 7  | 4.184953000  | -0.030659000 | -2.524558000 |
| 1  | -3.475807000 | 0.815785000  | 5.166828000  | 7  | 1.925562000  | 0.693389000  | -3.989179000 |
| 6  | -1.785695000 | 0.652854000  | 6.472565000  | 6  | 4.106885000  | -2.297624000 | -3.153170000 |
| 1  | -1.287124000 | 1.581503000  | 6.183824000  | 1  | 4.476426000  | -3.018975000 | -3.885926000 |
| 1  | -1.017087000 | -0.062619000 | 6.775425000  | 1  | 4.113821000  | -2.788531000 | -2.166182000 |
| 1  | -2.401040000 | 0.857875000  | 7.354395000  | 6  | 4.991260000  | -1.071342000 | -3.129414000 |
| 7  | -4.226858000 | -0.337830000 | 2.341088000  | 1  | 5.901446000  | -1.262178000 | -2.549726000 |
| 7  | -3.329175000 | 1.884078000  | 2.976797000  | 1  | 5.300292000  | -0.818241000 | -4.155548000 |
| 6  | -4.496827000 | -1.794720000 | 2.387103000  | 6  | 4.851902000  | 1.254255000  | -2.234855000 |
| 6  | -2.612419000 | 3.172135000  | 3.095590000  | 6  | 5.789732000  | 1.063177000  | -1.037565000 |
| 6  | -5.263171000 | 0.530811000  | 2.872317000  | 1  | 5.224483000  | 0.755291000  | -0.154305000 |
| 1  | -5.467610000 | 0.346209000  | 3.939693000  | 1  | 6.310826000  | 1.996053000  | -0.800177000 |
| 1  | -6.203507000 | 0.400230000  | 2.329896000  | 1  | 6.552984000  | 0.304149000  | -1.230644000 |
| 6  | -4.743143000 | 1.937974000  | 2.670463000  | 6  | 3.838108000  | 2.339282000  | -1.879457000 |

|    |              |              |              |    |              |              |              |
|----|--------------|--------------|--------------|----|--------------|--------------|--------------|
| 1  | -4.932416000 | 2.259852000  | 1.635649000  | 1  | 3.191961000  | 2.580723000  | -2.724150000 |
| 1  | -5.264128000 | 2.636882000  | 3.332980000  | 1  | 4.369028000  | 3.249744000  | -1.588104000 |
| 6  | -3.539163000 | -2.533521000 | 1.456032000  | 1  | 3.192316000  | 2.042928000  | -1.050429000 |
| 1  | -3.729929000 | -2.265629000 | 0.409872000  | 6  | 5.683445000  | 1.731538000  | -3.431704000 |
| 1  | -3.694673000 | -3.612990000 | 1.539076000  | 1  | 6.520497000  | 1.060683000  | -3.644010000 |
| 1  | -2.493874000 | -2.323661000 | 1.680870000  | 1  | 6.104863000  | 2.720004000  | -3.227108000 |
| 6  | -5.919697000 | -2.058160000 | 1.882656000  | 1  | 5.072134000  | 1.805628000  | -4.333003000 |
| 1  | -6.684550000 | -1.723503000 | 2.588093000  | 6  | 1.745429000  | -2.821394000 | -3.760892000 |
| 1  | -6.060485000 | -3.133251000 | 1.741414000  | 6  | 1.460739000  | -3.649099000 | -2.506525000 |
| 1  | -6.095367000 | -1.565332000 | 0.921934000  | 1  | 2.350186000  | -4.181132000 | -2.155210000 |
| 6  | -4.369678000 | -2.384829000 | 3.796735000  | 1  | 0.692543000  | -4.400784000 | -2.710129000 |
| 1  | -3.334336000 | -2.368785000 | 4.140342000  | 1  | 1.096224000  | -3.004593000 | -1.704367000 |
| 1  | -4.709612000 | -3.425101000 | 3.805116000  | 6  | 2.200709000  | -3.742087000 | -4.897572000 |
| 1  | -4.981422000 | -1.834915000 | 4.517247000  | 1  | 2.491689000  | -3.156947000 | -5.774515000 |
| 6  | -1.100840000 | 2.967029000  | 3.136412000  | 1  | 1.381582000  | -4.406823000 | -5.185774000 |
| 1  | -0.809579000 | 2.291059000  | 3.941539000  | 1  | 3.041891000  | -4.379527000 | -4.612466000 |
| 1  | -0.615613000 | 3.931251000  | 3.311588000  | 6  | 0.452562000  | -2.143363000 | -4.198546000 |
| 1  | -0.721155000 | 2.562947000  | 2.196707000  | 1  | 0.053328000  | -1.506334000 | -3.408098000 |
| 6  | -3.042503000 | 3.858923000  | 4.397428000  | 1  | -0.299339000 | -2.906131000 | -4.418348000 |
| 1  | -4.120069000 | 4.043571000  | 4.431793000  | 1  | 0.601270000  | -1.542205000 | -5.097541000 |
| 1  | -2.546329000 | 4.829010000  | 4.497903000  | 6  | 2.498101000  | 0.625321000  | -5.324376000 |
| 1  | -2.774559000 | 3.249928000  | 5.264033000  | 1  | 1.848368000  | 0.039798000  | -5.993567000 |
| 6  | -2.944113000 | 4.083589000  | 1.910286000  | 1  | 3.430242000  | 0.060991000  | -5.262589000 |
| 1  | -2.685077000 | 3.599182000  | 0.966426000  | 6  | 2.761239000  | 1.981312000  | -5.966218000 |
| 1  | -2.371717000 | 5.013141000  | 1.981154000  | 1  | 3.299832000  | 1.844867000  | -6.908629000 |
| 1  | -4.002859000 | 4.357418000  | 1.881474000  | 1  | 3.364726000  | 2.627974000  | -5.324019000 |
| 3  | -2.669584000 | -0.360243000 | -0.183266000 | 1  | 1.837344000  | 2.517637000  | -6.196917000 |
| 7  | 1.720495000  | -1.770621000 | 0.474504000  | 6  | 0.813652000  | 1.607505000  | -3.791511000 |
| 15 | 2.618329000  | -3.029662000 | 0.496059000  | 1  | 1.150191000  | 2.638302000  | -3.970362000 |
| 7  | 3.399134000  | -3.581014000 | -0.952168000 | 1  | 0.542655000  | 1.560972000  | -2.735539000 |
| 7  | 1.938050000  | -4.578733000 | 0.740167000  | 6  | -0.409207000 | 1.327920000  | -4.654428000 |
| 7  | 3.853337000  | -2.943262000 | 1.654008000  | 1  | -0.174442000 | 1.335220000  | -5.723451000 |
| 6  | 2.590656000  | -4.634679000 | -1.537348000 | 1  | -1.165268000 | 2.099012000  | -4.482662000 |
| 1  | 3.172782000  | -5.232177000 | -2.244465000 | 1  | -0.860513000 | 0.362702000  | -4.418752000 |
| 1  | 1.711153000  | -4.240270000 | -2.071105000 | 7  | -1.731508000 | -1.757665000 | 0.030761000  |
| 6  | 2.137628000  | -5.488206000 | -0.366514000 | 15 | -2.730773000 | -2.931814000 | -0.077394000 |
| 1  | 1.214427000  | -6.020065000 | -0.625375000 | 7  | -2.176893000 | -4.549206000 | -0.135112000 |
| 1  | 2.900161000  | -6.248147000 | -0.130932000 | 7  | -3.640857000 | -3.171101000 | -1.534937000 |
| 6  | 1.015132000  | -4.963660000 | 1.814876000  | 7  | -3.888014000 | -2.923822000 | 1.163732000  |
| 6  | -0.434145000 | -4.818575000 | 1.339554000  | 6  | -2.595741000 | -5.266509000 | -1.318056000 |
| 1  | -0.626342000 | -3.779279000 | 1.065138000  | 1  | -3.450713000 | -5.931736000 | -1.111963000 |
| 1  | -1.140626000 | -5.113473000 | 2.123127000  | 1  | -1.787237000 | -5.887433000 | -1.721076000 |
| 1  | -0.633504000 | -5.441856000 | 0.462665000  | 6  | -2.997553000 | -4.205491000 | -2.322875000 |

|   |              |              |              |   |              |              |              |
|---|--------------|--------------|--------------|---|--------------|--------------|--------------|
| 6 | 1.223227000  | -4.080155000 | 3.042215000  | 1 | -2.103829000 | -3.837860000 | -2.853214000 |
| 1 | 2.219719000  | -4.220599000 | 3.465199000  | 1 | -3.683626000 | -4.621176000 | -3.065762000 |
| 1 | 0.484248000  | -4.338846000 | 3.806780000  | 6 | -4.245834000 | -2.045954000 | -2.274886000 |
| 1 | 1.103993000  | -3.025436000 | 2.787903000  | 6 | -3.222776000 | -1.322208000 | -3.157351000 |
| 6 | 1.284051000  | -6.414656000 | 2.226126000  | 1 | -2.394932000 | -0.961984000 | -2.542887000 |
| 1 | 1.081652000  | -7.121418000 | 1.416710000  | 1 | -3.682289000 | -0.466562000 | -3.661443000 |
| 1 | 0.641216000  | -6.689678000 | 3.067577000  | 1 | -2.815889000 | -1.978318000 | -3.932209000 |
| 1 | 2.324502000  | -6.542315000 | 2.538428000  | 6 | -4.847942000 | -1.042072000 | -1.294331000 |
| 6 | 4.060994000  | -2.653812000 | -1.890653000 | 1 | -5.590587000 | -1.514063000 | -0.649325000 |
| 6 | 3.061636000  | -1.993539000 | -2.847647000 | 1 | -5.339781000 | -0.239647000 | -1.850809000 |
| 1 | 2.580204000  | -2.724871000 | -3.502736000 | 1 | -4.079302000 | -0.590315000 | -0.664466000 |
| 1 | 3.565698000  | -1.263870000 | -3.488441000 | 6 | -5.381044000 | -2.587239000 | -3.149722000 |
| 1 | 2.283448000  | -1.478920000 | -2.279111000 | 1 | -5.018714000 | -3.234261000 | -3.953262000 |
| 6 | 5.099252000  | -3.434776000 | -2.702792000 | 1 | -5.917364000 | -1.759085000 | -3.622369000 |
| 1 | 5.801098000  | -3.945748000 | -2.038285000 | 1 | -6.091952000 | -3.157354000 | -2.545319000 |
| 1 | 5.666216000  | -2.752554000 | -3.343332000 | 6 | -1.346473000 | -5.253680000 | 0.850720000  |
| 1 | 4.641997000  | -4.182843000 | -3.356217000 | 6 | 0.076835000  | -5.424704000 | 0.309215000  |
| 6 | 4.795512000  | -1.561873000 | -1.116102000 | 1 | 0.088603000  | -5.976149000 | -0.635356000 |
| 1 | 4.101463000  | -0.941941000 | -0.545055000 | 1 | 0.699902000  | -5.979297000 | 1.019254000  |
| 1 | 5.325996000  | -0.913522000 | -1.818767000 | 1 | 0.529693000  | -4.447315000 | 0.135859000  |
| 1 | 5.527010000  | -1.986950000 | -0.427534000 | 6 | -1.945227000 | -6.633656000 | 1.147655000  |
| 6 | 4.690279000  | -4.092266000 | 1.943032000  | 1 | -2.972021000 | -6.543812000 | 1.512525000  |
| 1 | 4.253691000  | -4.955117000 | 1.437250000  | 1 | -1.355750000 | -7.140044000 | 1.917804000  |
| 1 | 4.636619000  | -4.318433000 | 3.018769000  | 1 | -1.951781000 | -7.280170000 | 0.265565000  |
| 6 | 6.150972000  | -3.955702000 | 1.535619000  | 6 | -1.273509000 | -4.475197000 | 2.160098000  |
| 1 | 6.628957000  | -3.085376000 | 1.995451000  | 1 | -0.910394000 | -3.458002000 | 1.995040000  |
| 1 | 6.246372000  | -3.863903000 | 0.451714000  | 1 | -0.587577000 | -4.985042000 | 2.842008000  |
| 1 | 6.714017000  | -4.840568000 | 1.849564000  | 1 | -2.251062000 | -4.414422000 | 2.640513000  |
| 6 | 4.188376000  | -1.686792000 | 2.293555000  | 6 | -4.807174000 | -4.033014000 | 1.334606000  |
| 1 | 3.390048000  | -0.989159000 | 2.033148000  | 1 | -4.663937000 | -4.482483000 | 2.329943000  |
| 1 | 5.117273000  | -1.267530000 | 1.874686000  | 1 | -4.530394000 | -4.806657000 | 0.616759000  |
| 6 | 4.326154000  | -1.775546000 | 3.807091000  | 6 | -6.280357000 | -3.694966000 | 1.151351000  |
| 1 | 4.475918000  | -0.775277000 | 4.225104000  | 1 | -6.478221000 | -3.346146000 | 0.135437000  |
| 1 | 5.180415000  | -2.385360000 | 4.116951000  | 1 | -6.620610000 | -2.924288000 | 1.849034000  |
| 1 | 3.428640000  | -2.200108000 | 4.264317000  | 1 | -6.892755000 | -4.585160000 | 1.326666000  |
| 6 | -0.862048000 | -1.046268000 | 4.112503000  | 6 | -4.065261000 | -1.766232000 | 2.016225000  |
| 1 | -0.859980000 | -1.618521000 | 3.182018000  | 1 | -5.027240000 | -1.274786000 | 1.804377000  |
| 1 | -1.036757000 | -1.768303000 | 4.922858000  | 1 | -3.286267000 | -1.055137000 | 1.735793000  |
| 6 | 0.501907000  | -0.394240000 | 4.274938000  | 6 | -3.972882000 | -2.063640000 | 3.506734000  |
| 1 | 0.582275000  | 0.180898000  | 5.199620000  | 1 | -2.996546000 | -2.480976000 | 3.766653000  |
| 1 | 0.691829000  | 0.287923000  | 3.444296000  | 1 | -4.741558000 | -2.766321000 | 3.843343000  |
| 1 | 1.292956000  | -1.148780000 | 4.274830000  | 1 | -4.107602000 | -1.141395000 | 4.080538000  |
| 7 | -1.315096000 | -0.512212000 | -1.621818000 | 7 | 1.383101000  | -0.098261000 | 1.680396000  |

|    |              |              |              |    |             |              |             |
|----|--------------|--------------|--------------|----|-------------|--------------|-------------|
| 15 | -2.346706000 | -0.735156000 | -2.746569000 | 15 | 2.468655000 | -0.184086000 | 2.772154000 |
| 7  | -3.980593000 | -0.387331000 | -2.171681000 | 7  | 3.311969000 | 1.198864000  | 3.348016000 |
| 7  | -2.809343000 | -2.304207000 | -3.274798000 | 7  | 3.949964000 | -0.883436000 | 2.121209000 |
| 7  | -2.015465000 | 0.103385000  | -4.177983000 | 7  | 1.996190000 | -0.980187000 | 4.184321000 |
| 6  | -4.898839000 | -1.442240000 | -2.579121000 | 6  | 4.639060000 | 1.285769000  | 2.770630000 |
| 1  | -5.361325000 | -1.233157000 | -3.554149000 | 1  | 5.320488000 | 1.830840000  | 3.430328000 |
| 1  | -5.703631000 | -1.570429000 | -1.849230000 | 1  | 4.640602000 | 1.799494000  | 1.797060000 |
| 6  | -4.066679000 | -2.701022000 | -2.669406000 | 6  | 5.111387000 | -0.142473000 | 2.594943000 |
| 1  | -3.931406000 | -3.132739000 | -1.666448000 | 1  | 5.929102000 | -0.184105000 | 1.870631000 |
| 1  | -4.577838000 | -3.448659000 | -3.282089000 | 1  | 5.494306000 | -0.533596000 | 3.548978000 |
| 6  | -1.828174000 | -3.392328000 | -3.507649000 | 6  | 4.149950000 | -2.343035000 | 1.899141000 |
| 6  | -1.496240000 | -4.137228000 | -2.211376000 | 6  | 5.306605000 | -2.525174000 | 0.910370000 |
| 1  | -1.078683000 | -3.449672000 | -1.472617000 | 1  | 5.159787000 | -1.913766000 | 0.014620000 |
| 1  | -0.756142000 | -4.919385000 | -2.406257000 | 1  | 5.362437000 | -3.571876000 | 0.598919000 |
| 1  | -2.372825000 | -4.627309000 | -1.778173000 | 1  | 6.274849000 | -2.267697000 | 1.347618000 |
| 6  | -0.533355000 | -2.823956000 | -4.076870000 | 6  | 2.897833000 | -2.961515000 | 1.280074000 |
| 1  | -0.703392000 | -2.293747000 | -5.015691000 | 1  | 2.013282000 | -2.820070000 | 1.901667000 |
| 1  | 0.161347000  | -3.643999000 | -4.278102000 | 1  | 3.055120000 | -4.036557000 | 1.155487000 |
| 1  | -0.056280000 | -2.146398000 | -3.367302000 | 1  | 2.673522000 | -2.559010000 | 0.285938000 |
| 6  | -2.414891000 | -4.365957000 | -4.533538000 | 6  | 4.477858000 | -3.107989000 | 3.185048000 |
| 1  | -3.289911000 | -4.899765000 | -4.153104000 | 1  | 5.327964000 | -2.674970000 | 3.718990000 |
| 1  | -1.670165000 | -5.121931000 | -4.798287000 | 1  | 4.740879000 | -4.142429000 | 2.944902000 |
| 1  | -2.704508000 | -3.836424000 | -5.445327000 | 1  | 3.620100000 | -3.128415000 | 3.856544000 |
| 6  | -4.567045000 | 0.979870000  | -2.115152000 | 6  | 2.614197000 | 2.481305000  | 3.609836000 |
| 6  | -5.704410000 | 0.973907000  | -1.088957000 | 6  | 2.465647000 | 3.314374000  | 2.333200000 |
| 1  | -6.558882000 | 0.376780000  | -1.418502000 | 1  | 3.431731000 | 3.592133000  | 1.901809000 |
| 1  | -6.067723000 | 1.993898000  | -0.933603000 | 1  | 1.933066000 | 4.244813000  | 2.551717000 |
| 1  | -5.360241000 | 0.585257000  | -0.125641000 | 1  | 1.891047000 | 2.765487000  | 1.584093000 |
| 6  | -5.120843000 | 1.442154000  | -3.465318000 | 6  | 3.414859000 | 3.268428000  | 4.650336000 |
| 1  | -4.327291000 | 1.480063000  | -4.209886000 | 1  | 3.576227000 | 2.669288000  | 5.550751000 |
| 1  | -5.546509000 | 2.445494000  | -3.371481000 | 1  | 2.870232000 | 4.173310000  | 4.934337000 |
| 1  | -5.916608000 | 0.790053000  | -3.834738000 | 1  | 4.390047000 | 3.587649000  | 4.272445000 |
| 6  | -3.515730000 | 1.986180000  | -1.655464000 | 6  | 1.217925000 | 2.220138000  | 4.170562000 |
| 1  | -3.121607000 | 1.764233000  | -0.658089000 | 1  | 0.590732000 | 1.698252000  | 3.446037000 |
| 1  | -3.968094000 | 2.980584000  | -1.604611000 | 1  | 0.741552000 | 3.176681000  | 4.401603000 |
| 1  | -2.671621000 | 2.040716000  | -2.342460000 | 1  | 1.250103000 | 1.631481000  | 5.087251000 |
| 6  | -2.637713000 | -0.256936000 | -5.448136000 | 6  | 2.866373000 | -1.086404000 | 5.347680000 |
| 1  | -3.607244000 | -0.710654000 | -5.234129000 | 1  | 3.842258000 | -0.680885000 | 5.075910000 |
| 1  | -2.056044000 | -1.039889000 | -5.957834000 | 1  | 3.031773000 | -2.146035000 | 5.582080000 |
| 6  | -2.824414000 | 0.902869000  | -6.416424000 | 6  | 2.378851000 | -0.387831000 | 6.609366000 |
| 1  | -1.873101000 | 1.307089000  | -6.770102000 | 1  | 2.359440000 | 0.696655000  | 6.492554000 |
| 1  | -3.391702000 | 1.728173000  | -5.979752000 | 1  | 3.054265000 | -0.620198000 | 7.438445000 |
| 1  | -3.372901000 | 0.551232000  | -7.295007000 | 1  | 1.378633000 | -0.715520000 | 6.904820000 |



|   |              |              |              |   |              |              |             |
|---|--------------|--------------|--------------|---|--------------|--------------|-------------|
| 6 | -0.891762000 | 1.032565000  | -4.218727000 | 6 | 0.624511000  | -1.447621000 | 4.333324000 |
| 1 | -0.600879000 | 1.224727000  | -3.184964000 | 1 | 0.159552000  | -1.377135000 | 3.348247000 |
| 1 | -1.236818000 | 1.989461000  | -4.630769000 | 1 | 0.060796000  | -0.766491000 | 4.987960000 |
| 6 | 0.324389000  | 0.550004000  | -4.996588000 | 6 | 0.515852000  | -2.867323000 | 4.866200000 |
| 1 | 1.072010000  | 1.347409000  | -5.043558000 | 1 | 1.062285000  | -3.572469000 | 4.233648000 |
| 1 | 0.080238000  | 0.270168000  | -6.026144000 | 1 | -0.532281000 | -3.177535000 | 4.881542000 |
| 1 | 0.788476000  | -0.312318000 | -4.514936000 | 1 | 0.897333000  | -2.963413000 | 5.887169000 |

**Table S11.** Cartesian coordinates for the optimized geometries of **2-Ce<sup>Na</sup>** and **2-Ce<sup>K</sup>**.

| 2-Ce <sup>Na</sup> |              |              |              | 2-Ce <sup>K</sup> |              |              |              |
|--------------------|--------------|--------------|--------------|-------------------|--------------|--------------|--------------|
| 58                 | -0.284704000 | -0.031760000 | -0.030847000 | 58                | -0.199123000 | -0.016025000 | -0.084211000 |
| 11                 | 3.069606000  | -0.123309000 | 0.021435000  | 19                | 3.340782000  | 0.962276000  | 0.359484000  |
| 15                 | 2.366752000  | -0.431273000 | 2.855980000  | 15                | 2.142409000  | -0.598066000 | 2.998435000  |
| 7                  | 1.381134000  | -0.341328000 | 1.677524000  | 7                 | 1.354649000  | -0.216182000 | 1.732570000  |
| 7                  | 3.947878000  | 0.272698000  | 2.510779000  | 7                 | 3.531998000  | 0.448815000  | 3.325353000  |
| 7                  | 3.094761000  | -1.929338000 | 3.314557000  | 7                 | 3.155048000  | -1.990650000 | 3.067544000  |
| 7                  | 1.790280000  | 0.203725000  | 4.316622000  | 7                 | 1.195696000  | -0.737866000 | 4.401134000  |
| 6                  | 5.016494000  | -0.566968000 | 3.029445000  | 6                 | 4.675766000  | -0.334088000 | 3.761583000  |
| 1                  | 5.285530000  | -0.313939000 | 4.065730000  | 1                 | 4.679068000  | -0.516599000 | 4.847363000  |
| 1                  | 5.924529000  | -0.470350000 | 2.426768000  | 1                 | 5.617785000  | 0.162177000  | 3.508555000  |
| 6                  | 4.496932000  | -1.989072000 | 2.960043000  | 6                 | 4.557729000  | -1.644905000 | 3.020200000  |
| 1                  | 4.659846000  | -2.394194000 | 1.948254000  | 1                 | 4.931833000  | -1.522598000 | 1.988451000  |
| 1                  | 5.054450000  | -2.625857000 | 3.653661000  | 1                 | 5.174903000  | -2.414310000 | 3.494429000  |
| 6                  | 4.214242000  | 1.734578000  | 2.500802000  | 6                 | 3.422327000  | 1.806184000  | 3.910220000  |
| 6                  | 3.057450000  | 2.486887000  | 1.847423000  | 6                 | 2.268369000  | 2.570279000  | 3.269038000  |
| 1                  | 2.921907000  | 2.230151000  | 0.791966000  | 1                 | 2.451395000  | 2.786315000  | 2.212604000  |
| 1                  | 3.261924000  | 3.559876000  | 1.888642000  | 1                 | 2.146776000  | 3.533214000  | 3.772109000  |
| 1                  | 2.107837000  | 2.304282000  | 2.350385000  | 1                 | 1.323750000  | 2.031650000  | 3.327178000  |
| 6                  | 5.479747000  | 1.994933000  | 1.674442000  | 6                 | 4.714977000  | 2.579746000  | 3.618273000  |
| 1                  | 6.385539000  | 1.636522000  | 2.170053000  | 1                 | 5.566733000  | 2.210997000  | 4.195200000  |
| 1                  | 5.603435000  | 3.069417000  | 1.514582000  | 1                 | 4.582069000  | 3.633403000  | 3.878285000  |
| 1                  | 5.421462000  | 1.517300000  | 0.689664000  | 1                 | 4.980046000  | 2.530465000  | 2.556009000  |
| 6                  | 4.424049000  | 2.318564000  | 3.902810000  | 6                 | 3.209231000  | 1.791383000  | 5.429099000  |
| 1                  | 3.502035000  | 2.275555000  | 4.481675000  | 1                 | 2.235928000  | 1.372369000  | 5.680573000  |
| 1                  | 4.727240000  | 3.367177000  | 3.828632000  | 1                 | 3.251099000  | 2.810385000  | 5.825864000  |
| 1                  | 5.207946000  | 1.795060000  | 4.456599000  | 1                 | 3.979194000  | 1.211328000  | 5.944837000  |
| 6                  | 2.340501000  | -3.203467000 | 3.245774000  | 6                 | 2.783501000  | -3.331942000 | 2.567758000  |
| 6                  | 2.301815000  | -3.761837000 | 1.819257000  | 6                 | 3.397447000  | -3.591642000 | 1.188957000  |
| 1                  | 1.810325000  | -3.050116000 | 1.152556000  | 1                 | 3.064733000  | -2.833830000 | 0.474977000  |
| 1                  | 1.734641000  | -4.696594000 | 1.791785000  | 1                 | 3.080633000  | -4.566452000 | 0.809811000  |
| 1                  | 3.301505000  | -3.983057000 | 1.432477000  | 1                 | 4.491278000  | -3.593250000 | 1.214463000  |
| 6                  | 0.902540000  | -2.990798000 | 3.713741000  | 6                 | 1.269529000  | -3.483373000 | 2.452550000  |

|    |              |              |              |    |              |              |              |
|----|--------------|--------------|--------------|----|--------------|--------------|--------------|
| 1  | 0.861422000  | -2.594083000 | 4.728668000  | 1  | 0.769326000  | -3.258708000 | 3.395699000  |
| 1  | 0.377960000  | -3.950064000 | 3.705707000  | 1  | 1.041111000  | -4.518644000 | 2.186057000  |
| 1  | 0.368076000  | -2.308760000 | 3.050931000  | 1  | 0.846464000  | -2.835083000 | 1.684413000  |
| 6  | 3.006596000  | -4.219946000 | 4.176699000  | 6  | 3.296522000  | -4.382146000 | 3.560163000  |
| 1  | 3.997084000  | -4.522766000 | 3.825653000  | 1  | 4.384528000  | -4.357304000 | 3.669279000  |
| 1  | 2.396701000  | -5.125735000 | 4.234556000  | 1  | 3.031107000  | -5.387469000 | 3.219637000  |
| 1  | 3.110271000  | -3.813338000 | 5.186751000  | 1  | 2.852858000  | -4.228603000 | 4.547079000  |
| 6  | 0.411321000  | 0.662542000  | 4.416091000  | 6  | -0.209266000 | -0.356127000 | 4.376897000  |
| 1  | -0.223764000 | -0.114589000 | 4.867614000  | 1  | -0.838912000 | -1.248660000 | 4.490741000  |
| 1  | 0.049123000  | 0.795185000  | 3.395087000  | 1  | -0.414965000 | 0.033843000  | 3.378417000  |
| 6  | 0.259729000  | 1.958049000  | 5.197088000  | 6  | -0.595906000 | 0.672540000  | 5.429747000  |
| 1  | -0.776376000 | 2.302057000  | 5.145919000  | 1  | -1.665727000 | 0.887049000  | 5.362522000  |
| 1  | 0.893275000  | 2.746942000  | 4.782592000  | 1  | -0.060785000 | 1.615283000  | 5.289180000  |
| 1  | 0.510394000  | 1.843673000  | 6.256013000  | 1  | -0.399937000 | 0.323218000  | 6.448409000  |
| 6  | 2.537680000  | 0.088306000  | 5.560432000  | 6  | 1.703530000  | -1.294802000 | 5.646395000  |
| 1  | 2.651341000  | 1.085361000  | 6.005914000  | 1  | 1.791798000  | -0.512453000 | 6.413562000  |
| 1  | 3.547394000  | -0.247469000 | 5.320713000  | 1  | 2.715804000  | -1.655618000 | 5.455595000  |
| 6  | 1.948668000  | -0.845319000 | 6.608590000  | 6  | 0.874519000  | -2.435874000 | 6.222457000  |
| 1  | 0.912168000  | -0.595011000 | 6.850148000  | 1  | -0.131875000 | -2.117572000 | 6.506171000  |
| 1  | 2.526164000  | -0.769227000 | 7.535242000  | 1  | 1.358901000  | -2.819393000 | 7.125614000  |
| 1  | 1.980077000  | -1.885336000 | 6.281020000  | 1  | 0.775535000  | -3.265009000 | 5.518387000  |
| 15 | 2.448131000  | 0.214616000  | -2.855877000 | 15 | 2.470827000  | 0.985819000  | -2.802184000 |
| 7  | 1.457512000  | 0.067991000  | -1.685539000 | 7  | 1.518975000  | 0.628420000  | -1.645748000 |
| 7  | 4.076172000  | -0.366612000 | -2.471907000 | 7  | 4.148505000  | 0.519931000  | -2.561908000 |
| 7  | 3.085504000  | 1.741806000  | -3.344163000 | 7  | 2.960373000  | 2.620297000  | -3.110381000 |
| 7  | 1.904016000  | -0.447096000 | -4.314419000 | 7  | 1.951174000  | 0.471163000  | -4.332180000 |
| 6  | 5.084122000  | 0.605818000  | -2.856118000 | 6  | 5.066941000  | 1.591349000  | -2.886718000 |
| 1  | 5.442759000  | 0.452319000  | -3.884266000 | 1  | 5.391821000  | 1.566705000  | -3.937776000 |
| 1  | 5.957466000  | 0.563561000  | -2.193635000 | 1  | 5.973192000  | 1.547320000  | -2.268984000 |
| 6  | 4.396548000  | 1.947599000  | -2.759687000 | 6  | 4.299726000  | 2.868350000  | -2.623413000 |
| 1  | 4.349763000  | 2.274993000  | -1.705998000 | 1  | 4.330206000  | 3.116382000  | -1.544255000 |
| 1  | 4.958081000  | 2.705580000  | -3.311002000 | 1  | 4.763887000  | 3.705993000  | -3.150098000 |
| 6  | 4.520173000  | -1.782929000 | -2.435563000 | 6  | 4.694044000  | -0.856036000 | -2.603666000 |
| 6  | 3.330676000  | -2.737265000 | -2.483011000 | 6  | 3.577939000  | -1.888908000 | -2.728439000 |
| 1  | 3.667454000  | -3.752737000 | -2.257393000 | 1  | 3.987781000  | -2.891078000 | -2.576106000 |
| 1  | 2.864341000  | -2.751533000 | -3.469131000 | 1  | 3.116643000  | -1.863509000 | -3.717352000 |
| 1  | 2.561178000  | -2.466406000 | -1.756700000 | 1  | 2.792493000  | -1.722426000 | -1.988641000 |
| 6  | 5.277418000  | -2.022416000 | -1.121822000 | 6  | 5.459769000  | -1.125143000 | -1.300463000 |
| 1  | 6.054953000  | -1.271163000 | -0.954895000 | 1  | 6.181662000  | -0.331134000 | -1.082459000 |
| 1  | 5.764878000  | -3.002104000 | -1.125982000 | 1  | 6.019164000  | -2.063595000 | -1.361360000 |
| 1  | 4.600933000  | -2.019993000 | -0.260241000 | 1  | 4.774651000  | -1.226293000 | -0.453626000 |
| 6  | 5.469660000  | -2.124176000 | -3.591011000 | 6  | 5.668587000  | -1.046900000 | -3.772844000 |
| 1  | 5.027798000  | -1.882928000 | -4.559239000 | 1  | 5.204541000  | -0.787621000 | -4.726421000 |

|    |              |              |              |    |              |              |              |
|----|--------------|--------------|--------------|----|--------------|--------------|--------------|
| 1  | 5.686918000  | -3.195986000 | -3.581038000 | 1  | 5.977108000  | -2.094808000 | -3.825567000 |
| 1  | 6.425826000  | -1.599464000 | -3.511705000 | 1  | 6.576419000  | -0.447184000 | -3.660901000 |
| 6  | 2.232530000  | 2.947852000  | -3.486195000 | 6  | 2.004595000  | 3.749428000  | -3.025895000 |
| 6  | 1.971016000  | 3.618642000  | -2.136061000 | 6  | 1.701300000  | 4.129374000  | -1.573554000 |
| 1  | 1.441795000  | 2.935411000  | -1.467912000 | 1  | 1.223379000  | 3.292783000  | -1.058898000 |
| 1  | 1.346846000  | 4.507089000  | -2.267831000 | 1  | 1.017532000  | 4.982126000  | -1.533930000 |
| 1  | 2.895824000  | 3.946005000  | -1.650931000 | 1  | 2.605522000  | 4.421811000  | -1.028132000 |
| 6  | 0.890120000  | 2.576878000  | -4.106291000 | 6  | 0.696453000  | 3.373571000  | -3.713172000 |
| 1  | 1.014887000  | 2.091043000  | -5.074422000 | 1  | 0.862466000  | 3.085670000  | -4.752353000 |
| 1  | 0.299033000  | 3.485868000  | -4.248754000 | 1  | 0.018739000  | 4.231843000  | -3.693617000 |
| 1  | 0.324735000  | 1.910045000  | -3.454550000 | 1  | 0.204987000  | 2.547054000  | -3.199077000 |
| 6  | 2.933820000  | 3.930534000  | -4.428781000 | 6  | 2.597726000  | 4.954353000  | -3.761683000 |
| 1  | 3.845987000  | 4.352118000  | -3.997748000 | 1  | 3.455497000  | 5.388281000  | -3.240237000 |
| 1  | 2.269186000  | 4.770595000  | -4.648760000 | 1  | 1.844112000  | 5.742103000  | -3.844667000 |
| 1  | 3.191530000  | 3.442231000  | -5.372813000 | 1  | 2.911054000  | 4.674804000  | -4.771745000 |
| 6  | 0.766918000  | -1.361871000 | -4.303594000 | 6  | 0.899980000  | -0.533009000 | -4.432516000 |
| 1  | 0.628483000  | -1.724588000 | -3.283283000 | 1  | 0.772260000  | -0.990008000 | -3.449282000 |
| 1  | 1.025739000  | -2.236252000 | -4.918711000 | 1  | 1.243562000  | -1.330188000 | -5.108778000 |
| 6  | -0.545545000 | -0.759227000 | -4.781739000 | 6  | -0.447730000 | -0.001893000 | -4.895770000 |
| 1  | -1.324808000 | -1.527593000 | -4.798893000 | 1  | -1.166894000 | -0.822670000 | -4.971954000 |
| 1  | -0.470922000 | -0.332600000 | -5.784135000 | 1  | -0.394534000 | 0.490453000  | -5.868742000 |
| 1  | -0.875809000 | 0.030231000  | -4.104661000 | 1  | -0.843201000 | 0.718491000  | -4.178600000 |
| 6  | 2.765340000  | -0.497179000 | -5.482381000 | 6  | 2.816118000  | 0.619711000  | -5.488269000 |
| 1  | 3.208512000  | -1.502899000 | -5.577897000 | 1  | 3.349132000  | -0.326229000 | -5.684943000 |
| 1  | 3.587631000  | 0.202780000  | -5.317076000 | 1  | 3.571952000  | 1.368472000  | -5.242100000 |
| 6  | 2.088426000  | -0.154850000 | -6.801636000 | 6  | 2.116235000  | 1.044318000  | -6.771173000 |
| 1  | 1.308140000  | -0.874257000 | -7.061124000 | 1  | 1.417717000  | 0.284788000  | -7.129835000 |
| 1  | 2.827354000  | -0.172338000 | -7.608931000 | 1  | 2.858364000  | 1.200718000  | -7.560486000 |
| 1  | 1.638559000  | 0.840318000  | -6.776666000 | 1  | 1.564150000  | 1.977301000  | -6.634556000 |
| 15 | -2.578546000 | -3.093188000 | -0.215505000 | 15 | -2.050925000 | -3.320357000 | -0.766395000 |
| 7  | -1.694131000 | -1.826854000 | -0.270568000 | 7  | -1.285238000 | -1.989953000 | -0.581337000 |
| 7  | -3.252785000 | -3.629953000 | 1.291161000  | 7  | -2.839599000 | -4.092167000 | 0.575815000  |
| 7  | -1.904932000 | -4.640555000 | -0.487567000 | 7  | -1.209896000 | -4.764644000 | -1.125989000 |
| 7  | -3.893711000 | -3.037497000 | -1.284226000 | 7  | -3.243715000 | -3.246526000 | -1.972755000 |
| 6  | -2.408690000 | -4.682556000 | 1.825752000  | 6  | -2.003332000 | -5.169244000 | 1.070172000  |
| 1  | -2.941850000 | -5.274344000 | 2.575126000  | 1  | -2.591781000 | -5.894657000 | 1.639104000  |
| 1  | -1.493476000 | -4.287838000 | 2.294064000  | 1  | -1.194918000 | -4.806564000 | 1.722738000  |
| 6  | -2.038416000 | -5.544639000 | 0.632280000  | 6  | -1.412717000 | -5.824317000 | -0.165394000 |
| 1  | -1.104315000 | -6.082685000 | 0.833530000  | 1  | -0.471538000 | -6.326305000 | 0.089643000  |
| 1  | -2.820004000 | -6.300586000 | 0.450897000  | 1  | -2.099120000 | -6.595897000 | -0.551686000 |
| 6  | -3.837837000 | -2.687046000 | 2.265217000  | 6  | -3.590608000 | -3.322008000 | 1.585850000  |
| 6  | -4.635731000 | -1.609647000 | 1.533213000  | 6  | -4.406212000 | -2.227789000 | 0.900916000  |
| 1  | -5.101789000 | -0.942609000 | 2.263978000  | 1  | -4.995540000 | -1.689896000 | 1.648487000  |

|    |              |              |              |    |              |              |              |
|----|--------------|--------------|--------------|----|--------------|--------------|--------------|
| 1  | -5.425286000 | -2.047045000 | 0.920296000  | 1  | -5.093362000 | -2.647776000 | 0.164733000  |
| 1  | -3.993091000 | -1.006188000 | 0.889205000  | 1  | -3.760454000 | -1.504800000 | 0.398767000  |
| 6  | -2.766309000 | -2.007946000 | 3.126419000  | 6  | -2.662090000 | -2.675585000 | 2.620200000  |
| 1  | -2.042585000 | -1.494893000 | 2.489356000  | 1  | -1.927555000 | -2.041620000 | 2.119532000  |
| 1  | -2.224861000 | -2.727281000 | 3.747431000  | 1  | -2.122245000 | -3.425233000 | 3.206683000  |
| 1  | -3.221150000 | -1.274077000 | 3.799112000  | 1  | -3.234821000 | -2.062335000 | 3.323076000  |
| 6  | -4.805037000 | -3.455197000 | 3.171631000  | 6  | -4.568830000 | -4.261008000 | 2.299081000  |
| 1  | -5.325774000 | -2.761775000 | 3.838877000  | 1  | -5.213816000 | -3.688085000 | 2.971985000  |
| 1  | -4.293438000 | -4.185902000 | 3.804146000  | 1  | -4.058728000 | -5.013193000 | 2.907072000  |
| 1  | -5.552321000 | -3.984414000 | 2.574178000  | 1  | -5.203215000 | -4.779331000 | 1.574746000  |
| 6  | -1.074112000 | -5.040942000 | -1.629314000 | 6  | -0.228508000 | -4.961381000 | -2.199691000 |
| 6  | 0.408769000  | -4.913117000 | -1.266306000 | 6  | 1.187677000  | -4.805265000 | -1.637347000 |
| 1  | 0.635093000  | -3.875378000 | -1.013443000 | 1  | 1.311350000  | -3.800576000 | -1.228731000 |
| 1  | 1.050368000  | -5.221657000 | -2.098829000 | 1  | 1.945461000  | -4.967879000 | -2.411484000 |
| 1  | 0.664696000  | -5.536092000 | -0.403996000 | 1  | 1.376702000  | -5.524810000 | -0.834463000 |
| 6  | -1.363588000 | -4.160065000 | -2.842377000 | 6  | -0.434562000 | -3.940862000 | -3.316311000 |
| 1  | -2.388656000 | -4.295250000 | -3.191953000 | 1  | -1.400710000 | -4.081340000 | -3.804463000 |
| 1  | -0.683342000 | -4.428945000 | -3.656375000 | 1  | 0.352989000  | -4.059794000 | -4.066706000 |
| 1  | -1.219045000 | -3.104282000 | -2.604666000 | 1  | -0.392989000 | -2.921554000 | -2.928277000 |
| 6  | -1.390497000 | -6.490322000 | -2.012262000 | 6  | -0.394340000 | -6.360283000 | -2.802824000 |
| 1  | -1.134742000 | -7.196334000 | -1.217311000 | 1  | -0.182479000 | -7.153614000 | -2.080613000 |
| 1  | -0.817346000 | -6.776156000 | -2.899272000 | 1  | 0.296660000  | -6.489388000 | -3.641170000 |
| 1  | -2.453182000 | -6.606984000 | -2.243353000 | 1  | -1.411755000 | -6.503109000 | -3.178038000 |
| 6  | -4.285323000 | -1.798426000 | -1.923341000 | 6  | -3.703935000 | -1.978045000 | -2.498828000 |
| 1  | -3.496230000 | -1.077218000 | -1.702929000 | 1  | -2.976966000 | -1.228870000 | -2.178564000 |
| 1  | -5.207449000 | -1.400445000 | -1.470999000 | 1  | -4.666552000 | -1.688427000 | -2.048089000 |
| 6  | -4.477909000 | -1.907221000 | -3.429573000 | 6  | -3.843514000 | -1.954397000 | -4.014466000 |
| 1  | -5.299344000 | -2.577273000 | -3.701662000 | 1  | -4.645264000 | -2.607390000 | -4.372721000 |
| 1  | -3.570588000 | -2.269318000 | -3.919547000 | 1  | -2.915930000 | -2.264547000 | -4.502532000 |
| 1  | -4.715406000 | -0.923700000 | -3.846761000 | 1  | -4.079319000 | -0.940604000 | -4.351715000 |
| 6  | -4.736930000 | -4.199166000 | -1.491834000 | 6  | -3.957468000 | -4.440153000 | -2.385124000 |
| 1  | -4.268936000 | -5.043729000 | -0.983645000 | 1  | -3.441841000 | -5.300682000 | -1.956133000 |
| 1  | -4.742083000 | -4.460265000 | -2.561254000 | 1  | -3.870091000 | -4.554955000 | -3.476053000 |
| 6  | -6.173441000 | -4.056946000 | -1.007658000 | 6  | -5.428288000 | -4.491897000 | -1.994132000 |
| 1  | -6.207402000 | -3.918646000 | 0.075090000  | 1  | -5.539820000 | -4.515411000 | -0.908271000 |
| 1  | -6.743582000 | -4.959533000 | -1.250249000 | 1  | -5.895873000 | -5.394201000 | -2.401595000 |
| 1  | -6.686799000 | -3.211869000 | -1.476087000 | 1  | -5.988361000 | -3.633202000 | -2.376775000 |
| 15 | -2.257554000 | 3.244509000  | 0.193704000  | 15 | -2.654111000 | 2.884827000  | 0.457513000  |
| 7  | -1.426402000 | 1.942658000  | 0.199559000  | 7  | -1.682688000 | 1.691102000  | 0.327644000  |
| 7  | -3.083485000 | 3.756917000  | -1.246242000 | 7  | -3.454722000 | 3.533093000  | -0.941526000 |
| 7  | -1.493438000 | 4.771765000  | 0.317273000  | 7  | -2.075508000 | 4.444051000  | 0.865337000  |
| 7  | -3.446005000 | 3.272491000  | 1.407067000  | 7  | -3.905219000 | 2.610284000  | 1.572758000  |
| 6  | -2.291487000 | 4.778370000  | -1.904272000 | 6  | -2.737025000 | 4.712960000  | -1.385374000 |

|   |              |             |              |   |              |             |              |
|---|--------------|-------------|--------------|---|--------------|-------------|--------------|
| 1 | -2.897570000 | 5.357377000 | -2.606316000 | 1 | -3.359406000 | 5.332787000 | -2.036616000 |
| 1 | -1.435955000 | 4.358832000 | -2.458792000 | 1 | -1.813449000 | 4.464641000 | -1.933401000 |
| 6 | -1.790247000 | 5.662987000 | -0.781007000 | 6 | -2.391440000 | 5.459898000 | -0.112491000 |
| 1 | -0.901875000 | 6.220038000 | -1.100316000 | 1 | -1.544122000 | 6.134169000 | -0.284476000 |
| 1 | -2.563407000 | 6.402278000 | -0.512453000 | 1 | -3.246536000 | 6.080680000 | 0.203448000  |
| 6 | -3.799406000 | 2.803921000 | -2.116443000 | 6 | -4.020807000 | 2.663097000 | -1.990498000 |
| 6 | -4.572557000 | 1.802925000 | -1.261313000 | 6 | -4.705105000 | 1.455965000 | -1.352808000 |
| 1 | -3.900153000 | 1.192367000 | -0.655691000 | 1 | -3.990444000 | 0.833566000 | -0.810906000 |
| 1 | -5.141683000 | 1.132020000 | -1.910261000 | 1 | -5.160507000 | 0.841566000 | -2.134371000 |
| 1 | -5.274143000 | 2.308626000 | -0.596226000 | 1 | -5.490938000 | 1.763362000 | -0.661307000 |
| 6 | -2.842650000 | 2.037582000 | -3.035886000 | 6 | -2.944317000 | 2.163896000 | -2.958590000 |
| 1 | -2.324227000 | 2.704086000 | -3.731134000 | 1 | -2.481858000 | 2.984535000 | -3.514558000 |
| 1 | -3.385333000 | 1.299309000 | -3.634016000 | 1 | -3.371338000 | 1.472866000 | -3.691645000 |
| 1 | -2.092094000 | 1.519287000 | -2.435092000 | 1 | -2.162655000 | 1.644678000 | -2.399593000 |
| 6 | -4.813424000 | 3.576557000 | -2.966084000 | 6 | -5.081490000 | 3.450167000 | -2.766482000 |
| 1 | -5.466294000 | 4.180852000 | -2.330069000 | 1 | -5.831109000 | 3.860930000 | -2.084500000 |
| 1 | -5.436063000 | 2.877718000 | -3.532502000 | 1 | -5.588432000 | 2.792872000 | -3.479214000 |
| 1 | -4.333841000 | 4.238731000 | -3.692102000 | 1 | -4.652921000 | 4.275832000 | -3.341159000 |
| 6 | -0.606200000 | 5.252030000 | 1.384166000  | 6 | -1.292544000 | 4.827085000 | 2.045995000  |
| 6 | 0.834721000  | 5.324157000 | 0.866985000  | 6 | 0.166759000  | 5.064884000 | 1.642355000  |
| 1 | 1.169593000  | 4.331837000 | 0.561637000  | 1 | 0.591013000  | 4.145818000 | 1.234474000  |
| 1 | 1.509351000  | 5.700768000 | 1.643505000  | 1 | 0.767397000  | 5.380502000 | 2.501986000  |
| 1 | 0.924437000  | 5.992595000 | 0.005733000  | 1 | 0.252139000  | 5.845056000 | 0.880376000  |
| 6 | -0.642942000 | 4.314895000 | 2.587108000  | 6 | -1.337482000 | 3.732146000 | 3.108674000  |
| 1 | -1.629416000 | 4.307841000 | 3.053034000  | 1 | -2.348530000 | 3.602146000 | 3.497174000  |
| 1 | 0.084755000  | 4.654202000 | 3.329731000  | 1 | -0.682951000 | 4.008497000 | 3.940630000  |
| 1 | -0.398736000 | 3.290583000 | 2.296798000  | 1 | -1.004040000 | 2.774236000 | 2.703200000  |
| 6 | -1.047143000 | 6.645600000 | 1.847680000  | 6 | -1.864350000 | 6.110757000 | 2.659291000  |
| 1 | -0.973840000 | 7.388987000 | 1.048739000  | 1 | -1.794407000 | 6.962461000 | 1.976708000  |
| 1 | -0.410222000 | 6.986877000 | 2.669348000  | 1 | -1.310142000 | 6.372967000 | 3.565594000  |
| 1 | -2.080139000 | 6.629925000 | 2.205354000  | 1 | -2.914748000 | 5.977732000 | 2.932244000  |
| 6 | -3.826039000 | 2.063334000 | 2.108280000  | 6 | -4.188536000 | 1.278516000 | 2.065295000  |
| 1 | -3.107895000 | 1.297008000 | 1.810693000  | 1 | -3.354681000 | 0.649673000 | 1.747640000  |
| 1 | -4.814147000 | 1.711404000 | 1.773085000  | 1 | -5.089972000 | 0.866231000 | 1.585216000  |
| 6 | -3.834585000 | 2.197953000 | 3.624483000  | 6 | -4.351739000 | 1.197690000 | 3.576478000  |
| 1 | -4.574875000 | 2.921971000 | 3.978858000  | 1 | -5.221727000 | 1.755552000 | 3.936526000  |
| 1 | -2.855150000 | 2.507485000 | 3.998394000  | 1 | -3.468115000 | 1.585632000 | 4.089576000  |
| 1 | -4.081161000 | 1.235232000 | 4.082925000  | 1 | -4.489618000 | 0.155784000 | 3.881864000  |
| 6 | -4.219528000 | 4.471278000 | 1.669024000  | 6 | -4.822244000 | 3.671603000 | 1.942119000  |
| 1 | -3.790586000 | 5.279654000 | 1.075107000  | 1 | -4.445983000 | 4.600688000 | 1.511589000  |
| 1 | -4.087557000 | 4.770052000 | 2.720651000  | 1 | -4.794574000 | 3.814896000 | 3.033506000  |
| 6 | -5.708187000 | 4.371550000 | 1.364579000  | 6 | -6.266939000 | 3.472356000 | 1.503989000  |
| 1 | -5.877504000 | 4.196928000 | 0.299986000  | 1 | -6.344923000 | 3.456572000 | 0.414953000  |

|   |              |             |             |   |              |             |             |
|---|--------------|-------------|-------------|---|--------------|-------------|-------------|
| 1 | -6.209751000 | 5.305845000 | 1.636610000 | 1 | -6.888406000 | 4.294002000 | 1.874452000 |
| 1 | -6.193864000 | 3.566798000 | 1.924279000 | 1 | -6.693353000 | 2.541831000 | 1.890379000 |

**Table S12.** Cartesian coordinates for the optimized geometries of **2-Ce<sup>Rb</sup>** and **2-Ce<sup>K18c6</sup>**.

| <b>2-Ce<sup>Rb</sup></b> |              |              |              | <b>2-Ce<sup>K18c6</sup></b> |              |             |              |
|--------------------------|--------------|--------------|--------------|-----------------------------|--------------|-------------|--------------|
| 58                       | -0.220951000 | 0.030364000  | 0.015016000  | 58                          | -3.402939000 | 0.092382000 | -0.070130000 |
| 15                       | 2.184160000  | 0.619259000  | 3.047957000  | 15                          | -5.767906000 | 2.995839000 | -0.751544000 |
| 15                       | 1.748797000  | -2.333603000 | -2.426072000 | 7                           | -4.631359000 | 2.053226000 | -0.317552000 |
| 15                       | -0.915307000 | 3.504715000  | -1.517684000 | 7                           | -6.682023000 | 2.685737000 | -2.164645000 |
| 15                       | -3.520249000 | -1.711218000 | 0.922824000  | 7                           | -7.233235000 | 3.131403000 | 0.181475000  |
| 7                        | 1.335773000  | 0.162443000  | 1.846698000  | 7                           | -5.269901000 | 4.611963000 | -0.959354000 |
| 7                        | 1.157716000  | -1.337075000 | -1.414725000 | 6                           | -8.233466000 | 2.270517000 | -0.423872000 |
| 7                        | -0.622507000 | 2.105764000  | -0.928459000 | 1                           | -9.240404000 | 2.538887000 | -0.090564000 |
| 7                        | -2.206971000 | -0.963959000 | 0.601824000  | 1                           | -8.070741000 | 1.206567000 | -0.191490000 |
| 7                        | 3.695349000  | 1.392708000  | 2.668402000  | 6                           | -8.093117000 | 2.492180000 | -1.919650000 |
| 7                        | 3.030548000  | -0.525439000 | 4.054328000  | 1                           | -8.485164000 | 1.626103000 | -2.465461000 |
| 7                        | 1.358815000  | 1.564442000  | 4.184598000  | 1                           | -8.682588000 | 3.372033000 | -2.229310000 |
| 7                        | 1.975638000  | -4.006244000 | -2.031529000 | 6                           | -7.209286000 | 3.190502000 | 1.655489000  |
| 7                        | 3.485772000  | -2.157735000 | -2.725575000 | 6                           | -6.070784000 | 4.097469000 | 2.116666000  |
| 7                        | 0.929655000  | -2.408947000 | -3.913275000 | 1                           | -5.104413000 | 3.691179000 | 1.813944000  |
| 7                        | 0.359606000  | 4.487512000  | -2.102451000 | 1                           | -6.082687000 | 4.167977000 | 3.209001000  |
| 7                        | -1.467564000 | 4.810484000  | -0.512146000 | 1                           | -6.168282000 | 5.104471000 | 1.708216000  |
| 7                        | -2.019287000 | 3.476410000  | -2.807868000 | 6                           | -7.015539000 | 1.812391000 | 2.296805000  |
| 7                        | -3.496846000 | -3.178412000 | 1.799446000  | 1                           | -7.831684000 | 1.128500000 | 2.050903000  |
| 7                        | -4.451550000 | -2.457953000 | -0.338766000 | 1                           | -6.984191000 | 1.901748000 | 3.388224000  |
| 7                        | -4.646120000 | -0.761126000 | 1.766759000  | 1                           | -6.076616000 | 1.368617000 | 1.958673000  |
| 6                        | 4.805255000  | 0.906368000  | 3.456189000  | 6                           | -8.528451000 | 3.799023000 | 2.142904000  |
| 1                        | 4.965295000  | 1.491560000  | 4.375231000  | 1                           | -8.710583000 | 4.761393000 | 1.656034000  |
| 1                        | 5.745803000  | 0.941251000  | 2.891632000  | 1                           | -8.490454000 | 3.960765000 | 3.224743000  |
| 6                        | 4.452972000  | -0.522435000 | 3.817125000  | 1                           | -9.385240000 | 3.148674000 | 1.945542000  |
| 1                        | 4.764306000  | -1.209913000 | 3.003336000  | 6                           | -6.142771000 | 2.381015000 | -3.495240000 |
| 1                        | 5.007578000  | -0.835205000 | 4.706118000  | 6                           | -4.725981000 | 2.933473000 | -3.647389000 |
| 6                        | 2.421958000  | -1.797610000 | 4.490118000  | 1                           | -4.718484000 | 4.021635000 | -3.556776000 |
| 6                        | 0.979233000  | -1.553553000 | 4.917247000  | 1                           | -4.341012000 | 2.665628000 | -4.636065000 |
| 1                        | 0.933127000  | -0.830840000 | 5.734628000  | 1                           | -4.051876000 | 2.522541000 | -2.892312000 |
| 1                        | 0.535446000  | -2.491989000 | 5.261143000  | 6                           | -7.023022000 | 3.044038000 | -4.561092000 |
| 1                        | 0.378122000  | -1.184248000 | 4.084759000  | 1                           | -8.044901000 | 2.653987000 | -4.553599000 |
| 6                        | 3.189609000  | -2.340082000 | 5.698684000  | 1                           | -6.610393000 | 2.859460000 | -5.557758000 |
| 1                        | 3.278684000  | -1.574424000 | 6.474694000  | 1                           | -7.069819000 | 4.126036000 | -4.405892000 |
| 1                        | 4.193271000  | -2.689729000 | 5.440274000  | 6                           | -6.114885000 | 0.867075000 | -3.723277000 |
| 1                        | 2.653210000  | -3.193335000 | 6.122565000  | 1                           | -5.499424000 | 0.379358000 | -2.963679000 |
| 6                        | 2.434047000  | -2.837527000 | 3.365101000  | 1                           | -5.709857000 | 0.623862000 | -4.710913000 |

|   |              |              |              |    |               |              |              |
|---|--------------|--------------|--------------|----|---------------|--------------|--------------|
| 1 | 1.839904000  | -2.471570000 | 2.525715000  | 1  | -7.118080000  | 0.434308000  | -3.665792000 |
| 1 | 2.001049000  | -3.785472000 | 3.697390000  | 6  | -3.991143000  | 5.066143000  | -0.458244000 |
| 1 | 3.454884000  | -3.056176000 | 3.028205000  | 1  | -3.438853000  | 4.168503000  | -0.171417000 |
| 6 | 3.865924000  | 2.697662000  | 1.996154000  | 1  | -4.115619000  | 5.665845000  | 0.459357000  |
| 6 | 4.672025000  | 2.484236000  | 0.708376000  | 6  | -3.183599000  | 5.874835000  | -1.464762000 |
| 1 | 5.610586000  | 1.953576000  | 0.903030000  | 1  | -3.683788000  | 6.805328000  | -1.752173000 |
| 1 | 4.929503000  | 3.437685000  | 0.237608000  | 1  | -2.996348000  | 5.298332000  | -2.375001000 |
| 1 | 4.086449000  | 1.917531000  | -0.020802000 | 1  | -2.217433000  | 6.149902000  | -1.030952000 |
| 6 | 4.628785000  | 3.680450000  | 2.893141000  | 6  | -6.162044000  | 5.598692000  | -1.532042000 |
| 1 | 4.132768000  | 3.798930000  | 3.859225000  | 1  | -7.046547000  | 5.072736000  | -1.894094000 |
| 1 | 4.670286000  | 4.663026000  | 2.415101000  | 1  | -5.694724000  | 6.043335000  | -2.425037000 |
| 1 | 5.660036000  | 3.365840000  | 3.077463000  | 6  | -6.595892000  | 6.716366000  | -0.592075000 |
| 6 | 2.522434000  | 3.326035000  | 1.633175000  | 1  | -7.189378000  | 6.319685000  | 0.234272000  |
| 1 | 1.908512000  | 2.671388000  | 1.012604000  | 1  | -7.211562000  | 7.444775000  | -1.130652000 |
| 1 | 2.699551000  | 4.250328000  | 1.076352000  | 1  | -5.742920000  | 7.257555000  | -0.170592000 |
| 1 | 1.946828000  | 3.572748000  | 2.527202000  | 15 | -5.283526000  | -3.187171000 | -0.879703000 |
| 6 | -0.020911000 | 1.960694000  | 3.965663000  | 7  | -4.614433000  | -1.810805000 | -0.721542000 |
| 1 | -0.322749000 | 1.516894000  | 3.016244000  | 7  | -4.625415000  | -4.611951000 | -0.123732000 |
| 1 | -0.082145000 | 3.049714000  | 3.832941000  | 7  | -6.816266000  | -3.515123000 | -0.172490000 |
| 6 | -0.990470000 | 1.536865000  | 5.060020000  | 7  | -5.484572000  | -3.673947000 | -2.505153000 |
| 1 | -1.991601000 | 1.905902000  | 4.821375000  | 6  | -6.780045000  | -4.558397000 | 0.830559000  |
| 1 | -0.722067000 | 1.943438000  | 6.040074000  | 1  | -7.260847000  | -5.479883000 | 0.464144000  |
| 1 | -1.048218000 | 0.450563000  | 5.150475000  | 1  | -7.301293000  | -4.259676000 | 1.747545000  |
| 6 | 1.971433000  | 1.971115000  | 5.436027000  | 6  | -5.313736000  | -4.814076000 | 1.136033000  |
| 1 | 3.024782000  | 1.689716000  | 5.406369000  | 1  | -4.969641000  | -4.117831000 | 1.917110000  |
| 1 | 1.542887000  | 1.399110000  | 6.274080000  | 1  | -5.171721000  | -5.833556000 | 1.508217000  |
| 6 | 1.847734000  | 3.458229000  | 5.741338000  | 6  | -7.956278000  | -2.586289000 | -0.174615000 |
| 1 | 2.246408000  | 4.071655000  | 4.929386000  | 6  | -7.980797000  | -1.780578000 | -1.472028000 |
| 1 | 2.402346000  | 3.700923000  | 6.652905000  | 1  | -7.071376000  | -1.185992000 | -1.579286000 |
| 1 | 0.810194000  | 3.761911000  | 5.902700000  | 1  | -8.837965000  | -1.099518000 | -1.460294000 |
| 6 | 3.369814000  | -4.368096000 | -1.921001000 | 1  | -8.069842000  | -2.435621000 | -2.340547000 |
| 1 | 3.533529000  | -5.416263000 | -2.188729000 | 6  | -7.866225000  | -1.617255000 | 1.006814000  |
| 1 | 3.767335000  | -4.233738000 | -0.897102000 | 1  | -7.839068000  | -2.147639000 | 1.963279000  |
| 6 | 4.107433000  | -3.460991000 | -2.878677000 | 1  | -8.731240000  | -0.945429000 | 1.029582000  |
| 1 | 5.171990000  | -3.428435000 | -2.626214000 | 1  | -6.957952000  | -1.018042000 | 0.923566000  |
| 1 | 4.026599000  | -3.856330000 | -3.902681000 | 6  | -9.264232000  | -3.379636000 | -0.080789000 |
| 6 | 4.072324000  | -1.071872000 | -3.543798000 | 1  | -9.360818000  | -4.084835000 | -0.910447000 |
| 6 | 3.376380000  | 0.250487000  | -3.243978000 | 1  | -10.115939000 | -2.693812000 | -0.120603000 |
| 1 | 2.301367000  | 0.205267000  | -3.409954000 | 1  | -9.343610000  | -3.942147000 | 0.853705000  |
| 1 | 3.791326000  | 1.032492000  | -3.885342000 | 6  | -3.192942000  | -4.942686000 | -0.171856000 |
| 1 | 3.523209000  | 0.566879000  | -2.208594000 | 6  | -2.624656000  | -4.581954000 | -1.542458000 |
| 6 | 3.983242000  | -1.341544000 | -5.051188000 | 1  | -3.159785000  | -5.100471000 | -2.341421000 |
| 1 | 4.469549000  | -2.280664000 | -5.328762000 | 1  | -1.572890000  | -4.879982000 | -1.588984000 |

|   |              |              |              |    |              |              |              |
|---|--------------|--------------|--------------|----|--------------|--------------|--------------|
| 1 | 4.481989000  | -0.542716000 | -5.608480000 | 1  | -2.682651000 | -3.506947000 | -1.723632000 |
| 1 | 2.944743000  | -1.382209000 | -5.377244000 | 6  | -3.029386000 | -6.455648000 | 0.017625000  |
| 6 | 5.553929000  | -0.913308000 | -3.175581000 | 1  | -3.353402000 | -6.788364000 | 1.007710000  |
| 1 | 5.686612000  | -0.804483000 | -2.093364000 | 1  | -1.976573000 | -6.737192000 | -0.088542000 |
| 1 | 5.960514000  | -0.015574000 | -3.648952000 | 1  | -3.608759000 | -7.000920000 | -0.732677000 |
| 1 | 6.165196000  | -1.756181000 | -3.507426000 | 6  | -2.393083000 | -4.207952000 | 0.908748000  |
| 6 | 1.030917000  | -4.743300000 | -1.164204000 | 1  | -2.547191000 | -3.129038000 | 0.832999000  |
| 6 | -0.406277000 | -4.392430000 | -1.533341000 | 1  | -1.323197000 | -4.416921000 | 0.804112000  |
| 1 | -0.612825000 | -3.330565000 | -1.390916000 | 1  | -2.691657000 | -4.524148000 | 1.912373000  |
| 1 | -1.087851000 | -4.954329000 | -0.889269000 | 6  | -4.860971000 | -2.916830000 | -3.569207000 |
| 1 | -0.619614000 | -4.656867000 | -2.570541000 | 1  | -3.967220000 | -3.449434000 | -3.939839000 |
| 6 | 1.258898000  | -4.407325000 | 0.311263000  | 1  | -4.509252000 | -1.983342000 | -3.125967000 |
| 1 | 2.281014000  | -4.638390000 | 0.630028000  | 6  | -5.780035000 | -2.629589000 | -4.748164000 |
| 1 | 0.586945000  | -4.982929000 | 0.952600000  | 1  | -6.679366000 | -2.099769000 | -4.425297000 |
| 1 | 1.061913000  | -3.346583000 | 0.479225000  | 1  | -6.089037000 | -3.545909000 | -5.261018000 |
| 6 | 1.221726000  | -6.247110000 | -1.382738000 | 1  | -5.265881000 | -2.003744000 | -5.484617000 |
| 1 | 1.163063000  | -6.495356000 | -2.446592000 | 6  | -5.897040000 | -5.027561000 | -2.834412000 |
| 1 | 0.432938000  | -6.796870000 | -0.862151000 | 1  | -5.643951000 | -5.679939000 | -1.992615000 |
| 1 | 2.176457000  | -6.612696000 | -0.994233000 | 1  | -5.285666000 | -5.371697000 | -3.682800000 |
| 6 | -0.083681000 | -1.417536000 | -4.242937000 | 6  | -7.373638000 | -5.203233000 | -3.166596000 |
| 1 | -0.150690000 | -0.736669000 | -3.392319000 | 1  | -7.983637000 | -4.940427000 | -2.300991000 |
| 1 | -1.063467000 | -1.906026000 | -4.319193000 | 1  | -7.585102000 | -6.246932000 | -3.427292000 |
| 6 | 0.193499000  | -0.637066000 | -5.520742000 | 1  | -7.687772000 | -4.576233000 | -4.004480000 |
| 1 | 0.322708000  | -1.291414000 | -6.388648000 | 15 | -2.475436000 | 0.086335000  | 3.684653000  |
| 1 | 1.089742000  | -0.017894000 | -5.432675000 | 7  | -2.720242000 | -0.056612000 | 2.175360000  |
| 1 | -0.645926000 | 0.027404000  | -5.740945000 | 7  | -2.336218000 | 1.642536000  | 4.456711000  |
| 6 | 1.168802000  | -3.455002000 | -4.896799000 | 7  | -3.649278000 | -0.381773000 | 4.845650000  |
| 1 | 1.777913000  | -4.221197000 | -4.414203000 | 7  | -1.065523000 | -0.731301000 | 4.204332000  |
| 1 | 1.757211000  | -3.072957000 | -5.744542000 | 6  | -4.153338000 | 0.717053000  | 5.640859000  |
| 6 | -0.091453000 | -4.111342000 | -5.446353000 | 1  | -3.793062000 | 0.655461000  | 6.681107000  |
| 1 | 0.187040000  | -4.936041000 | -6.109292000 | 1  | -5.249276000 | 0.726744000  | 5.673591000  |
| 1 | -0.704226000 | -3.420118000 | -6.030386000 | 6  | -3.646467000 | 1.986784000  | 4.981635000  |
| 1 | -0.717284000 | -4.517454000 | -4.648698000 | 1  | -4.345078000 | 2.298119000  | 4.189906000  |
| 6 | 0.481047000  | 5.759929000  | -1.427890000 | 1  | -3.580515000 | 2.800036000  | 5.710729000  |
| 1 | 0.089894000  | 6.585552000  | -2.045163000 | 6  | -4.403121000 | -1.641195000 | 4.838997000  |
| 1 | 1.525459000  | 5.996093000  | -1.190928000 | 6  | -3.544614000 | -2.766143000 | 4.268761000  |
| 6 | -0.328897000 | 5.633754000  | -0.152207000 | 1  | -3.230770000 | -2.536736000 | 3.248815000  |
| 1 | 0.289083000  | 5.178519000  | 0.638486000  | 1  | -4.125088000 | -3.693782000 | 4.250142000  |
| 1 | -0.649050000 | 6.619056000  | 0.197615000  | 1  | -2.655297000 | -2.930326000 | 4.881661000  |
| 6 | -2.507484000 | 4.629580000  | 0.517854000  | 6  | -5.670270000 | -1.507982000 | 3.990451000  |
| 6 | -3.593885000 | 3.688861000  | 0.003083000  | 1  | -6.312349000 | -0.696922000 | 4.347356000  |
| 1 | -4.052674000 | 4.071967000  | -0.909379000 | 1  | -6.260078000 | -2.431056000 | 4.015815000  |
| 1 | -4.376140000 | 3.587973000  | 0.760357000  | 1  | -5.401181000 | -1.295541000 | 2.954213000  |



|   |              |              |              |    |              |              |              |
|---|--------------|--------------|--------------|----|--------------|--------------|--------------|
| 1 | -3.194755000 | 2.693550000  | -0.201607000 | 6  | -4.772098000 | -2.014912000 | 6.278544000  |
| 6 | -3.157677000 | 5.985684000  | 0.810336000  | 1  | -3.875895000 | -2.080056000 | 6.903202000  |
| 1 | -2.464661000 | 6.689678000  | 1.279244000  | 1  | -5.270451000 | -2.988885000 | 6.294394000  |
| 1 | -3.998620000 | 5.857277000  | 1.498508000  | 1  | -5.454387000 | -1.292728000 | 6.735192000  |
| 1 | -3.533789000 | 6.439195000  | -0.110707000 | 6  | -1.563590000 | 2.748664000  | 3.861735000  |
| 6 | -1.924242000 | 4.051427000  | 1.809264000  | 6  | -0.310085000 | 2.207717000  | 3.178617000  |
| 1 | -1.419973000 | 3.107770000  | 1.594412000  | 1  | 0.308576000  | 1.638217000  | 3.875192000  |
| 1 | -2.711952000 | 3.871278000  | 2.547375000  | 1  | 0.278830000  | 3.047221000  | 2.796765000  |
| 1 | -1.199267000 | 4.731725000  | 2.266248000  | 1  | -0.569615000 | 1.561736000  | 2.337900000  |
| 6 | 1.389756000  | 4.107456000  | -3.073993000 | 6  | -1.117603000 | 3.687846000  | 4.988460000  |
| 6 | 0.916205000  | 2.941992000  | -3.939085000 | 1  | -1.965061000 | 4.156789000  | 5.495835000  |
| 1 | 0.639986000  | 2.081134000  | -3.326241000 | 1  | -0.497186000 | 4.495507000  | 4.586039000  |
| 1 | 1.720836000  | 2.643902000  | -4.617713000 | 1  | -0.535652000 | 3.141253000  | 5.736159000  |
| 1 | 0.050065000  | 3.225918000  | -4.539072000 | 6  | -2.378122000 | 3.538134000  | 2.832269000  |
| 6 | 2.667425000  | 3.697079000  | -2.334695000 | 1  | -2.778518000 | 2.873892000  | 2.062429000  |
| 1 | 3.036609000  | 4.507012000  | -1.698069000 | 1  | -1.753321000 | 4.294325000  | 2.346117000  |
| 1 | 3.469429000  | 3.436326000  | -3.033292000 | 1  | -3.215906000 | 4.064436000  | 3.297425000  |
| 1 | 2.457063000  | 2.835093000  | -1.698881000 | 6  | -0.150673000 | -1.280481000 | 3.233492000  |
| 6 | 1.688542000  | 5.291129000  | -4.000883000 | 1  | 0.798728000  | -0.714903000 | 3.228950000  |
| 1 | 0.780344000  | 5.621344000  | -4.512942000 | 1  | -0.614584000 | -1.116465000 | 2.257328000  |
| 1 | 2.417854000  | 4.996424000  | -4.761430000 | 6  | 0.153093000  | -2.762621000 | 3.418101000  |
| 1 | 2.106269000  | 6.146329000  | -3.462392000 | 1  | 0.662686000  | -2.974853000 | 4.365025000  |
| 6 | -2.842606000 | 2.313108000  | -3.063115000 | 1  | 0.799280000  | -3.118750000 | 2.607605000  |
| 1 | -3.875928000 | 2.478216000  | -2.719426000 | 1  | -0.762812000 | -3.355892000 | 3.389937000  |
| 1 | -2.438828000 | 1.508101000  | -2.445973000 | 6  | -0.749847000 | -0.879571000 | 5.606888000  |
| 6 | -2.869042000 | 1.883637000  | -4.522810000 | 1  | -0.743238000 | -1.946925000 | 5.883290000  |
| 1 | -3.357262000 | 2.619554000  | -5.169164000 | 1  | -1.566113000 | -0.431426000 | 6.175399000  |
| 1 | -3.423445000 | 0.945838000  | -4.626245000 | 6  | 0.567576000  | -0.251125000 | 6.045920000  |
| 1 | -1.856920000 | 1.722703000  | -4.901977000 | 1  | 0.743031000  | -0.442248000 | 7.109894000  |
| 6 | -2.275727000 | 4.665447000  | -3.598138000 | 1  | 1.422678000  | -0.660356000 | 5.496065000  |
| 1 | -2.077073000 | 4.446550000  | -4.658661000 | 1  | 0.552993000  | 0.830859000  | 5.895809000  |
| 1 | -1.542410000 | 5.419805000  | -3.309266000 | 15 | -0.228734000 | 0.420400000  | -2.318244000 |
| 6 | -3.674642000 | 5.252508000  | -3.467029000 | 7  | -1.440802000 | 0.230724000  | -1.399758000 |
| 1 | -4.454065000 | 4.527430000  | -3.720094000 | 7  | -0.344946000 | 0.355634000  | -4.029825000 |
| 1 | -3.789691000 | 6.104446000  | -4.145017000 | 7  | 0.598493000  | 1.958636000  | -2.436526000 |
| 1 | -3.855338000 | 5.605870000  | -2.449872000 | 7  | 1.040514000  | -0.679334000 | -1.981736000 |
| 6 | -4.657118000 | -1.802778000 | -1.644861000 | 6  | 0.069094000  | 2.649459000  | -3.600063000 |
| 6 | -4.925649000 | -0.313099000 | -1.440779000 | 1  | 0.719653000  | 3.475794000  | -3.901949000 |
| 1 | -5.798271000 | -0.149871000 | -0.806421000 | 1  | -0.939128000 | 3.057617000  | -3.425743000 |
| 1 | -5.115183000 | 0.158958000  | -2.408977000 | 6  | 0.009398000  | 1.593487000  | -4.687293000 |
| 1 | -4.068626000 | 0.186709000  | -0.985242000 | 1  | -0.729283000 | 1.878628000  | -5.444823000 |
| 6 | -5.889484000 | -2.416036000 | -2.317282000 | 1  | 0.986090000  | 1.513777000  | -5.194949000 |
| 1 | -5.734275000 | -3.460362000 | -2.601946000 | 6  | 0.821006000  | 2.784849000  | -1.235477000 |

|    |              |              |              |    |              |              |              |
|----|--------------|--------------|--------------|----|--------------|--------------|--------------|
| 1  | -6.129181000 | -1.866187000 | -3.232313000 | 6  | 1.327527000  | 1.904836000  | -0.095392000 |
| 1  | -6.755218000 | -2.367932000 | -1.650902000 | 1  | 1.540149000  | 2.530949000  | 0.776146000  |
| 6  | -3.442161000 | -1.963135000 | -2.565383000 | 1  | 0.575647000  | 1.168368000  | 0.195119000  |
| 1  | -2.551168000 | -1.558191000 | -2.081377000 | 1  | 2.243219000  | 1.382242000  | -0.378280000 |
| 1  | -3.602147000 | -1.432033000 | -3.509204000 | 6  | -0.448026000 | 3.509776000  | -0.779925000 |
| 1  | -3.251295000 | -3.012366000 | -2.810323000 | 1  | -0.264845000 | 4.068508000  | 0.143656000  |
| 6  | -4.174577000 | -3.881534000 | -0.359501000 | 1  | -0.792787000 | 4.225170000  | -1.530188000 |
| 1  | -4.976487000 | -4.431466000 | -0.860250000 | 1  | -1.250298000 | 2.791117000  | -0.602376000 |
| 1  | -3.231830000 | -4.118264000 | -0.875411000 | 6  | 1.910639000  | 3.816274000  | -1.550708000 |
| 6  | -4.082639000 | -4.296945000 | 1.098123000  | 1  | 2.187617000  | 4.360954000  | -0.641995000 |
| 1  | -3.470330000 | -5.202115000 | 1.193311000  | 1  | 2.800768000  | 3.317551000  | -1.947663000 |
| 1  | -5.085416000 | -4.539848000 | 1.487187000  | 1  | 1.582406000  | 4.559496000  | -2.282193000 |
| 6  | -2.856486000 | -3.412986000 | 3.099148000  | 6  | -1.082756000 | -0.655381000 | -4.797017000 |
| 6  | -1.487040000 | -4.065902000 | 2.888096000  | 6  | -1.085840000 | -1.986190000 | -4.050817000 |
| 1  | -1.577023000 | -5.004806000 | 2.332233000  | 1  | -1.657469000 | -2.724748000 | -4.619724000 |
| 1  | -1.002526000 | -4.293960000 | 3.843807000  | 1  | -0.068103000 | -2.362746000 | -3.922332000 |
| 1  | -0.843111000 | -3.392348000 | 2.319681000  | 1  | -1.546723000 | -1.883028000 | -3.066650000 |
| 6  | -2.666742000 | -2.101699000 | 3.858308000  | 6  | -0.386314000 | -0.871279000 | -6.144936000 |
| 1  | -2.086719000 | -1.385483000 | 3.272036000  | 1  | -0.890088000 | -1.666091000 | -6.703146000 |
| 1  | -2.132316000 | -2.299112000 | 4.792208000  | 1  | -0.401010000 | 0.026126000  | -6.770037000 |
| 1  | -3.627624000 | -1.646035000 | 4.102523000  | 1  | 0.657075000  | -1.166607000 | -5.996439000 |
| 6  | -3.739702000 | -4.329011000 | 3.953282000  | 6  | -2.528301000 | -0.203496000 | -5.023569000 |
| 1  | -4.735390000 | -3.896010000 | 4.085066000  | 1  | -3.085709000 | -0.941697000 | -5.608962000 |
| 1  | -3.293984000 | -4.459626000 | 4.943845000  | 1  | -3.028794000 | -0.068007000 | -4.063202000 |
| 1  | -3.855544000 | -5.323827000 | 3.514095000  | 1  | -2.571716000 | 0.746673000  | -5.565336000 |
| 6  | -4.672209000 | 1.214984000  | 3.282729000  | 6  | 0.984731000  | -1.507190000 | -0.800829000 |
| 1  | -5.689859000 | 1.072904000  | 3.659492000  | 1  | 0.006869000  | -1.323015000 | -0.348585000 |
| 1  | -4.472991000 | 2.290932000  | 3.297692000  | 1  | 1.739116000  | -1.182564000 | -0.061573000 |
| 1  | -3.983846000 | 0.733872000  | 3.982018000  | 6  | 1.158060000  | -2.996992000 | -1.063569000 |
| 6  | -4.490846000 | 0.674099000  | 1.871316000  | 1  | 1.066570000  | -3.555928000 | -0.126237000 |
| 1  | -5.187848000 | 1.194415000  | 1.195464000  | 1  | 0.391252000  | -3.364924000 | -1.748361000 |
| 1  | -3.485413000 | 0.901913000  | 1.511978000  | 1  | 2.138288000  | -3.235365000 | -1.492362000 |
| 6  | -5.869320000 | -1.343109000 | 2.284676000  | 6  | 2.192556000  | -0.793106000 | -2.842805000 |
| 1  | -5.926512000 | -1.167138000 | 3.369929000  | 1  | 2.221498000  | -1.789850000 | -3.315967000 |
| 1  | -5.799861000 | -2.425204000 | 2.164512000  | 1  | 2.066675000  | -0.080872000 | -3.659616000 |
| 6  | -7.154481000 | -0.851357000 | 1.632591000  | 6  | 3.530156000  | -0.537641000 | -2.156193000 |
| 1  | -7.184069000 | -1.126609000 | 0.576297000  | 1  | 4.358436000  | -0.666522000 | -2.861765000 |
| 1  | -7.267146000 | 0.234523000  | 1.705738000  | 1  | 3.574009000  | 0.481616000  | -1.763925000 |
| 1  | -8.022652000 | -1.303002000 | 2.123516000  | 1  | 3.690408000  | -1.229331000 | -1.321393000 |
| 37 | 3.523549000  | -1.081000000 | 0.294939000  | 19 | 6.319645000  | -0.647496000 | 0.135156000  |
|    |              |              |              | 8  | 10.519186000 | -2.000637000 | -0.264024000 |
|    |              |              |              | 8  | 8.236998000  | -2.155475000 | 1.591852000  |
|    |              |              |              | 8  | 8.135997000  | 0.505773000  | 2.394219000  |

|   |              |              |              |
|---|--------------|--------------|--------------|
| 8 | 11.641101000 | 0.534143000  | -1.229219000 |
| 6 | 11.522879000 | 2.882915000  | -1.573512000 |
| 1 | 12.070767000 | 2.993717000  | -0.628199000 |
| 1 | 11.856864000 | 3.683866000  | -2.251763000 |
| 8 | 10.133575000 | 2.951692000  | -1.379719000 |
| 6 | 8.967888000  | -3.247661000 | 1.076982000  |
| 1 | 8.451112000  | -3.535049000 | 0.159415000  |
| 1 | 8.928167000  | -4.097286000 | 1.775883000  |
| 6 | 8.511403000  | -1.843507000 | 2.938617000  |
| 1 | 9.592748000  | -1.765692000 | 3.106443000  |
| 1 | 8.138462000  | -2.637896000 | 3.604091000  |
| 6 | 9.900304000  | 4.152323000  | 0.772707000  |
| 1 | 10.973972000 | 4.125610000  | 1.016237000  |
| 1 | 9.513126000  | 5.107039000  | 1.143567000  |
| 6 | 10.418848000 | -2.953390000 | 0.764791000  |
| 1 | 10.961910000 | -2.603223000 | 1.656175000  |
| 1 | 10.893436000 | -3.900527000 | 0.458622000  |
| 6 | 9.680594000  | 4.119129000  | -0.730742000 |
| 1 | 8.607749000  | 4.163011000  | -0.928985000 |
| 1 | 10.143315000 | 5.014013000  | -1.178708000 |
| 6 | 11.861473000 | -1.760344000 | -0.612157000 |
| 1 | 12.335659000 | -2.694572000 | -0.952919000 |
| 1 | 12.425394000 | -1.400555000 | 0.261438000  |
| 6 | 11.962823000 | -0.742278000 | -1.716078000 |
| 1 | 12.996341000 | -0.754755000 | -2.097747000 |
| 1 | 11.300071000 | -1.021668000 | -2.549396000 |
| 6 | 11.864276000 | 1.547405000  | -2.178477000 |
| 1 | 11.251209000 | 1.380419000  | -3.076973000 |
| 1 | 12.920636000 | 1.553732000  | -2.490296000 |
| 6 | 7.811786000  | -0.541894000 | 3.280737000  |
| 1 | 6.729668000  | -0.673465000 | 3.207692000  |
| 1 | 8.048703000  | -0.268756000 | 4.319961000  |
| 6 | 9.866725000  | 1.888745000  | 1.446216000  |
| 1 | 10.954018000 | 2.034412000  | 1.537611000  |
| 1 | 9.685775000  | 1.372650000  | 0.499992000  |
| 8 | 9.224029000  | 3.146803000  | 1.484394000  |
| 6 | 9.431549000  | 1.029622000  | 2.600420000  |
| 1 | 10.163180000 | 0.215094000  | 2.686030000  |
| 1 | 9.456550000  | 1.609275000  | 3.534440000  |
| 8 | 4.514673000  | -0.669589000 | 2.366207000  |
| 8 | 4.748894000  | -2.986244000 | 0.759665000  |
| 8 | 6.586489000  | -3.163492000 | -1.379664000 |
| 8 | 7.289354000  | -0.688734000 | -2.548041000 |

|  |   |             |              |              |
|--|---|-------------|--------------|--------------|
|  | 8 | 6.880785000 | 1.748079000  | -1.195365000 |
|  | 8 | 5.050517000 | 1.707874000  | 0.958866000  |
|  | 6 | 3.667640000 | -1.790684000 | 2.508513000  |
|  | 1 | 2.784472000 | -1.676029000 | 1.868520000  |
|  | 1 | 3.318500000 | -1.879186000 | 3.547316000  |
|  | 6 | 4.403635000 | -3.042831000 | 2.126489000  |
|  | 1 | 5.309856000 | -3.169374000 | 2.738488000  |
|  | 1 | 3.744079000 | -3.901241000 | 2.317839000  |
|  | 6 | 5.230750000 | -4.214194000 | 0.273075000  |
|  | 1 | 4.473967000 | -5.000887000 | 0.407145000  |
|  | 1 | 6.133629000 | -4.517364000 | 0.824165000  |
|  | 6 | 5.535576000 | -4.087197000 | -1.193720000 |
|  | 1 | 5.820361000 | -5.074944000 | -1.586115000 |
|  | 1 | 4.639489000 | -3.752719000 | -1.733626000 |
|  | 6 | 6.943581000 | -3.019780000 | -2.736868000 |
|  | 1 | 6.052618000 | -2.798846000 | -3.340212000 |
|  | 1 | 7.388490000 | -3.952656000 | -3.114795000 |
|  | 6 | 7.934807000 | -1.896795000 | -2.875177000 |
|  | 1 | 8.801744000 | -2.061602000 | -2.220339000 |
|  | 1 | 8.289315000 | -1.869298000 | -3.917154000 |
|  | 6 | 8.085085000 | 0.455122000  | -2.776191000 |
|  | 1 | 8.449934000 | 0.459593000  | -3.814734000 |
|  | 1 | 8.952771000 | 0.468203000  | -2.103310000 |
|  | 6 | 7.242436000 | 1.680090000  | -2.554820000 |
|  | 1 | 7.825329000 | 2.567290000  | -2.838334000 |
|  | 1 | 6.344351000 | 1.633267000  | -3.186703000 |
|  | 6 | 5.990239000 | 2.806927000  | -0.916925000 |
|  | 1 | 5.042052000 | 2.658034000  | -1.450408000 |
|  | 1 | 6.417516000 | 3.763873000  | -1.252358000 |
|  | 6 | 5.747809000 | 2.869763000  | 0.564972000  |
|  | 1 | 6.704226000 | 2.945199000  | 1.099134000  |
|  | 1 | 5.145438000 | 3.762837000  | 0.787237000  |
|  | 6 | 4.720115000 | 1.709890000  | 2.329106000  |
|  | 1 | 4.179188000 | 2.630963000  | 2.590104000  |
|  | 1 | 5.635407000 | 1.669355000  | 2.936343000  |
|  | 6 | 3.821004000 | 0.540985000  | 2.616971000  |
|  | 1 | 3.494851000 | 0.580052000  | 3.666097000  |
|  | 1 | 2.927958000 | 0.596441000  | 1.982942000  |

**Table S13.** Cartesian coordinates for the optimized geometries of **2-Ce<sup>Cs</sup> (1)** and **2-Ce<sup>Cs</sup> (2)**.

| 2-Ce <sup>Cs</sup> (1) |              |             |             | 2-Ce <sup>Cs</sup> (2) |             |             |             |
|------------------------|--------------|-------------|-------------|------------------------|-------------|-------------|-------------|
| 58                     | -0.268438000 | 0.025801000 | 0.020715000 | 58                     | 0.271143000 | 0.003455000 | 0.000699000 |

|    |              |              |              |    |              |              |              |
|----|--------------|--------------|--------------|----|--------------|--------------|--------------|
| 15 | -3.431585000 | -1.607574000 | 1.468011000  | 15 | 2.441663000  | 3.128353000  | -0.617248000 |
| 15 | -1.197139000 | 3.008828000  | -2.240391000 | 15 | 2.521709000  | -3.070617000 | 0.619442000  |
| 15 | 1.648994000  | -2.710103000 | -2.028114000 | 15 | -2.032331000 | -0.899053000 | -3.020895000 |
| 15 | 2.139620000  | 1.437603000  | 2.767775000  | 15 | -2.057539000 | 0.850695000  | 3.019216000  |
| 7  | -0.881223000 | 1.755128000  | -1.394184000 | 7  | 1.568316000  | 1.865133000  | -0.452482000 |
| 7  | 1.114336000  | -1.547193000 | -1.174994000 | 7  | 1.619035000  | -1.827666000 | 0.453588000  |
| 7  | 1.340897000  | 0.698337000  | 1.678239000  | 7  | -1.316772000 | -0.472746000 | -1.730032000 |
| 7  | -2.135285000 | -0.906965000 | 1.001984000  | 7  | -1.328726000 | 0.442657000  | 1.729887000  |
| 55 | 3.696258000  | -0.938267000 | 0.430182000  | 55 | -3.890178000 | -0.041224000 | -0.003474000 |
| 7  | 0.739024000  | -3.045206000 | -3.425856000 | 7  | 3.669513000  | 2.948245000  | -1.779669000 |
| 6  | -0.290741000 | -2.118313000 | -3.870977000 | 6  | 4.055468000  | 1.639777000  | -2.263369000 |
| 1  | -0.316941000 | -1.299764000 | -3.148873000 | 1  | 3.274902000  | 0.948924000  | -1.938658000 |
| 1  | -1.271288000 | -2.607385000 | -3.814760000 | 1  | 4.988357000  | 1.301679000  | -1.785327000 |
| 6  | -0.084083000 | -1.568956000 | -5.276296000 | 6  | 4.220430000  | 1.564145000  | -3.774606000 |
| 1  | 0.813501000  | -0.949413000 | -5.343930000 | 1  | 4.419080000  | 0.531646000  | -4.077927000 |
| 1  | -0.935499000 | -0.943945000 | -5.559628000 | 1  | 5.054961000  | 2.171800000  | -4.137903000 |
| 1  | -0.000825000 | -2.362485000 | -6.025752000 | 1  | 3.314577000  | 1.898270000  | -4.286819000 |
| 6  | 0.922694000  | -4.252838000 | -4.217616000 | 6  | 4.490834000  | 4.075552000  | -2.177031000 |
| 1  | 1.543205000  | -4.932974000 | -3.631269000 | 1  | 4.036500000  | 4.978920000  | -1.767808000 |
| 1  | 1.477991000  | -4.039473000 | -5.143350000 | 1  | 4.446274000  | 4.189403000  | -3.271059000 |
| 6  | -0.367688000 | -4.971350000 | -4.592523000 | 6  | 5.949044000  | 4.012472000  | -1.742377000 |
| 1  | -0.991313000 | -4.386068000 | -5.272923000 | 1  | 6.451530000  | 3.111304000  | -2.106623000 |
| 1  | -0.970745000 | -5.211009000 | -3.714105000 | 1  | 6.029787000  | 4.031826000  | -0.653725000 |
| 1  | -0.126136000 | -5.909218000 | -5.101699000 | 1  | 6.497524000  | 4.873852000  | -2.137371000 |
| 7  | -2.243000000 | 2.702765000  | -3.551755000 | 7  | 3.743395000  | -2.861952000 | 1.783301000  |
| 6  | -2.594352000 | 1.339219000  | -3.893999000 | 6  | 4.097132000  | -1.544842000 | 2.268328000  |
| 1  | -2.370035000 | 0.724642000  | -3.020017000 | 1  | 3.301889000  | -0.872361000 | 1.940795000  |
| 1  | -1.948097000 | 0.974623000  | -4.711795000 | 1  | 5.023536000  | -1.185273000 | 1.793386000  |
| 6  | -4.046253000 | 1.157907000  | -4.310602000 | 6  | 4.254916000  | -1.465211000 | 3.780121000  |
| 1  | -4.283481000 | 1.707723000  | -5.226272000 | 1  | 3.354762000  | -1.819018000 | 4.289167000  |
| 1  | -4.729469000 | 1.493287000  | -3.526526000 | 1  | 4.429647000  | -0.428480000 | 4.083759000  |
| 1  | -4.247401000 | 0.100232000  | -4.510108000 | 1  | 5.101321000  | -2.054185000 | 4.146695000  |
| 6  | -2.405481000 | 3.689297000  | -4.608459000 | 6  | 4.590142000  | -3.969767000 | 2.182151000  |
| 1  | -2.359321000 | 3.164739000  | -5.574602000 | 1  | 4.158530000  | -4.883364000 | 1.771014000  |
| 1  | -1.543397000 | 4.363043000  | -4.592321000 | 1  | 4.545403000  | -4.085490000 | 3.275977000  |
| 6  | -3.676412000 | 4.525590000  | -4.539347000 | 6  | 6.047585000  | -3.871664000 | 1.751463000  |
| 1  | -3.724015000 | 5.214306000  | -5.390438000 | 1  | 6.615251000  | -4.720219000 | 2.147091000  |
| 1  | -3.682566000 | 5.118446000  | -3.623374000 | 1  | 6.527608000  | -2.959247000 | 2.117965000  |
| 1  | -4.578682000 | 3.909829000  | -4.555303000 | 1  | 6.131782000  | -3.887945000 | 0.663012000  |
| 7  | -4.593991000 | -0.538618000 | 2.093083000  | 7  | -1.046490000 | -0.929087000 | -4.407058000 |
| 6  | -4.435523000 | 0.896626000  | 1.989108000  | 6  | 0.267900000  | -0.304251000 | -4.387238000 |
| 1  | -5.090326000 | 1.304504000  | 1.203063000  | 1  | 1.042558000  | -1.072864000 | -4.502470000 |
| 1  | -3.411574000 | 1.072924000  | 1.653508000  | 1  | 0.407431000  | 0.116141000  | -3.389491000 |

|   |              |              |              |   |              |              |              |
|---|--------------|--------------|--------------|---|--------------|--------------|--------------|
| 6 | -4.701570000 | 1.643858000  | 3.289339000  | 6 | 0.468230000  | 0.774980000  | -5.442540000 |
| 1 | -4.530186000 | 2.714969000  | 3.146096000  | 1 | 0.321088000  | 0.396795000  | -6.459069000 |
| 1 | -4.042618000 | 1.301086000  | 4.090266000  | 1 | 1.488561000  | 1.162951000  | -5.386849000 |
| 1 | -5.734525000 | 1.530363000  | 3.632434000  | 1 | -0.212443000 | 1.617410000  | -5.298374000 |
| 6 | -5.840475000 | -1.035554000 | 2.644761000  | 6 | -1.445925000 | -1.567707000 | -5.651395000 |
| 1 | -5.914948000 | -0.748750000 | 3.705611000  | 1 | -1.721610000 | -0.818857000 | -6.409989000 |
| 1 | -5.791236000 | -2.125181000 | 2.643083000  | 1 | -2.345556000 | -2.149515000 | -5.445256000 |
| 6 | -7.100435000 | -0.576140000 | 1.922970000  | 6 | -0.397312000 | -2.497379000 | -6.249389000 |
| 1 | -7.199981000 | 0.513290000  | 1.912671000  | 1 | -0.090610000 | -3.266549000 | -5.536900000 |
| 1 | -7.986671000 | -0.978940000 | 2.423832000  | 1 | 0.501385000  | -1.965480000 | -6.571351000 |
| 1 | -7.114867000 | -0.922658000 | 0.887378000  | 1 | -0.810885000 | -2.997644000 | -7.130271000 |
| 7 | 2.972541000  | 0.574430000  | 4.030197000  | 7 | -1.076258000 | 0.902390000  | 4.408079000  |
| 7 | 3.642376000  | 2.159920000  | 2.276599000  | 6 | -1.494223000 | 1.529592000  | 5.652140000  |
| 6 | 4.403056000  | 0.569519000  | 3.849872000  | 1 | -1.753357000 | 0.773338000  | 6.409225000  |
| 1 | 4.926577000  | 0.494757000  | 4.807162000  | 1 | -2.407334000 | 2.089437000  | 5.444428000  |
| 6 | 4.739403000  | 1.885499000  | 3.175361000  | 6 | -0.470257000 | 2.484026000  | 6.253850000  |
| 1 | 4.869762000  | 2.668699000  | 3.938591000  | 1 | 0.440612000  | 1.974051000  | 6.577087000  |
| 1 | 5.693476000  | 1.809311000  | 2.636903000  | 1 | -0.898075000 | 2.972523000  | 7.134532000  |
| 6 | 2.373517000  | -0.576386000 | 4.732403000  | 1 | -0.181104000 | 3.261693000  | 5.543251000  |
| 6 | 3.110368000  | -0.802783000 | 6.055551000  | 6 | 0.253231000  | 0.310462000  | 4.390507000  |
| 1 | 4.128941000  | -1.175650000 | 5.914230000  | 1 | 1.008388000  | 1.097833000  | 4.508387000  |
| 1 | 2.576641000  | -1.548296000 | 6.651152000  | 1 | 0.405308000  | -0.105002000 | 3.392582000  |
| 1 | 3.158094000  | 0.124198000  | 6.634191000  | 6 | 0.477857000  | -0.765018000 | 5.444758000  |
| 6 | 2.444551000  | -1.851559000 | 3.884338000  | 1 | -0.181784000 | -1.623592000 | 5.298030000  |
| 1 | 2.023329000  | -2.706813000 | 4.420327000  | 1 | 0.319418000  | -0.391967000 | 6.461481000  |
| 1 | 3.481272000  | -2.111286000 | 3.637333000  | 1 | 1.507500000  | -1.127849000 | 5.390651000  |
| 6 | 0.913658000  | -0.274858000 | 5.051217000  | 7 | -2.938146000 | 2.341835000  | 3.122128000  |
| 1 | 0.828943000  | 0.623862000  | 5.665560000  | 7 | -3.529203000 | -0.052566000 | 3.381252000  |
| 1 | 0.478938000  | -1.111299000 | 5.604419000  | 6 | -4.358617000 | 2.151417000  | 3.299322000  |
| 1 | 0.329032000  | -0.136197000 | 4.140134000  | 1 | -4.911471000 | 2.141192000  | 2.340343000  |
| 6 | 3.798667000  | 3.295819000  | 1.345487000  | 1 | -4.799275000 | 2.949005000  | 3.905980000  |
| 6 | 4.540007000  | 4.458829000  | 2.016621000  | 6 | -4.515399000 | 0.817035000  | 3.995315000  |
| 1 | 4.038259000  | 4.769455000  | 2.936021000  | 1 | -4.363031000 | 0.941517000  | 5.078021000  |
| 1 | 4.565324000  | 5.319150000  | 1.342078000  | 1 | -5.531027000 | 0.433400000  | 3.854832000  |
| 1 | 5.576151000  | 4.209470000  | 2.262960000  | 6 | -2.512992000 | 3.561412000  | 2.404931000  |
| 6 | 4.616084000  | 2.830200000  | 0.133613000  | 6 | -3.194813000 | 4.778119000  | 3.037581000  |
| 1 | 5.558149000  | 2.363161000  | 0.442123000  | 1 | -4.272809000 | 4.801729000  | 2.853523000  |
| 1 | 4.868839000  | 3.668586000  | -0.522601000 | 1 | -2.776181000 | 5.695024000  | 2.614095000  |
| 6 | 2.446230000  | 3.811709000  | 0.858092000  | 1 | -3.028240000 | 4.797211000  | 4.118606000  |
| 1 | 1.842722000  | 3.022699000  | 0.406332000  | 6 | -2.881680000 | 3.491034000  | 0.918673000  |
| 1 | 2.607533000  | 4.590852000  | 0.108171000  | 1 | -2.315886000 | 2.687777000  | 0.441262000  |
| 1 | 1.870883000  | 4.243995000  | 1.678009000  | 1 | -2.637002000 | 4.426293000  | 0.409275000  |
| 7 | -3.428455000 | -2.860726000 | 2.663671000  | 1 | -3.956157000 | 3.323882000  | 0.777200000  |

|   |              |              |              |   |              |              |              |
|---|--------------|--------------|--------------|---|--------------|--------------|--------------|
| 7 | -4.273899000 | -2.630974000 | 0.381895000  | 6 | -1.004446000 | 3.747392000  | 2.528530000  |
| 6 | -3.463567000 | -4.152714000 | 2.007765000  | 1 | -0.710542000 | 3.854143000  | 3.574543000  |
| 1 | -3.818111000 | -4.930953000 | 2.689560000  | 1 | -0.709241000 | 4.654399000  | 1.994079000  |
| 1 | -2.473704000 | -4.459616000 | 1.635807000  | 1 | -0.457179000 | 2.910418000  | 2.092012000  |
| 6 | -4.424333000 | -3.991840000 | 0.841904000  | 6 | -3.533349000 | -1.457830000 | 3.845154000  |
| 1 | -4.180423000 | -4.716958000 | 0.055713000  | 6 | -3.347226000 | -1.578183000 | 5.362908000  |
| 1 | -5.457161000 | -4.198069000 | 1.166234000  | 1 | -2.401487000 | -1.133341000 | 5.672509000  |
| 6 | -2.671510000 | -2.770754000 | 3.924245000  | 1 | -3.341127000 | -2.630469000 | 5.662679000  |
| 6 | -3.336211000 | -3.674810000 | 4.968565000  | 1 | -4.154748000 | -1.089989000 | 5.915834000  |
| 1 | -2.853306000 | -3.542180000 | 5.941554000  | 6 | -4.875396000 | -2.101952000 | 3.472106000  |
| 1 | -3.259483000 | -4.735652000 | 4.714766000  | 1 | -5.721181000 | -1.655934000 | 4.001480000  |
| 1 | -4.394877000 | -3.422635000 | 5.073369000  | 1 | -4.862956000 | -3.165311000 | 3.726406000  |
| 6 | -2.707962000 | -1.341036000 | 4.458009000  | 6 | -2.432833000 | -2.250926000 | 3.149293000  |
| 1 | -3.734555000 | -1.018695000 | 4.640289000  | 1 | -2.542512000 | -2.233907000 | 2.063517000  |
| 1 | -2.243805000 | -0.644275000 | 3.756768000  | 1 | -2.474694000 | -3.292839000 | 3.477715000  |
| 1 | -2.159868000 | -1.293019000 | 5.403623000  | 1 | -1.438329000 | -1.865956000 | 3.370103000  |
| 6 | -1.212673000 | -3.195652000 | 3.734694000  | 7 | 3.245290000  | 3.849462000  | 0.746657000  |
| 1 | -0.657459000 | -3.101012000 | 4.672924000  | 7 | 1.737768000  | 4.637287000  | -1.015827000 |
| 1 | -0.736171000 | -2.568855000 | 2.978072000  | 6 | 2.492906000  | 5.004388000  | 1.196329000  |
| 1 | -1.137735000 | -4.240259000 | 3.418296000  | 1 | 3.122227000  | 5.680534000  | 1.781857000  |
| 6 | -4.630171000 | -2.305845000 | -1.003329000 | 1 | 1.627149000  | 4.728178000  | 1.817446000  |
| 6 | -3.554154000 | -2.824041000 | -1.963170000 | 6 | 2.021532000  | 5.691696000  | -0.070838000 |
| 1 | -2.599010000 | -2.345293000 | -1.739427000 | 1 | 1.133142000  | 6.300532000  | 0.136789000  |
| 1 | -3.817743000 | -2.611309000 | -3.005063000 | 1 | 2.803947000  | 6.374070000  | -0.443349000 |
| 1 | -3.419608000 | -3.906491000 | -1.870971000 | 6 | 3.891885000  | 3.033540000  | 1.791255000  |
| 6 | -5.977329000 | -2.948424000 | -1.350260000 | 6 | 4.904048000  | 3.902246000  | 2.545258000  |
| 1 | -5.935929000 | -4.040906000 | -1.320141000 | 1 | 5.598504000  | 4.378639000  | 1.847518000  |
| 1 | -6.279306000 | -2.661252000 | -2.361747000 | 1 | 5.483423000  | 3.284328000  | 3.237683000  |
| 1 | -6.756855000 | -2.620519000 | -0.657033000 | 1 | 4.424178000  | 4.685009000  | 3.139120000  |
| 6 | -4.762636000 | -0.795352000 | -1.185854000 | 6 | 4.654806000  | 1.879895000  | 1.145041000  |
| 1 | -5.545790000 | -0.383255000 | -0.547551000 | 1 | 3.980557000  | 1.205048000  | 0.614374000  |
| 1 | -5.020521000 | -0.577206000 | -2.224715000 | 1 | 5.167806000  | 1.302494000  | 1.918824000  |
| 1 | -3.828112000 | -0.281881000 | -0.949792000 | 1 | 5.404126000  | 2.245457000  | 0.441156000  |
| 7 | 0.084046000  | 3.940048000  | -2.905241000 | 6 | 2.873937000  | 2.461794000  | 2.783707000  |
| 7 | -1.878914000 | 4.437430000  | -1.535471000 | 1 | 2.351262000  | 3.252028000  | 3.331291000  |
| 6 | 0.120882000  | 5.306239000  | -2.437953000 | 1 | 3.370894000  | 1.825872000  | 3.523199000  |
| 1 | -0.233005000 | 6.009120000  | -3.209725000 | 1 | 2.129259000  | 1.866297000  | 2.252011000  |
| 1 | 1.135358000  | 5.613466000  | -2.153629000 | 6 | 0.864321000  | 4.935239000  | -2.156632000 |
| 6 | -0.793171000 | 5.352442000  | -1.227808000 | 6 | -0.588585000 | 5.013463000  | -1.677884000 |
| 1 | -1.167657000 | 6.366791000  | -1.067668000 | 1 | -0.890102000 | 4.047659000  | -1.269756000 |
| 1 | -0.231928000 | 5.052997000  | -0.328016000 | 1 | -1.265216000 | 5.278063000  | -2.497664000 |
| 6 | 1.178172000  | 3.443486000  | -3.743016000 | 1 | -0.710063000 | 5.769502000  | -0.895530000 |
| 6 | 1.544275000  | 4.491633000  | -4.799874000 | 6 | 1.268331000  | 6.270950000  | -2.791262000 |

|   |              |              |              |   |              |              |              |
|---|--------------|--------------|--------------|---|--------------|--------------|--------------|
| 1 | 0.678010000  | 4.746220000  | -5.417093000 | 1 | 1.137030000  | 7.113334000  | -2.106266000 |
| 1 | 2.323913000  | 4.099109000  | -5.459550000 | 1 | 0.650505000  | 6.467910000  | -3.672548000 |
| 1 | 1.927444000  | 5.413948000  | -4.354703000 | 1 | 2.314166000  | 6.250242000  | -3.110167000 |
| 6 | 0.756848000  | 2.168616000  | -4.470541000 | 6 | 0.973100000  | 3.851788000  | -3.226614000 |
| 1 | 0.442953000  | 1.396078000  | -3.764791000 | 1 | 1.973319000  | 3.827430000  | -3.661926000 |
| 1 | 1.600115000  | 1.783058000  | -5.050518000 | 1 | 0.254629000  | 4.058983000  | -4.025346000 |
| 1 | -0.066261000 | 2.361332000  | -5.161741000 | 1 | 0.759309000  | 2.864658000  | -2.811163000 |
| 6 | 2.403783000  | 3.145531000  | -2.874709000 | 7 | -2.876813000 | -2.411142000 | -3.124408000 |
| 1 | 2.727936000  | 4.038285000  | -2.332280000 | 7 | -3.524259000 | -0.031687000 | -3.387446000 |
| 1 | 3.249844000  | 2.799045000  | -3.477811000 | 6 | -4.301129000 | -2.254510000 | -3.304174000 |
| 1 | 2.150953000  | 2.376190000  | -2.142217000 | 1 | -4.855599000 | -2.255431000 | -2.346088000 |
| 6 | -2.993095000 | 4.386528000  | -0.565351000 | 1 | -4.721863000 | -3.063300000 | -3.910135000 |
| 6 | -2.498825000 | 4.067703000  | 0.847670000  | 6 | -4.487940000 | -0.925395000 | -4.002704000 |
| 1 | -1.958796000 | 3.119276000  | 0.846093000  | 1 | -4.329793000 | -1.047878000 | -5.084803000 |
| 1 | -3.342033000 | 3.991656000  | 1.540283000  | 1 | -5.512749000 | -0.565812000 | -3.865384000 |
| 1 | -1.831090000 | 4.844895000  | 1.230398000  | 6 | -2.424615000 | -3.619036000 | -2.404019000 |
| 6 | -3.704752000 | 5.743637000  | -0.556220000 | 6 | -2.797304000 | -3.554088000 | -0.918490000 |
| 1 | -3.066706000 | 6.548848000  | -0.181833000 | 1 | -2.252209000 | -2.735954000 | -0.442323000 |
| 1 | -4.581168000 | 5.699631000  | 0.097296000  | 1 | -2.530911000 | -4.481861000 | -0.406292000 |
| 1 | -4.042120000 | 6.013592000  | -1.560140000 | 1 | -3.875700000 | -3.412456000 | -0.779163000 |
| 6 | -4.009197000 | 3.325961000  | -0.983313000 | 6 | -0.911986000 | -3.770480000 | -2.525251000 |
| 1 | -4.395410000 | 3.521042000  | -1.983967000 | 1 | -0.614505000 | -3.873811000 | -3.570601000 |
| 1 | -4.847194000 | 3.334519000  | -0.280373000 | 1 | -0.596386000 | -4.668638000 | -1.987504000 |
| 1 | -3.569729000 | 2.326425000  | -0.971404000 | 1 | -0.384630000 | -2.919686000 | -2.090988000 |
| 7 | 1.258583000  | 2.594730000  | 3.637228000  | 6 | -3.077097000 | -4.852582000 | -3.034986000 |
| 6 | 1.814570000  | 3.274553000  | 4.792832000  | 1 | -4.154505000 | -4.900866000 | -2.852344000 |
| 1 | 2.870139000  | 3.010220000  | 4.867137000  | 1 | -2.637843000 | -5.758617000 | -2.608990000 |
| 1 | 1.354898000  | 2.891678000  | 5.717784000  | 1 | -2.908601000 | -4.870042000 | -4.115736000 |
| 6 | 1.667925000  | 4.790516000  | 4.765506000  | 6 | -3.560920000 | 1.372513000  | -3.853138000 |
| 1 | 2.100851000  | 5.223538000  | 3.860266000  | 6 | -3.374902000 | 1.495363000  | -5.370741000 |
| 1 | 2.178308000  | 5.230510000  | 5.627716000  | 1 | -2.418323000 | 1.072753000  | -5.678195000 |
| 1 | 0.622340000  | 5.105608000  | 4.812890000  | 1 | -3.393247000 | 2.547135000  | -5.671801000 |
| 6 | -0.107836000 | 2.919406000  | 3.274299000  | 1 | -4.169626000 | 0.987481000  | -5.924480000 |
| 1 | -0.360803000 | 2.284944000  | 2.424425000  | 6 | -4.918643000 | 1.985036000  | -3.483580000 |
| 1 | -0.165348000 | 3.956449000  | 2.912699000  | 1 | -5.752570000 | 1.518315000  | -4.013908000 |
| 6 | -1.127595000 | 2.720732000  | 4.385908000  | 1 | -4.930966000 | 3.048047000  | -3.739298000 |
| 1 | -2.118565000 | 3.012953000  | 4.029619000  | 1 | -5.109908000 | 1.903895000  | -2.408430000 |
| 1 | -0.908752000 | 3.328602000  | 5.269438000  | 6 | -2.480870000 | 2.192358000  | -3.156325000 |
| 1 | -1.180380000 | 1.676654000  | 4.700430000  | 1 | -2.591860000 | 2.174750000  | -2.070689000 |
| 7 | 3.360474000  | -2.611507000 | -2.467871000 | 1 | -2.546467000 | 3.232448000  | -3.486621000 |
| 7 | 1.903320000  | -4.286301000 | -1.351468000 | 1 | -1.477108000 | 1.830580000  | -3.374390000 |
| 6 | 3.981217000  | -3.921489000 | -2.400770000 | 7 | 3.342971000  | -3.772428000 | -0.743767000 |
| 1 | 5.057673000  | -3.844728000 | -2.216040000 | 7 | 1.851944000  | -4.595332000 | 1.016666000  |



|   |              |              |              |   |              |              |              |
|---|--------------|--------------|--------------|---|--------------|--------------|--------------|
| 1 | 3.849816000  | -4.506481000 | -3.324228000 | 6 | 2.617464000  | -4.943954000 | -1.194798000 |
| 6 | 3.302515000  | -4.627305000 | -1.249298000 | 1 | 3.262473000  | -5.605087000 | -1.780378000 |
| 1 | 3.457740000  | -5.707835000 | -1.322943000 | 1 | 1.745963000  | -4.687169000 | -1.816253000 |
| 1 | 3.753997000  | -4.304398000 | -0.291838000 | 6 | 2.161164000  | -5.642591000 | 0.071622000  |
| 6 | 3.894183000  | -1.705545000 | -3.509148000 | 1 | 1.287423000  | -6.271927000 | -0.136957000 |
| 6 | 5.400429000  | -1.512890000 | -3.283618000 | 1 | 2.958995000  | -6.306555000 | 0.444660000  |
| 1 | 5.616216000  | -1.226467000 | -2.248583000 | 6 | 3.972647000  | -2.941823000 | -1.787188000 |
| 1 | 5.773261000  | -0.714968000 | -3.931510000 | 6 | 5.006135000  | -3.787042000 | -2.538950000 |
| 1 | 5.980570000  | -2.410151000 | -3.513078000 | 1 | 5.710024000  | -4.247044000 | -1.839674000 |
| 6 | 3.230887000  | -0.337284000 | -3.405864000 | 1 | 5.572426000  | -3.156048000 | -3.230398000 |
| 1 | 2.145568000  | -0.392801000 | -3.471964000 | 1 | 4.545728000  | -4.580863000 | -3.133543000 |
| 1 | 3.593600000  | 0.304433000  | -4.213427000 | 6 | 4.707392000  | -1.770720000 | -1.139707000 |
| 6 | 3.695693000  | -2.241489000 | -4.932708000 | 1 | 4.016771000  | -1.111656000 | -0.610275000 |
| 1 | 4.141397000  | -3.231491000 | -5.062439000 | 1 | 5.208134000  | -1.181549000 | -1.912659000 |
| 1 | 4.172391000  | -1.574858000 | -5.658045000 | 1 | 5.463812000  | -2.118745000 | -0.434524000 |
| 1 | 2.637002000  | -2.305793000 | -5.179381000 | 6 | 2.943705000  | -2.393989000 | -2.781762000 |
| 6 | 1.005379000  | -4.846905000 | -0.318953000 | 1 | 2.439765000  | -3.196230000 | -3.329429000 |
| 6 | 1.208764000  | -6.363344000 | -0.250152000 | 1 | 3.427420000  | -1.747752000 | -3.521068000 |
| 1 | 1.110858000  | -6.813967000 | -1.242280000 | 1 | 2.185109000  | -1.814742000 | -2.251856000 |
| 1 | 0.449218000  | -6.806173000 | 0.399731000  | 6 | 0.984659000  | -4.914150000 | 2.156573000  |
| 1 | 2.183354000  | -6.640863000 | 0.161366000  | 6 | -0.465518000 | -5.026722000 | 1.676359000  |
| 6 | 1.284694000  | -4.231829000 | 1.055575000  | 1 | -0.789528000 | -4.068372000 | 1.267885000  |
| 1 | 2.320020000  | -4.400407000 | 1.372645000  | 1 | -1.136497000 | -5.307197000 | 2.495495000  |
| 1 | 0.641118000  | -4.673441000 | 1.820566000  | 1 | -0.568389000 | -5.785416000 | 0.893915000  |
| 1 | 1.088003000  | -3.158327000 | 1.024852000  | 6 | 1.419539000  | -6.240104000 | 2.791263000  |
| 6 | -0.446555000 | -4.583550000 | -0.700804000 | 1 | 1.308886000  | -7.085162000 | 2.105920000  |
| 1 | -0.668689000 | -3.516315000 | -0.731063000 | 1 | 0.805702000  | -6.451888000 | 3.671894000  |
| 1 | -1.107371000 | -5.039889000 | 0.040477000  | 1 | 2.464277000  | -6.194711000 | 3.111181000  |
| 1 | -0.675719000 | -5.018135000 | -1.674851000 | 6 | 1.066611000  | -3.828796000 | 3.227003000  |
| 1 | 4.041564000  | 2.117233000  | -0.463313000 | 1 | 2.065424000  | -3.781076000 | 3.663590000  |
| 1 | 1.869816000  | -1.712934000 | 2.966334000  | 1 | 0.352226000  | -4.053066000 | 4.024779000  |
| 1 | 3.464380000  | 0.161637000  | -2.462635000 | 1 | 0.830196000  | -2.846786000 | 2.811695000  |
| 1 | 4.764069000  | -0.280142000 | 3.235996000  | 1 | -5.066448000 | -2.023816000 | 2.396704000  |

**Table S14:** Single-crystal X-ray Crystallography Data

|                                         | 2-Ce <sup>Li</sup>                                                  | 2-Ce <sup>Na</sup>                                                  | 2-Ce <sup>K18c6</sup>                                                              | 2-Ce <sup>Rb</sup>                                                   | 2-Ce <sup>Cs</sup>                                                  |
|-----------------------------------------|---------------------------------------------------------------------|---------------------------------------------------------------------|------------------------------------------------------------------------------------|----------------------------------------------------------------------|---------------------------------------------------------------------|
| Formula                                 | C <sub>56</sub> H <sub>128</sub> CeLiN <sub>16</sub> P <sub>4</sub> | C <sub>56</sub> H <sub>128</sub> CeN <sub>16</sub> NaP <sub>4</sub> | C <sub>80</sub> H <sub>176</sub> CeKN <sub>16</sub> O <sub>12</sub> P <sub>4</sub> | C <sub>56</sub> H <sub>128</sub> CeN <sub>16</sub> P <sub>4</sub> Rb | C <sub>56</sub> H <sub>128</sub> CeCsN <sub>16</sub> P <sub>4</sub> |
| Formula Weight/gmol <sup>-1</sup>       | 1296.70                                                             | 1312.75                                                             | 1857.50                                                                            | 1375.23                                                              | 1422.64                                                             |
| Collection Temperature/K                | 100(2)                                                              | 100(2)                                                              | 100(2)                                                                             | 100(2)                                                               | 100(2)                                                              |
| Space Group [System]                    | P2 <sub>1</sub> /c [monoclinic]                                     | P2 <sub>1</sub> /n [monoclinic]                                     | P2 <sub>1</sub> /c [monoclinic]                                                    | P-1 [triclinic]                                                      | P1 [triclinic]                                                      |
| Resolution/Å                            | 0.83                                                                | 0.70                                                                | 0.85                                                                               | 0.82                                                                 | 0.61                                                                |
| a/Å                                     | 28.658(6)                                                           | 14.1551(7)                                                          | 20.5497(14)                                                                        | 13.8280(10)                                                          | 13.915(3)                                                           |
| b/Å                                     | 22.627(5)                                                           | 23.2285(12)                                                         | 18.8590(12)                                                                        | 13.9994(10)                                                          | 13.928(2)                                                           |
| c/Å                                     | 25.312(5)                                                           | 22.8762(12)                                                         | 28.366(2)                                                                          | 23.9161(17)                                                          | 24.247(5)                                                           |
| α/°                                     | 90                                                                  | 90                                                                  | 90                                                                                 | 95.768(3)                                                            | 105.027(7)                                                          |
| β/°                                     | 115.73(3)                                                           | 99.179(2)                                                           | 107.014(2)                                                                         | 105.731(3)                                                           | 96.887(7)                                                           |
| γ/°                                     | 90                                                                  | 90                                                                  | 90                                                                                 | 108.564(3)                                                           | 109.734(6)                                                          |
| Volume/Å <sup>3</sup>                   | 14786(7)                                                            | 7425.4(7)                                                           | 10512.1(12)                                                                        | 4135.0(5)                                                            | 4159.3(14)                                                          |
| Z [Z']                                  | 4 [1]                                                               | 2 [0.5]                                                             | 4 [1]                                                                              | 1 [0.5]                                                              | 1 [1]                                                               |
| ρ/gcm <sup>-3</sup>                     | 1.198                                                               | 1.207                                                               | 1.220                                                                              | 1.253                                                                | 1.253                                                               |
| μ/mm <sup>-1</sup>                      | 0.748                                                               | 0.751                                                               | 0.594                                                                              | 1.262                                                                | 1.102                                                               |
| F(000)                                  | 5744.0                                                              | 2904.0                                                              | 4172.0                                                                             | 1672.0                                                               | 1663.0                                                              |
| Crystal Size/mm <sup>3</sup>            | 0.348 x 0.29 x 0.224                                                | 0.426 x 0.374 x 0.228                                               | 0.3 x 0.3 x 0.2                                                                    | 0.477 x 0.311 x 0.256                                                | 0.308 x 0.28 x 0.18                                                 |
| Radiation Type                          | MoKα(λ=0.71073)                                                     | MoKα(λ=0.71073)                                                     | MoKα(λ=0.71073)                                                                    | MoKα(λ=0.71073)                                                      | MoKα(λ=0.71073)                                                     |
| Physical Description                    | Yellow prism                                                        | Yellow prism                                                        | Colorless prism                                                                    | Colorless prism                                                      | Colorless plate                                                     |
| Collection 2θ range/°                   | 3.688 to 50.734                                                     | 3.402 to 61.016                                                     | 3.61 to 49.426                                                                     | 3.886 to 51.362                                                      | 4.000 to 71.262                                                     |
| Index Ranges                            | -34 ≤ h ≤ 34;<br>-27 ≤ k ≤ 26;<br>-30 ≤ l ≤ 30                      | -17 ≤ h ≤ 20;<br>-33 ≤ k ≤ 33;<br>-32 ≤ l ≤ 32                      | -24 ≤ h ≤ 24;<br>-22 ≤ k ≤ 22;<br>-33 ≤ l ≤ 33                                     | -16 ≤ h ≤ 16;<br>-17 ≤ k ≤ 17;<br>-29 ≤ l ≤ 29                       | -22 ≤ h ≤ 22;<br>-22 ≤ k ≤ 22;<br>-39 ≤ l ≤ 39                      |
| Reflections Collected                   | 249753                                                              | 225204                                                              | 265941                                                                             | 85806                                                                | 112618                                                              |
| Independent Reflections                 | 27060 [R <sub>int</sub> =0.0772,<br>R <sub>sigma</sub> =0.0415]     | 22555 [R <sub>int</sub> =0.07184,<br>R <sub>sigma</sub> =0.0361]    | 17753 [R <sub>int</sub> =0.1297,<br>R <sub>sigma</sub> =0.0431]                    | 15631 [R <sub>int</sub> =0.0619,<br>R <sub>sigma</sub> =0.0431]      | 64250 [R <sub>int</sub> =0.0558,<br>R <sub>sigma</sub> =0.0741]     |
| Data/Restraints/Parameters              | 27060/7411/2160                                                     | 22555/2567/1020                                                     | 17753/1443/1337                                                                    | 15631/180/871                                                        | 64250/445/1658                                                      |
| Goodness of Fit                         | 1.146                                                               | 1.036                                                               | 1.158                                                                              | 1.094                                                                | 1.101                                                               |
| Final R Indices<br>(I ≥ 2σ)             | R <sub>1</sub> =0.0858,<br>wR <sub>2</sub> =0.1805                  | R <sub>1</sub> =0.0446,<br>wR <sub>2</sub> =0.1069                  | R <sub>1</sub> =0.1296,<br>wR <sub>2</sub> =0.2645                                 | R <sub>1</sub> =0.0856,<br>wR <sub>2</sub> =0.2284                   | R <sub>1</sub> =0.0538,<br>wR <sub>2</sub> =0.1183                  |
| Final R Indices<br>(all data)           | R <sub>1</sub> =0.0931,<br>wR <sub>2</sub> =0.1847                  | R <sub>1</sub> =0.0536,<br>wR <sub>2</sub> =0.1145                  | R <sub>1</sub> =0.1389,<br>wR <sub>2</sub> =0.2699                                 | R <sub>1</sub> =0.0987,<br>wR <sub>2</sub> =0.2432                   | R <sub>1</sub> =0.0588,<br>wR <sub>2</sub> =0.1363                  |
| Largest Diff. Peak/Hole/eÅ <sup>3</sup> | 2.0/-1.6                                                            | 2.0/-1.6                                                            | 2.2/-2.2                                                                           | 5.4/-2.9                                                             | 3.6/-3.6                                                            |
| Completeness to 2θ/%                    | 99.9                                                                | 100                                                                 | 99.1                                                                               | 99.6                                                                 | 100                                                                 |
| CCDC Number                             | 2248373                                                             | 2248374                                                             | 2248368                                                                            | 2248375                                                              | 2248365                                                             |

### Crystallography Details:

Crystals suitable for X-ray diffraction were coated in paratone or Cargille-NVH oil in a glovebox and transferred to the diffractometer in a 20 mL capped vial. Crystals were mounted on a nylon loop on a Bruker D8 VENTURE diffractometer dual wavelength Mo/Cu four-circle diffractometer with a microfocus sealed X-ray tube using a mirror optics as monochromator and a Bruker PHOTON II detector. The diffractometer is equipped with an Oxford Cryostream 800 cryostat and crystals were cooled and kept at  $T = 100(2)$  K during data collection. All data were integrated with SAINT and a multi-scan absorption correction using SADABS was applied.<sup>29</sup> The structures were solved with the ShelXT structure solution program using the Intrinsic Phasing solution method and refined by full-matrix least-squares methods against  $F^2$  using SHELXL-2014<sup>30</sup> and by using Olex2 1.5-alpha<sup>31</sup> as the graphical interface. All non-hydrogen atoms were refined with anisotropic displacement parameters. All hydrogen atoms were refined isotropically on calculated positions using a riding model with their Uiso values constrained to 1.5 times the Ueq of their pivot atoms for terminal sp<sup>3</sup> carbon atoms and 1.2 times for all other carbon atoms. Disordered moieties were refined using bond lengths restraints and displacement parameter restraints. Crystallographic data for the structures reported in this paper have been deposited with the Cambridge Crystallographic Data Centre.

### 2-Ce<sup>Li</sup>

The Li-Ce-structure of **2-Ce<sup>Li</sup>** was found to be complicated by superlattice reflections. Initially, a smaller monoclinic cell was identified, but it did not capture all the reflections. Subsequently, a much larger triclinic cell was used, which captured all the data. However, it was later discovered that the data had monoclinic symmetry. A low symmetry cerium structure with 18 residues obtained with the triclinic cell was correct.

From this preliminary structure and the 2/m Laue symmetry, we identified a smaller cell in P21/c that contains two independent molecules with some of the ligands disordered, and it indexed most of the reflections. This cell was larger than the small monoclinic cell, and some weak superlattice reflections were present. The large triclinic cell transforms into an even larger cell with the correct Laue symmetry (2/m), but would result in a cumbersome and unyielding model, and hence we decided that the smaller cell (with correct Laue symmetry and with superlattice data) was the best cell for studying the chemical structure.

It is possible that there was a phase transition close to the data collection temperature. The Ce atom Ce2 is lifted off its mean position by either dynamic or static disorder and could be modeled by splitting it into two parts. However, instead of doing this, it was modeled as one component with an elongated ellipsoid representing the disorder. This was done so that the metal-ligand geometries could be analyzed (splitting the Ce atom would create two additional sets of metal-ligand bonds). The complexity of the model, correlated parameters would be extreme, and reliable bond distances and angles could not be obtained. Instead, the equilibrium position gave more reliable and simplified geometries.

For this structural model of **2-Ce<sup>Li</sup>** in P21/c, there are two molecules with four ligands each. There are eight components to the ligand disorder (i.e., two groups of atoms), and at least one of the Li atoms and one of the Ce atoms could be split, resulting in as many as 16 components to the disorder. We identified the components that can be thought of as representing the two unique CeL4-Li group of atoms (two CeL4 tetrahedra). The distortions and geometries of the ligands were straightforward to analyze once this was done. Finally, all the atoms (except H) were refined anisotropically.

### 2-Ce<sup>K18c6</sup>

Despite having good signal-to-noise ( $I/\sigma$ ),  $R_{int}$  and  $R_1$  are higher because the reflections were, on the whole, very broad indicating a high-degree of crystal mosaicity. The diffraction data for this structure is highly broadened with poor peak profiles, indicating extensive crystal decomposition. Overall data for the **2-Ce<sup>K18c6</sup>** structure suffers from broadened (and weakened) data. As a result, the merging R-values were large. A very large number of reflections were collected in order to improve the overall data quality (and this gave better  $I/\sigma$  for the low angle data). It was observed that the reflections are not affected by the decay equally. It is observed the higher angle data is weakened the most to the point that the higher angle data are impacted at a much higher level, with the data above 1.1 Å being the most troublesome. However, a satisfactory model is obtained by including the larger number of reflections with no salient alerts.

### 2-Ce<sup>Rb</sup>

The oblate N4 atom is not due to weak data. Instead, it must arise from the intensities of some of the twinned reflections being incorrect. The intensities consist of overlaps, partial overlaps and isolated reflections (from

one component only). The intensities are increased by a factor from the other twin domain. The twin law corrects the intensities by presuming that the intensities have been treated equally during the integration. The data integration process is affected by the twinning. The errors in the integration of the twin cannot be completely approximated by the twin law and the corrected data, even though the twin law is valid, presumes that there were no errors in integrating the twinned reflections. The ADP is a measure of the spread of electron density around an atom in a crystal structure. This distortion is caused by a combination of factors, including weak data. In this case, the crystals were twinned. Twinning is the main factor causing extra electron density at the N4 atom, which is then reflected in the ADP values. The weak data could also be contributing to the distortion of the thermal ellipsoids of the atomic positions although other atoms are fine. The twinning operation involves a 180-degree rotation around an axis that is parallel to the b-axis 0 1 0. This is the axis that bisects the Ce-N bond with the prolate N. It is a reflection through a plane perpendicular to the axis h0l plane. This is known as the 100 reflection twin, also called the spinel twin or normal twin. In this type of twinning, the twin domains are related by a reflection through a common twin plane, resulting in a mirror image relationship between the two domains. The 100 reflection twin is commonly observed in crystals with low symmetry and this one with its triclinic unit cell is one such example.

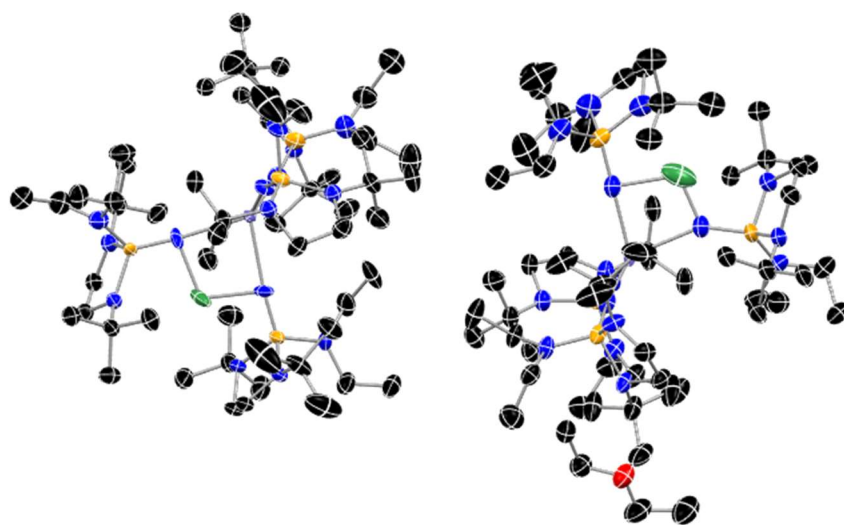

**Figure S108.** Asymmetric unit of **2-Ce<sup>II</sup>**. C atoms are shown in black, N in blue, O in red, P in orange, Li in green, and Ce in light blue. H atoms are omitted for clarity. Thermal ellipsoids drawn at 50% probability level.

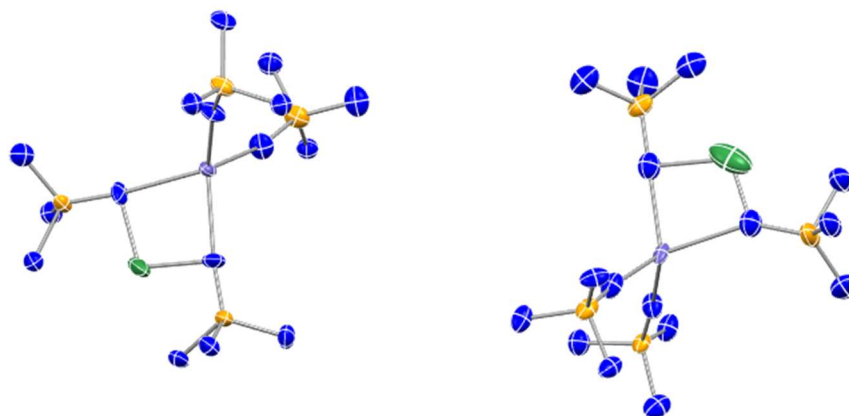

**Figure S109.** Truncated asymmetric unit of **2-Ce<sup>Li</sup>**. N atoms are shown in blue, P in orange, Li in green, and Ce in light blue. H atoms are omitted for clarity. Thermal ellipsoids drawn at 50% probability level.

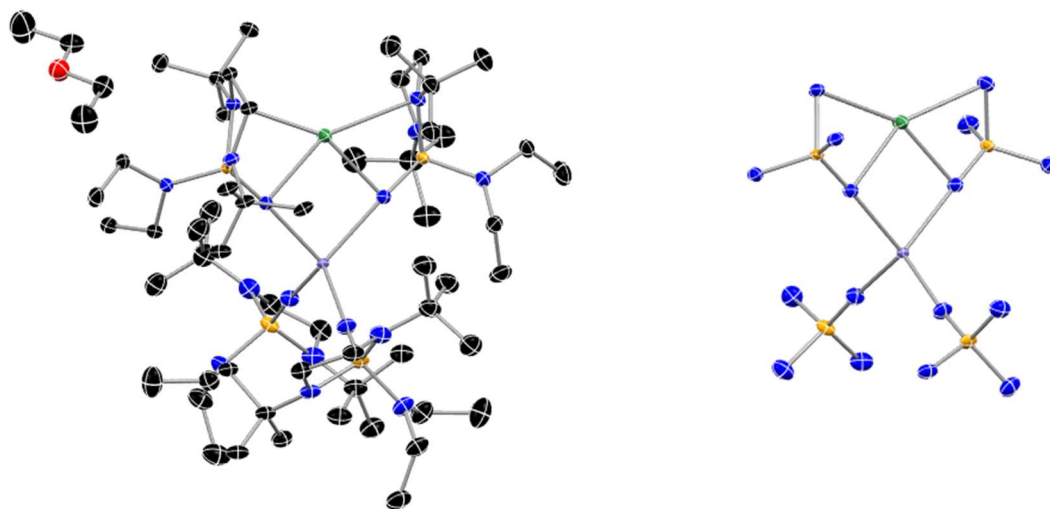

**Figure S110.** Asymmetric unit of **2-Ce<sup>Na</sup>** (left) and truncated asymmetric unit of **2-Ce<sup>Na</sup>** (right). C atoms are shown in black, N in blue, O in red, P in orange, Na in green, and Ce in light blue. H atoms are omitted for clarity. Thermal ellipsoids drawn at 50% probability level.

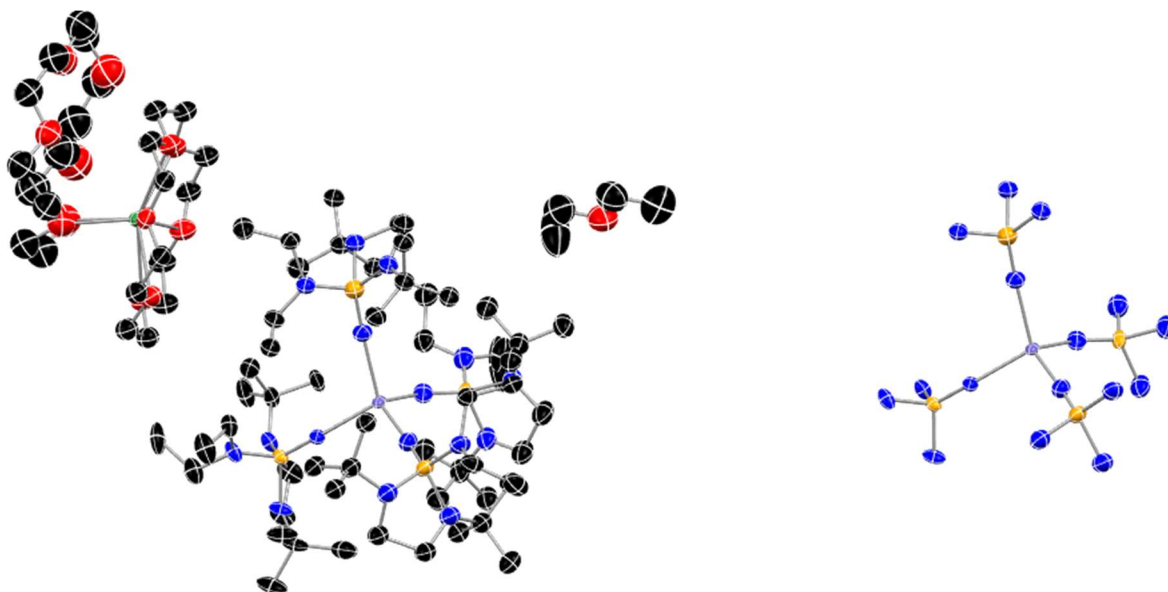

**Figure S111.** Asymmetric unit of **2-Ce<sup>K18c6</sup>** (left) and truncated asymmetric unit of **2-Ce<sup>K18c6</sup>** (right). C atoms are shown in black, N in blue, O in red, P in orange, K in green, and Ce in light blue. Hydrogen atoms are omitted for clarity. Thermal ellipsoids drawn at 50% probability level.

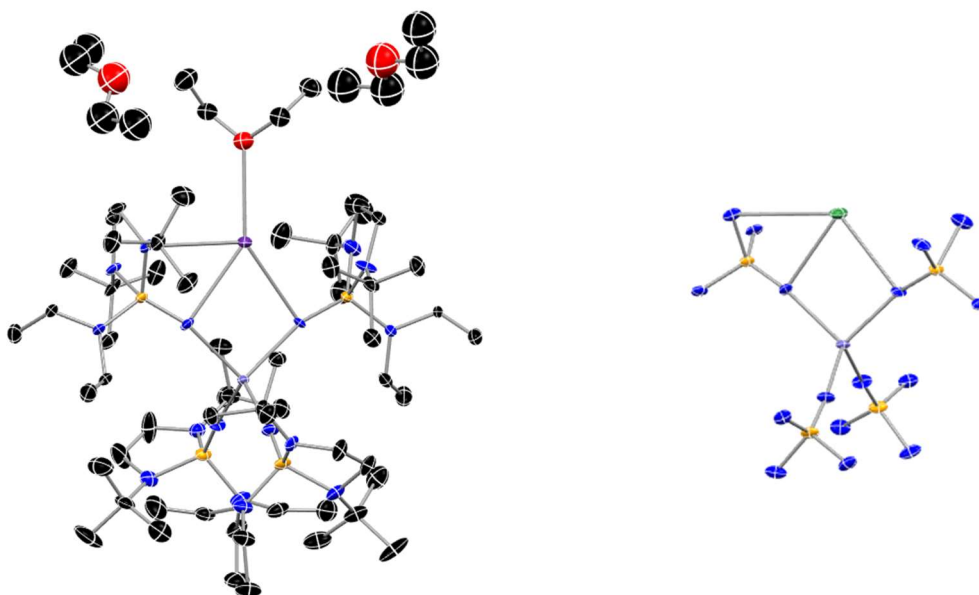

**Figure S112.** Asymmetric unit of **2-Ce<sup>Rb</sup>** (left) and truncated asymmetric unit of **2-Ce<sup>Rb</sup>** (right). C atoms are shown in black, N in blue, O in red, P in orange, Rb in green, and Ce in light blue. H atoms are omitted for clarity. Thermal ellipsoids drawn at 50% probability level.

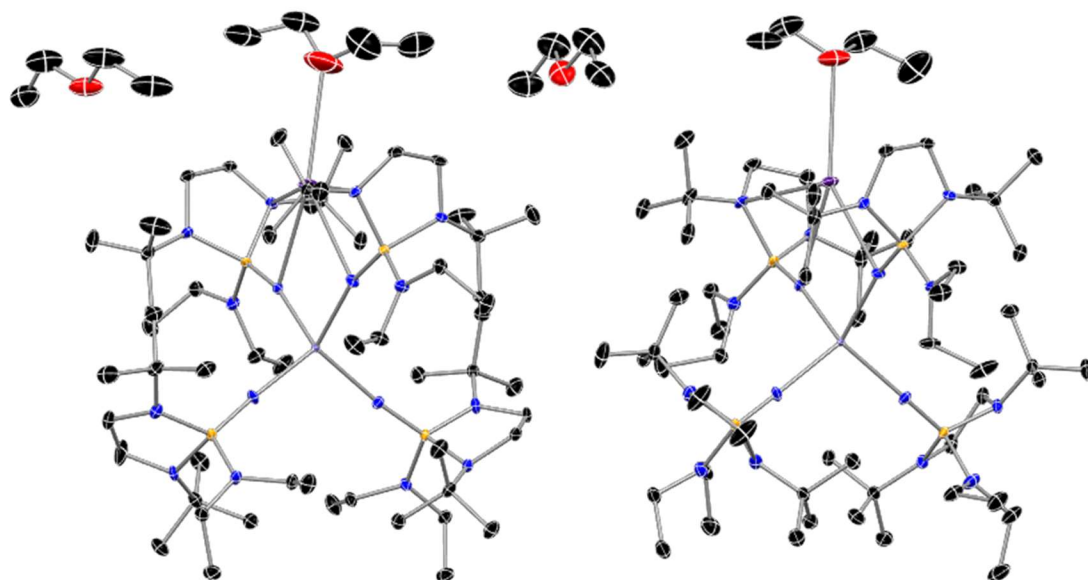

**Figure S113.** Asymmetric unit of **2-CeCs**. C atoms are shown in black, N in blue, O in red, P in orange, Cs in purple, and Ce in light blue. H atoms are omitted for clarity. Thermal ellipsoids drawn at 50% probability level.

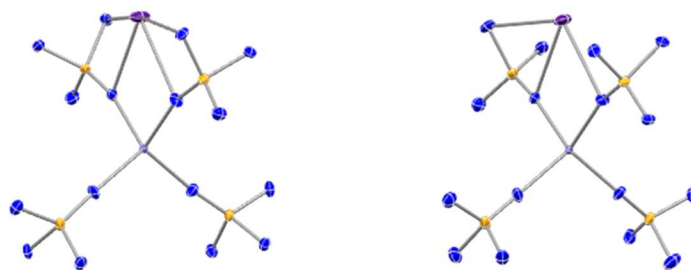

**Figure S114.** Truncated asymmetric unit of **2-CeCs**. N atoms are shown in blue, P in orange, Cs in purple, and Ce in light blue. H atoms are omitted for clarity. Thermal ellipsoids drawn at 50% probability level.

**Table S15.** Bond distances for 2-Ce<sup>II</sup>.

| Atom | Atom  | Length/Å   | Atom   | Atom   | Length/Å  |
|------|-------|------------|--------|--------|-----------|
| Ce1  | N2    | 2.300(4)   | N3_1   | C3_1   | 1.473(10) |
| Ce1  | N3    | 2.392(4)   | N4_1   | C11_1  | 1.466(10) |
| Ce1  | Li1   | 3.021(11)  | N4_1   | C13_1  | 1.454(10) |
| Ce1  | N1    | 2.305(5)   | C1_1   | C2_1   | 1.524(2)  |
| Ce1  | N1B   | 2.305(5)   | C3_1   | C4_1   | 1.546(12) |
| Ce1  | N17_3 | 2.400(4)   | C3_1   | C5_1   | 1.510(11) |
| Ce1  | N17_4 | 2.400(4)   | C3_1   | C6_1   | 1.549(12) |
| Ce2  | N9    | 2.315(6)   | C7_1   | C8_1   | 1.530(13) |
| Ce2  | Li2   | 2.968(17)  | C7_1   | C9_1   | 1.518(12) |
| Ce2  | N1_1  | 2.272(5)   | C7_1   | C10_1  | 1.533(13) |
| Ce2  | N1_2  | 2.515(9)   | C11_1  | C12_1  | 1.528(2)  |
| Ce2  | N17_6 | 2.293(6)   | C13_1  | C14_1  | 1.527(2)  |
| Ce2  | N17_7 | 2.293(6)   | N1_2   | P1_2   | 1.544(8)  |
| Ce2  | N17_8 | 2.412(6)   | P1_2   | N2_2   | 1.672(9)  |
| Ce2  | N17_9 | 2.325(8)   | P1_2   | N3_2   | 1.700(9)  |
| P2   | N2    | 1.517(4)   | P1_2   | N4_2   | 1.706(8)  |
| P2   | N20   | 1.656(4)   | N2_2   | C1_2   | 1.439(12) |
| P2   | N22   | 1.702(3)   | N2_2   | C7_2   | 1.486(11) |
| P2   | N21'  | 1.636(14)  | N3_2   | C2_2   | 1.484(12) |
| N20  | C201  | 1.499(10)  | N3_2   | C3_2   | 1.468(11) |
| N20  | C203  | 1.465(9)   | N4_2   | C11_2  | 1.439(11) |
| C201 | C202  | 1.527(2)   | N4_2   | C13_2  | 1.461(11) |
| C203 | C204  | 1.528(2)   | C1_2   | C2_2   | 1.520(12) |
| N21  | C21   | 1.523(17)  | C3_2   | C4_2   | 1.526(13) |
| N21  | C23   | 1.510(17)  | C3_2   | C5_2   | 1.529(13) |
| N22  | C22   | 1.486(17)  | C3_2   | C6_2   | 1.547(12) |
| N22  | C24   | 1.475(15)  | C7_2   | C8_2   | 1.536(14) |
| C21  | C211  | 1.57(2)    | C7_2   | C9_2   | 1.540(14) |
| C21  | C212  | 1.54(2)    | C7_2   | C10_2  | 1.518(14) |
| C21  | C213  | 1.52(2)    | C11_2  | C12_2  | 1.506(12) |
| C22  | C221  | 1.56(3)    | C13_2  | C14_2  | 1.526(12) |
| C22  | C222  | 1.53(2)    | N17_3  | P17_3  | 1.565(7)  |
| C22  | C223  | 1.55(2)    | P17_3  | N47_3  | 1.722(8)  |
| C23  | C24   | 1.5242(16) | P17_3  | N57_3  | 1.702(8)  |
| N21' | C21'  | 1.42(2)    | P17_3  | N67_3  | 1.647(8)  |
| N21' | C23'  | 1.44(2)    | N47_3  | C17_3  | 1.474(11) |
| N22' | C22'  | 1.49(2)    | N47_3  | C77_3  | 1.500(10) |
| N22' | C24'  | 1.41(2)    | N57_3  | C27_3  | 1.469(11) |
| C21' | C21A  | 1.56(2)    | N57_3  | C37_3  | 1.484(10) |
| C21' | C21B  | 1.52(2)    | N67_3  | C117_3 | 1.474(3)  |
| C21' | C21C  | 1.53(2)    | N67_3  | C137_3 | 1.487(10) |
| C22' | C22A  | 1.57(2)    | C17_3  | C27_3  | 1.525(2)  |
| C22' | C22B  | 1.54(2)    | C37_3  | C47_3  | 1.529(4)  |
| C22' | C22C  | 1.55(3)    | C37_3  | C57_3  | 1.529(4)  |
| C23' | C24'  | 1.525(2)   | C37_3  | C67_3  | 1.530(4)  |
| P3   | N3    | 1.507(4)   | C77_3  | C87_3  | 1.544(11) |
| P3   | N30   | 1.677(4)   | C77_3  | C97_3  | 1.524(12) |
| P3   | N31   | 1.725(6)   | C77_3  | C107_3 | 1.520(12) |
| P3   | N32   | 1.732(5)   | C117_3 | C127_3 | 1.518(8)  |
| N3   | Li1   | 2.000(15)  | C137_3 | C147_3 | 1.521(12) |
| N30  | C301  | 1.474(3)   | N17_4  | P17_4  | 1.495(6)  |
| N30  | C303  | 1.472(3)   | P17_4  | N47_4  | 1.684(5)  |
| C301 | C302  | 1.534(11)  | P17_4  | N57_4  | 1.712(6)  |
| N31  | C31   | 1.493(10)  | P17_4  | N67_4  | 1.644(5)  |



|      |       |            |        |        |            |
|------|-------|------------|--------|--------|------------|
| N31  | C33   | 1.462(9)   | N47_4  | C17_4  | 1.448(8)   |
| N31  | Li1   | 2.529(14)  | N47_4  | C77_4  | 1.498(9)   |
| N32  | C32   | 1.449(10)  | N57_4  | C27_4  | 1.448(9)   |
| N32  | C34   | 1.429(8)   | N57_4  | C37_4  | 1.465(9)   |
| C31  | C311  | 1.537(11)  | N67_4  | C117_4 | 1.477(3)   |
| C31  | C312  | 1.518(10)  | N67_4  | C137_4 | 1.475(3)   |
| C31  | C313  | 1.512(11)  | C17_4  | C27_4  | 1.5245(15) |
| C32  | C321  | 1.529(4)   | C37_4  | C47_4  | 1.542(11)  |
| C32  | C322  | 1.530(4)   | C37_4  | C57_4  | 1.537(10)  |
| C32  | C323  | 1.529(4)   | C37_4  | C67_4  | 1.526(10)  |
| C33  | C34   | 1.524(2)   | C77_4  | C87_4  | 1.527(10)  |
| P5   | N9    | 1.531(7)   | C77_4  | C97_4  | 1.535(10)  |
| P5   | N50   | 1.677(6)   | C77_4  | C107_4 | 1.528(11)  |
| P5   | N51   | 1.716(6)   | C117_4 | C127_4 | 1.526(3)   |
| P5   | N52   | 1.687(6)   | C137_4 | C147_4 | 1.527(3)   |
| N50  | C501  | 1.473(3)   | N17_6  | P17_6  | 1.580(7)   |
| N50  | C503  | 1.473(3)   | P17_6  | N47_6  | 1.698(9)   |
| N51  | C51   | 1.499(7)   | P17_6  | N57_6  | 1.735(9)   |
| N51  | C53   | 1.465(9)   | P17_6  | N67_6  | 1.682(9)   |
| N52  | C52   | 1.480(7)   | N47_6  | C17_6  | 1.437(12)  |
| N52  | C54   | 1.434(9)   | N47_6  | C77_6  | 1.495(11)  |
| C51  | C511  | 1.526(3)   | N57_6  | C27_6  | 1.487(12)  |
| C51  | C512  | 1.526(3)   | N57_6  | C37_6  | 1.483(11)  |
| C51  | C513  | 1.526(3)   | N67_6  | C117_6 | 1.466(11)  |
| C52  | C521  | 1.526(3)   | N67_6  | C137_6 | 1.431(11)  |
| C52  | C522  | 1.526(3)   | C17_6  | C27_6  | 1.535(12)  |
| C52  | C523  | 1.526(3)   | C37_6  | C47_6  | 1.530(6)   |
| C53  | C54   | 1.524(2)   | C37_6  | C57_6  | 1.530(6)   |
| C501 | C502  | 1.520(11)  | C37_6  | C67_6  | 1.530(6)   |
| C503 | C504  | 1.509(12)  | C77_6  | C87_6  | 1.531(13)  |
| Li1  | N17_3 | 2.009(15)  | C77_6  | C97_6  | 1.539(12)  |
| Li1  | N47_3 | 2.666(17)  | C77_6  | C107_6 | 1.508(13)  |
| Li1  | N17_4 | 2.009(15)  | C117_6 | C127_6 | 1.515(13)  |
| Li1  | P17_4 | 2.673(15)  | C137_6 | C147_6 | 1.525(13)  |
| Li2  | N1_1  | 2.09(2)    | N17_7  | P17_7  | 1.498(6)   |
| Li2  | N3_1  | 2.56(2)    | P17_7  | N47_7  | 1.697(7)   |
| Li2  | N1_2  | 1.56(2)    | P17_7  | N57_7  | 1.714(6)   |
| Li2  | P1_2  | 2.63(3)    | P17_7  | N67_7  | 1.661(6)   |
| Li2  | N17_8 | 1.76(2)    | N47_7  | C17_7  | 1.447(10)  |
| Li2  | N17_9 | 2.16(2)    | N47_7  | C77_7  | 1.486(10)  |
| N1   | P1    | 1.588(8)   | N57_7  | C27_7  | 1.462(9)   |
| P1   | N4    | 1.689(5)   | N57_7  | C37_7  | 1.475(9)   |
| P1   | N5    | 1.711(6)   | N67_7  | C117_7 | 1.462(9)   |
| P1   | N6    | 1.640(5)   | N67_7  | C137_7 | 1.453(9)   |
| N4   | C1    | 1.451(8)   | C17_7  | C27_7  | 1.524(2)   |
| N4   | C7    | 1.494(8)   | C37_7  | C47_7  | 1.522(11)  |
| N5   | C2    | 1.443(9)   | C37_7  | C57_7  | 1.529(11)  |
| N5   | C3    | 1.464(9)   | C37_7  | C67_7  | 1.537(11)  |
| N6   | C11   | 1.472(3)   | C77_7  | C87_7  | 1.533(12)  |
| N6   | C13   | 1.472(3)   | C77_7  | C97_7  | 1.528(11)  |
| C1   | C2    | 1.5237(16) | C77_7  | C107_7 | 1.529(12)  |
| C3   | C4    | 1.542(10)  | C117_7 | C127_7 | 1.527(2)   |
| C3   | C5    | 1.537(10)  | C137_7 | C147_7 | 1.528(2)   |
| C3   | C6    | 1.527(10)  | N17_8  | P17_8  | 1.577(5)   |
| C7   | C8    | 1.528(10)  | P17_8  | N47_8  | 1.702(3)   |
| C7   | C9    | 1.535(10)  | P17_8  | N57_8  | 1.702(3)   |
| C7   | C10   | 1.530(11)  | P17_8  | N67_8  | 1.660(7)   |
| C11  | C12   | 1.527(2)   | N47_8  | C17_8  | 1.450(10)  |

|      |      |           |        |        |           |
|------|------|-----------|--------|--------|-----------|
| C13  | C14  | 1.528(2)  | N47_8  | C77_8  | 1.514(10) |
| N1B  | P1B  | 1.467(9)  | N57_8  | C27_8  | 1.467(9)  |
| P1B  | N4B  | 1.739(9)  | N57_8  | C37_8  | 1.462(10) |
| P1B  | N5B  | 1.687(8)  | N67_8  | C117_8 | 1.474(3)  |
| P1B  | N6B  | 1.680(9)  | N67_8  | C137_8 | 1.473(3)  |
| N4B  | C1B  | 1.493(11) | C17_8  | C27_8  | 1.524(2)  |
| N4B  | C7B  | 1.510(10) | C37_8  | C47_8  | 1.542(11) |
| N5B  | C2B  | 1.461(10) | C37_8  | C57_8  | 1.530(11) |
| N5B  | C3B  | 1.468(10) | C37_8  | C67_8  | 1.535(12) |
| N6B  | C11B | 1.459(11) | C77_8  | C87_8  | 1.527(12) |
| N6B  | C13B | 1.455(10) | C77_8  | C97_8  | 1.511(11) |
| C1B  | C2B  | 1.525(11) | C77_8  | C107_8 | 1.534(12) |
| C3B  | C4B  | 1.530(12) | C117_8 | C127_8 | 1.528(2)  |
| C3B  | C5B  | 1.516(12) | C137_8 | C147_8 | 1.529(2)  |
| C3B  | C6B  | 1.549(12) | N17_9  | P17_9  | 1.567(9)  |
| C7B  | C8B  | 1.530(12) | P17_9  | N47_9  | 1.673(9)  |
| C7B  | C9B  | 1.510(12) | P17_9  | N57_9  | 1.684(9)  |
| C7B  | C10B | 1.536(12) | P17_9  | N67_9  | 1.792(8)  |
| C11B | C12B | 1.536(13) | N47_9  | C17_9  | 1.460(12) |
| C13B | C14B | 1.521(13) | N47_9  | C77_9  | 1.492(11) |
| C303 | C304 | 1.527(3)  | N57_9  | C27_9  | 1.485(12) |
| C303 | C30D | 1.527(2)  | N57_9  | C37_9  | 1.485(11) |
| O1   | C91  | 1.396(9)  | N67_9  | C117_9 | 1.473(3)  |
| O1   | C93  | 1.421(10) | N67_9  | C137_9 | 1.474(3)  |
| C91  | C92  | 1.505(10) | C17_9  | C27_9  | 1.527(12) |
| C93  | C94' | 1.507(13) | C37_9  | C47_9  | 1.530(4)  |
| C93  | C94  | 1.493(16) | C37_9  | C57_9  | 1.531(12) |
| N1_1 | P1_1 | 1.577(5)  | C37_9  | C67_9  | 1.530(4)  |
| P1_1 | N2_1 | 1.702(3)  | C77_9  | C87_9  | 1.523(14) |
| P1_1 | N3_1 | 1.702(3)  | C77_9  | C97_9  | 1.534(13) |
| P1_1 | N4_1 | 1.677(8)  | C77_9  | C107_9 | 1.536(13) |
| N2_1 | C1_1 | 1.455(10) | C117_9 | C127_9 | 1.518(8)  |
| N2_1 | C7_1 | 1.489(10) | C137_9 | C147_9 | 1.518(8)  |
| N3_1 | C2_1 | 1.479(10) |        |        |           |

**Table S16.** Bond angles for 2-Ce<sup>III</sup>.

| Atom  | Atom | Atom  | Angle/°    | Atom  | Atom  | Atom  | Angle/°   |
|-------|------|-------|------------|-------|-------|-------|-----------|
| N2    | Ce1  | N3    | 114.24(19) | C11_1 | N4_1  | P1_1  | 123.7(7)  |
| N2    | Ce1  | Li1   | 124.4(3)   | C13_1 | N4_1  | P1_1  | 118.8(7)  |
| N2    | Ce1  | N1    | 113.8(2)   | C13_1 | N4_1  | C11_1 | 117.3(8)  |
| N2    | Ce1  | N1B   | 113.8(2)   | N2_1  | C1_1  | C2_1  | 105.3(7)  |
| N2    | Ce1  | N17_3 | 114.98(18) | N3_1  | C2_1  | C1_1  | 104.6(6)  |
| N2    | Ce1  | N17_4 | 114.98(18) | N3_1  | C3_1  | C4_1  | 110.6(9)  |
| N3    | Ce1  | Li1   | 41.4(3)    | N3_1  | C3_1  | C5_1  | 112.1(8)  |
| N3    | Ce1  | N17_3 | 82.93(19)  | N3_1  | C3_1  | C6_1  | 110.4(8)  |
| N3    | Ce1  | N17_4 | 82.93(19)  | C4_1  | C3_1  | C6_1  | 106.3(9)  |
| N1    | Ce1  | N3    | 113.5(2)   | C5_1  | C3_1  | C4_1  | 107.6(9)  |
| N1    | Ce1  | Li1   | 121.8(3)   | C5_1  | C3_1  | C6_1  | 109.6(9)  |
| N1    | Ce1  | N17_4 | 113.9(2)   | N2_1  | C7_1  | C8_1  | 110.2(9)  |
| N1B   | Ce1  | N3    | 113.5(2)   | N2_1  | C7_1  | C9_1  | 111.1(10) |
| N1B   | Ce1  | Li1   | 121.8(3)   | N2_1  | C7_1  | C10_1 | 109.9(8)  |
| N1B   | Ce1  | N17_3 | 113.9(2)   | C8_1  | C7_1  | C10_1 | 109.7(10) |
| N17_3 | Ce1  | Li1   | 41.6(3)    | C9_1  | C7_1  | C8_1  | 109.1(9)  |
| N17_4 | Ce1  | Li1   | 41.6(3)    | C9_1  | C7_1  | C10_1 | 106.9(10) |
| N9    | Ce2  | Li2   | 127.7(4)   | N4_1  | C11_1 | C12_1 | 113.3(9)  |
| N9    | Ce2  | N1_2  | 121.0(2)   | N4_1  | C13_1 | C14_1 | 113.6(9)  |
| N9    | Ce2  | N17_8 | 119.8(2)   | Li2   | N1_2  | Ce2   | 90.3(7)   |
| N9    | Ce2  | N17_9 | 115.8(2)   | P1_2  | N1_2  | Ce2   | 154.2(6)  |

|       |      |       |           |        |       |        |           |
|-------|------|-------|-----------|--------|-------|--------|-----------|
| N1_1  | Ce2  | N9    | 114.7(2)  | P1_2   | N1_2  | Li2    | 115.5(10) |
| N1_1  | Ce2  | Li2   | 44.6(5)   | N1_2   | P1_2  | N2_2   | 121.3(6)  |
| N1_1  | Ce2  | N17_7 | 112.6(2)  | N1_2   | P1_2  | N3_2   | 118.4(6)  |
| N1_1  | Ce2  | N17_8 | 81.0(2)   | N1_2   | P1_2  | N4_2   | 109.5(5)  |
| N1_2  | Ce2  | Li2   | 31.7(5)   | N2_2   | P1_2  | N3_2   | 93.0(5)   |
| N17_6 | Ce2  | N9    | 112.2(2)  | N2_2   | P1_2  | N4_2   | 106.5(6)  |
| N17_6 | Ce2  | Li2   | 120.1(4)  | N3_2   | P1_2  | N4_2   | 106.3(6)  |
| N17_6 | Ce2  | N1_2  | 116.0(2)  | C1_2   | N2_2  | P1_2   | 113.7(7)  |
| N17_6 | Ce2  | N17_9 | 109.1(2)  | C1_2   | N2_2  | C7_2   | 117.9(8)  |
| N17_7 | Ce2  | N9    | 112.2(2)  | C7_2   | N2_2  | P1_2   | 127.7(8)  |
| N17_7 | Ce2  | Li2   | 120.1(4)  | C2_2   | N3_2  | P1_2   | 109.4(7)  |
| N17_7 | Ce2  | N17_8 | 113.0(2)  | C3_2   | N3_2  | P1_2   | 125.4(8)  |
| N17_8 | Ce2  | Li2   | 36.4(5)   | C3_2   | N3_2  | C2_2   | 115.9(9)  |
| N17_9 | Ce2  | Li2   | 46.1(5)   | C11_2  | N4_2  | P1_2   | 119.9(8)  |
| N17_9 | Ce2  | N1_2  | 77.9(3)   | C11_2  | N4_2  | C13_2  | 119.4(9)  |
| N2    | P2   | N20   | 113.5(2)  | C13_2  | N4_2  | P1_2   | 118.3(8)  |
| N2    | P2   | N22   | 124.6(3)  | N2_2   | C1_2  | C2_2   | 107.5(9)  |
| N2    | P2   | N21'  | 126.6(6)  | N3_2   | C2_2  | C1_2   | 104.3(9)  |
| N20   | P2   | N22   | 107.2(2)  | N3_2   | C3_2  | C4_2   | 112.9(10) |
| N21'  | P2   | N20   | 103.4(5)  | N3_2   | C3_2  | C5_2   | 109.9(10) |
| P2    | N2   | Ce1   | 165.7(4)  | N3_2   | C3_2  | C6_2   | 109.7(10) |
| C201  | N20  | P2    | 118.3(4)  | C4_2   | C3_2  | C5_2   | 108.6(10) |
| C203  | N20  | P2    | 121.8(5)  | C4_2   | C3_2  | C6_2   | 108.2(10) |
| C203  | N20  | C201  | 114.7(6)  | C5_2   | C3_2  | C6_2   | 107.3(10) |
| N20   | C201 | C202  | 114.3(8)  | N2_2   | C7_2  | C8_2   | 111.7(11) |
| N20   | C203 | C204  | 113.6(8)  | N2_2   | C7_2  | C9_2   | 107.5(10) |
| C21   | N21  | P2    | 129.0(8)  | N2_2   | C7_2  | C10_2  | 111.8(10) |
| C23   | N21  | P2    | 117.7(6)  | C8_2   | C7_2  | C9_2   | 108.4(10) |
| C23   | N21  | C21   | 112.1(9)  | C10_2  | C7_2  | C8_2   | 108.0(11) |
| C22   | N22  | P2    | 118.4(8)  | C10_2  | C7_2  | C9_2   | 109.4(11) |
| C24   | N22  | P2    | 110.2(6)  | N4_2   | C11_2 | C12_2  | 114.8(12) |
| C24   | N22  | C22   | 112.6(9)  | N4_2   | C13_2 | C14_2  | 113.8(11) |
| N21   | C21  | C211  | 106.1(14) | Li1    | N17_3 | Ce1    | 86.0(4)   |
| N21   | C21  | C212  | 109.7(13) | P17_3  | N17_3 | Ce1    | 163.2(4)  |
| C212  | C21  | C211  | 109.1(16) | P17_3  | N17_3 | Li1    | 105.9(5)  |
| C213  | C21  | N21   | 111.9(12) | N17_3  | P17_3 | N47_3  | 106.1(5)  |
| C213  | C21  | C211  | 109.6(15) | N17_3  | P17_3 | N57_3  | 128.7(5)  |
| C213  | C21  | C212  | 110.4(16) | N17_3  | P17_3 | N67_3  | 111.0(5)  |
| N22   | C22  | C221  | 112.8(14) | N57_3  | P17_3 | N47_3  | 92.7(4)   |
| N22   | C22  | C222  | 108.9(12) | N67_3  | P17_3 | N47_3  | 110.7(5)  |
| N22   | C22  | C223  | 108.4(12) | N67_3  | P17_3 | N57_3  | 105.6(6)  |
| C222  | C22  | C221  | 108.7(15) | P17_3  | N47_3 | Li1    | 78.3(5)   |
| C222  | C22  | C223  | 111.2(13) | C17_3  | N47_3 | Li1    | 131.0(8)  |
| C223  | C22  | C221  | 106.8(16) | C17_3  | N47_3 | P17_3  | 110.5(6)  |
| N21   | C23  | C24   | 100.9(10) | C17_3  | N47_3 | C77_3  | 113.4(7)  |
| N22   | C24  | C23   | 105.4(11) | C77_3  | N47_3 | Li1    | 96.1(7)   |
| C21'  | N21' | P2    | 124.4(12) | C77_3  | N47_3 | P17_3  | 124.9(7)  |
| C21'  | N21' | C23'  | 123.4(14) | C27_3  | N57_3 | P17_3  | 111.5(6)  |
| C23'  | N21' | P2    | 111.3(10) | C27_3  | N57_3 | C37_3  | 115.2(7)  |
| C22'  | N22' | P2    | 124.0(10) | C37_3  | N57_3 | P17_3  | 123.8(6)  |
| C24'  | N22' | P2    | 108.2(10) | C117_3 | N67_3 | P17_3  | 126.5(7)  |
| C24'  | N22' | C22'  | 115.8(13) | C117_3 | N67_3 | C137_3 | 108.5(8)  |
| N21'  | C21' | C21A  | 113.3(16) | C137_3 | N67_3 | P17_3  | 120.1(7)  |
| N21'  | C21' | C21B  | 110.2(15) | N47_3  | C17_3 | C27_3  | 105.1(7)  |
| N21'  | C21' | C21C  | 109.8(15) | N57_3  | C27_3 | C17_3  | 104.1(7)  |
| C21B  | C21' | C21A  | 106.5(17) | N57_3  | C37_3 | C47_3  | 111.0(8)  |
| C21B  | C21' | C21C  | 110.7(16) | N57_3  | C37_3 | C57_3  | 109.9(7)  |
| C21C  | C21' | C21A  | 106.3(16) | N57_3  | C37_3 | C67_3  | 108.6(8)  |

|      |      |      |           |        |        |        |           |
|------|------|------|-----------|--------|--------|--------|-----------|
| N22' | C22' | C22A | 109.0(13) | C47_3  | C37_3  | C67_3  | 110.9(9)  |
| N22' | C22' | C22B | 109.6(14) | C57_3  | C37_3  | C47_3  | 108.4(8)  |
| N22' | C22' | C22C | 110.3(16) | C57_3  | C37_3  | C67_3  | 108.1(8)  |
| C22B | C22' | C22A | 106.4(16) | N47_3  | C77_3  | C87_3  | 110.1(9)  |
| C22B | C22' | C22C | 110.1(17) | N47_3  | C77_3  | C97_3  | 111.7(9)  |
| C22C | C22' | C22A | 111.3(15) | N47_3  | C77_3  | C107_3 | 111.0(9)  |
| N21' | C23' | C24' | 110.3(12) | C97_3  | C77_3  | C87_3  | 107.9(9)  |
| N22' | C24' | C23' | 106.4(13) | C107_3 | C77_3  | C87_3  | 107.5(9)  |
| N3   | P3   | N30  | 112.9(2)  | C107_3 | C77_3  | C97_3  | 108.6(9)  |
| N3   | P3   | N31  | 111.6(3)  | C77_3  | C107_3 | Li1    | 91.8(8)   |
| N3   | P3   | N32  | 121.8(3)  | N67_3  | C117_3 | C127_3 | 108.0(8)  |
| N30  | P3   | N31  | 111.8(3)  | N67_3  | C137_3 | C147_3 | 113.4(10) |
| N30  | P3   | N32  | 104.9(2)  | Li1    | N17_4  | Ce1    | 86.0(4)   |
| N31  | P3   | N32  | 92.0(3)   | P17_4  | N17_4  | Ce1    | 173.8(3)  |
| P3   | N3   | Ce1  | 173.2(3)  | P17_4  | N17_4  | Li1    | 98.3(5)   |
| P3   | N3   | Li1  | 98.5(5)   | N17_4  | P17_4  | N47_4  | 120.7(4)  |
| Li1  | N3   | Ce1  | 86.4(4)   | N17_4  | P17_4  | N57_4  | 113.0(4)  |
| C301 | N30  | P3   | 121.6(4)  | N17_4  | P17_4  | N67_4  | 115.4(3)  |
| C303 | N30  | P3   | 121.2(4)  | N47_4  | P17_4  | N57_4  | 92.6(3)   |
| C303 | N30  | C301 | 117.0(5)  | N67_4  | P17_4  | N47_4  | 108.5(3)  |
| N30  | C301 | C302 | 114.9(6)  | N67_4  | P17_4  | N57_4  | 103.1(3)  |
| P3   | N31  | Li1  | 75.3(4)   | P17_4  | N47_4  | Li1    | 70.4(4)   |
| C31  | N31  | P3   | 124.2(5)  | C17_4  | N47_4  | Li1    | 126.2(6)  |
| C31  | N31  | Li1  | 99.0(5)   | C17_4  | N47_4  | P17_4  | 113.2(4)  |
| C33  | N31  | P3   | 111.2(5)  | C17_4  | N47_4  | C77_4  | 115.6(5)  |
| C33  | N31  | C31  | 114.6(5)  | C77_4  | N47_4  | Li1    | 96.6(6)   |
| C33  | N31  | Li1  | 128.1(6)  | C77_4  | N47_4  | P17_4  | 126.4(4)  |
| C32  | N32  | P3   | 124.1(4)  | C27_4  | N57_4  | P17_4  | 112.9(4)  |
| C34  | N32  | P3   | 111.4(4)  | C27_4  | N57_4  | C37_4  | 119.9(6)  |
| C34  | N32  | C32  | 119.7(4)  | C37_4  | N57_4  | P17_4  | 124.8(6)  |
| N31  | C31  | C311 | 110.3(6)  | C117_4 | N67_4  | P17_4  | 116.3(5)  |
| N31  | C31  | C312 | 109.0(7)  | C137_4 | N67_4  | P17_4  | 120.6(5)  |
| N31  | C31  | C313 | 113.3(7)  | C137_4 | N67_4  | C117_4 | 120.4(6)  |
| C312 | C31  | C311 | 106.0(7)  | N47_4  | C17_4  | C27_4  | 106.9(5)  |
| C313 | C31  | C311 | 109.0(8)  | N57_4  | C27_4  | C17_4  | 106.4(6)  |
| C313 | C31  | C312 | 108.9(7)  | N57_4  | C37_4  | C47_4  | 109.3(7)  |
| N32  | C32  | C321 | 113.0(6)  | N57_4  | C37_4  | C57_4  | 111.5(7)  |
| N32  | C32  | C322 | 107.9(6)  | N57_4  | C37_4  | C67_4  | 110.9(7)  |
| N32  | C32  | C323 | 108.7(7)  | C57_4  | C37_4  | C47_4  | 107.2(8)  |
| C321 | C32  | C322 | 108.2(7)  | C67_4  | C37_4  | C47_4  | 110.2(8)  |
| C323 | C32  | C321 | 109.0(7)  | C67_4  | C37_4  | C57_4  | 107.7(8)  |
| C323 | C32  | C322 | 110.1(10) | N47_4  | C77_4  | C87_4  | 111.3(7)  |
| N31  | C33  | C34  | 104.5(5)  | N47_4  | C77_4  | C97_4  | 110.0(6)  |
| N32  | C34  | C33  | 107.1(5)  | N47_4  | C77_4  | C107_4 | 109.1(7)  |
| N9   | P5   | N50  | 113.4(3)  | C87_4  | C77_4  | C97_4  | 108.9(8)  |
| N9   | P5   | N51  | 120.9(3)  | C87_4  | C77_4  | C107_4 | 109.0(7)  |
| N9   | P5   | N52  | 119.8(3)  | C107_4 | C77_4  | C97_4  | 108.6(7)  |
| N50  | P5   | N51  | 103.9(3)  | N67_4  | C117_4 | C127_4 | 114.1(7)  |
| N50  | P5   | N52  | 104.6(3)  | N67_4  | C137_4 | C147_4 | 114.5(6)  |
| N52  | P5   | N51  | 90.9(3)   | P17_6  | N17_6  | Ce2    | 160.2(4)  |
| P5   | N9   | Ce2  | 172.2(4)  | N17_6  | P17_6  | N47_6  | 125.6(6)  |
| C501 | N50  | P5   | 121.9(5)  | N17_6  | P17_6  | N57_6  | 120.8(5)  |
| C501 | N50  | C503 | 116.7(6)  | N17_6  | P17_6  | N67_6  | 108.5(5)  |
| C503 | N50  | P5   | 121.3(4)  | N47_6  | P17_6  | N57_6  | 90.8(5)   |
| C51  | N51  | P5   | 121.7(4)  | N67_6  | P17_6  | N47_6  | 104.2(6)  |
| C53  | N51  | P5   | 109.2(4)  | N67_6  | P17_6  | N57_6  | 103.9(6)  |
| C53  | N51  | C51  | 114.3(5)  | C17_6  | N47_6  | P17_6  | 114.4(6)  |
| C52  | N52  | P5   | 125.9(4)  | C17_6  | N47_6  | C77_6  | 118.2(8)  |

|       |      |       |           |        |        |        |           |
|-------|------|-------|-----------|--------|--------|--------|-----------|
| C54   | N52  | P5    | 114.6(4)  | C77_6  | N47_6  | P17_6  | 125.7(8)  |
| C54   | N52  | C52   | 118.9(5)  | C27_6  | N57_6  | P17_6  | 108.6(7)  |
| N51   | C51  | C511  | 108.2(4)  | C37_6  | N57_6  | P17_6  | 122.7(7)  |
| N51   | C51  | C512  | 108.0(5)  | C37_6  | N57_6  | C27_6  | 114.7(8)  |
| N51   | C51  | C513  | 111.6(4)  | C117_6 | N67_6  | P17_6  | 119.5(9)  |
| C511  | C51  | C512  | 108.7(4)  | C137_6 | N67_6  | P17_6  | 120.7(9)  |
| C511  | C51  | C513  | 109.5(5)  | C137_6 | N67_6  | C117_6 | 119.1(10) |
| C512  | C51  | C513  | 110.9(6)  | N47_6  | C17_6  | C27_6  | 107.2(8)  |
| N52   | C52  | C521  | 111.5(4)  | N57_6  | C27_6  | C17_6  | 103.1(8)  |
| N52   | C52  | C522  | 109.4(4)  | N57_6  | C37_6  | C47_6  | 111.1(8)  |
| N52   | C52  | C523  | 109.4(4)  | N57_6  | C37_6  | C57_6  | 109.6(8)  |
| C522  | C52  | C521  | 108.4(5)  | N57_6  | C37_6  | C67_6  | 110.1(8)  |
| C523  | C52  | C521  | 108.2(6)  | C57_6  | C37_6  | C47_6  | 107.8(9)  |
| C523  | C52  | C522  | 109.9(6)  | C67_6  | C37_6  | C47_6  | 109.1(9)  |
| N51   | C53  | C54   | 104.3(6)  | C67_6  | C37_6  | C57_6  | 109.1(9)  |
| N52   | C54  | C53   | 106.7(6)  | N47_6  | C77_6  | C87_6  | 109.2(10) |
| N50   | C501 | C502  | 114.1(6)  | N47_6  | C77_6  | C97_6  | 108.7(10) |
| N50   | C503 | C504  | 114.8(7)  | N47_6  | C77_6  | C107_6 | 110.7(9)  |
| N3    | Li1  | N31   | 71.4(5)   | C87_6  | C77_6  | C97_6  | 109.0(10) |
| N3    | Li1  | N17_3 | 104.6(5)  | C107_6 | C77_6  | C87_6  | 110.7(10) |
| N3    | Li1  | N47_3 | 171.3(7)  | C107_6 | C77_6  | C97_6  | 108.4(10) |
| N3    | Li1  | N17_4 | 104.6(5)  | N67_6  | C117_6 | C127_6 | 112.7(11) |
| N3    | Li1  | P17_4 | 138.0(6)  | N67_6  | C137_6 | C147_6 | 115.3(12) |
| N31   | Li1  | N47_3 | 117.3(5)  | P17_7  | N17_7  | Ce2    | 172.5(4)  |
| N31   | Li1  | P17_4 | 149.3(6)  | N17_7  | P17_7  | N47_7  | 116.5(5)  |
| N17_3 | Li1  | N31   | 164.6(7)  | N17_7  | P17_7  | N57_7  | 117.3(4)  |
| N17_3 | Li1  | N47_3 | 66.7(5)   | N17_7  | P17_7  | N67_7  | 117.6(4)  |
| N17_4 | Li1  | N31   | 164.6(7)  | N47_7  | P17_7  | N57_7  | 90.6(3)   |
| N17_4 | Li1  | P17_4 | 33.6(3)   | N67_7  | P17_7  | N47_7  | 104.5(4)  |
| N1_1  | Li2  | N3_1  | 72.1(7)   | N67_7  | P17_7  | N57_7  | 106.4(4)  |
| N1_2  | Li2  | P1_2  | 32.1(6)   | C17_7  | N47_7  | P17_7  | 115.2(5)  |
| N1_2  | Li2  | N17_9 | 109.0(10) | C17_7  | N47_7  | C77_7  | 116.9(7)  |
| N17_8 | Li2  | N1_1  | 104.1(8)  | C77_7  | N47_7  | P17_7  | 126.6(6)  |
| N17_8 | Li2  | N3_1  | 170.1(10) | C27_7  | N57_7  | P17_7  | 111.9(5)  |
| N17_9 | Li2  | P1_2  | 141.0(9)  | C27_7  | N57_7  | C37_7  | 116.6(5)  |
| P1    | N1   | Ce1   | 166.8(4)  | C37_7  | N57_7  | P17_7  | 123.7(5)  |
| N1    | P1   | N4    | 117.4(5)  | C117_7 | N67_7  | P17_7  | 120.2(6)  |
| N1    | P1   | N5    | 117.5(5)  | C137_7 | N67_7  | P17_7  | 120.4(6)  |
| N1    | P1   | N6    | 114.9(4)  | C137_7 | N67_7  | C117_7 | 119.4(7)  |
| N4    | P1   | N5    | 92.2(3)   | N47_7  | C17_7  | C27_7  | 107.3(6)  |
| N6    | P1   | N4    | 108.5(3)  | N57_7  | C27_7  | C17_7  | 105.5(6)  |
| N6    | P1   | N5    | 103.5(4)  | N57_7  | C37_7  | C47_7  | 110.9(8)  |
| C1    | N4   | P1    | 112.1(4)  | N57_7  | C37_7  | C57_7  | 110.8(7)  |
| C1    | N4   | C7    | 115.9(5)  | N57_7  | C37_7  | C67_7  | 106.9(8)  |
| C7    | N4   | P1    | 126.5(4)  | C47_7  | C37_7  | C57_7  | 108.7(8)  |
| C2    | N5   | P1    | 113.7(4)  | C47_7  | C37_7  | C67_7  | 111.2(9)  |
| C2    | N5   | C3    | 120.4(6)  | C57_7  | C37_7  | C67_7  | 108.2(8)  |
| C3    | N5   | P1    | 125.1(5)  | N47_7  | C77_7  | C87_7  | 110.4(8)  |
| C11   | N6   | P1    | 117.2(5)  | N47_7  | C77_7  | C97_7  | 109.1(8)  |
| C13   | N6   | P1    | 121.3(5)  | N47_7  | C77_7  | C107_7 | 111.0(8)  |
| C13   | N6   | C11   | 121.0(6)  | C97_7  | C77_7  | C87_7  | 109.8(9)  |
| N4    | C1   | C2    | 106.6(5)  | C97_7  | C77_7  | C107_7 | 108.2(9)  |
| N5    | C2   | C1    | 107.3(5)  | C107_7 | C77_7  | C87_7  | 108.3(8)  |
| N5    | C3   | C4    | 109.4(7)  | N67_7  | C117_7 | C127_7 | 111.4(8)  |
| N5    | C3   | C5    | 111.6(7)  | N67_7  | C137_7 | C147_7 | 112.1(8)  |
| N5    | C3   | C6    | 110.8(7)  | Li2    | N17_8  | Ce2    | 89.2(7)   |
| C5    | C3   | C4    | 107.2(8)  | P17_8  | N17_8  | Ce2    | 150.0(4)  |
| C6    | C3   | C4    | 110.1(8)  | P17_8  | N17_8  | Li2    | 120.8(8)  |

|      |      |      |           |        |        |        |           |
|------|------|------|-----------|--------|--------|--------|-----------|
| C6   | C3   | C5   | 107.6(8)  | N17_8  | P17_8  | N47_8  | 120.2(5)  |
| N4   | C7   | C8   | 111.4(6)  | N17_8  | P17_8  | N57_8  | 101.1(4)  |
| N4   | C7   | C9   | 110.1(6)  | N17_8  | P17_8  | N67_8  | 124.4(4)  |
| N4   | C7   | C10  | 109.2(7)  | N57_8  | P17_8  | N47_8  | 93.2(3)   |
| C8   | C7   | C9   | 108.8(8)  | N67_8  | P17_8  | N47_8  | 105.2(4)  |
| C8   | C7   | C10  | 108.8(7)  | N67_8  | P17_8  | N57_8  | 107.0(3)  |
| C10  | C7   | C9   | 108.4(7)  | C17_8  | N47_8  | P17_8  | 111.0(5)  |
| N6   | C11  | C12  | 114.3(7)  | C17_8  | N47_8  | C77_8  | 115.7(6)  |
| N6   | C13  | C14  | 114.6(7)  | C77_8  | N47_8  | P17_8  | 121.6(6)  |
| P1B  | N1B  | Ce1  | 170.6(5)  | C27_8  | N57_8  | P17_8  | 112.2(4)  |
| N1B  | P1B  | N4B  | 122.7(6)  | C37_8  | N57_8  | P17_8  | 126.0(5)  |
| N1B  | P1B  | N5B  | 122.0(6)  | C37_8  | N57_8  | C27_8  | 118.5(6)  |
| N1B  | P1B  | N6B  | 109.5(6)  | C117_8 | N67_8  | P17_8  | 121.5(6)  |
| N5B  | P1B  | N4B  | 90.9(4)   | C137_8 | N67_8  | P17_8  | 123.3(6)  |
| N6B  | P1B  | N4B  | 102.9(6)  | C137_8 | N67_8  | C117_8 | 113.3(7)  |
| N6B  | P1B  | N5B  | 106.0(6)  | N47_8  | C17_8  | C27_8  | 106.1(7)  |
| C1B  | N4B  | P1B  | 106.0(6)  | N57_8  | C27_8  | C17_8  | 106.0(7)  |
| C1B  | N4B  | C7B  | 114.2(8)  | N57_8  | C37_8  | C47_8  | 110.9(9)  |
| C7B  | N4B  | P1B  | 117.9(7)  | N57_8  | C37_8  | C57_8  | 111.9(8)  |
| C2B  | N5B  | P1B  | 113.9(6)  | N57_8  | C37_8  | C67_8  | 111.4(8)  |
| C2B  | N5B  | C3B  | 117.3(7)  | C57_8  | C37_8  | C47_8  | 107.1(8)  |
| C3B  | N5B  | P1B  | 128.8(7)  | C57_8  | C37_8  | C67_8  | 107.1(9)  |
| C11B | N6B  | P1B  | 122.4(8)  | C67_8  | C37_8  | C47_8  | 108.2(8)  |
| C13B | N6B  | P1B  | 120.5(8)  | N47_8  | C77_8  | C87_8  | 111.0(8)  |
| C13B | N6B  | C11B | 117.1(9)  | N47_8  | C77_8  | C107_8 | 108.8(8)  |
| N4B  | C1B  | C2B  | 102.3(7)  | C87_8  | C77_8  | C107_8 | 107.2(8)  |
| N5B  | C2B  | C1B  | 104.9(7)  | C97_8  | C77_8  | N47_8  | 109.6(8)  |
| N5B  | C3B  | C4B  | 110.4(9)  | C97_8  | C77_8  | C87_8  | 110.4(9)  |
| N5B  | C3B  | C5B  | 112.4(9)  | C97_8  | C77_8  | C107_8 | 109.8(9)  |
| N5B  | C3B  | C6B  | 109.2(9)  | N67_8  | C117_8 | C127_8 | 109.1(7)  |
| C4B  | C3B  | C6B  | 107.8(10) | N67_8  | C137_8 | C147_8 | 110.5(7)  |
| C5B  | C3B  | C4B  | 109.2(10) | Li2    | N17_9  | Ce2    | 82.9(6)   |
| C5B  | C3B  | C6B  | 107.7(10) | P17_9  | N17_9  | Ce2    | 177.3(5)  |
| N4B  | C7B  | C8B  | 110.6(8)  | P17_9  | N17_9  | Li2    | 95.7(8)   |
| N4B  | C7B  | C9B  | 108.8(9)  | N17_9  | P17_9  | N47_9  | 123.4(6)  |
| N4B  | C7B  | C10B | 109.5(9)  | N17_9  | P17_9  | N57_9  | 126.2(6)  |
| C8B  | C7B  | C10B | 108.0(9)  | N17_9  | P17_9  | N67_9  | 104.2(4)  |
| C9B  | C7B  | C8B  | 111.0(9)  | N47_9  | P17_9  | N57_9  | 94.1(5)   |
| C9B  | C7B  | C10B | 109.0(9)  | N47_9  | P17_9  | N67_9  | 103.3(6)  |
| N6B  | C11B | C12B | 111.4(11) | N57_9  | P17_9  | N67_9  | 102.2(6)  |
| N6B  | C13B | C14B | 114.4(11) | C17_9  | N47_9  | P17_9  | 112.9(7)  |
| N30  | C303 | C304 | 114.7(9)  | C17_9  | N47_9  | C77_9  | 117.4(8)  |
| N30  | C303 | C30D | 118.4(8)  | C77_9  | N47_9  | P17_9  | 129.5(8)  |
| C91  | O1   | C93  | 111.0(7)  | C27_9  | N57_9  | P17_9  | 111.8(7)  |
| O1   | C91  | C92  | 109.2(7)  | C27_9  | N57_9  | C37_9  | 114.6(8)  |
| O1   | C93  | C94' | 110.8(11) | C37_9  | N57_9  | P17_9  | 125.8(7)  |
| O1   | C93  | C94  | 109.6(13) | C117_9 | N67_9  | P17_9  | 111.5(7)  |
| Li2  | N1_1 | Ce2  | 85.6(6)   | C117_9 | N67_9  | C137_9 | 116.1(9)  |
| P1_1 | N1_1 | Ce2  | 179.5(4)  | C137_9 | N67_9  | P17_9  | 109.1(7)  |
| P1_1 | N1_1 | Li2  | 94.7(7)   | N47_9  | C17_9  | C27_9  | 106.9(8)  |
| N1_1 | P1_1 | N2_1 | 121.0(4)  | N57_9  | C27_9  | C17_9  | 105.1(8)  |
| N1_1 | P1_1 | N3_1 | 114.8(4)  | N57_9  | C37_9  | C47_9  | 111.1(9)  |
| N1_1 | P1_1 | N4_1 | 114.5(4)  | N57_9  | C37_9  | C57_9  | 108.7(9)  |
| N2_1 | P1_1 | N3_1 | 92.2(4)   | N57_9  | C37_9  | C67_9  | 111.2(9)  |
| N4_1 | P1_1 | N2_1 | 104.0(4)  | C47_9  | C37_9  | C57_9  | 108.9(9)  |
| N4_1 | P1_1 | N3_1 | 107.5(4)  | C47_9  | C37_9  | C67_9  | 108.6(9)  |
| C1_1 | N2_1 | P1_1 | 111.1(5)  | C67_9  | C37_9  | C57_9  | 108.3(9)  |
| C1_1 | N2_1 | C7_1 | 116.5(6)  | N47_9  | C77_9  | C87_9  | 113.5(11) |

|      |      |      |          |       |        |        |           |
|------|------|------|----------|-------|--------|--------|-----------|
| C7_1 | N2_1 | P1_1 | 125.6(6) | N47_9 | C77_9  | C97_9  | 110.0(10) |
| P1_1 | N3_1 | Li2  | 76.4(5)  | N47_9 | C77_9  | C107_9 | 109.7(10) |
| C2_1 | N3_1 | Li2  | 120.8(8) | C87_9 | C77_9  | C97_9  | 107.3(10) |
| C2_1 | N3_1 | P1_1 | 112.8(5) | C87_9 | C77_9  | C107_9 | 108.5(10) |
| C3_1 | N3_1 | Li2  | 96.0(7)  | C97_9 | C77_9  | C107_9 | 107.7(10) |
| C3_1 | N3_1 | P1_1 | 128.8(6) | N67_9 | C117_9 | C127_9 | 112.5(9)  |
| C3_1 | N3_1 | C2_1 | 114.1(6) | N67_9 | C137_9 | C147_9 | 111.9(10) |

**Table S17.** Bond lengths for 2-Ce<sup>Na</sup>.

| Atom | Atom | Length/Å   | Atom | Atom | Length/Å   |
|------|------|------------|------|------|------------|
| Ce1  | N1A  | 2.3594(12) | C41A | C42A | 1.520(3)   |
| Ce1  | N2A  | 2.3850(13) | C39A | C40A | 1.514(3)   |
| Ce1  | N4A  | 2.3069(13) | P1B  | N1B  | 1.5298(15) |
| Ce1  | N3A  | 2.2864(13) | P1B  | N5B  | 1.7167(14) |
| Ce1  | N1B  | 2.3594(12) | P1B  | N6B  | 1.7163(14) |
| Ce1  | N4B  | 2.3069(13) | P1B  | N7B  | 1.6733(16) |
| Ce1  | N3B  | 2.2864(13) | N1B  | Na1B | 2.368(6)   |
| Na1A | N1A  | 2.404(6)   | N5B  | C1B  | 1.457(2)   |
| Na1A | N5A  | 2.692(6)   | N5B  | C7B  | 1.4769(18) |
| Na1A | N2A  | 2.362(6)   | N5B  | Na1B | 2.743(6)   |
| Na1A | N8A  | 2.672(6)   | N6B  | C2B  | 1.450(2)   |
| P1A  | N1A  | 1.5347(15) | N6B  | C3B  | 1.4902(18) |
| P1A  | N5A  | 1.7131(14) | N7B  | C13B | 1.462(2)   |
| P1A  | N6A  | 1.7155(14) | N7B  | C11B | 1.470(2)   |
| P1A  | N7A  | 1.6752(16) | C1B  | C2B  | 1.510(3)   |
| N5A  | C1A  | 1.459(2)   | C7B  | C10B | 1.529(2)   |
| N5A  | C7A  | 1.4798(18) | C7B  | C8B  | 1.547(2)   |
| N6A  | C2A  | 1.452(2)   | C7B  | C9B  | 1.532(2)   |
| N6A  | C3A  | 1.4881(18) | C3B  | C4B  | 1.543(3)   |
| N7A  | C13A | 1.462(2)   | C3B  | C5B  | 1.524(2)   |
| N7A  | C11A | 1.471(2)   | C3B  | C6B  | 1.506(2)   |
| C1A  | C2A  | 1.510(3)   | C13B | C14B | 1.520(3)   |
| C7A  | C8A  | 1.525(2)   | C11B | C12B | 1.514(3)   |
| C7A  | C9A  | 1.548(2)   | P2B  | N2B  | 1.5315(15) |
| C7A  | C10A | 1.532(2)   | P2B  | N8B  | 1.7149(14) |
| C3A  | C4A  | 1.543(3)   | P2B  | N9B  | 1.7151(14) |
| C3A  | C5A  | 1.524(2)   | P2B  | N10B | 1.6741(16) |
| C3A  | C6A  | 1.507(2)   | N2B  | Na1B | 2.402(6)   |
| C13A | C14A | 1.521(3)   | N8B  | C15B | 1.463(2)   |
| C11A | C12A | 1.514(3)   | N8B  | C21B | 1.4775(18) |
| P2A  | N2A  | 1.5306(16) | N9B  | C16B | 1.453(2)   |
| P2A  | N8A  | 1.7190(15) | N9B  | C17B | 1.4825(18) |
| P2A  | N9A  | 1.7107(15) | N10B | C27B | 1.458(2)   |
| P2A  | N10A | 1.6780(17) | N10B | C25B | 1.469(2)   |
| N8A  | C15A | 1.465(2)   | C15B | C16B | 1.506(3)   |
| N8A  | C21A | 1.4777(19) | C21B | C22B | 1.523(2)   |
| N9A  | C16A | 1.447(2)   | C21B | C23B | 1.549(2)   |
| N9A  | C17A | 1.4766(19) | C21B | C24B | 1.535(2)   |
| N10A | C27A | 1.460(2)   | C17B | C18B | 1.547(3)   |
| N10A | C25A | 1.470(2)   | C17B | C19B | 1.521(3)   |
| C15A | C16A | 1.509(3)   | C17B | C20B | 1.511(2)   |
| C21A | C22A | 1.525(3)   | C27B | C28B | 1.518(3)   |
| C21A | C23A | 1.550(2)   | C25B | C26B | 1.513(3)   |
| C21A | C24A | 1.534(2)   | P4B  | N4B  | 1.5258(15) |
| C17A | C18A | 1.547(3)   | P4B  | N15B | 1.7196(14) |
| C17A | C19A | 1.524(3)   | P4B  | N14B | 1.7087(14) |
| C17A | C20A | 1.511(3)   | P4B  | N16B | 1.6813(16) |

|      |      |            |       |       |            |
|------|------|------------|-------|-------|------------|
| C27A | C28A | 1.518(3)   | N15B  | C44B  | 1.462(2)   |
| C25A | C26A | 1.514(3)   | N15B  | C45B  | 1.4817(18) |
| P4A  | N4A  | 1.5261(16) | N14B  | C43B  | 1.437(2)   |
| P4A  | N15A | 1.7158(15) | N14B  | C49B  | 1.4724(18) |
| P4A  | N14A | 1.7101(15) | N16B  | C55B  | 1.457(2)   |
| P4A  | N16A | 1.6836(17) | N16B  | C53B  | 1.470(2)   |
| N15A | C44A | 1.460(2)   | C44B  | C43B  | 1.510(3)   |
| N15A | C45A | 1.4801(19) | C45B  | C46B  | 1.528(2)   |
| N14A | C43A | 1.441(2)   | C45B  | C47B  | 1.545(2)   |
| N14A | C49A | 1.4753(19) | C45B  | C48B  | 1.529(2)   |
| N16A | C55A | 1.458(2)   | C49B  | C52B  | 1.550(3)   |
| N16A | C53A | 1.469(2)   | C49B  | C50B  | 1.526(3)   |
| C44A | C43A | 1.509(3)   | C49B  | C51B  | 1.511(3)   |
| C45A | C46A | 1.528(2)   | C55B  | C56B  | 1.523(3)   |
| C45A | C47A | 1.545(2)   | C53B  | C54B  | 1.512(3)   |
| C45A | C48A | 1.530(2)   | P3B   | N3B   | 1.5254(15) |
| C49A | C52A | 1.549(3)   | P3B   | N12B  | 1.7123(14) |
| C49A | C50A | 1.525(3)   | P3B   | N11B  | 1.7091(14) |
| C49A | C51A | 1.511(3)   | P3B   | N13B  | 1.6864(16) |
| C55A | C56A | 1.521(3)   | N12B  | C30B  | 1.461(2)   |
| C53A | C54A | 1.513(3)   | N12B  | C31B  | 1.4778(18) |
| P3A  | N3A  | 1.5276(16) | N11B  | C29B  | 1.437(2)   |
| P3A  | N12A | 1.7183(15) | N11B  | C35B  | 1.4703(18) |
| P3A  | N11A | 1.7058(14) | N13B  | C41B  | 1.460(2)   |
| P3A  | N13A | 1.6819(17) | N13B  | C39B  | 1.470(2)   |
| N12A | C30A | 1.463(2)   | C30B  | C29B  | 1.510(3)   |
| N12A | C31A | 1.4793(19) | C31B  | C32B  | 1.529(2)   |
| N11A | C29A | 1.436(2)   | C31B  | C33B  | 1.545(2)   |
| N11A | C35A | 1.4688(19) | C31B  | C34B  | 1.531(2)   |
| N13A | C41A | 1.458(2)   | C35B  | C36B  | 1.549(3)   |
| N13A | C39A | 1.468(2)   | C35B  | C37B  | 1.528(3)   |
| C30A | C29A | 1.508(3)   | C35B  | C38B  | 1.512(3)   |
| C31A | C32A | 1.529(2)   | C41B  | C42B  | 1.520(3)   |
| C31A | C33A | 1.544(2)   | C39B  | C40B  | 1.512(3)   |
| C31A | C34A | 1.530(2)   | O1S_1 | C2S_1 | 1.419(2)   |
| C35A | C38A | 1.550(3)   | O1S_1 | C3S_1 | 1.4191(19) |
| C35A | C36A | 1.525(2)   | C1S_1 | C2S_1 | 1.519(2)   |
| C35A | C37A | 1.515(2)   | C3S_1 | C4S_1 | 1.518(2)   |

**Table S18.** Bond angles for 2-CeNa.

| Atom | Atom | Atom | Angle/°    | Atom | Atom | Atom | Angle/°    |
|------|------|------|------------|------|------|------|------------|
| N1A  | Ce1  | N2A  | 89.99(6)   | N11A | C35A | C37A | 110.5(2)   |
| N4A  | Ce1  | N1B  | 113.59(7)  | C36A | C35A | C38A | 107.0(2)   |
| N3A  | Ce1  | N4A  | 110.47(7)  | C37A | C35A | C38A | 108.4(2)   |
| N3A  | Ce1  | N1B  | 110.23(6)  | C37A | C35A | C36A | 109.5(2)   |
| N4B  | Ce1  | N1A  | 113.59(7)  | N13A | C41A | C42A | 113.4(3)   |
| N4B  | Ce1  | N2A  | 117.21(7)  | N13A | C39A | C40A | 114.5(3)   |
| N3B  | Ce1  | N1A  | 110.23(6)  | N1B  | P1B  | N5B  | 115.82(12) |
| N3B  | Ce1  | N2A  | 113.82(7)  | N1B  | P1B  | N6B  | 119.00(12) |
| N3B  | Ce1  | N4B  | 110.47(7)  | N1B  | P1B  | N7B  | 113.53(11) |
| N1A  | Na1A | N5A  | 65.25(13)  | N6B  | P1B  | N5B  | 92.04(9)   |
| N1A  | Na1A | N8A  | 153.2(3)   | N7B  | P1B  | N5B  | 108.15(11) |
| N2A  | Na1A | N1A  | 89.5(2)    | N7B  | P1B  | N6B  | 105.92(11) |
| N2A  | Na1A | N5A  | 154.5(3)   | Ce1  | N1B  | Na1B | 90.98(14)  |
| N2A  | Na1A | N8A  | 65.40(13)  | P1B  | N1B  | Ce1  | 173.94(12) |
| N8A  | Na1A | N5A  | 140.1(3)   | P1B  | N1B  | Na1B | 95.00(17)  |
| N1A  | P1A  | N5A  | 116.12(14) | P1B  | N5B  | Na1B | 78.41(16)  |
| N1A  | P1A  | N6A  | 119.72(14) | C1B  | N5B  | P1B  | 111.79(13) |



|      |      |      |            |      |      |      |            |
|------|------|------|------------|------|------|------|------------|
| N1A  | P1A  | N7A  | 112.57(13) | C1B  | N5B  | C7B  | 117.84(15) |
| N5A  | P1A  | N6A  | 92.13(10)  | C1B  | N5B  | Na1B | 114.0(3)   |
| N7A  | P1A  | N5A  | 108.33(13) | C7B  | N5B  | P1B  | 124.79(14) |
| N7A  | P1A  | N6A  | 105.79(13) | C7B  | N5B  | Na1B | 101.2(2)   |
| Ce1  | N1A  | Na1A | 89.98(14)  | C2B  | N6B  | P1B  | 111.62(13) |
| P1A  | N1A  | Ce1  | 173.85(14) | C2B  | N6B  | C3B  | 117.40(17) |
| P1A  | N1A  | Na1A | 94.76(17)  | C3B  | N6B  | P1B  | 121.39(14) |
| P1A  | N5A  | Na1A | 81.05(17)  | C13B | N7B  | P1B  | 120.90(15) |
| C1A  | N5A  | Na1A | 120.4(3)   | C13B | N7B  | C11B | 116.11(17) |
| C1A  | N5A  | P1A  | 111.89(14) | C11B | N7B  | P1B  | 122.28(16) |
| C1A  | N5A  | C7A  | 116.81(17) | N5B  | C1B  | C2B  | 105.91(16) |
| C7A  | N5A  | Na1A | 95.7(2)    | N6B  | C2B  | C1B  | 105.78(17) |
| C7A  | N5A  | P1A  | 124.45(16) | N5B  | C7B  | C10B | 111.15(17) |
| C2A  | N6A  | P1A  | 111.64(15) | N5B  | C7B  | C8B  | 109.92(17) |
| C2A  | N6A  | C3A  | 117.62(18) | N5B  | C7B  | C9B  | 111.08(17) |
| C3A  | N6A  | P1A  | 122.12(15) | C10B | C7B  | C8B  | 107.56(17) |
| C13A | N7A  | P1A  | 120.48(17) | C10B | C7B  | C9B  | 108.65(18) |
| C13A | N7A  | C11A | 115.7(2)   | C9B  | C7B  | C8B  | 108.38(18) |
| C11A | N7A  | P1A  | 122.50(18) | N6B  | C3B  | C4B  | 109.15(17) |
| N5A  | C1A  | C2A  | 105.90(18) | N6B  | C3B  | C5B  | 110.09(17) |
| N6A  | C2A  | C1A  | 105.82(18) | N6B  | C3B  | C6B  | 110.29(17) |
| N5A  | C7A  | C8A  | 110.84(19) | C5B  | C3B  | C4B  | 107.95(15) |
| N5A  | C7A  | C9A  | 109.62(19) | C6B  | C3B  | C4B  | 109.23(16) |
| N5A  | C7A  | C10A | 111.31(19) | C6B  | C3B  | C5B  | 110.09(16) |
| C8A  | C7A  | C9A  | 107.8(2)   | N7B  | C13B | C14B | 113.9(2)   |
| C8A  | C7A  | C10A | 108.9(2)   | N7B  | C11B | C12B | 116.0(2)   |
| C10A | C7A  | C9A  | 108.2(2)   | N2B  | P2B  | N8B  | 115.92(13) |
| C7A  | C8A  | Na1A | 80.6(2)    | N2B  | P2B  | N9B  | 118.98(13) |
| N6A  | C3A  | C4A  | 109.08(19) | N2B  | P2B  | N10B | 113.44(12) |
| N6A  | C3A  | C5A  | 110.66(19) | N8B  | P2B  | N9B  | 91.99(9)   |
| N6A  | C3A  | C6A  | 110.02(19) | N10B | P2B  | N8B  | 108.58(13) |
| C5A  | C3A  | C4A  | 107.5(2)   | N10B | P2B  | N9B  | 105.57(13) |
| C6A  | C3A  | C4A  | 109.3(2)   | Ce1  | N2B  | Na1B | 89.53(15)  |
| C6A  | C3A  | C5A  | 110.2(2)   | P2B  | N2B  | Ce1  | 170.17(14) |
| N7A  | C13A | C14A | 113.4(2)   | P2B  | N2B  | Na1B | 94.37(18)  |
| N7A  | C11A | C12A | 114.7(2)   | C15B | N8B  | P2B  | 111.89(14) |
| N2A  | P2A  | N8A  | 114.29(16) | C15B | N8B  | C21B | 116.83(17) |
| N2A  | P2A  | N9A  | 121.66(16) | C21B | N8B  | P2B  | 125.61(16) |
| N2A  | P2A  | N10A | 112.37(14) | C16B | N9B  | P2B  | 111.36(15) |
| N9A  | P2A  | N8A  | 91.52(11)  | C16B | N9B  | C17B | 117.32(18) |
| N10A | P2A  | N8A  | 110.18(15) | C17B | N9B  | P2B  | 122.85(15) |
| N10A | P2A  | N9A  | 104.76(15) | C27B | N10B | P2B  | 121.30(17) |
| Na1A | N2A  | Ce1  | 90.37(15)  | C27B | N10B | C25B | 116.33(19) |
| P2A  | N2A  | Ce1  | 170.71(15) | C25B | N10B | P2B  | 122.22(17) |
| P2A  | N2A  | Na1A | 95.02(18)  | N8B  | C15B | C16B | 105.94(18) |
| P2A  | N8A  | Na1A | 80.34(17)  | N9B  | C16B | C15B | 105.47(18) |
| C15A | N8A  | Na1A | 117.5(3)   | N8B  | C21B | C22B | 111.66(18) |
| C15A | N8A  | P2A  | 111.85(16) | N8B  | C21B | C23B | 109.83(18) |
| C15A | N8A  | C21A | 115.36(19) | N8B  | C21B | C24B | 110.65(18) |
| C21A | N8A  | Na1A | 96.5(2)    | C22B | C21B | C23B | 107.64(19) |
| C21A | N8A  | P2A  | 127.72(18) | C22B | C21B | C24B | 108.9(2)   |
| C16A | N9A  | P2A  | 112.00(17) | C24B | C21B | C23B | 108.05(19) |
| C16A | N9A  | C17A | 118.4(2)   | N9B  | C17B | C18B | 109.15(19) |
| C17A | N9A  | P2A  | 124.64(17) | N9B  | C17B | C19B | 110.93(19) |
| C27A | N10A | P2A  | 120.1(2)   | N9B  | C17B | C20B | 110.33(19) |
| C27A | N10A | C25A | 116.0(2)   | C19B | C17B | C18B | 107.99(17) |
| C25A | N10A | P2A  | 122.4(2)   | C20B | C17B | C18B | 108.54(17) |
| N8A  | C15A | C16A | 105.1(2)   | C20B | C17B | C19B | 109.84(17) |

|      |      |      |            |      |      |      |            |
|------|------|------|------------|------|------|------|------------|
| N9A  | C16A | C15A | 105.3(2)   | N10B | C27B | C28B | 114.3(2)   |
| N8A  | C21A | C22A | 111.6(2)   | N10B | C25B | C26B | 116.2(2)   |
| N8A  | C21A | C23A | 109.6(2)   | N4B  | P4B  | N15B | 116.99(13) |
| N8A  | C21A | C24A | 111.3(2)   | N4B  | P4B  | N14B | 119.24(14) |
| C22A | C21A | C23A | 108.0(2)   | N4B  | P4B  | N16B | 113.43(13) |
| C22A | C21A | C24A | 108.7(2)   | N14B | P4B  | N15B | 91.89(9)   |
| C24A | C21A | C23A | 107.6(2)   | N16B | P4B  | N15B | 106.81(13) |
| N9A  | C17A | C18A | 109.1(2)   | N16B | P4B  | N14B | 105.93(13) |
| N9A  | C17A | C19A | 111.7(2)   | P4B  | N4B  | Ce1  | 169.90(14) |
| N9A  | C17A | C20A | 110.0(2)   | C44B | N15B | P4B  | 111.00(14) |
| C19A | C17A | C18A | 107.2(2)   | C44B | N15B | C45B | 117.24(18) |
| C20A | C17A | C18A | 108.8(2)   | C45B | N15B | P4B  | 123.44(16) |
| C20A | C17A | C19A | 109.9(2)   | C43B | N14B | P4B  | 113.15(14) |
| N10A | C27A | C28A | 115.2(3)   | C43B | N14B | C49B | 119.97(17) |
| N10A | C25A | C26A | 115.7(3)   | C49B | N14B | P4B  | 124.34(16) |
| N4A  | P4A  | N15A | 118.58(16) | C55B | N16B | P4B  | 121.14(17) |
| N4A  | P4A  | N14A | 120.03(17) | C55B | N16B | C53B | 116.43(19) |
| N4A  | P4A  | N16A | 111.92(15) | C53B | N16B | P4B  | 121.57(18) |
| N14A | P4A  | N15A | 91.72(11)  | N15B | C44B | C43B | 105.76(18) |
| N16A | P4A  | N15A | 106.10(15) | N14B | C43B | C44B | 106.50(18) |
| N16A | P4A  | N14A | 106.05(15) | N15B | C45B | C46B | 110.71(19) |
| P4A  | N4A  | Ce1  | 173.05(16) | N15B | C45B | C47B | 109.74(17) |
| C44A | N15A | P4A  | 111.54(16) | N15B | C45B | C48B | 110.83(18) |
| C44A | N15A | C45A | 117.4(2)   | C46B | C45B | C47B | 107.68(19) |
| C45A | N15A | P4A  | 122.77(18) | C46B | C45B | C48B | 108.99(19) |
| C43A | N14A | P4A  | 113.19(16) | C48B | C45B | C47B | 108.81(19) |
| C43A | N14A | C49A | 119.40(19) | N14B | C49B | C52B | 109.51(19) |
| C49A | N14A | P4A  | 125.37(18) | N14B | C49B | C50B | 110.89(19) |
| C55A | N16A | P4A  | 120.5(2)   | N14B | C49B | C51B | 111.04(19) |
| C55A | N16A | C53A | 116.3(2)   | C50B | C49B | C52B | 107.51(16) |
| C53A | N16A | P4A  | 122.0(2)   | C51B | C49B | C52B | 108.27(16) |
| N15A | C44A | C43A | 105.8(2)   | C51B | C49B | C50B | 109.52(17) |
| N14A | C43A | C44A | 106.5(2)   | N16B | C55B | C56B | 113.8(2)   |
| N15A | C45A | C46A | 110.1(2)   | N16B | C53B | C54B | 116.3(2)   |
| N15A | C45A | C47A | 109.9(2)   | N3B  | P3B  | N12B | 117.68(13) |
| N15A | C45A | C48A | 110.9(2)   | N3B  | P3B  | N11B | 119.36(14) |
| C46A | C45A | C47A | 108.1(2)   | N3B  | P3B  | N13B | 112.81(13) |
| C46A | C45A | C48A | 109.1(2)   | N11B | P3B  | N12B | 91.95(9)   |
| C48A | C45A | C47A | 108.7(2)   | N13B | P3B  | N12B | 107.15(13) |
| N14A | C49A | C52A | 109.2(2)   | N13B | P3B  | N11B | 105.42(13) |
| N14A | C49A | C50A | 111.1(2)   | P3B  | N3B  | Ce1  | 176.45(14) |
| N14A | C49A | C51A | 110.6(2)   | C30B | N12B | P3B  | 111.50(14) |
| C50A | C49A | C52A | 107.2(2)   | C30B | N12B | C31B | 117.69(18) |
| C51A | C49A | C52A | 108.4(2)   | C31B | N12B | P3B  | 124.54(15) |
| C51A | C49A | C50A | 110.3(2)   | C29B | N11B | P3B  | 113.04(14) |
| N16A | C55A | C56A | 113.7(3)   | C29B | N11B | C35B | 120.12(17) |
| N16A | C53A | C54A | 115.7(3)   | C35B | N11B | P3B  | 124.51(15) |
| N3A  | P3A  | N12A | 116.95(15) | C41B | N13B | P3B  | 120.33(17) |
| N3A  | P3A  | N11A | 120.58(16) | C41B | N13B | C39B | 116.17(19) |
| N3A  | P3A  | N13A | 112.29(14) | C39B | N13B | P3B  | 121.24(19) |
| N11A | P3A  | N12A | 91.64(11)  | N12B | C30B | C29B | 105.87(18) |
| N13A | P3A  | N12A | 107.27(15) | N11B | C29B | C30B | 106.48(18) |
| N13A | P3A  | N11A | 105.73(15) | N12B | C31B | C32B | 110.79(19) |
| P3A  | N3A  | Ce1  | 172.84(15) | N12B | C31B | C33B | 109.97(18) |
| C30A | N12A | P3A  | 110.25(16) | N12B | C31B | C34B | 110.85(19) |
| C30A | N12A | C31A | 117.1(2)   | C32B | C31B | C33B | 107.64(19) |
| C31A | N12A | P3A  | 123.25(17) | C32B | C31B | C34B | 108.77(19) |
| C29A | N11A | P3A  | 113.77(15) | C34B | C31B | C33B | 108.7(2)   |

|      |      |      |            |       |       |       |            |
|------|------|------|------------|-------|-------|-------|------------|
| C29A | N11A | C35A | 120.55(18) | N11B  | C35B  | C36B  | 109.62(19) |
| C35A | N11A | P3A  | 125.67(17) | N11B  | C35B  | C37B  | 110.93(19) |
| C41A | N13A | P3A  | 120.57(19) | N11B  | C35B  | C38B  | 111.08(19) |
| C41A | N13A | C39A | 116.2(2)   | C37B  | C35B  | C36B  | 107.47(16) |
| C39A | N13A | P3A  | 122.4(2)   | C38B  | C35B  | C36B  | 108.30(16) |
| N12A | C30A | C29A | 105.9(2)   | C38B  | C35B  | C37B  | 109.34(17) |
| N11A | C29A | C30A | 107.64(19) | N13B  | C41B  | C42B  | 113.7(2)   |
| N12A | C31A | C32A | 110.2(2)   | N13B  | C39B  | C40B  | 116.1(2)   |
| N12A | C31A | C33A | 110.0(2)   | N1B   | Na1B  | N2B   | 89.4(2)    |
| N12A | C31A | C34A | 111.3(2)   | N1B   | Na1B  | N8B   | 154.7(3)   |
| C32A | C31A | C33A | 107.8(2)   | N2B   | Na1B  | N8B   | 65.38(13)  |
| C32A | C31A | C34A | 108.8(2)   | C2S_1 | O1S_1 | C3S_1 | 113.5(3)   |
| C34A | C31A | C33A | 108.7(2)   | O1S_1 | C2S_1 | C1S_1 | 108.7(2)   |
| N11A | C35A | C38A | 109.5(2)   | O1S_1 | C3S_1 | C4S_1 | 108.7(3)   |
| N11A | C35A | C36A | 111.9(2)   |       |       |       |            |

**Table S19.** Bond lengths for **2-Ce<sup>K18c6</sup>**.

| Atom | Atom  | Length/Å  | Atom  | Atom  | Length/Å   |
|------|-------|-----------|-------|-------|------------|
| Ce1  | N1_4  | 2.326(7)  | P1_5  | N1_5  | 1.547(7)   |
| Ce1  | N1_5  | 2.319(7)  | P1_5  | N6_5  | 1.694(9)   |
| Ce1  | N3_7  | 2.334(8)  | P1_5  | N5_5  | 1.711(9)   |
| Ce1  | N2_8  | 2.376(7)  | P1_5  | N7_5  | 1.684(11)  |
| Ce1  | N1_9  | 2.376(7)  | N6_5  | C2_5  | 1.413(14)  |
| Ce1  | N4_10 | 2.326(7)  | N6_5  | C3_5  | 1.463(9)   |
| K1A  | O1S   | 2.728(12) | N5_5  | C1_5  | 1.409(14)  |
| K1A  | O2    | 2.708(15) | N5_5  | C7_5  | 1.463(9)   |
| K1A  | O1C_2 | 2.816(13) | N7_5  | C11_5 | 1.443(13)  |
| K1A  | O2C_2 | 2.908(12) | N7_5  | C13_5 | 1.440(14)  |
| K1A  | O5C_2 | 2.856(12) | C1_5  | C2_5  | 1.502(12)  |
| K1A  | O6C_2 | 2.862(13) | C7_5  | C10_5 | 1.525(16)  |
| K1B  | O1S   | 2.824(12) | C7_5  | C9_5  | 1.497(15)  |
| K1B  | O1C_3 | 2.876(12) | C7_5  | C8_5  | 1.535(14)  |
| K1B  | O2C_3 | 2.891(12) | C3_5  | C6_5  | 1.528(7)   |
| K1B  | O3C_3 | 2.863(11) | C3_5  | C5_5  | 1.529(7)   |
| K1B  | O4C_3 | 2.850(12) | C3_5  | C4_5  | 1.528(7)   |
| K1B  | O5C_3 | 2.826(12) | C11_5 | C12_5 | 1.5265(19) |
| K1B  | O6C_3 | 2.873(13) | C13_5 | C14_5 | 1.5262(18) |
| O2S  | C2S   | 1.424(4)  | P3_7  | N3_7  | 1.527(8)   |
| O2S  | C3S   | 1.425(4)  | P3_7  | N12_7 | 1.704(8)   |
| O1S  | C1S   | 1.424(4)  | P3_7  | N11_7 | 1.694(8)   |
| O1S  | C12S  | 1.424(4)  | P3_7  | N13_7 | 1.673(9)   |
| O2   | C11S  | 1.425(3)  | N12_7 | C30_7 | 1.458(12)  |
| O2   | C10S  | 1.424(3)  | N12_7 | C31_7 | 1.476(13)  |
| O3S  | C4S   | 1.423(4)  | N11_7 | C29_7 | 1.452(11)  |
| O3S  | C5S   | 1.426(4)  | N11_7 | C35_7 | 1.483(15)  |
| C6S  | O4S   | 1.419(4)  | N13_7 | C39_7 | 1.465(13)  |
| C6S  | C5S   | 1.5050(2) | N13_7 | C41_7 | 1.472(14)  |
| O4S  | C7S   | 1.427(4)  | C29_7 | C30_7 | 1.520(13)  |
| C1S  | C2S   | 1.5050(2) | C35_7 | C36_7 | 1.521(13)  |
| C12S | C11S  | 1.5050(2) | C35_7 | C38_7 | 1.534(14)  |
| C8S  | C7S   | 1.5050(2) | C35_7 | C37_7 | 1.545(12)  |
| C8S  | O5S   | 1.425(4)  | C31_7 | C34_7 | 1.543(13)  |
| C3S  | C4S   | 1.5050(2) | C31_7 | C33_7 | 1.537(13)  |
| C9S  | O5S   | 1.423(4)  | C31_7 | C32_7 | 1.533(12)  |
| C9S  | C10S  | 1.5050(2) | C39_7 | C40_7 | 1.524(14)  |
| O1T  | C1T   | 1.425(2)  | C41_7 | C42_7 | 1.531(15)  |
| O1T  | C3T   | 1.425(2)  | P2_8  | N2_8  | 1.438(12)  |

|        |        |            |        |        |            |
|--------|--------|------------|--------|--------|------------|
| C1T    | C2T    | 1.505(2)   | P2_8   | N9_8   | 1.76(2)    |
| C4T    | C3T    | 1.505(2)   | P2_8   | N8_8   | 1.72(2)    |
| O1C_2  | C1C_2  | 1.4248(15) | P2_8   | N10_8  | 1.70(2)    |
| O1C_2  | C12C_2 | 1.4250(16) | N9_8   | C16_8  | 1.47(3)    |
| O2C_2  | C2C_2  | 1.4250(15) | N9_8   | C17_8  | 1.47(3)    |
| O2C_2  | C3C_2  | 1.4246(15) | N8_8   | C15_8  | 1.47(3)    |
| O3C_2  | C4C_2  | 1.4246(15) | N8_8   | C21_8  | 1.53(3)    |
| O3C_2  | C5C_2  | 1.4248(16) | N10_8  | C25_8  | 1.51(3)    |
| O4C_2  | C6C_2  | 1.4242(15) | N10_8  | C27_8  | 1.45(3)    |
| O4C_2  | C7C_2  | 1.4246(15) | C15_8  | C16_8  | 1.57(3)    |
| O5C_2  | C8C_2  | 1.425(3)   | C21_8  | C24_8  | 1.55(4)    |
| O5C_2  | C9C_2  | 1.424(3)   | C21_8  | C23_8  | 1.47(3)    |
| O6C_2  | C10C_2 | 1.424(3)   | C21_8  | C22_8  | 1.56(3)    |
| O6C_2  | C11C_2 | 1.423(3)   | C17_8  | C20_8  | 1.528(6)   |
| C1C_2  | C2C_2  | 1.498(12)  | C17_8  | C19_8  | 1.528(6)   |
| C3C_2  | C4C_2  | 1.509(12)  | C17_8  | C18_8  | 1.528(6)   |
| C5C_2  | C6C_2  | 1.499(11)  | C25_8  | C26_8  | 1.48(3)    |
| C7C_2  | C8C_2  | 1.518(12)  | C27_8  | C28_8  | 1.525(2)   |
| C9C_2  | C10C_2 | 1.530(15)  | P1_9   | N1_9   | 1.552(7)   |
| C11C_2 | C12C_2 | 1.510(12)  | P1_9   | N5_9   | 1.695(9)   |
| O1C_3  | C1C_3  | 1.4251(15) | P1_9   | N6_9   | 1.706(9)   |
| O1C_3  | C12C_3 | 1.4252(16) | P1_9   | N7_9   | 1.687(11)  |
| O2C_3  | C2C_3  | 1.4248(15) | N5_9   | C2_9   | 1.420(14)  |
| O2C_3  | C3C_3  | 1.4252(15) | N5_9   | C7_9   | 1.466(10)  |
| O3C_3  | C4C_3  | 1.4247(15) | N6_9   | C1_9   | 1.402(14)  |
| O3C_3  | C5C_3  | 1.4248(16) | N6_9   | C3_9   | 1.456(10)  |
| O4C_3  | C6C_3  | 1.4248(15) | N7_9   | C11_9  | 1.446(14)  |
| O4C_3  | C7C_3  | 1.4246(15) | N7_9   | C13_9  | 1.443(14)  |
| O5C_3  | C8C_3  | 1.425(3)   | C1_9   | C2_9   | 1.504(13)  |
| O5C_3  | C9C_3  | 1.424(3)   | C3_9   | C4_9   | 1.526(16)  |
| O6C_3  | C10C_3 | 1.425(3)   | C3_9   | C5_9   | 1.498(16)  |
| O6C_3  | C11C_3 | 1.424(3)   | C3_9   | C6_9   | 1.536(14)  |
| C1C_3  | C2C_3  | 1.499(12)  | C7_9   | C8_9   | 1.528(6)   |
| C3C_3  | C4C_3  | 1.508(12)  | C7_9   | C9_9   | 1.528(6)   |
| C5C_3  | C6C_3  | 1.498(11)  | C7_9   | C10_9  | 1.528(6)   |
| C7C_3  | C8C_3  | 1.519(12)  | C11_9  | C12_9  | 1.525(4)   |
| C9C_3  | C10C_3 | 1.529(15)  | C13_9  | C14_9  | 1.5248(18) |
| C11C_3 | C12C_3 | 1.510(12)  | P4_10  | N4_10  | 1.504(18)  |
| P1_4   | N1_4   | 1.549(7)   | P4_10  | N14_10 | 1.69(2)    |
| P1_4   | N5_4   | 1.693(9)   | P4_10  | N15_10 | 1.79(2)    |
| P1_4   | N6_4   | 1.711(9)   | P4_10  | N16_10 | 1.68(2)    |
| P1_4   | N7_4   | 1.685(11)  | N14_10 | C43_10 | 1.44(3)    |
| N5_4   | C2_4   | 1.413(14)  | N14_10 | C49_10 | 1.49(3)    |
| N5_4   | C7_4   | 1.460(10)  | N15_10 | C44_10 | 1.52(3)    |
| N6_4   | C1_4   | 1.408(14)  | N15_10 | C45_10 | 1.46(3)    |
| N6_4   | C3_4   | 1.461(10)  | N16_10 | C53_10 | 1.46(3)    |
| N7_4   | C11_4  | 1.441(14)  | N16_10 | C55_10 | 1.48(3)    |
| N7_4   | C13_4  | 1.438(14)  | C44_10 | C43_10 | 1.506(12)  |
| C1_4   | C2_4   | 1.506(12)  | C45_10 | C46_10 | 1.50(4)    |
| C3_4   | C4_4   | 1.526(16)  | C45_10 | C48_10 | 1.60(3)    |
| C3_4   | C5_4   | 1.497(16)  | C45_10 | C47_10 | 1.57(3)    |
| C3_4   | C6_4   | 1.535(14)  | C49_10 | C52_10 | 1.51(3)    |
| C7_4   | C8_4   | 1.530(7)   | C49_10 | C51_10 | 1.57(3)    |
| C7_4   | C9_4   | 1.530(7)   | C49_10 | C50_10 | 1.51(3)    |
| C7_4   | C10_4  | 1.528(7)   | C53_10 | C54_10 | 1.525(2)   |
| C11_4  | C12_4  | 1.5250(19) | C55_10 | C56_10 | 1.524(2)   |
| C13_4  | C14_4  | 1.5236(18) |        |        |            |

**Table S20.** Bond angles for 2-Ce<sup>K18c6</sup>.

| Atom  | Atom | Atom  | Angle/°  | Atom  | Atom  | Atom  | Angle/°   |
|-------|------|-------|----------|-------|-------|-------|-----------|
| N1_4  | Ce1  | N3_7  | 110.2(3) | N5_4  | C7_4  | C8_4  | 111.1(9)  |
| N1_4  | Ce1  | N1_9  | 109.9(3) | N5_4  | C7_4  | C9_4  | 111.0(9)  |
| N1_5  | Ce1  | N1_4  | 105.5(3) | N5_4  | C7_4  | C10_4 | 110.5(9)  |
| N1_5  | Ce1  | N3_7  | 107.3(3) | C8_4  | C7_4  | C9_4  | 106.8(9)  |
| N1_5  | Ce1  | N2_8  | 116.0(3) | C10_4 | C7_4  | C8_4  | 107.3(9)  |
| N1_5  | Ce1  | N1_9  | 116.0(3) | C10_4 | C7_4  | C9_4  | 110.0(9)  |
| N1_5  | Ce1  | N4_10 | 105.5(3) | N7_4  | C11_4 | C12_4 | 116.2(10) |
| N3_7  | Ce1  | N2_8  | 107.8(3) | N7_4  | C13_4 | C14_4 | 124.2(10) |
| N3_7  | Ce1  | N1_9  | 107.8(3) | N1_5  | P1_5  | N6_5  | 120.7(5)  |
| N4_10 | Ce1  | N3_7  | 110.2(3) | N1_5  | P1_5  | N5_5  | 119.4(4)  |
| N4_10 | Ce1  | N2_8  | 109.9(3) | N1_5  | P1_5  | N7_5  | 113.3(5)  |
| O1S   | K1A  | O1C_2 | 101.6(4) | N6_5  | P1_5  | N5_5  | 91.2(4)   |
| O1S   | K1A  | O2C_2 | 79.5(4)  | N7_5  | P1_5  | N6_5  | 103.6(5)  |
| O1S   | K1A  | O5C_2 | 128.7(4) | N7_5  | P1_5  | N5_5  | 105.3(5)  |
| O1S   | K1A  | O6C_2 | 146.9(4) | P1_5  | N1_5  | Ce1   | 157.3(5)  |
| O2    | K1A  | O1S   | 61.7(3)  | C2_5  | N6_5  | P1_5  | 113.8(7)  |
| O2    | K1A  | O1C_2 | 77.7(4)  | C2_5  | N6_5  | C3_5  | 119.0(8)  |
| O2    | K1A  | O2C_2 | 113.2(4) | C3_5  | N6_5  | P1_5  | 125.2(7)  |
| O2    | K1A  | O5C_2 | 95.1(4)  | C1_5  | N5_5  | P1_5  | 112.3(7)  |
| O2    | K1A  | O6C_2 | 86.6(4)  | C1_5  | N5_5  | C7_5  | 119.0(9)  |
| O1C_2 | K1A  | O2C_2 | 58.7(3)  | C7_5  | N5_5  | P1_5  | 121.9(7)  |
| O1C_2 | K1A  | O5C_2 | 118.2(4) | C11_5 | N7_5  | P1_5  | 121.5(7)  |
| O1C_2 | K1A  | O6C_2 | 59.4(3)  | C13_5 | N7_5  | P1_5  | 119.5(8)  |
| O5C_2 | K1A  | O2C_2 | 148.3(4) | C13_5 | N7_5  | C11_5 | 117.8(9)  |
| O5C_2 | K1A  | O6C_2 | 58.9(3)  | N5_5  | C1_5  | C2_5  | 107.4(9)  |
| O6C_2 | K1A  | O2C_2 | 107.0(4) | N6_5  | C2_5  | C1_5  | 109.1(9)  |
| O1S   | K1B  | O1C_3 | 90.4(4)  | N5_5  | C7_5  | C10_5 | 112.0(9)  |
| O1S   | K1B  | O2C_3 | 80.8(4)  | N5_5  | C7_5  | C9_5  | 110.2(9)  |
| O1S   | K1B  | O3C_3 | 76.9(4)  | N5_5  | C7_5  | C8_5  | 110.4(8)  |
| O1S   | K1B  | O4C_3 | 106.1(4) | C10_5 | C7_5  | C8_5  | 106.7(9)  |
| O1S   | K1B  | O5C_3 | 127.2(4) | C9_5  | C7_5  | C10_5 | 106.6(9)  |
| O1S   | K1B  | O6C_3 | 130.1(4) | C9_5  | C7_5  | C8_5  | 110.9(10) |
| O1C_3 | K1B  | O2C_3 | 58.3(3)  | N6_5  | C3_5  | C6_5  | 111.0(8)  |
| O3C_3 | K1B  | O1C_3 | 116.7(3) | N6_5  | C3_5  | C5_5  | 110.8(8)  |
| O3C_3 | K1B  | O2C_3 | 58.5(3)  | N6_5  | C3_5  | C4_5  | 110.3(8)  |
| O3C_3 | K1B  | O6C_3 | 149.8(4) | C6_5  | C3_5  | C5_5  | 107.1(8)  |
| O4C_3 | K1B  | O1C_3 | 160.1(4) | C4_5  | C3_5  | C6_5  | 107.5(8)  |
| O4C_3 | K1B  | O2C_3 | 112.6(3) | C4_5  | C3_5  | C5_5  | 110.0(8)  |
| O4C_3 | K1B  | O3C_3 | 58.6(3)  | N7_5  | C11_5 | C12_5 | 115.5(9)  |
| O4C_3 | K1B  | O6C_3 | 114.5(4) | N7_5  | C13_5 | C14_5 | 122.7(10) |
| O5C_3 | K1B  | O1C_3 | 117.3(4) | N3_7  | P3_7  | N12_7 | 121.7(4)  |
| O5C_3 | K1B  | O2C_3 | 151.8(4) | N3_7  | P3_7  | N11_7 | 121.8(5)  |
| O5C_3 | K1B  | O3C_3 | 119.4(4) | N3_7  | P3_7  | N13_7 | 112.7(4)  |
| O5C_3 | K1B  | O4C_3 | 61.2(2)  | N11_7 | P3_7  | N12_7 | 90.7(4)   |
| O5C_3 | K1B  | O6C_3 | 59.0(3)  | N13_7 | P3_7  | N12_7 | 103.6(4)  |
| O6C_3 | K1B  | O1C_3 | 58.5(3)  | N13_7 | P3_7  | N11_7 | 102.6(5)  |
| O6C_3 | K1B  | O2C_3 | 107.4(4) | P3_7  | N3_7  | Ce1   | 167.1(5)  |
| C2S   | O2S  | C3S   | 110.0(7) | C30_7 | N12_7 | P3_7  | 109.1(7)  |
| C1S   | O1S  | K1A   | 130.8(6) | C30_7 | N12_7 | C31_7 | 113.2(8)  |
| C1S   | O1S  | K1B   | 127.5(6) | C31_7 | N12_7 | P3_7  | 122.5(6)  |
| C12S  | O1S  | K1A   | 120.3(6) | C29_7 | N11_7 | P3_7  | 113.1(7)  |
| C12S  | O1S  | K1B   | 124.0(6) | C29_7 | N11_7 | C35_7 | 118.7(9)  |
| C12S  | O1S  | C1S   | 108.6(7) | C35_7 | N11_7 | P3_7  | 123.5(7)  |
| C11S  | O2   | K1A   | 97.6(8)  | C39_7 | N13_7 | P3_7  | 121.0(7)  |
| C11S  | O2   | K1B   | 94.6(8)  | C39_7 | N13_7 | C41_7 | 115.8(9)  |
| C10S  | O2   | K1A   | 130.3(9) | C41_7 | N13_7 | P3_7  | 123.1(7)  |

|        |        |        |           |       |       |       |           |
|--------|--------|--------|-----------|-------|-------|-------|-----------|
| C10S   | O2     | K1B    | 132.7(9)  | N11_7 | C29_7 | C30_7 | 107.3(8)  |
| C10S   | O2     | C11S   | 101.3(9)  | N12_7 | C30_7 | C29_7 | 103.9(9)  |
| C4S    | O3S    | C5S    | 120.3(8)  | N11_7 | C35_7 | C36_7 | 109.0(9)  |
| O4S    | C6S    | C5S    | 121.3(12) | N11_7 | C35_7 | C38_7 | 112.0(10) |
| C6S    | O4S    | C7S    | 111.4(12) | N11_7 | C35_7 | C37_7 | 107.6(10) |
| O1S    | C1S    | C2S    | 115.2(9)  | C36_7 | C35_7 | C38_7 | 109.6(12) |
| O1S    | C12S   | C11S   | 101.1(8)  | C36_7 | C35_7 | C37_7 | 107.2(10) |
| O5S    | C8S    | C7S    | 139.6(15) | C38_7 | C35_7 | C37_7 | 111.3(11) |
| O2S    | C2S    | C1S    | 107.3(8)  | N12_7 | C31_7 | C34_7 | 108.6(8)  |
| O4S    | C7S    | C8S    | 105.4(9)  | N12_7 | C31_7 | C33_7 | 108.6(9)  |
| O2S    | C3S    | C4S    | 113.5(10) | N12_7 | C31_7 | C32_7 | 113.9(9)  |
| O3S    | C4S    | C3S    | 117.4(8)  | C33_7 | C31_7 | C34_7 | 107.9(10) |
| O3S    | C5S    | C6S    | 108.4(7)  | C32_7 | C31_7 | C34_7 | 108.2(10) |
| O2     | C11S   | K1A    | 56.4(7)   | C32_7 | C31_7 | C33_7 | 109.4(9)  |
| O2     | C11S   | K1B    | 61.0(7)   | N13_7 | C39_7 | C40_7 | 113.4(10) |
| O2     | C11S   | C12S   | 124.7(9)  | N13_7 | C41_7 | C42_7 | 114.1(10) |
| C12S   | C11S   | K1A    | 94.4(6)   | N2_8  | P2_8  | N9_8  | 117.6(9)  |
| C12S   | C11S   | K1B    | 92.5(6)   | N2_8  | P2_8  | N8_8  | 122.6(10) |
| O5S    | C9S    | C10S   | 104.7(10) | N2_8  | P2_8  | N10_8 | 117.0(9)  |
| C9S    | O5S    | C8S    | 107.0(8)  | N8_8  | P2_8  | N9_8  | 90.8(10)  |
| O2     | C10S   | C9S    | 97.5(10)  | N10_8 | P2_8  | N9_8  | 103.8(10) |
| C1T    | O1T    | C3T    | 109.7(13) | N10_8 | P2_8  | N8_8  | 100.4(10) |
| O1T    | C1T    | C2T    | 103.6(15) | P2_8  | N2_8  | Ce1   | 176.8(7)  |
| O1T    | C3T    | C4T    | 108.5(15) | C16_8 | N9_8  | P2_8  | 106.4(16) |
| C1C_2  | O1C_2  | K1A    | 119.9(8)  | C16_8 | N9_8  | C17_8 | 117.3(18) |
| C12C_2 | O1C_2  | K1A    | 118.3(8)  | C17_8 | N9_8  | P2_8  | 117.3(15) |
| C12C_2 | O1C_2  | C1C_2  | 110.7(5)  | C15_8 | N8_8  | P2_8  | 111.3(16) |
| C2C_2  | O2C_2  | K1A    | 105.7(9)  | C15_8 | N8_8  | C21_8 | 121.0(19) |
| C2C_2  | O2C_2  | C3C_2  | 110.9(5)  | C21_8 | N8_8  | P2_8  | 122.8(17) |
| C3C_2  | O2C_2  | K1A    | 112.7(8)  | C25_8 | N10_8 | P2_8  | 119.3(15) |
| C4C_2  | O3C_2  | K1A    | 118.5(8)  | C27_8 | N10_8 | P2_8  | 122.2(17) |
| C4C_2  | O3C_2  | C5C_2  | 111.1(5)  | C27_8 | N10_8 | C25_8 | 114.2(19) |
| C5C_2  | O3C_2  | K1A    | 117.2(7)  | N8_8  | C15_8 | C16_8 | 107(2)    |
| C6C_2  | O4C_2  | K1A    | 111.8(9)  | N9_8  | C16_8 | C15_8 | 100(2)    |
| C6C_2  | O4C_2  | C7C_2  | 111.6(5)  | N8_8  | C21_8 | C24_8 | 109(2)    |
| C7C_2  | O4C_2  | K1A    | 100.1(7)  | N8_8  | C21_8 | C22_8 | 107(2)    |
| C8C_2  | O5C_2  | K1A    | 115.6(8)  | C24_8 | C21_8 | C22_8 | 108(2)    |
| C9C_2  | O5C_2  | K1A    | 117.5(9)  | C23_8 | C21_8 | N8_8  | 110(2)    |
| C9C_2  | O5C_2  | C8C_2  | 112.0(8)  | C23_8 | C21_8 | C24_8 | 113(2)    |
| C10C_2 | O6C_2  | K1A    | 115.0(10) | C23_8 | C21_8 | C22_8 | 109(2)    |
| C11C_2 | O6C_2  | K1A    | 109.4(10) | N9_8  | C17_8 | C20_8 | 109.1(17) |
| C11C_2 | O6C_2  | C10C_2 | 111.2(5)  | N9_8  | C17_8 | C19_8 | 105.6(17) |
| O1C_2  | C1C_2  | C2C_2  | 107.4(11) | N9_8  | C17_8 | C18_8 | 112.6(17) |
| O2C_2  | C2C_2  | K1A    | 51.7(7)   | C19_8 | C17_8 | C20_8 | 107.9(18) |
| O2C_2  | C2C_2  | C1C_2  | 108.4(11) | C18_8 | C17_8 | C20_8 | 111.8(18) |
| C1C_2  | C2C_2  | K1A    | 84.6(8)   | C18_8 | C17_8 | C19_8 | 109.4(19) |
| O2C_2  | C3C_2  | C4C_2  | 110.3(11) | C26_8 | C25_8 | N10_8 | 113.2(19) |
| O3C_2  | C4C_2  | C3C_2  | 105.1(10) | N10_8 | C27_8 | C28_8 | 112(2)    |
| O3C_2  | C5C_2  | C6C_2  | 109.8(10) | N1_9  | P1_9  | N5_9  | 121.6(5)  |
| O4C_2  | C6C_2  | C5C_2  | 104.9(10) | N1_9  | P1_9  | N6_9  | 118.6(5)  |
| O4C_2  | C7C_2  | K1A    | 56.2(6)   | N1_9  | P1_9  | N7_9  | 112.8(5)  |
| O4C_2  | C7C_2  | C8C_2  | 105.9(11) | N5_9  | P1_9  | N6_9  | 91.4(5)   |
| C8C_2  | C7C_2  | K1A    | 85.8(8)   | N7_9  | P1_9  | N5_9  | 103.6(6)  |
| O5C_2  | C8C_2  | C7C_2  | 109.3(10) | N7_9  | P1_9  | N6_9  | 105.8(5)  |
| O5C_2  | C9C_2  | C10C_2 | 106.1(13) | P1_9  | N1_9  | Ce1   | 163.1(5)  |
| O6C_2  | C10C_2 | C9C_2  | 110.2(12) | C2_9  | N5_9  | P1_9  | 112.6(8)  |
| O6C_2  | C11C_2 | C12C_2 | 107.5(12) | C2_9  | N5_9  | C7_9  | 117.2(9)  |
| O1C_2  | C12C_2 | C11C_2 | 110.5(12) | C7_9  | N5_9  | P1_9  | 124.8(8)  |

|        |        |        |           |        |        |        |           |
|--------|--------|--------|-----------|--------|--------|--------|-----------|
| C1C_3  | O1C_3  | K1B    | 118.4(8)  | C1_9   | N6_9   | P1_9   | 114.7(7)  |
| C12C_3 | O1C_3  | K1B    | 118.0(8)  | C1_9   | N6_9   | C3_9   | 121.0(9)  |
| C12C_3 | O1C_3  | C1C_3  | 110.6(5)  | C3_9   | N6_9   | P1_9   | 124.0(8)  |
| C2C_3  | O2C_3  | K1B    | 108.3(9)  | C11_9  | N7_9   | P1_9   | 120.2(8)  |
| C2C_3  | O2C_3  | C3C_3  | 110.4(5)  | C13_9  | N7_9   | P1_9   | 118.4(8)  |
| C3C_3  | O2C_3  | K1B    | 111.4(8)  | C13_9  | N7_9   | C11_9  | 116.9(10) |
| C4C_3  | O3C_3  | K1B    | 119.0(8)  | N6_9   | C1_9   | C2_9   | 107.5(10) |
| C4C_3  | O3C_3  | C5C_3  | 111.0(5)  | N5_9   | C2_9   | C1_9   | 108.2(10) |
| C5C_3  | O3C_3  | K1B    | 116.2(7)  | N6_9   | C3_9   | C4_9   | 112.7(10) |
| C6C_3  | O4C_3  | K1B    | 111.6(9)  | N6_9   | C3_9   | C5_9   | 110.4(9)  |
| C7C_3  | O4C_3  | K1B    | 101.5(7)  | N6_9   | C3_9   | C6_9   | 110.4(9)  |
| C7C_3  | O4C_3  | C6C_3  | 111.2(5)  | C4_9   | C3_9   | C6_9   | 106.4(10) |
| C8C_3  | O5C_3  | K1B    | 113.6(8)  | C5_9   | C3_9   | C4_9   | 106.1(10) |
| C9C_3  | O5C_3  | K1B    | 118.0(9)  | C5_9   | C3_9   | C6_9   | 110.7(10) |
| C9C_3  | O5C_3  | C8C_3  | 112.1(8)  | N5_9   | C7_9   | C8_9   | 111.2(8)  |
| C10C_3 | O6C_3  | K1B    | 114.8(10) | N5_9   | C7_9   | C9_9   | 111.0(8)  |
| C11C_3 | O6C_3  | K1B    | 111.3(10) | N5_9   | C7_9   | C10_9  | 109.9(8)  |
| C11C_3 | O6C_3  | C10C_3 | 110.8(5)  | C8_9   | C7_9   | C9_9   | 107.2(9)  |
| O1C_3  | C1C_3  | C2C_3  | 106.9(11) | C8_9   | C7_9   | C10_9  | 107.5(9)  |
| O2C_3  | C2C_3  | C1C_3  | 108.1(11) | C10_9  | C7_9   | C9_9   | 109.9(9)  |
| O2C_3  | C3C_3  | C4C_3  | 110.5(11) | N7_9   | C11_9  | C12_9  | 115.8(10) |
| O3C_3  | C4C_3  | C3C_3  | 105.1(10) | N7_9   | C13_9  | C14_9  | 122.9(11) |
| O3C_3  | C5C_3  | C6C_3  | 109.9(10) | N4_10  | P4_10  | N14_10 | 122.8(12) |
| O4C_3  | C6C_3  | C5C_3  | 105.1(10) | N4_10  | P4_10  | N15_10 | 120.7(11) |
| O4C_3  | C7C_3  | K1B    | 54.5(6)   | N4_10  | P4_10  | N16_10 | 112.2(11) |
| O4C_3  | C7C_3  | C8C_3  | 105.7(11) | N14_10 | P4_10  | N15_10 | 90.4(11)  |
| C8C_3  | C7C_3  | K1B    | 85.4(8)   | N16_10 | P4_10  | N14_10 | 105.3(12) |
| O5C_3  | C8C_3  | C7C_3  | 108.9(10) | N16_10 | P4_10  | N15_10 | 101.7(12) |
| O5C_3  | C9C_3  | C10C_3 | 106.2(13) | P4_10  | N4_10  | Ce1    | 174.7(8)  |
| O6C_3  | C10C_3 | C9C_3  | 110.4(12) | C43_10 | N14_10 | P4_10  | 114.5(16) |
| O6C_3  | C11C_3 | C12C_3 | 107.5(11) | C43_10 | N14_10 | C49_10 | 118.2(19) |
| O1C_3  | C12C_3 | C11C_3 | 110.3(12) | C49_10 | N14_10 | P4_10  | 127.3(17) |
| N1_4   | P1_4   | N5_4   | 121.0(6)  | C44_10 | N15_10 | P4_10  | 104.6(15) |
| N1_4   | P1_4   | N6_4   | 119.3(6)  | C45_10 | N15_10 | P4_10  | 121.7(16) |
| N1_4   | P1_4   | N7_4   | 113.2(5)  | C45_10 | N15_10 | C44_10 | 114.2(19) |
| N5_4   | P1_4   | N6_4   | 91.0(5)   | C53_10 | N16_10 | P4_10  | 118.7(17) |
| N7_4   | P1_4   | N5_4   | 103.7(6)  | C53_10 | N16_10 | C55_10 | 118(2)    |
| N7_4   | P1_4   | N6_4   | 105.5(6)  | C55_10 | N16_10 | P4_10  | 114.2(16) |
| P1_4   | N1_4   | Ce1    | 178.5(5)  | C43_10 | C44_10 | N15_10 | 102.0(19) |
| C2_4   | N5_4   | P1_4   | 114.0(7)  | N14_10 | C43_10 | C44_10 | 105.6(19) |
| C2_4   | N5_4   | C7_4   | 119.8(9)  | N15_10 | C45_10 | C46_10 | 109(2)    |
| C7_4   | N5_4   | P1_4   | 126.2(8)  | N15_10 | C45_10 | C48_10 | 113(2)    |
| C1_4   | N6_4   | P1_4   | 112.4(8)  | N15_10 | C45_10 | C47_10 | 109(2)    |
| C1_4   | N6_4   | C3_4   | 119.7(10) | C46_10 | C45_10 | C48_10 | 110(2)    |
| C3_4   | N6_4   | P1_4   | 122.2(8)  | C46_10 | C45_10 | C47_10 | 109(2)    |
| C11_4  | N7_4   | P1_4   | 121.6(9)  | C47_10 | C45_10 | C48_10 | 107(2)    |
| C13_4  | N7_4   | P1_4   | 119.2(8)  | N14_10 | C49_10 | C52_10 | 111(2)    |
| C13_4  | N7_4   | C11_4  | 118.7(10) | N14_10 | C49_10 | C51_10 | 105(2)    |
| N6_4   | C1_4   | C2_4   | 106.9(10) | N14_10 | C49_10 | C50_10 | 105(2)    |
| N5_4   | C2_4   | C1_4   | 108.7(10) | C52_10 | C49_10 | C51_10 | 110(2)    |
| N6_4   | C3_4   | C4_4   | 112.2(10) | C50_10 | C49_10 | C52_10 | 113(2)    |
| N6_4   | C3_4   | C5_4   | 110.1(9)  | C50_10 | C49_10 | C51_10 | 113(2)    |
| N6_4   | C3_4   | C6_4   | 110.5(9)  | N16_10 | C53_10 | C54_10 | 109.2(19) |
| C4_4   | C3_4   | C6_4   | 106.6(10) | N16_10 | C55_10 | C56_10 | 124.0(19) |
| C5_4   | C3_4   | C4_4   | 106.5(10) | C55_10 | C56_10 | K1A    | 163.8(16) |
| C5_4   | C3_4   | C6_4   | 110.9(10) |        |        |        |           |

**Table S21.** Bond lengths for 2-Ce<sup>Rb</sup>.

| Atom | Atom | Length/Å  | Atom | Atom | Length/Å   |
|------|------|-----------|------|------|------------|
| Ce1  | N1   | 2.380(7)  | C6   | Rb1  | 3.564(14)  |
| Ce1  | N2   | 2.381(7)  | C7   | C8   | 1.519(14)  |
| Ce1  | N3   | 2.335(7)  | C7   | C9   | 1.549(13)  |
| Ce1  | N4   | 2.322(7)  | C7   | C10  | 1.535(14)  |
| Ce1  | Rb1  | 3.9474(9) | C8   | Rb1  | 3.571(10)  |
| P1   | N1   | 1.535(7)  | C11  | C12  | 1.520(15)  |
| P1   | N5   | 1.697(8)  | C13  | C14  | 1.531(12)  |
| P1   | N6   | 1.730(8)  | C15  | C16  | 1.508(13)  |
| P1   | N7   | 1.660(8)  | C17  | C18  | 1.507(13)  |
| P1   | Rb1  | 3.469(2)  | C17  | C19  | 1.543(14)  |
| P2   | N2   | 1.529(7)  | C17  | C20  | 1.523(15)  |
| P2   | N8   | 1.717(7)  | C21  | C22  | 1.510(14)  |
| P2   | N9   | 1.713(7)  | C21  | C23  | 1.535(15)  |
| P2   | N10  | 1.689(8)  | C21  | C24  | 1.557(12)  |
| P2   | Rb1  | 3.411(2)  | C27  | C28  | 1.514(13)  |
| P3   | N3   | 1.533(7)  | C25  | C26  | 1.522(13)  |
| P3   | N11  | 1.695(8)  | C29  | C30  | 1.514(14)  |
| P3   | N12  | 1.724(8)  | C31  | C32  | 1.518(17)  |
| P3   | N13  | 1.685(8)  | C31  | C33  | 1.549(15)  |
| P4   | N4   | 1.538(7)  | C31  | C34  | 1.529(16)  |
| P4   | N14  | 1.718(8)  | C35  | C36  | 1.539(12)  |
| P4   | N15  | 1.704(8)  | C35  | C37  | 1.524(13)  |
| P4   | N16  | 1.675(8)  | C35  | C38  | 1.545(13)  |
| N1   | Rb1  | 2.939(7)  | C41  | C42  | 1.522(17)  |
| N2   | Rb1  | 2.896(7)  | C39  | C40  | 1.525(15)  |
| N5   | C1   | 1.461(12) | C43  | C44  | 1.514(16)  |
| N5   | C7   | 1.469(13) | C43  | C45  | 1.526(15)  |
| N5   | Rb1  | 3.545(9)  | C43  | C46  | 1.534(16)  |
| N6   | C2   | 1.424(13) | C47  | C48  | 1.431(11)  |
| N6   | C3   | 1.473(12) | C49  | C50  | 1.532(14)  |
| N7   | C11  | 1.439(12) | C49  | C51  | 1.522(14)  |
| N7   | C13  | 1.465(11) | C49  | C52  | 1.527(14)  |
| N8   | C15  | 1.447(11) | C53  | C54  | 1.534(17)  |
| N8   | C21  | 1.476(12) | C55  | C56  | 1.485(15)  |
| N9   | C16  | 1.477(11) | Rb1  | O1SB | 2.884(10)  |
| N9   | C17  | 1.490(11) | Rb1  | O1SC | 2.903(10)  |
| N9   | Rb1  | 3.219(8)  | O1S  | C1S  | 1.422(2)   |
| N10  | C27  | 1.471(11) | O1S  | C3S  | 1.422(2)   |
| N10  | C25  | 1.461(11) | C1S  | C2S  | 1.5202(15) |
| N11  | C29  | 1.461(11) | C3S  | C4S  | 1.5200(16) |
| N11  | C35  | 1.458(12) | O1   | C1A  | 1.4210(17) |
| N12  | C30  | 1.456(13) | O1   | C1C  | 1.4207(17) |
| N12  | C31  | 1.485(13) | C1A  | C1B  | 1.5203(15) |
| N13  | C41  | 1.461(12) | C1C  | C1D  | 1.5203(15) |
| N13  | C39  | 1.461(12) | O1SE | C1SE | 1.421(2)   |
| N14  | C48  | 1.434(12) | O1SE | C3SE | 1.421(2)   |
| N14  | C49  | 1.486(13) | C1SE | C2SE | 1.520(2)   |
| N15  | C43  | 1.482(13) | C3SE | C4SE | 1.520(2)   |
| N15  | C47  | 1.438(13) | O1SB | C1SB | 1.422(2)   |
| N16  | C54  | 1.463(12) | O1SB | C3SB | 1.422(2)   |
| N16  | C55  | 1.456(12) | C1SB | C2SB | 1.520(2)   |
| C1   | C2   | 1.490(15) | C3SB | C4SB | 1.520(2)   |
| C2   | Rb1  | 3.627(12) | O1SC | C1SC | 1.422(2)   |
| C3   | C4   | 1.561(17) | O1SC | C3SC | 1.422(2)   |
| C3   | C5   | 1.478(17) | C1SC | C2SC | 1.5202(16) |
| C3   | C6   | 1.518(15) | C3SC | C4SC | 1.5202(15) |



**Table S22.** Bond angles for 2-Ce<sup>Rb</sup>.

| Atom | Atom | Atom | Angle/°    | Atom | Atom | Atom | Angle/°   |
|------|------|------|------------|------|------|------|-----------|
| N1   | Ce1  | N2   | 94.6(2)    | N5   | C1   | C2   | 106.7(8)  |
| N1   | Ce1  | Rb1  | 47.86(18)  | N6   | C2   | C1   | 108.8(8)  |
| N2   | Ce1  | Rb1  | 46.80(18)  | N6   | C2   | Rb1  | 81.4(6)   |
| N3   | Ce1  | N1   | 112.8(3)   | C1   | C2   | Rb1  | 88.4(6)   |
| N3   | Ce1  | N2   | 113.7(3)   | N6   | C3   | C4   | 109.5(9)  |
| N3   | Ce1  | Rb1  | 123.45(19) | N6   | C3   | C5   | 112.2(10) |
| N4   | Ce1  | N1   | 112.9(3)   | N6   | C3   | C6   | 109.8(9)  |
| N4   | Ce1  | N2   | 113.0(3)   | C5   | C3   | C4   | 105.5(10) |
| N4   | Ce1  | N3   | 109.2(3)   | C5   | C3   | C6   | 112.6(11) |
| N4   | Ce1  | Rb1  | 127.31(19) | C6   | C3   | C4   | 107.0(10) |
| N1   | P1   | N5   | 118.0(4)   | C3   | C6   | Rb1  | 107.5(7)  |
| N1   | P1   | N6   | 120.7(4)   | N5   | C7   | C8   | 109.8(8)  |
| N1   | P1   | N7   | 113.9(4)   | N5   | C7   | C9   | 109.6(8)  |
| N1   | P1   | Rb1  | 57.3(3)    | N5   | C7   | C10  | 112.6(7)  |
| N5   | P1   | N6   | 91.0(4)    | C8   | C7   | C9   | 108.9(8)  |
| N5   | P1   | Rb1  | 78.5(3)    | C8   | C7   | C10  | 108.4(8)  |
| N6   | P1   | Rb1  | 83.3(3)    | C10  | C7   | C9   | 107.5(9)  |
| N7   | P1   | N5   | 107.0(4)   | C7   | C8   | Rb1  | 101.2(6)  |
| N7   | P1   | N6   | 103.1(4)   | N7   | C11  | C12  | 114.4(9)  |
| N7   | P1   | Rb1  | 171.2(3)   | N7   | C13  | C14  | 114.1(8)  |
| N2   | P2   | N8   | 120.6(4)   | N8   | C15  | C16  | 105.8(7)  |
| N2   | P2   | N9   | 116.3(4)   | N9   | C16  | C15  | 105.7(7)  |
| N2   | P2   | N10  | 114.3(4)   | N9   | C17  | C18  | 110.7(8)  |
| N2   | P2   | Rb1  | 57.6(3)    | N9   | C17  | C19  | 111.3(8)  |
| N8   | P2   | Rb1  | 92.0(3)    | N9   | C17  | C20  | 108.4(8)  |
| N9   | P2   | N8   | 91.3(4)    | C18  | C17  | C19  | 108.6(9)  |
| N9   | P2   | Rb1  | 68.9(3)    | C18  | C17  | C20  | 110.0(9)  |
| N10  | P2   | N8   | 103.9(4)   | C20  | C17  | C19  | 107.8(9)  |
| N10  | P2   | N9   | 107.4(4)   | N8   | C21  | C22  | 111.2(8)  |
| N10  | P2   | Rb1  | 163.8(3)   | N8   | C21  | C23  | 111.5(9)  |
| N3   | P3   | N11  | 121.1(4)   | N8   | C21  | C24  | 108.6(7)  |
| N3   | P3   | N12  | 121.2(4)   | C22  | C21  | C23  | 109.7(8)  |
| N3   | P3   | N13  | 113.1(4)   | C22  | C21  | C24  | 107.3(8)  |
| N11  | P3   | N12  | 90.4(4)    | C23  | C21  | C24  | 108.4(8)  |
| N13  | P3   | N11  | 103.9(4)   | N10  | C27  | C28  | 113.3(8)  |
| N13  | P3   | N12  | 103.6(4)   | N10  | C25  | C26  | 114.4(8)  |
| N4   | P4   | N14  | 121.3(4)   | N11  | C29  | C30  | 106.1(7)  |
| N4   | P4   | N15  | 120.8(4)   | N12  | C30  | C29  | 104.7(8)  |
| N4   | P4   | N16  | 112.4(4)   | N12  | C31  | C32  | 109.3(9)  |
| N15  | P4   | N14  | 91.0(4)    | N12  | C31  | C33  | 107.7(9)  |
| N16  | P4   | N14  | 103.5(4)   | N12  | C31  | C34  | 112.6(9)  |
| N16  | P4   | N15  | 104.5(4)   | C32  | C31  | C33  | 108.8(10) |
| Ce1  | N1   | Rb1  | 95.2(2)    | C32  | C31  | C34  | 108.8(9)  |
| P1   | N1   | Ce1  | 160.4(5)   | C34  | C31  | C33  | 109.6(11) |
| P1   | N1   | Rb1  | 96.6(3)    | N11  | C35  | C36  | 110.3(7)  |
| Ce1  | N2   | Rb1  | 96.4(2)    | N11  | C35  | C37  | 111.0(8)  |
| P2   | N2   | Ce1  | 163.4(5)   | N11  | C35  | C38  | 109.7(8)  |
| P2   | N2   | Rb1  | 95.9(3)    | C36  | C35  | C38  | 107.7(8)  |
| P3   | N3   | Ce1  | 174.0(5)   | C37  | C35  | C36  | 108.6(8)  |
| P4   | N4   | Ce1  | 175.5(5)   | C37  | C35  | C38  | 109.5(8)  |
| P1   | N5   | Rb1  | 73.5(3)    | N13  | C41  | C42  | 114.5(9)  |
| C1   | N5   | P1   | 114.6(6)   | N13  | C39  | C40  | 114.6(9)  |
| C1   | N5   | C7   | 118.7(7)   | N15  | C43  | C44  | 110.5(9)  |
| C1   | N5   | Rb1  | 92.0(5)    | N15  | C43  | C45  | 109.4(10) |
| C7   | N5   | P1   | 126.7(6)   | N15  | C43  | C46  | 110.6(8)  |
| C7   | N5   | Rb1  | 103.6(5)   | C44  | C43  | C45  | 107.3(10) |

|     |     |     |          |      |      |      |           |
|-----|-----|-----|----------|------|------|------|-----------|
| C2  | N6  | P1  | 112.7(7) | C44  | C43  | C46  | 110.0(10) |
| C2  | N6  | C3  | 118.6(8) | C45  | C43  | C46  | 109.1(11) |
| C3  | N6  | P1  | 124.3(7) | C48  | C47  | N15  | 110.6(9)  |
| C11 | N7  | P1  | 122.7(6) | C47  | C48  | N14  | 110.6(9)  |
| C11 | N7  | C13 | 115.7(7) | N14  | C49  | C50  | 110.6(8)  |
| C13 | N7  | P1  | 121.5(6) | N14  | C49  | C51  | 111.0(8)  |
| C15 | N8  | P2  | 113.5(6) | N14  | C49  | C52  | 108.9(8)  |
| C15 | N8  | C21 | 115.6(7) | C51  | C49  | C50  | 108.8(9)  |
| C21 | N8  | P2  | 122.5(6) | C51  | C49  | C52  | 108.0(9)  |
| P2  | N9  | Rb1 | 81.3(3)  | C52  | C49  | C50  | 109.5(9)  |
| C16 | N9  | P2  | 112.1(6) | N16  | C54  | C53  | 114.2(9)  |
| C16 | N9  | C17 | 116.2(7) | N16  | C55  | C56  | 114.6(9)  |
| C16 | N9  | Rb1 | 106.1(5) | N2   | Rb1  | N1   | 73.68(18) |
| C17 | N9  | P2  | 125.5(6) | N2   | Rb1  | O1SC | 148.6(3)  |
| C17 | N9  | Rb1 | 107.2(5) | O1SB | Rb1  | N1   | 142.8(4)  |
| C27 | N10 | P2  | 121.9(6) | O1SB | Rb1  | N2   | 143.0(3)  |
| C25 | N10 | P2  | 121.4(6) | O1SC | Rb1  | N1   | 136.9(3)  |
| C25 | N10 | C27 | 116.1(7) | C1S  | O1S  | C3S  | 114.7(7)  |
| C29 | N11 | P3  | 113.8(6) | O1S  | C1S  | C2S  | 112.6(9)  |
| C35 | N11 | P3  | 125.2(6) | O1S  | C3S  | C4S  | 114.3(9)  |
| C35 | N11 | C29 | 117.6(7) | C1C  | O1   | C1A  | 114.8(7)  |
| C30 | N12 | P3  | 108.3(6) | O1   | C1A  | C1B  | 112.6(9)  |
| C30 | N12 | C31 | 115.5(8) | O1   | C1C  | C1D  | 114.4(9)  |
| C31 | N12 | P3  | 121.3(7) | C3SE | O1SE | C1SE | 114.7(7)  |
| C41 | N13 | P3  | 121.2(6) | O1SE | C1SE | C2SE | 112.6(9)  |
| C41 | N13 | C39 | 116.6(8) | O1SE | C3SE | C4SE | 114.3(9)  |
| C39 | N13 | P3  | 122.2(7) | C1SB | O1SB | Rb1  | 119.3(9)  |
| C48 | N14 | P4  | 111.3(7) | C3SB | O1SB | Rb1  | 125.7(9)  |
| C48 | N14 | C49 | 118.4(8) | C3SB | O1SB | C1SB | 114.7(7)  |
| C49 | N14 | P4  | 123.6(6) | O1SB | C1SB | C2SB | 112.6(9)  |
| C43 | N15 | P4  | 123.7(6) | O1SB | C3SB | C4SB | 114.3(9)  |
| C47 | N15 | P4  | 111.5(7) | C1SC | O1SC | Rb1  | 117.0(9)  |
| C47 | N15 | C43 | 118.4(9) | C1SC | O1SC | C3SC | 114.7(7)  |
| C54 | N16 | P4  | 121.8(6) | C3SC | O1SC | Rb1  | 127.7(9)  |
| C55 | N16 | P4  | 121.1(6) | O1SC | C1SC | C2SC | 112.6(9)  |
| C55 | N16 | C54 | 117.1(8) | O1SC | C3SC | C4SC | 114.3(9)  |

**Table S23.** Bond lengths for 2-Ce<sup>Cs</sup>.

| Atom | Atom  | Length/Å | Atom | Atom  | Length/Å  |
|------|-------|----------|------|-------|-----------|
| Ce1  | N2    | 2.326(6) | N1_2 | C1_2  | 1.450(9)  |
| Ce1  | N3    | 2.388(5) | N1_2 | C3_2  | 1.481(9)  |
| Ce1  | N4    | 2.398(5) | N2_2 | C2_2  | 1.467(9)  |
| Ce1  | N9    | 2.295(6) | N2_2 | C7_2  | 1.477(9)  |
| Cs1  | N3    | 3.068(6) | C1_2 | C2_2  | 1.518(11) |
| Cs1  | N4    | 3.052(6) | C3_2 | C4_2  | 1.529(11) |
| Cs1  | O1_19 | 3.155(8) | C3_2 | C5_2  | 1.557(11) |
| Cs1  | N1_1  | 3.327(6) | C3_2 | C6_2  | 1.523(11) |
| P1   | N9    | 1.541(6) | C7_2 | C8_2  | 1.535(11) |
| P1   | N1_26 | 1.689(6) | C7_2 | C9_2  | 1.539(10) |
| P1   | N1_3  | 1.726(6) | C7_2 | C10_2 | 1.522(12) |
| P1   | N2_3  | 1.700(6) | N1_3 | C1_3  | 1.455(9)  |
| P2   | N2    | 1.544(6) | N1_3 | C3_3  | 1.474(9)  |
| P2   | N1_24 | 1.688(7) | N2_3 | C2_3  | 1.461(12) |
| P2   | N1_4  | 1.709(7) | N2_3 | C7_3  | 1.474(9)  |
| P2   | N2_4  | 1.717(6) | C1_3 | C2_3  | 1.523(12) |
| P3   | N3    | 1.534(6) | C3_3 | C4_3  | 1.525(10) |
| P3   | N1_23 | 1.685(6) | C3_3 | C5_3  | 1.548(11) |

|        |        |           |       |       |           |
|--------|--------|-----------|-------|-------|-----------|
| P3     | N1_1   | 1.731(6)  | C3_3  | C6_3  | 1.525(11) |
| P3     | N2_1   | 1.727(6)  | C7_3  | C8_3  | 1.540(11) |
| P4     | N4     | 1.532(6)  | C7_3  | C9_3  | 1.535(12) |
| P4     | N1_2   | 1.734(6)  | C7_3  | C10_3 | 1.530(15) |
| P4     | N2_2   | 1.701(5)  | N1_4  | C1_4  | 1.426(11) |
| P4     | N1_14  | 1.682(6)  | N1_4  | C3_4  | 1.473(10) |
| Ce2    | N5     | 2.315(6)  | N2_4  | C2_4  | 1.445(12) |
| Ce2    | N6     | 2.348(5)  | N2_4  | C7_4  | 1.465(9)  |
| Ce2    | N7     | 2.364(5)  | C1_4  | C2_4  | 1.448(13) |
| Ce2    | N8     | 2.358(5)  | C3_4  | C4_4  | 1.521(11) |
| Cs2    | N7     | 3.067(6)  | C3_4  | C5_4  | 1.552(11) |
| Cs2    | N8     | 3.080(7)  | C3_4  | C6_4  | 1.532(13) |
| Cs2    | O2     | 3.136(9)  | C7_4  | C8_4  | 1.530(11) |
| Cs2    | N2_5   | 3.323(6)  | C7_4  | C9_4  | 1.541(11) |
| P5     | N5     | 1.541(6)  | C7_4  | C10_4 | 1.532(12) |
| P5     | N1_20  | 1.689(5)  | N1_5  | C1_5  | 1.452(9)  |
| P5     | N1_6   | 1.720(5)  | N1_5  | C3_5  | 1.479(9)  |
| P5     | N2_6   | 1.698(6)  | N2_5  | C2_5  | 1.464(10) |
| P6     | N6     | 1.536(6)  | N2_5  | C7_5  | 1.490(9)  |
| P6     | N1_21  | 1.687(6)  | C1_5  | C2_5  | 1.524(11) |
| P6     | N1_15  | 1.709(6)  | C3_5  | C4_5  | 1.527(12) |
| P6     | N2_15  | 1.702(6)  | C3_5  | C5_5  | 1.520(14) |
| P7     | N7     | 1.538(5)  | C3_5  | C6_5  | 1.535(11) |
| P7     | N1_22  | 1.687(6)  | C7_5  | C8_5  | 1.547(11) |
| P7     | N1_7   | 1.695(5)  | C7_5  | C9_5  | 1.526(12) |
| P7     | N2_7   | 1.749(6)  | C7_5  | C10_5 | 1.533(12) |
| P8     | N8     | 1.530(6)  | N1_6  | C1_6  | 1.461(9)  |
| P8     | N1_25  | 1.699(6)  | N1_6  | C3_6  | 1.480(9)  |
| P8     | N1_5   | 1.719(6)  | N2_6  | C2_6  | 1.448(8)  |
| P8     | N2_5   | 1.733(6)  | N2_6  | C7_6  | 1.483(9)  |
| O2     | C5     | 1.422(3)  | C1_6  | C2_6  | 1.525(11) |
| O2     | C7     | 1.420(3)  | C3_6  | C4_6  | 1.545(10) |
| C5     | C6     | 1.520(3)  | C3_6  | C5_6  | 1.534(11) |
| C7     | C8     | 1.519(3)  | C3_6  | C6_6  | 1.533(10) |
| O1_18  | C2_18  | 1.395(13) | C7_6  | C8_6  | 1.528(11) |
| O1_18  | C3_18  | 1.457(14) | C7_6  | C9_6  | 1.531(9)  |
| C1_18  | C2_18  | 1.524(3)  | C7_6  | C10_6 | 1.542(9)  |
| C3_18  | C4_18  | 1.524(3)  | N1_7  | C1_7  | 1.464(9)  |
| O1_19  | C2_19  | 1.449(7)  | N1_7  | C3_7  | 1.492(9)  |
| O1_19  | C3_19  | 1.450(7)  | N2_7  | C2_7  | 1.456(8)  |
| C1_19  | C2_19  | 1.526(3)  | N2_7  | C7_7  | 1.487(9)  |
| C3_19  | C4_19  | 1.525(3)  | C1_7  | C2_7  | 1.515(10) |
| O1_27  | C2_27  | 1.401(17) | C3_7  | C4_7  | 1.550(13) |
| O1_27  | C3_27  | 1.434(15) | C3_7  | C5_7  | 1.530(11) |
| C1_27  | C2_27  | 1.525(17) | C3_7  | C6_7  | 1.540(11) |
| C3_27  | C4_27  | 1.534(18) | C7_7  | C8_7  | 1.531(10) |
| N1_20  | C11_20 | 1.450(8)  | C7_7  | C9_7  | 1.547(12) |
| N1_20  | C13_20 | 1.460(7)  | C7_7  | C10_7 | 1.520(10) |
| C11_20 | C12_20 | 1.524(9)  | N1_15 | C1_15 | 1.437(10) |
| C13_20 | C14_20 | 1.523(10) | N1_15 | C3_15 | 1.472(9)  |
| N1_21  | C11_21 | 1.443(7)  | N2_15 | C2_15 | 1.449(10) |
| N1_21  | C13_21 | 1.467(8)  | N2_15 | C7_15 | 1.455(11) |
| C11_21 | C12_21 | 1.534(10) | C1_15 | C2_15 | 1.452(13) |
| C13_21 | C14_21 | 1.527(10) | C3_15 | C4_15 | 1.528(11) |
| N1_22  | C11_22 | 1.457(9)  | C3_15 | C5_15 | 1.531(10) |
| N1_22  | C13_22 | 1.463(8)  | C3_15 | C6_15 | 1.569(11) |
| C11_22 | C12_22 | 1.537(10) | C7_15 | C8_15 | 1.535(13) |
| C13_22 | C14_22 | 1.518(10) | C7_15 | C9_15 | 1.538(12) |

|        |        |           |        |        |           |
|--------|--------|-----------|--------|--------|-----------|
| N1_23  | C11_23 | 1.469(9)  | C7_15  | C10_15 | 1.535(12) |
| N1_23  | C13_23 | 1.462(8)  | N1_14  | C11_14 | 1.458(8)  |
| C11_23 | C12_23 | 1.522(9)  | N1_14  | C13_14 | 1.454(10) |
| C13_23 | C14_23 | 1.511(10) | C11_14 | C12_14 | 1.495(13) |
| N1_24  | C11_24 | 1.453(10) | C13_14 | C14_14 | 1.525(14) |
| N1_24  | C13_24 | 1.469(9)  | N1_1   | C1_1   | 1.466(10) |
| C11_24 | C12_24 | 1.524(11) | N1_1   | C3_1   | 1.488(9)  |
| C13_24 | C14_24 | 1.526(10) | N2_1   | C2_1   | 1.460(10) |
| N1_25  | C11_25 | 1.466(8)  | N2_1   | C7_1   | 1.484(9)  |
| N1_25  | C13_25 | 1.460(9)  | C1_1   | C2_1   | 1.492(11) |
| C11_25 | C12_25 | 1.523(10) | C3_1   | C4_1   | 1.536(13) |
| C13_25 | C14_25 | 1.533(10) | C3_1   | C5_1   | 1.548(12) |
| N1_26  | C11_26 | 1.462(5)  | C3_1   | C6_1   | 1.521(11) |
| N1_26  | C13_26 | 1.462(5)  | C7_1   | C8_1   | 1.542(11) |
| C11_26 | C12_26 | 1.505(10) | C7_1   | C9_1   | 1.535(11) |
| C13_26 | C14_26 | 1.491(12) | C7_1   | C10_1  | 1.518(13) |

**Table S24.** Bond angles for 2-Ce<sup>6s</sup>.

| Atom  | Atom | Atom  | Angle/°    | Atom  | Atom | Atom  | Angle/°  |
|-------|------|-------|------------|-------|------|-------|----------|
| N2    | Ce1  | N3    | 109.2(2)   | N2_2  | C7_2 | C9_2  | 107.5(7) |
| N2    | Ce1  | N4    | 116.1(2)   | N2_2  | C7_2 | C10_2 | 111.9(6) |
| N3    | Ce1  | N4    | 97.08(19)  | C8_2  | C7_2 | C9_2  | 109.0(6) |
| N9    | Ce1  | N2    | 106.8(2)   | C10_2 | C7_2 | C8_2  | 108.4(8) |
| N9    | Ce1  | N3    | 116.6(2)   | C10_2 | C7_2 | C9_2  | 109.2(7) |
| N9    | Ce1  | N4    | 111.2(2)   | C7_2  | C9_2 | Cs1   | 101.3(4) |
| N3    | Cs1  | O1_19 | 144.2(2)   | C1_3  | N1_3 | P1    | 108.9(4) |
| N3    | Cs1  | N1_1  | 51.11(14)  | C1_3  | N1_3 | C3_3  | 115.5(7) |
| N4    | Cs1  | N3    | 71.75(13)  | C3_3  | N1_3 | P1    | 122.2(5) |
| N4    | Cs1  | O1_19 | 142.4(2)   | C2_3  | N2_3 | P1    | 113.8(5) |
| N4    | Cs1  | N1_1  | 121.81(14) | C2_3  | N2_3 | C7_3  | 118.8(6) |
| O1_19 | Cs1  | N1_1  | 95.8(2)    | C7_3  | N2_3 | P1    | 126.2(6) |
| N9    | P1   | N1_26 | 113.6(3)   | N1_3  | C1_3 | C2_3  | 104.7(7) |
| N9    | P1   | N1_3  | 122.3(3)   | N2_3  | C2_3 | C1_3  | 106.2(6) |
| N9    | P1   | N2_3  | 119.1(3)   | N1_3  | C3_3 | C4_3  | 108.5(6) |
| N1_26 | P1   | N1_3  | 102.2(3)   | N1_3  | C3_3 | C5_3  | 109.4(7) |
| N1_26 | P1   | N2_3  | 105.4(3)   | N1_3  | C3_3 | C6_3  | 111.7(5) |
| N2_3  | P1   | N1_3  | 90.6(3)    | C4_3  | C3_3 | C5_3  | 108.3(6) |
| N2    | P2   | N1_24 | 114.2(4)   | C6_3  | C3_3 | C4_3  | 110.2(8) |
| N2    | P2   | N1_4  | 120.5(4)   | C6_3  | C3_3 | C5_3  | 108.6(6) |
| N2    | P2   | N2_4  | 120.6(3)   | N2_3  | C7_3 | C8_3  | 110.1(7) |
| N1_24 | P2   | N1_4  | 104.5(3)   | N2_3  | C7_3 | C9_3  | 109.4(7) |
| N1_24 | P2   | N2_4  | 102.6(3)   | N2_3  | C7_3 | C10_3 | 110.6(7) |
| N1_4  | P2   | N2_4  | 90.8(3)    | C9_3  | C7_3 | C8_3  | 110.4(7) |
| N3    | P3   | N1_23 | 113.9(3)   | C10_3 | C7_3 | C8_3  | 108.3(7) |
| N3    | P3   | N1_1  | 115.9(3)   | C10_3 | C7_3 | C9_3  | 108.0(8) |
| N3    | P3   | N2_1  | 121.5(3)   | C1_4  | N1_4 | P2    | 112.9(5) |
| N1_23 | P3   | N1_1  | 109.8(3)   | C1_4  | N1_4 | C3_4  | 119.4(7) |
| N1_23 | P3   | N2_1  | 102.3(3)   | C3_4  | N1_4 | P2    | 125.0(5) |
| N2_1  | P3   | N1_1  | 90.7(3)    | C2_4  | N2_4 | P2    | 110.0(6) |
| N4    | P4   | N1_2  | 121.9(3)   | C2_4  | N2_4 | C7_4  | 116.9(7) |
| N4    | P4   | N2_2  | 117.6(3)   | C7_4  | N2_4 | P2    | 123.3(5) |
| N4    | P4   | N1_14 | 112.8(3)   | N1_4  | C1_4 | C2_4  | 109.8(8) |
| N2_2  | P4   | N1_2  | 90.8(3)    | N2_4  | C2_4 | C1_4  | 109.7(8) |
| N1_14 | P4   | N1_2  | 103.5(3)   | N1_4  | C3_4 | C4_4  | 109.1(7) |
| N1_14 | P4   | N2_2  | 107.3(3)   | N1_4  | C3_4 | C5_4  | 110.1(6) |
| P2    | N2   | Ce1   | 173.1(4)   | N1_4  | C3_4 | C6_4  | 110.9(6) |
| Ce1   | N3   | Cs1   | 95.38(18)  | C4_4  | C3_4 | C5_4  | 108.9(7) |
| P3    | N3   | Ce1   | 165.9(4)   | C4_4  | C3_4 | C6_4  | 109.7(8) |

|       |       |       |            |       |      |       |           |
|-------|-------|-------|------------|-------|------|-------|-----------|
| P3    | N3    | Cs1   | 98.2(3)    | C6_4  | C3_4 | C5_4  | 108.0(7)  |
| Ce1   | N4    | Cs1   | 95.59(18)  | N2_4  | C7_4 | C8_4  | 111.5(7)  |
| P4    | N4    | Ce1   | 161.1(4)   | N2_4  | C7_4 | C9_4  | 108.7(7)  |
| P4    | N4    | Cs1   | 101.9(3)   | N2_4  | C7_4 | C10_4 | 109.7(6)  |
| P1    | N9    | Ce1   | 168.4(4)   | C8_4  | C7_4 | C9_4  | 110.5(6)  |
| N5    | Ce2   | N6    | 110.8(2)   | C8_4  | C7_4 | C10_4 | 108.4(7)  |
| N5    | Ce2   | N7    | 112.6(2)   | C10_4 | C7_4 | C9_4  | 108.1(7)  |
| N5    | Ce2   | N8    | 113.7(2)   | C1_5  | N1_5 | P8    | 114.0(5)  |
| N6    | Ce2   | N7    | 113.62(19) | C1_5  | N1_5 | C3_5  | 116.4(6)  |
| N6    | Ce2   | N8    | 110.6(2)   | C3_5  | N1_5 | P8    | 122.8(5)  |
| N8    | Ce2   | N7    | 94.79(19)  | P8    | N2_5 | Cs2   | 84.4(2)   |
| N7    | Cs2   | N8    | 68.86(13)  | C2_5  | N2_5 | Cs2   | 113.3(5)  |
| N7    | Cs2   | O2    | 146.8(3)   | C2_5  | N2_5 | P8    | 110.7(4)  |
| N7    | Cs2   | N2_5  | 118.12(15) | C2_5  | N2_5 | C7_5  | 116.1(6)  |
| N8    | Cs2   | O2    | 141.0(3)   | C7_5  | N2_5 | Cs2   | 103.2(4)  |
| N8    | Cs2   | N2_5  | 50.96(14)  | C7_5  | N2_5 | P8    | 123.9(5)  |
| O2    | Cs2   | N2_5  | 94.8(3)    | N1_5  | C1_5 | C2_5  | 105.5(6)  |
| N5    | P5    | N1_20 | 112.6(3)   | N2_5  | C2_5 | C1_5  | 105.6(6)  |
| N5    | P5    | N1_6  | 120.4(3)   | N1_5  | C3_5 | C4_5  | 107.2(7)  |
| N5    | P5    | N2_6  | 120.7(3)   | N1_5  | C3_5 | C5_5  | 111.3(7)  |
| N1_20 | P5    | N1_6  | 104.0(3)   | N1_5  | C3_5 | C6_5  | 111.1(6)  |
| N1_20 | P5    | N2_6  | 104.3(3)   | C4_5  | C3_5 | C6_5  | 108.6(8)  |
| N2_6  | P5    | N1_6  | 91.7(3)    | C5_5  | C3_5 | C4_5  | 109.8(10) |
| N6    | P6    | N1_21 | 113.5(3)   | C5_5  | C3_5 | C6_5  | 108.8(8)  |
| N6    | P6    | N1_15 | 120.8(3)   | N2_5  | C7_5 | C8_5  | 112.2(5)  |
| N6    | P6    | N2_15 | 121.0(4)   | N2_5  | C7_5 | C9_5  | 108.3(8)  |
| N1_21 | P6    | N1_15 | 104.1(3)   | N2_5  | C7_5 | C10_5 | 111.2(6)  |
| N1_21 | P6    | N2_15 | 103.0(3)   | C9_5  | C7_5 | C8_5  | 108.7(7)  |
| N2_15 | P6    | N1_15 | 90.8(3)    | C9_5  | C7_5 | C10_5 | 108.0(7)  |
| N7    | P7    | N1_22 | 113.6(3)   | C10_5 | C7_5 | C8_5  | 108.3(8)  |
| N7    | P7    | N1_7  | 120.9(3)   | C7_5  | C9_5 | Cs2   | 79.9(5)   |
| N7    | P7    | N2_7  | 116.1(3)   | C1_6  | N1_6 | P5    | 108.7(5)  |
| N1_22 | P7    | N1_7  | 103.6(3)   | C1_6  | N1_6 | C3_6  | 116.1(5)  |
| N1_22 | P7    | N2_7  | 108.8(3)   | C3_6  | N1_6 | P5    | 121.9(4)  |
| N1_7  | P7    | N2_7  | 91.1(3)    | C2_6  | N2_6 | P5    | 114.3(5)  |
| N8    | P8    | N1_25 | 113.4(3)   | C2_6  | N2_6 | C7_6  | 117.5(6)  |
| N8    | P8    | N1_5  | 121.9(3)   | C7_6  | N2_6 | P5    | 128.1(4)  |
| N8    | P8    | N2_5  | 115.6(3)   | N1_6  | C1_6 | C2_6  | 105.8(5)  |
| N1_25 | P8    | N1_5  | 103.6(3)   | N2_6  | C2_6 | C1_6  | 105.3(5)  |
| N1_25 | P8    | N2_5  | 108.5(3)   | N1_6  | C3_6 | C4_6  | 108.6(5)  |
| N1_5  | P8    | N2_5  | 91.2(3)    | N1_6  | C3_6 | C5_6  | 109.7(5)  |
| P5    | N5    | Ce2   | 172.4(4)   | N1_6  | C3_6 | C6_6  | 112.6(6)  |
| P6    | N6    | Ce2   | 170.7(4)   | C5_6  | C3_6 | C4_6  | 107.0(7)  |
| Ce2   | N7    | Cs2   | 98.18(17)  | C6_6  | C3_6 | C4_6  | 109.3(6)  |
| P7    | N7    | Ce2   | 165.6(3)   | C6_6  | C3_6 | C5_6  | 109.4(6)  |
| P7    | N7    | Cs2   | 95.7(3)    | N2_6  | C7_6 | C8_6  | 109.5(6)  |
| Ce2   | N8    | Cs2   | 97.99(19)  | N2_6  | C7_6 | C9_6  | 110.9(6)  |
| P8    | N8    | Ce2   | 165.1(4)   | N2_6  | C7_6 | C10_6 | 110.2(6)  |
| P8    | N8    | Cs2   | 96.7(3)    | C8_6  | C7_6 | C9_6  | 109.7(7)  |
| C5    | O2    | Cs2   | 111.8(6)   | C8_6  | C7_6 | C10_6 | 108.3(6)  |
| C7    | O2    | Cs2   | 134.9(6)   | C9_6  | C7_6 | C10_6 | 108.2(6)  |
| C7    | O2    | C5    | 113.3(4)   | C1_7  | N1_7 | P7    | 113.4(5)  |
| O2    | C5    | Cs2   | 48.4(4)    | C1_7  | N1_7 | C3_7  | 116.7(5)  |
| O2    | C5    | C6    | 108.3(4)   | C3_7  | N1_7 | P7    | 124.3(4)  |
| C6    | C5    | Cs2   | 102.8(9)   | P7    | N2_7 | Cs2   | 82.80(19) |
| O2    | C7    | C8    | 108.8(4)   | C2_7  | N2_7 | Cs2   | 109.7(4)  |
| C2_18 | O1_18 | C3_18 | 112.7(10)  | C2_7  | N2_7 | P7    | 111.1(4)  |
| O1_18 | C2_18 | C1_18 | 109.7(12)  | C2_7  | N2_7 | C7_7  | 116.0(5)  |

|        |        |        |           |        |        |        |          |
|--------|--------|--------|-----------|--------|--------|--------|----------|
| O1_18  | C3_18  | C4_18  | 108.4(14) | C7_7   | N2_7   | Cs2    | 105.3(4) |
| C2_19  | O1_19  | Cs1    | 119.9(9)  | C7_7   | N2_7   | P7     | 125.2(5) |
| C2_19  | O1_19  | C3_19  | 110.0(8)  | N1_7   | C1_7   | C2_7   | 106.1(5) |
| C3_19  | O1_19  | Cs1    | 112.7(8)  | N2_7   | C2_7   | C1_7   | 104.6(5) |
| O1_19  | C2_19  | C1_19  | 107.8(13) | N1_7   | C3_7   | C4_7   | 111.0(7) |
| O1_19  | C3_19  | C4_19  | 107.4(13) | N1_7   | C3_7   | C5_7   | 111.5(6) |
| C2_27  | O1_27  | C3_27  | 112.2(12) | N1_7   | C3_7   | C6_7   | 108.1(6) |
| O1_27  | C2_27  | C1_27  | 108.9(14) | C5_7   | C3_7   | C4_7   | 108.6(7) |
| O1_27  | C3_27  | C4_27  | 108.9(13) | C5_7   | C3_7   | C6_7   | 107.5(8) |
| C11_20 | N1_20  | P5     | 121.7(4)  | C6_7   | C3_7   | C4_7   | 110.1(9) |
| C11_20 | N1_20  | C13_20 | 117.3(5)  | N2_7   | C7_7   | C8_7   | 112.1(6) |
| C13_20 | N1_20  | P5     | 120.6(4)  | N2_7   | C7_7   | C9_7   | 108.2(6) |
| N1_20  | C11_20 | C12_20 | 113.0(6)  | N2_7   | C7_7   | C10_7  | 110.2(6) |
| N1_20  | C13_20 | C14_20 | 114.8(6)  | C8_7   | C7_7   | C9_7   | 107.8(7) |
| C11_21 | N1_21  | P6     | 120.7(5)  | C10_7  | C7_7   | C8_7   | 109.2(7) |
| C11_21 | N1_21  | C13_21 | 117.2(5)  | C10_7  | C7_7   | C9_7   | 109.2(7) |
| C13_21 | N1_21  | P6     | 122.0(4)  | C1_15  | N1_15  | P6     | 111.4(6) |
| N1_21  | C11_21 | C12_21 | 113.5(6)  | C1_15  | N1_15  | C3_15  | 116.2(6) |
| N1_21  | C13_21 | C14_21 | 114.8(6)  | C3_15  | N1_15  | P6     | 122.7(4) |
| C11_22 | N1_22  | P7     | 121.8(4)  | C2_15  | N2_15  | P6     | 112.9(6) |
| C11_22 | N1_22  | C13_22 | 116.1(5)  | C2_15  | N2_15  | C7_15  | 117.7(6) |
| C13_22 | N1_22  | P7     | 122.1(5)  | C7_15  | N2_15  | P6     | 124.8(5) |
| N1_22  | C11_22 | C12_22 | 112.4(7)  | N1_15  | C1_15  | C2_15  | 109.8(7) |
| N1_22  | C13_22 | C14_22 | 114.6(6)  | N2_15  | C2_15  | C1_15  | 109.3(6) |
| C11_23 | N1_23  | P3     | 121.4(4)  | N1_15  | C3_15  | C4_15  | 108.6(6) |
| C13_23 | N1_23  | P3     | 122.0(5)  | N1_15  | C3_15  | C5_15  | 109.5(5) |
| C13_23 | N1_23  | C11_23 | 116.5(6)  | N1_15  | C3_15  | C6_15  | 111.5(7) |
| N1_23  | C11_23 | C12_23 | 113.9(6)  | C4_15  | C3_15  | C5_15  | 107.9(7) |
| N1_23  | C13_23 | C14_23 | 116.1(6)  | C4_15  | C3_15  | C6_15  | 111.0(6) |
| C11_24 | N1_24  | P2     | 120.1(5)  | C5_15  | C3_15  | C6_15  | 108.2(6) |
| C11_24 | N1_24  | C13_24 | 116.0(6)  | N2_15  | C7_15  | C8_15  | 110.9(7) |
| C13_24 | N1_24  | P2     | 120.7(6)  | N2_15  | C7_15  | C9_15  | 109.8(8) |
| N1_24  | C11_24 | C12_24 | 113.9(8)  | N2_15  | C7_15  | C10_15 | 110.7(6) |
| N1_24  | C13_24 | C14_24 | 116.1(6)  | C8_15  | C7_15  | C9_15  | 110.0(7) |
| C11_25 | N1_25  | P8     | 121.4(5)  | C10_15 | C7_15  | C8_15  | 107.8(8) |
| C13_25 | N1_25  | P8     | 122.3(4)  | C10_15 | C7_15  | C9_15  | 107.5(8) |
| C13_25 | N1_25  | C11_25 | 116.3(6)  | C11_14 | N1_14  | P4     | 121.6(5) |
| N1_25  | C11_25 | C12_25 | 113.3(7)  | C13_14 | N1_14  | P4     | 122.0(4) |
| N1_25  | C13_25 | C14_25 | 114.7(7)  | C13_14 | N1_14  | C11_14 | 116.3(6) |
| C11_26 | N1_26  | P1     | 121.3(4)  | N1_14  | C11_14 | C12_14 | 116.3(7) |
| C13_26 | N1_26  | P1     | 119.9(5)  | N1_14  | C13_14 | C14_14 | 113.9(8) |
| C13_26 | N1_26  | C11_26 | 118.8(6)  | P3     | N1_1   | Cs1    | 85.2(2)  |
| N1_26  | C11_26 | C12_26 | 113.9(6)  | C1_1   | N1_1   | Cs1    | 108.9(5) |
| N1_26  | C13_26 | C14_26 | 116.9(7)  | C1_1   | N1_1   | P3     | 111.5(5) |
| C1_2   | N1_2   | P4     | 111.7(4)  | C1_1   | N1_1   | C3_1   | 116.8(5) |
| C1_2   | N1_2   | C3_2   | 116.8(6)  | C3_1   | N1_1   | Cs1    | 104.2(4) |
| C3_2   | N1_2   | P4     | 122.9(4)  | C3_1   | N1_1   | P3     | 123.6(5) |
| P4     | N2_2   | Cs1    | 73.4(2)   | C2_1   | N2_1   | P3     | 112.0(5) |
| C2_2   | N2_2   | Cs1    | 95.7(4)   | C2_1   | N2_1   | C7_1   | 117.0(6) |
| C2_2   | N2_2   | P4     | 114.2(4)  | C7_1   | N2_1   | P3     | 122.3(5) |
| C2_2   | N2_2   | C7_2   | 118.5(5)  | N1_1   | C1_1   | C2_1   | 105.5(6) |
| C7_2   | N2_2   | Cs1    | 106.8(4)  | N2_1   | C2_1   | C1_1   | 104.8(7) |
| C7_2   | N2_2   | P4     | 126.9(5)  | N1_1   | C3_1   | C4_1   | 108.1(7) |
| N1_2   | C1_2   | Cs1    | 85.1(4)   | N1_1   | C3_1   | C5_1   | 110.0(5) |
| N1_2   | C1_2   | C2_2   | 105.4(6)  | N1_1   | C3_1   | C6_1   | 113.0(6) |
| C2_2   | C1_2   | Cs1    | 93.0(4)   | C4_1   | C3_1   | C5_1   | 108.0(7) |
| N2_2   | C2_2   | C1_2   | 105.7(5)  | C6_1   | C3_1   | C4_1   | 108.2(7) |
| N1_2   | C3_2   | C4_2   | 110.0(6)  | C6_1   | C3_1   | C5_1   | 109.3(7) |

|      |      |      |          |       |      |       |          |
|------|------|------|----------|-------|------|-------|----------|
| N1_2 | C3_2 | C5_2 | 111.3(6) | C3_1  | C5_1 | Cs1   | 82.3(5)  |
| N1_2 | C3_2 | C6_2 | 109.2(6) | N2_1  | C7_1 | C8_1  | 108.0(6) |
| C4_2 | C3_2 | C5_2 | 108.7(7) | N2_1  | C7_1 | C9_1  | 110.6(7) |
| C6_2 | C3_2 | C4_2 | 108.2(6) | N2_1  | C7_1 | C10_1 | 110.4(6) |
| C6_2 | C3_2 | C5_2 | 109.4(6) | C9_1  | C7_1 | C8_1  | 110.0(7) |
| C3_2 | C5_2 | Cs1  | 111.4(5) | C10_1 | C7_1 | C8_1  | 109.0(8) |
| N2_2 | C7_2 | C8_2 | 110.7(7) | C10_1 | C7_1 | C9_1  | 108.9(7) |

## References

1. Rice, N. T.; Popov, I. A.; Russo, D. R.; Bacsa, J.; Batista, E. R.; Yang, P.; Telser, J.; La Pierre, H. S., *J. Am. Chem. Soc.* **2019**, *141* (33), 13222-13233.
2. Gompa, T. P.; Rice, N. T.; Russo, D. R.; Aguirre Quintana, L. M.; Yik, B. J.; Bacsa, J.; La Pierre, H. S., *Dalton Trans.* **2019**, *48* (23), 8030- 8033.
3. Evans, W. J.; Kozimor, S. A.; Ziller, J. W.; Kaltsoyannis, N., *J. Am. Chem. Soc.* **2004**, *126* (44), 14533-14547.
4. Johnson, S. A.; Kiernicki, J. J.; Fanwick, P. E.; Bart, S. C., *Organometallics* **2015**, *34* (12), 2889-2895.
5. Perrin, D. D., *Ionisation Constants of Inorganic Acids and Bases in Aqueous Solution*. Pergamon, **1982**.
6. Shannon, R., *Acta Crystallogr. A* **1976**, *32* (5), 751-767.
7. Perdew, J. P.; Emzerhof, M.; Burke, K., *J. Chem. Phys.* **1996**, *105*, 9982.
8. Gaussian 16, Revision A.03, Frisch, M. J.; Trucks, G. W.; Schlegel, H. B.; Scuseria, G. E.; Robb, M. A.; Cheeseman, J. R.; Scalmani, G.; Barone, V.; Petersson, G. A.; Nakatsuji, H.; Li, X.; Caricato, M.; Marenich, A. V.; Bloino, J.; Janesko, B. G.; Gomperts, R.; Mennucci, B.; Hratchian, H. P.; Ortiz, J. V.; Izmaylov, A. F.; Sonnenberg, J. L.; Williams-Young, D.; Ding, F.; Lipparini, F.; Egidi, F.; Goings, J.; Peng, B.; Petrone, A.; Henderson, T.; Ranasinghe, D.; Zakrzewski, V. G.; Gao, J.; Rega, N.; Zheng, G.; Liang, W.; Hada, M.; Ehara, M.; Toyota, K.; Fukuda, R.; Hasegawa, J.; Ishida, M.; Nakajima, T.; Honda, Y.; Kitao, O.; Nakai, H.; Vreven, T.; Throssell, K.; Montgomery, J. A., Jr.; Peralta, J. E.; Ogliaro, F.; Bearpark, M. J.; Heyd, J. J.; Brothers, E. N.; Kudin, K. N.; Staroverov, V. N.; Keith, T. A.; Kobayashi, R.; Normand, J.; Raghavachari, K.; Rendell, A. P.; Burant, J. C.; Iyengar, S. S.; Tomasi, J.; Cossi, M.; Millam, J. M.; Klene, M.; Adamo, C.; Cammi, R.; Ochterski, J. W.; Martin, R. L.; Morokuma, K.; Farkas, O.; Foresman, J. B.; Fox, D. J. Gaussian, Inc., Wallingford CT, **2016**.
9. Cao, X.; Dolg, M., *J. Chem. Phys.* **2001**, *115*, 7348.
10. Dolg, M.; Stoll, H.; Preuss, H., *J. Chem. Phys.* **1989**, *90*, 1730.
11. Unpublished: A. Bergner, Arbeitsbericht **1990**.
12. Leininger, T.; Nicklass, A.; Kuchle, W.; Stoll, H.; Dolg, M.; Bergner, A., *Chem. Phys. Lett.* **1996**, *255*, 274-280.
13. Krishnan, R.; Binkley, J. S.; Seeger, R.; Pople, J. A., *J. Chem. Phys.* **1980**, *72*, 650-654.
14. Zubarev, D. Y.; Boldyrev, A. I., *Phys. Chem. Chem. Phys.* **2008**, *10*, 5207-5217.
15. Tkachenko, N. V.; Boldyrev, A. I., *Phys. Chem. Chem. Phys.* **2019**, *21*, 9590-9596.
16. Kelley, M. P.; Popov, I. A.; Jung, J.; Batista, E. R.; Yang, P., *Nat. Commun.* **2020**, *11*, 1558.
17. Kulichenko, M.; Fedik, N.; Boldyrev, A.; Muñoz-Castro, A., *Chem. Eur. J.* **2020**, *26*, 2263-2268.
18. Sergeeva, A. P.; Boldyrev, A. I., *Comments Inorg. Chem.* **2010**, *31*, 2-12.
19. Runge, E.; Gross, E. K. U., *Phys. Rev. Lett.* **1984**, *52*, 997-1000.



20. Casida, M. E., *Recent Advances in Density Functional Methods, Part I*, World Scientific Singapore, **1995**; pp. 155-192.
21. Martin, R. L., *J. Chem. Phys.* **2003**, *118*, 4775-4777.
22. Cancès, E., *J. Chem. Phys.* **1997**, *107*, 3032.
23. Mennucci, B.; Cancès, E.; Tomasi, J., *J. Phys. Chem. B* **1997**, *101*, 10506-10517.
24. Cancès, E.; Mennucci, B., *J. Mat. Chem.* **1998**, *23*, 309-326.
25. Hay, P. J.; Wadt, W. R., *J. Chem. Phys.* **1985**, *82*, 299-310.
26. Roy, L. E.; Hay, P. J.; Martin, R. L., *J. Chem. Theory Comput.* **2008**, *4*, 1029-1031.
27. Skripnikov, L. *Chemissian v4.67*.
28. G. A. Zhurko, *Chemcraft - Graphical Software for Visualization of Quantum Chemistry Computations*, 2005.
29. a) Krause, L., Herbst-Irmer, R., Sheldrick, G., Stalke, D., *J. Appl. Crystallogr.* **2015**, *48*, 3-10. b) Bruker, V8.40B ed., Bruker AXS Inc., Madison, Wisconsin, USA.
30. Sheldrick, G. *Acta Crystallogr. A* **2015**, *71*, 3-8.
31. Dolomanov, O., Bourhis, L., Gildea, R., Howard, J., Puschmann, H., *J. Appl. Crystallogr.* **2009**, *42*, 339-341.
